# Supplementary material for: Tox21Enricher-Shiny: an R Shiny application for toxicity functional annotation analysis
Source: Front Toxicol. 2023 Jun 27;5:1147608. doi: 10.3389/ftox.2023.1147608 (PMC10333489; doi:10.3389/ftox.2023.1147608)
Supplement: Supplementary file 2 [file Table3.XLSX]

## Sheet: Bisphenol results
Category	Term	Count	%	PValue	CASRNs	List Total	Pop Hits	Pop Total	Fold Enrichment	Bonferroni	Benjamini-Yekutieli	Benjamini-Hochberg
TOXPRINT_STRUCTURE	chain:aromaticAlkane_Ph-C1-Ph	36	47.37	0	611-99-4, 27955-94-8, 126-00-1, 79-97-0, 21850-44-2, 68392-35-8, 52479-85-3, 85-60-9, 41351-30-8, 14868-03-2, 79-95-8, 72-43-5, 31127-54-5, 4162-45-2, 1470-79-7, 25327-89-3, 131-54-4, 79-94-7, 118-82-1, 1565-94-2, 569-57-3, 603-50-9, 80-05-7, 131-55-5, 77-40-7, 81-90-3, 61445-50-9, 5613-46-7, 6807-17-6, 38103-06-9, 10040-45-6, 1478-61-1, 620-92-8, 2624-43-3, 68047-06-3, 2971-36-0	67	259	8195	17	0	0	0
TOXPRINT_STRUCTURE	bond:COH_alcohol_aromatic_phenol	47	61.84	0	34487-61-1, 611-99-4, 29767-20-2, 14868-03-2, 41351-30-8, 131-54-4, 3236-71-3, 5613-46-7, 80-05-7, 68392-35-8, 517-28-2, 15905-32-5, 79-94-7, 843-55-0, 68047-06-3, 2971-36-0, 115-39-9, 620-92-8, 71-67-0, 77-40-7, 126-00-1, 1470-79-7, 85-60-9, 77-09-8, 139233-53-7, 143-74-8, 1943-97-1, 15086-94-9, 27072-45-3, 13473-26-2, 67227-56-9, 131-55-5, 81-90-3, 52479-85-3, 6559-91-7, 79-97-0, 76-60-8, 125-3…	67	731	8195	7.86	0	0	0
TOXPRINT_STRUCTURE	bond:COH_alcohol_aromatic	47	61.84	0	1478-61-1, 61445-50-9, 6807-17-6, 118-82-1, 33419-42-0, 31127-54-5, 79-95-8, 125-13-3, 6559-91-7, 52479-85-3, 76-60-8, 79-97-0, 125-31-5, 27955-94-8, 13473-26-2, 27072-45-3, 67227-56-9, 81-90-3, 131-55-5, 77-09-8, 139233-53-7, 143-74-8, 1943-97-1, 15086-94-9, 1470-79-7, 85-60-9, 126-00-1, 68047-06-3, 2971-36-0, 620-92-8, 115-39-9, 71-67-0, 77-40-7, 79-94-7, 843-55-0, 517-28-2, 15905-32-5, 68392-3…	67	760	8195	7.56	0	0	0
TOXPRINT_STRUCTURE	chain:aromaticAlkane_Ar-C-Ar	36	47.37	0	52479-85-3, 68392-35-8, 21850-44-2, 79-97-0, 126-00-1, 27955-94-8, 611-99-4, 25327-89-3, 4162-45-2, 1470-79-7, 31127-54-5, 72-43-5, 79-95-8, 14868-03-2, 41351-30-8, 85-60-9, 603-50-9, 1565-94-2, 569-57-3, 118-82-1, 79-94-7, 131-54-4, 2971-36-0, 68047-06-3, 2624-43-3, 620-92-8, 1478-61-1, 38103-06-9, 10040-45-6, 6807-17-6, 5613-46-7, 61445-50-9, 81-90-3, 77-40-7, 131-55-5, 80-05-7	67	317	8195	13.89	0	0	0
MULTICASE_TOX_PREDICTION	MRP2 substrates	61	80.26	0	2624-43-3, 13473-26-2, 10040-45-6, 1943-97-1, 15086-94-9, 126-00-1, 61445-50-9, 6807-17-6, 1565-94-2, 118-82-1, 125-13-3, 52479-85-3, 6559-91-7, 79-97-0, 27955-94-8, 3236-71-3, 5613-46-7, 29767-20-2, 34487-61-1, 115-39-9, 77-40-7, 79-94-7, 517-28-2, 72-43-5, 15905-32-5, 27072-45-3, 143-74-8, 33419-42-0, 569-57-3, 14868-03-2, 68392-35-8, 518-47-8, 67227-56-9, 139233-53-7, 85-60-9, 1478-61-1, 30299…	67	3051	7882	2.35	0	0	0
TOXPRINT_STRUCTURE	ring:aromatic_benzene	67	88.16	0	68047-06-3, 71-67-0, 843-55-0, 38103-06-9, 31477-60-8, 603-50-9, 131-54-4, 79-95-8, 125-31-5, 81-90-3, 131-55-5, 77-09-8, 1470-79-7, 2971-36-0, 620-92-8, 518-28-5, 115-33-3, 14008-48-1, 16423-68-0, 80-05-7, 41351-30-8, 611-99-4, 117091-64-2, 1478-61-1, 30299-08-2, 31127-54-5, 76-60-8, 518-47-8, 67227-56-9, 139233-53-7, 85-60-9, 68392-35-8, 569-57-3, 25327-89-3, 14868-03-2, 22345-47-7, 33419-42-0,…	67	4542	8195	1.8	0	0	0
TOXPRINT_STRUCTURE	bond:COH_alcohol_generic	51	67.11	0	1470-79-7, 77-09-8, 143-74-8, 27072-45-3, 81-90-3, 131-55-5, 125-31-5, 79-95-8, 33419-42-0, 14868-03-2, 131-54-4, 68392-35-8, 843-55-0, 68047-06-3, 71-67-0, 126-00-1, 85-60-9, 139233-53-7, 15086-94-9, 1943-97-1, 13473-26-2, 67227-56-9, 79-97-0, 76-60-8, 52479-85-3, 6559-91-7, 27955-94-8, 4162-45-2, 125-13-3, 31127-54-5, 1565-94-2, 118-82-1, 1478-61-1, 6807-17-6, 61445-50-9, 117091-64-2, 611-99-4,…	67	2130	8195	2.93	0	0	0
HTS_ACTIVE	counter screen (cell viability):tox21-casp3-cho-p1_viability@cho-k1_1	49	64.47	0	569-57-3, 131-54-4, 38103-06-9, 13080-86-9, 24038-68-4, 14868-03-2, 843-55-0, 68047-06-3, 1260-17-9, 68392-35-8, 143-74-8, 131-55-5, 1470-79-7, 33419-42-0, 79-95-8, 1571-75-1, 16423-68-0, 3236-71-3, 80-05-7, 5613-46-7, 34487-61-1, 518-28-5, 4221-68-5, 79-94-7, 620-92-8, 115-39-9, 2971-36-0, 77-40-7, 14008-48-1, 517-28-2, 15905-32-5, 72-43-5, 139233-53-7, 15086-94-9, 1943-97-1, 13473-26-2, 2624-43…	68	1693	6512	2.77	0	0	0
MESH	Hydrocarbons, Aromatic	31	40.79	0	15905-32-5, 620-92-8, 115-39-9, 68047-06-3, 2971-36-0, 77-40-7, 1260-17-9, 518-28-5, 843-55-0, 79-94-7, 117091-64-2, 3236-71-3, 80-05-7, 569-57-3, 603-50-9, 33419-42-0, 79-95-8, 76-60-8, 52479-85-3, 6559-91-7, 1478-61-1, 1565-94-2, 118-82-1, 85-60-9, 518-47-8, 13473-26-2, 2624-43-3, 131-55-5, 77-09-8, 1943-97-1, 143-74-8	42	964	5355	4.1	0	0	0
MESH	Hydrocarbons, Cyclic	32	42.11	0	143-74-8, 1943-97-1, 77-09-8, 131-55-5, 27072-45-3, 2624-43-3, 13473-26-2, 518-47-8, 85-60-9, 118-82-1, 1565-94-2, 1478-61-1, 6559-91-7, 52479-85-3, 76-60-8, 79-95-8, 33419-42-0, 603-50-9, 569-57-3, 80-05-7, 3236-71-3, 117091-64-2, 79-94-7, 843-55-0, 518-28-5, 1260-17-9, 77-40-7, 2971-36-0, 68047-06-3, 115-39-9, 620-92-8, 15905-32-5	42	1089	5355	3.75	0	0	0
MULTICASE_TOX_PREDICTION	OCT1 substrates	50	65.79	0	33419-42-0, 79-95-8, 125-31-5, 81-90-3, 131-55-5, 27072-45-3, 143-74-8, 77-09-8, 1470-79-7, 71-67-0, 1260-17-9, 68047-06-3, 843-55-0, 68392-35-8, 131-54-4, 14868-03-2, 61445-50-9, 6807-17-6, 1478-61-1, 118-82-1, 31127-54-5, 125-13-3, 27955-94-8, 52479-85-3, 6559-91-7, 79-97-0, 76-60-8, 67227-56-9, 13473-26-2, 518-47-8, 1943-97-1, 15086-94-9, 139233-53-7, 85-60-9, 126-00-1, 77-40-7, 2971-36-0, 620…	67	2352	7882	2.5	0	0	0
TOXPRINT_STRUCTURE	chain:aromaticAlkane_Ph-C1_cyclic	32	42.11	0	14008-48-1, 517-28-2, 15905-32-5, 518-28-5, 843-55-0, 115-33-3, 115-39-9, 71-67-0, 34487-61-1, 117091-64-2, 29767-20-2, 16423-68-0, 3236-71-3, 38103-06-9, 31477-60-8, 76-60-8, 6559-91-7, 125-31-5, 125-13-3, 33419-42-0, 22345-47-7, 30299-08-2, 77-09-8, 139233-53-7, 15086-94-9, 1943-97-1, 143-74-8, 518-47-8, 13473-26-2, 27072-45-3, 129-16-8, 67227-56-9	67	890	8195	4.4	0	0	0
HTS_ACTIVE	counter screen (cell viability):tox21-pgc-err-p1_viability_1	39	51.32	0	85-60-9, 15086-94-9, 143-74-8, 1943-97-1, 131-55-5, 13473-26-2, 27955-94-8, 76-60-8, 79-97-0, 52479-85-3, 31127-54-5, 33419-42-0, 4162-45-2, 1565-94-2, 6807-17-6, 61445-50-9, 1478-61-1, 34487-61-1, 14868-03-2, 24038-68-4, 131-54-4, 1571-75-1, 80-05-7, 13080-86-9, 5613-46-7, 16423-68-0, 3236-71-3, 68392-35-8, 15905-32-5, 14008-48-1, 517-28-2, 843-55-0, 4221-68-5, 518-28-5, 77-40-7, 1260-17-9, 115-…	68	1129	6512	3.31	0	0	0
HTS_ACTIVE	sex hormone homeostasis:tox21-erb-bla-antagonist-p1_erb-antagonist_1	30	39.47	0	843-55-0, 115-33-3, 79-94-7, 77-40-7, 61445-50-9, 6807-17-6, 1478-61-1, 68047-06-3, 2971-36-0, 27955-94-8, 68392-35-8, 52479-85-3, 125-13-3, 72-43-5, 79-95-8, 14008-48-1, 517-28-2, 1571-75-1, 1943-97-1, 77-09-8, 569-57-3, 603-50-9, 139233-53-7, 80-05-7, 5613-46-7, 3236-71-3, 2624-43-3, 126-00-1, 14868-03-2, 1470-79-7	68	628	6512	4.57	0	0	0
LEADSCOPE_TOXICITY	Reproductive Toxicity: repro rat female	26	34.21	0	76-60-8, 6559-91-7, 52479-85-3, 68392-35-8, 31127-54-5, 118-82-1, 71-67-0, 6807-17-6, 61445-50-9, 115-39-9, 2971-36-0, 68047-06-3, 611-99-4, 85-60-9, 14868-03-2, 1470-79-7, 15086-94-9, 1943-97-1, 77-09-8, 569-57-3, 129-16-8, 131-55-5, 31477-60-8, 13473-26-2, 2624-43-3, 3236-71-3	66	521	7259	5.49	0	0	0
HTS_STRONGACTIVE	sex hormone homeostasis:tox21-er-luc-bg1-4e2-agonist-p4_er-agonist_1	18	23.68	0	1943-97-1, 131-54-4, 843-55-0, 611-99-4, 569-57-3, 79-97-0, 31127-54-5, 6807-17-6, 14868-03-2, 61445-50-9, 77-40-7, 131-55-5, 80-05-7, 2971-36-0, 1470-79-7, 2624-43-3, 620-92-8, 1478-61-1	61	146	4870	9.84	0	0	0
HTS_STRONGACTIVE	sex hormone homeostasis:tox21-erb-bla-antagonist-p1_erb-antagonist_1	25	32.89	0	125-13-3, 72-43-5, 79-95-8, 14008-48-1, 27955-94-8, 68392-35-8, 52479-85-3, 77-40-7, 61445-50-9, 6807-17-6, 1478-61-1, 68047-06-3, 2971-36-0, 843-55-0, 79-94-7, 14868-03-2, 80-05-7, 5613-46-7, 3236-71-3, 2624-43-3, 1571-75-1, 1943-97-1, 77-09-8, 569-57-3, 603-50-9	61	361	4870	5.53	0	0	0
LEADSCOPE_TOXICITY	Reproductive Toxicity: repro rodent female	29	38.16	0	118-82-1, 6807-17-6, 61445-50-9, 76-60-8, 52479-85-3, 21850-44-2, 27955-94-8, 79-95-8, 31127-54-5, 77-09-8, 1943-97-1, 2624-43-3, 13473-26-2, 131-55-5, 1470-79-7, 79-94-7, 115-39-9, 620-92-8, 2971-36-0, 68047-06-3, 77-40-7, 71-67-0, 68392-35-8, 569-57-3, 3236-71-3, 80-05-7, 34487-61-1, 611-99-4, 14868-03-2	66	697	7259	4.58	0	0	0
HTS_ACTIVE	counter screen (cell viability):tox21-err-p1_viability_1	39	51.32	0	5613-46-7, 13080-86-9, 80-05-7, 3236-71-3, 16423-68-0, 1571-75-1, 131-54-4, 14868-03-2, 24038-68-4, 34487-61-1, 1260-17-9, 77-40-7, 68047-06-3, 2971-36-0, 115-39-9, 843-55-0, 518-28-5, 4221-68-5, 15905-32-5, 517-28-2, 14008-48-1, 68392-35-8, 13473-26-2, 1943-97-1, 143-74-8, 15086-94-9, 85-60-9, 61445-50-9, 6807-17-6, 1478-61-1, 1565-94-2, 33419-42-0, 31127-54-5, 125-13-3, 4162-45-2, 27955-94-8, 5…	68	1182	6512	3.16	0	0	0
HTS_ACTIVE	counter screen (cell viability):tox21-shh-3t3-gli3-agonist-p1_viability_1	39	51.32	0	1571-75-1, 603-50-9, 80-05-7, 13080-86-9, 5613-46-7, 16423-68-0, 3236-71-3, 34487-61-1, 14868-03-2, 24038-68-4, 115-33-3, 843-55-0, 4221-68-5, 77-40-7, 1260-17-9, 115-39-9, 2971-36-0, 68047-06-3, 68392-35-8, 15905-32-5, 517-28-2, 1943-97-1, 143-74-8, 139233-53-7, 77-09-8, 67227-56-9, 13473-26-2, 85-60-9, 1565-94-2, 6807-17-6, 1478-61-1, 27955-94-8, 76-60-8, 79-97-0, 52479-85-3, 125-13-3, 31127-54…	68	1197	6512	3.12	0	0	0
HTS_ACTIVE	counter screen (cell viability):tox21-casp3-hepg2-p1_viability@hepg2_1	36	47.37	0	15905-32-5, 517-28-2, 68392-35-8, 1260-17-9, 2971-36-0, 68047-06-3, 115-39-9, 79-94-7, 843-55-0, 4221-68-5, 518-28-5, 24038-68-4, 34487-61-1, 5613-46-7, 13080-86-9, 3236-71-3, 16423-68-0, 1571-75-1, 131-54-4, 31127-54-5, 33419-42-0, 4162-45-2, 27955-94-8, 52479-85-3, 79-97-0, 76-60-8, 6807-17-6, 61445-50-9, 1478-61-1, 1565-94-2, 85-60-9, 13473-26-2, 143-74-8, 1943-97-1, 15086-94-9, 139233-53-7	68	1018	6512	3.39	0	0	0
HTS_ACTIVE	sex hormone homeostasis:tox21-er-luc-bg1-4e2-agonist-p4_er-agonist_1	19	25	0	2971-36-0, 2624-43-3, 620-92-8, 1478-61-1, 6807-17-6, 61445-50-9, 131-55-5, 77-40-7, 80-05-7, 569-57-3, 1943-97-1, 1571-75-1, 131-54-4, 843-55-0, 1470-79-7, 31127-54-5, 14868-03-2, 79-97-0, 611-99-4	68	226	6512	8.05	0	0	0
MULTICASE_TOX_PREDICTION	MRP1 substrates	54	71.05	0	1478-61-1, 76-60-8, 31127-54-5, 139233-53-7, 67227-56-9, 518-47-8, 85-60-9, 115-33-3, 620-92-8, 2971-36-0, 14008-48-1, 80-05-7, 16423-68-0, 611-99-4, 117091-64-2, 41351-30-8, 125-31-5, 79-95-8, 77-09-8, 131-55-5, 81-90-3, 1470-79-7, 843-55-0, 1260-17-9, 71-67-0, 131-54-4, 603-50-9, 38103-06-9, 118-82-1, 1565-94-2, 61445-50-9, 6807-17-6, 27955-94-8, 79-97-0, 52479-85-3, 6559-91-7, 125-13-3, 15086-…	67	3067	7882	2.07	0	0	0
HTS_ACTIVE	counter screen (cell viability):tox21-pxr-p1_viability_1	42	55.26	0	143-74-8, 131-55-5, 33419-42-0, 79-95-8, 131-54-4, 13080-86-9, 14868-03-2, 24038-68-4, 843-55-0, 1260-17-9, 68047-06-3, 68392-35-8, 15086-94-9, 1943-97-1, 139233-53-7, 13473-26-2, 85-60-9, 61445-50-9, 6807-17-6, 1478-61-1, 27955-94-8, 76-60-8, 79-97-0, 52479-85-3, 31127-54-5, 4162-45-2, 1571-75-1, 80-05-7, 5613-46-7, 16423-68-0, 3236-71-3, 34487-61-1, 79-94-7, 518-28-5, 4221-68-5, 77-40-7, 115-39…	68	1459	6512	2.76	0	0	0
MESH	Hydrocarbons	33	43.42	0	85-60-9, 2624-43-3, 13473-26-2, 518-47-8, 1943-97-1, 52479-85-3, 6559-91-7, 76-60-8, 1478-61-1, 1565-94-2, 118-82-1, 117091-64-2, 3236-71-3, 80-05-7, 72-43-5, 15905-32-5, 2971-36-0, 115-39-9, 620-92-8, 77-40-7, 518-28-5, 79-94-7, 27072-45-3, 131-55-5, 77-09-8, 143-74-8, 33419-42-0, 79-95-8, 569-57-3, 603-50-9, 68047-06-3, 1260-17-9, 843-55-0	42	1449	5355	2.9	0	0	0
HTS_ACTIVE	counter screen (cell viability):tox21-ks-are-p1_viability_1	35	46.05	0	1478-61-1, 6807-17-6, 1565-94-2, 4162-45-2, 79-95-8, 33419-42-0, 79-97-0, 76-60-8, 52479-85-3, 27955-94-8, 13473-26-2, 139233-53-7, 1943-97-1, 143-74-8, 85-60-9, 115-39-9, 2971-36-0, 68047-06-3, 77-40-7, 1260-17-9, 4221-68-5, 843-55-0, 79-94-7, 14008-48-1, 517-28-2, 15905-32-5, 68392-35-8, 16423-68-0, 3236-71-3, 5613-46-7, 13080-86-9, 1571-75-1, 24038-68-4, 14868-03-2, 34487-61-1	68	1008	6512	3.33	0	0	0
MULTICASE_TOX_PREDICTION	OATP2B1 inhibition at 100uM	48	63.16	0	80-05-7, 16423-68-0, 3236-71-3, 117091-64-2, 34487-61-1, 611-99-4, 41351-30-8, 29767-20-2, 115-33-3, 518-28-5, 77-40-7, 620-92-8, 2971-36-0, 72-43-5, 14008-48-1, 517-28-2, 1943-97-1, 139233-53-7, 67227-56-9, 10040-45-6, 518-47-8, 2624-43-3, 126-00-1, 1565-94-2, 6807-17-6, 61445-50-9, 1478-61-1, 27955-94-8, 52479-85-3, 6559-91-7, 125-13-3, 31127-54-5, 131-54-4, 603-50-9, 569-57-3, 31477-60-8, 3810…	67	2433	7882	2.32	0	0	0
HTS_ACTIVE	counter screen (cell viability):tox21-er-luc-bg1-4e2-agonist-p4_viability_1	28	36.84	0	13080-86-9, 16423-68-0, 13473-26-2, 3236-71-3, 15086-94-9, 1943-97-1, 143-74-8, 603-50-9, 139233-53-7, 85-60-9, 24038-68-4, 34487-61-1, 1260-17-9, 61445-50-9, 115-39-9, 68047-06-3, 115-33-3, 1565-94-2, 4221-68-5, 15905-32-5, 125-13-3, 31127-54-5, 14008-48-1, 517-28-2, 4162-45-2, 79-97-0, 76-60-8, 52479-85-3	68	644	6512	4.16	0	0	0
TOXCAST_ACTIVE	NVS_NR_hER	14	18.42	0	27955-94-8, 79-94-7, 126-00-1, 143-74-8, 77-09-8, 68392-35-8, 81-90-3, 80-05-7, 77-40-7, 131-55-5, 72-43-5, 79-95-8, 1478-61-1, 2971-36-0	18	166	1694	7.94	0	0	0
HTS_ACTIVE	counter screen (cell viability):tox21-ar-mda-kb2-luc-antagonist-p2_viability_1	32	42.11	0	4221-68-5, 115-33-3, 115-39-9, 68047-06-3, 1260-17-9, 68392-35-8, 14008-48-1, 517-28-2, 15905-32-5, 603-50-9, 1571-75-1, 16423-68-0, 3236-71-3, 5613-46-7, 13080-86-9, 34487-61-1, 24038-68-4, 1565-94-2, 61445-50-9, 79-97-0, 76-60-8, 52479-85-3, 27955-94-8, 4162-45-2, 125-13-3, 31127-54-5, 139233-53-7, 15086-94-9, 1943-97-1, 143-74-8, 13473-26-2, 85-60-9	68	891	6512	3.44	0	0	0
HTS_STRONGACTIVE	sex hormone homeostasis:tox21-er-bla-antagonist-p1_er-antagonist_1	19	25	0	603-50-9, 77-09-8, 569-57-3, 1943-97-1, 843-55-0, 2971-36-0, 68047-06-3, 1478-61-1, 6807-17-6, 5613-46-7, 77-40-7, 80-05-7, 68392-35-8, 79-97-0, 27955-94-8, 29767-20-2, 4162-45-2, 33419-42-0, 14868-03-2	61	228	4870	6.65	0	0	0
MESH	Benzene Derivatives	24	31.58	0	2971-36-0, 68047-06-3, 620-92-8, 115-39-9, 77-40-7, 518-28-5, 79-94-7, 843-55-0, 80-05-7, 603-50-9, 569-57-3, 79-95-8, 6559-91-7, 52479-85-3, 76-60-8, 1478-61-1, 1565-94-2, 118-82-1, 85-60-9, 2624-43-3, 131-55-5, 77-09-8, 1943-97-1, 143-74-8	42	722	5355	4.24	0	0	0
HTS_ACTIVE	sex hormone homeostasis:tox21-er-bla-antagonist-p1_er-antagonist_1	25	32.89	0	569-57-3, 77-09-8, 603-50-9, 1943-97-1, 5613-46-7, 10040-45-6, 80-05-7, 29767-20-2, 14868-03-2, 843-55-0, 68047-06-3, 2971-36-0, 1478-61-1, 61445-50-9, 6807-17-6, 77-40-7, 68392-35-8, 52479-85-3, 79-97-0, 27955-94-8, 4162-45-2, 14008-48-1, 33419-42-0, 72-43-5, 125-13-3	68	528	6512	4.53	0	0	0
TOXCAST_ACTIVE	NVS_NR_bER	12	15.79	0	1478-61-1, 2971-36-0, 131-55-5, 77-40-7, 80-05-7, 81-90-3, 79-95-8, 77-09-8, 68392-35-8, 27955-94-8, 143-74-8, 126-00-1	18	100	1694	11.29	0	0	0
HTS_ACTIVE	counter screen (cell viability):tox21-shh-3t3-gli3-antagonist-p1_viability_1	35	46.05	0	52479-85-3, 79-97-0, 76-60-8, 27955-94-8, 33419-42-0, 31127-54-5, 125-13-3, 1565-94-2, 6807-17-6, 85-60-9, 139233-53-7, 143-74-8, 1943-97-1, 15086-94-9, 13473-26-2, 67227-56-9, 131-55-5, 68392-35-8, 517-28-2, 14008-48-1, 15905-32-5, 518-28-5, 4221-68-5, 843-55-0, 115-33-3, 68047-06-3, 115-39-9, 1260-17-9, 34487-61-1, 24038-68-4, 1571-75-1, 3236-71-3, 16423-68-0, 5613-46-7, 13080-86-9	68	1115	6512	3.01	0	0	0
HTS_ACTIVE	thyroid homeostasis:tox21-tshr-agonist-p1_tshr-agonist_1	24	31.58	0	2971-36-0, 68047-06-3, 1478-61-1, 6807-17-6, 77-40-7, 4221-68-5, 1565-94-2, 843-55-0, 4162-45-2, 79-95-8, 52479-85-3, 68392-35-8, 79-97-0, 27955-94-8, 3236-71-3, 13080-86-9, 5613-46-7, 80-05-7, 139233-53-7, 1943-97-1, 1571-75-1, 24038-68-4, 14868-03-2, 85-60-9	68	499	6512	4.61	0	0	0
HTS_ACTIVE	counter screen (cell viability):tox21-car-agonist-p1_viability_1	29	38.16	0	3236-71-3, 16423-68-0, 5613-46-7, 13080-86-9, 24038-68-4, 34487-61-1, 68047-06-3, 115-39-9, 1260-17-9, 518-28-5, 4221-68-5, 843-55-0, 517-28-2, 15905-32-5, 68392-35-8, 13473-26-2, 143-74-8, 1943-97-1, 15086-94-9, 85-60-9, 61445-50-9, 6807-17-6, 1565-94-2, 4162-45-2, 33419-42-0, 52479-85-3, 79-97-0, 76-60-8, 27955-94-8	68	759	6512	3.66	0	0	0
HTS_ACTIVE	xenobiotic homeostasis:tox21-p450-3a4-p1_3a4-inhibitor_1	43	56.58	0	77-40-7, 115-39-9, 620-92-8, 2971-36-0, 79-94-7, 518-28-5, 4221-68-5, 15905-32-5, 517-28-2, 80-05-7, 5613-46-7, 16423-68-0, 3236-71-3, 1571-75-1, 34487-61-1, 611-99-4, 61445-50-9, 6807-17-6, 1478-61-1, 125-13-3, 31127-54-5, 4162-45-2, 27955-94-8, 79-97-0, 76-60-8, 13473-26-2, 1943-97-1, 85-60-9, 1260-17-9, 68047-06-3, 843-55-0, 68392-35-8, 13080-86-9, 131-54-4, 603-50-9, 14868-03-2, 24038-68-4, 3…	68	1735	6512	2.37	0	0	0
HTS_ACTIVE	sex hormone homeostasis:tox21-ar-bla-antagonist-p1_ar-antagonist_1	28	36.84	0	1943-97-1, 77-09-8, 131-55-5, 1470-79-7, 61445-50-9, 6807-17-6, 22345-47-7, 30299-08-2, 27955-94-8, 79-97-0, 52479-85-3, 6559-91-7, 125-13-3, 33419-42-0, 4162-45-2, 603-50-9, 80-05-7, 5613-46-7, 117091-64-2, 14868-03-2, 29767-20-2, 843-55-0, 115-33-3, 518-28-5, 77-40-7, 620-92-8, 2971-36-0, 72-43-5	68	738	6512	3.63	0	0	0
PHARMACTIONLIST	Coloring Agents	10	13.16	0	2321-07-05, 13473-26-2, 517-28-2, 27072-45-3, 518-47-8, 115-39-9, 143-74-8, 71-67-0, 1260-17-9, 15905-32-5	27	57	2720	17.67	0	0	0
HTS_ACTIVE	cytotoxicity:tox21-rt-viability-hepg2-p1_viability@glo_24h_1	32	42.11	0	33419-42-0, 4162-45-2, 27955-94-8, 21850-44-2, 52479-85-3, 76-60-8, 79-97-0, 6807-17-6, 1478-61-1, 1565-94-2, 85-60-9, 13473-26-2, 518-47-8, 1943-97-1, 143-74-8, 15086-94-9, 139233-53-7, 72-43-5, 15905-32-5, 517-28-2, 68392-35-8, 1260-17-9, 68047-06-3, 115-39-9, 4221-68-5, 24038-68-4, 34487-61-1, 13080-86-9, 5613-46-7, 3236-71-3, 16423-68-0, 131-54-4	68	980	6512	3.13	0	0	0
HTS_ACTIVE	cytotoxicity:tox21-rt-viability-hek293-p1_viability@glo_32h_1	45	59.21	0	14868-03-2, 24038-68-4, 131-54-4, 569-57-3, 603-50-9, 13080-86-9, 68392-35-8, 843-55-0, 68047-06-3, 1470-79-7, 143-74-8, 33419-42-0, 611-99-4, 34487-61-1, 1571-75-1, 80-05-7, 5613-46-7, 16423-68-0, 3236-71-3, 15905-32-5, 72-43-5, 14008-48-1, 517-28-2, 79-94-7, 518-28-5, 4221-68-5, 77-40-7, 620-92-8, 2971-36-0, 85-60-9, 15086-94-9, 1943-97-1, 139233-53-7, 67227-56-9, 518-47-8, 13473-26-2, 27955-94…	68	1936	6512	2.23	0	0	0
HTS_ACTIVE	counter screen (cell viability):tox21-ror-cho-viability-p1_viability_1	27	35.53	0	4162-45-2, 79-97-0, 76-60-8, 6807-17-6, 1565-94-2, 85-60-9, 131-55-5, 13473-26-2, 1943-97-1, 139233-53-7, 15905-32-5, 72-43-5, 517-28-2, 68392-35-8, 1260-17-9, 115-39-9, 68047-06-3, 843-55-0, 79-94-7, 4221-68-5, 24038-68-4, 5613-46-7, 13080-86-9, 16423-68-0, 3236-71-3, 1571-75-1, 131-54-4	68	695	6512	3.72	0	0	0
MULTICASE_TOX_PREDICTION	Tox21 ARE activation assay, strong and weak actives by NIEHS calls, research only	46	60.53	0	611-99-4, 117091-64-2, 29767-20-2, 41351-30-8, 3236-71-3, 80-05-7, 5613-46-7, 14008-48-1, 517-28-2, 518-28-5, 115-33-3, 79-94-7, 620-92-8, 2971-36-0, 77-40-7, 85-60-9, 15086-94-9, 1943-97-1, 518-47-8, 13473-26-2, 2624-43-3, 79-97-0, 76-60-8, 6559-91-7, 27955-94-8, 4162-45-2, 125-13-3, 31127-54-5, 1565-94-2, 1478-61-1, 61445-50-9, 6807-17-6, 25327-89-3, 14868-03-2, 68392-35-8, 843-55-0, 68047-06-3…	67	2498	7882	2.17	0	0	0
HTS_ACTIVE	cytotoxicity:tox21-rt-viability-hek293-p1_viability@glo_24h_1	44	57.89	0	33419-42-0, 143-74-8, 843-55-0, 68047-06-3, 68392-35-8, 603-50-9, 569-57-3, 131-54-4, 13080-86-9, 24038-68-4, 14868-03-2, 1565-94-2, 118-82-1, 1478-61-1, 6807-17-6, 61445-50-9, 52479-85-3, 79-97-0, 27955-94-8, 4162-45-2, 139233-53-7, 1943-97-1, 15086-94-9, 13473-26-2, 518-47-8, 67227-56-9, 85-60-9, 4221-68-5, 518-28-5, 79-94-7, 2971-36-0, 620-92-8, 77-40-7, 517-28-2, 14008-48-1, 72-43-5, 15905-32…	68	1895	6512	2.22	0	0	0
HTS_ACTIVE	cytotoxicity:tox21-rt-viability-hepg2-p1_viability@glo_1	39	51.32	0	115-39-9, 4221-68-5, 517-28-2, 14008-48-1, 72-43-5, 15905-32-5, 3236-71-3, 16423-68-0, 5613-46-7, 1571-75-1, 34487-61-1, 1478-61-1, 6807-17-6, 1565-94-2, 4162-45-2, 125-13-3, 21850-44-2, 52479-85-3, 79-97-0, 76-60-8, 27955-94-8, 13473-26-2, 518-47-8, 139233-53-7, 1943-97-1, 15086-94-9, 85-60-9, 68047-06-3, 1260-17-9, 68392-35-8, 38103-06-9, 13080-86-9, 569-57-3, 603-50-9, 131-54-4, 24038-68-4, 33…	68	1506	6512	2.48	0	0	0
HTS_ACTIVE	cytotoxicity:tox21-rt-viability-hek293-p1_viability@glo_40h_1	45	59.21	0	1470-79-7, 143-74-8, 33419-42-0, 14868-03-2, 24038-68-4, 131-54-4, 603-50-9, 569-57-3, 13080-86-9, 68392-35-8, 843-55-0, 68047-06-3, 85-60-9, 1943-97-1, 15086-94-9, 139233-53-7, 67227-56-9, 13473-26-2, 518-47-8, 27955-94-8, 52479-85-3, 79-97-0, 76-60-8, 4162-45-2, 1565-94-2, 6807-17-6, 61445-50-9, 1478-61-1, 34487-61-1, 611-99-4, 1571-75-1, 5613-46-7, 80-05-7, 3236-71-3, 16423-68-0, 72-43-5, 1590…	68	1965	6512	2.19	0	0	0
HTS_STRONGACTIVE	sex hormone homeostasis:tox21-ar-bla-antagonist-p1_ar-antagonist_1	23	30.26	0	5613-46-7, 131-55-5, 80-05-7, 1943-97-1, 14868-03-2, 1470-79-7, 29767-20-2, 117091-64-2, 61445-50-9, 6807-17-6, 77-40-7, 2971-36-0, 843-55-0, 115-33-3, 518-28-5, 33419-42-0, 72-43-5, 125-13-3, 4162-45-2, 27955-94-8, 6559-91-7, 52479-85-3, 79-97-0	61	437	4870	4.2	0	0	0
TOXPRINT_STRUCTURE	ring:hetero_[6_6_6]_O_benzopyran_dibenzo[b_e]	6	7.89	0	27072-45-3, 15086-94-9, 13473-26-2, 518-47-8, 15905-32-5, 129-16-8	67	9	8195	81.54	0	0	0
HTS_ACTIVE	counter screen (cell viability):tox21-gh3-tre-antagonist-p1_viability_1	42	55.26	0	34487-61-1, 117091-64-2, 29767-20-2, 16423-68-0, 3236-71-3, 80-05-7, 5613-46-7, 14008-48-1, 517-28-2, 15905-32-5, 72-43-5, 518-28-5, 79-94-7, 115-39-9, 2971-36-0, 77-40-7, 85-60-9, 139233-53-7, 15086-94-9, 1943-97-1, 13473-26-2, 79-97-0, 76-60-8, 6559-91-7, 52479-85-3, 27955-94-8, 4162-45-2, 125-13-3, 31127-54-5, 1565-94-2, 1478-61-1, 61445-50-9, 6807-17-6, 569-57-3, 31477-60-8, 68392-35-8, 843-5…	68	1752	6512	2.3	0	0	0
HTS_STRONGACTIVE	xenobiotic homeostasis:tox21-car-antagonist-p1_car-antagonist_1	15	19.74	0	1943-97-1, 1571-75-1, 115-33-3, 27955-94-8, 843-55-0, 518-28-5, 603-50-9, 77-09-8, 6807-17-6, 33419-42-0, 125-13-3, 3236-71-3, 2624-43-3, 1478-61-1, 14008-48-1	61	160	4870	7.48	0	0	0
HTS_ACTIVE	autofluorescence:tox21-spec-hepg2-p1_autofluor@cell-red-n_1	10	13.16	0	1260-17-9, 15905-32-5, 34487-61-1, 15086-94-9, 129-16-8, 517-28-2, 13473-26-2, 16423-68-0, 518-47-8, 115-39-9	68	58	6512	16.51	0	0	0
MULTICASE_TOX_PREDICTION	Human plasma protein binding, %bound	54	71.05	0	68392-35-8, 25327-89-3, 22345-47-7, 33419-42-0, 27072-45-3, 143-74-8, 77-40-7, 115-39-9, 79-94-7, 15905-32-5, 5613-46-7, 3236-71-3, 29767-20-2, 34487-61-1, 61445-50-9, 6807-17-6, 1565-94-2, 125-13-3, 4162-45-2, 27955-94-8, 21850-44-2, 6559-91-7, 52479-85-3, 79-97-0, 13473-26-2, 1943-97-1, 15086-94-9, 126-00-1, 1260-17-9, 71-67-0, 68047-06-3, 843-55-0, 31477-60-8, 38103-06-9, 131-54-4, 79-95-8, 12…	67	3560	7882	1.78	0	0	0
HTS_ACTIVE	cytotoxicity:tox21-rt-viability-hepg2-p1_viability@glo_16h_1	31	40.79	0	13473-26-2, 518-47-8, 139233-53-7, 143-74-8, 15086-94-9, 85-60-9, 1478-61-1, 6807-17-6, 1565-94-2, 4162-45-2, 21850-44-2, 52479-85-3, 79-97-0, 76-60-8, 27955-94-8, 3236-71-3, 16423-68-0, 5613-46-7, 13080-86-9, 569-57-3, 131-54-4, 24038-68-4, 34487-61-1, 68047-06-3, 115-39-9, 1260-17-9, 4221-68-5, 517-28-2, 72-43-5, 15905-32-5, 68392-35-8	68	992	6512	2.99	0	0	0
MULTICASE_TOX_PREDICTION	ARE activation in keratinocytes at 1mM	52	68.42	0	80-05-7, 41351-30-8, 611-99-4, 620-92-8, 2971-36-0, 518-47-8, 67227-56-9, 139233-53-7, 85-60-9, 1478-61-1, 31127-54-5, 76-60-8, 131-54-4, 68047-06-3, 71-67-0, 1260-17-9, 843-55-0, 131-55-5, 77-09-8, 1470-79-7, 79-95-8, 125-31-5, 3236-71-3, 5613-46-7, 29767-20-2, 34487-61-1, 115-39-9, 77-40-7, 79-94-7, 517-28-2, 15905-32-5, 13473-26-2, 15086-94-9, 1943-97-1, 126-00-1, 6807-17-6, 61445-50-9, 1565-9…	67	3308	7882	1.85	0	0	0
HTS_ACTIVE	genotoxic stress:tox21-p53-bla-p4_p53-agonist_1	20	26.32	0	131-54-4, 77-09-8, 5613-46-7, 3236-71-3, 611-99-4, 117091-64-2, 1470-79-7, 29767-20-2, 115-33-3, 79-94-7, 1478-61-1, 2971-36-0, 27955-94-8, 79-97-0, 6559-91-7, 125-13-3, 33419-42-0, 79-95-8, 14008-48-1, 4162-45-2	68	397	6512	4.82	0	0	0
TOXPRINT_STRUCTURE	bond:CX_halide_aromatic-X_halo_phenol_ortho	13	17.11	0	76-60-8, 21850-44-2, 15905-32-5, 79-95-8, 25327-89-3, 4162-45-2, 15086-94-9, 79-94-7, 129-16-8, 67227-56-9, 16423-68-0, 115-39-9, 13473-26-2	67	173	8195	9.19	0	0	0
HTS_ACTIVE	counter screen (cell viability):tox21-ap1-agonist-p1_viability_1	24	31.58	0	125-13-3, 33419-42-0, 14008-48-1, 4162-45-2, 27955-94-8, 76-60-8, 68392-35-8, 6807-17-6, 115-39-9, 1478-61-1, 68047-06-3, 115-33-3, 843-55-0, 79-94-7, 4221-68-5, 85-60-9, 24038-68-4, 81-90-3, 5613-46-7, 3236-71-3, 13473-26-2, 1943-97-1, 1571-75-1, 603-50-9	68	603	6512	3.81	0	0	0
HTS_STRONGACTIVE	glucocorticoid homeostasis:tox21-gr-hela-bla-antagonist-p1_gr-antagonist_1	20	26.32	0	2971-36-0, 1478-61-1, 6807-17-6, 77-40-7, 79-94-7, 843-55-0, 14008-48-1, 72-43-5, 79-95-8, 125-13-3, 79-97-0, 27955-94-8, 3236-71-3, 518-47-8, 5613-46-7, 131-55-5, 80-05-7, 77-09-8, 1943-97-1, 14868-03-2	61	346	4870	4.61	0	0	0
TOXCAST_ACTIVE	OT_ER_ERaERa_1440	11	14.47	0	77-09-8, 68392-35-8, 27955-94-8, 126-00-1, 1478-61-1, 2971-36-0, 77-40-7, 131-55-5, 80-05-7, 72-43-5, 79-95-8	18	111	1694	9.33	0	0	0
PHARMACTIONLIST	Indicators and Reagents	10	13.16	0	15905-32-5, 71-67-0, 143-74-8, 77-09-8, 76-60-8, 115-39-9, 518-47-8, 13473-26-2, 27072-45-3, 2321-07-05	27	76	2720	13.26	0	0	0
HTS_STRONGACTIVE	sex hormone homeostasis:tox21-pr-bla-antagonist-p1_pr-antagonist_1	24	31.58	0	14868-03-2, 1470-79-7, 611-99-4, 13080-86-9, 5613-46-7, 80-05-7, 131-55-5, 2624-43-3, 1571-75-1, 131-54-4, 569-57-3, 72-43-5, 79-95-8, 4162-45-2, 27955-94-8, 79-97-0, 61445-50-9, 6807-17-6, 77-40-7, 2971-36-0, 1478-61-1, 79-94-7, 843-55-0, 518-28-5	61	519	4870	3.69	0	0	0
PHARMACTIONLIST	Laboratory Chemicals	10	13.16	0	15905-32-5, 71-67-0, 143-74-8, 76-60-8, 77-09-8, 115-39-9, 518-47-8, 13473-26-2, 27072-45-3, 2321-07-05	27	77	2720	13.08	0	0	0
HTS_ACTIVE	cytotoxicity:tox21-rt-viability-hek293-p1_viability@glo_1	49	64.47	0	33419-42-0, 1470-79-7, 143-74-8, 68392-35-8, 68047-06-3, 843-55-0, 14868-03-2, 24038-68-4, 13080-86-9, 131-54-4, 603-50-9, 569-57-3, 125-13-3, 4162-45-2, 27955-94-8, 52479-85-3, 21850-44-2, 79-97-0, 76-60-8, 6807-17-6, 61445-50-9, 1478-61-1, 118-82-1, 1565-94-2, 85-60-9, 67227-56-9, 13473-26-2, 518-47-8, 1943-97-1, 15086-94-9, 139233-53-7, 72-43-5, 15905-32-5, 517-28-2, 14008-48-1, 77-40-7, 2971-…	68	2449	6512	1.92	0	0	0
HTS_ACTIVE	sex hormone homeostasis:tox21-pr-bla-antagonist-p1_pr-antagonist_1	30	39.47	0	131-54-4, 1571-75-1, 569-57-3, 80-05-7, 5613-46-7, 13080-86-9, 16423-68-0, 611-99-4, 14868-03-2, 843-55-0, 79-94-7, 518-28-5, 77-40-7, 620-92-8, 2971-36-0, 72-43-5, 14008-48-1, 517-28-2, 77-09-8, 131-55-5, 2624-43-3, 1470-79-7, 61445-50-9, 6807-17-6, 1478-61-1, 27955-94-8, 79-97-0, 125-13-3, 79-95-8, 4162-45-2	68	964	6512	2.98	0	0	0
TOXPRINT_STRUCTURE	bond:COC_ether_aliphatic__aromatic	28	36.84	0	13473-26-2, 27072-45-3, 518-47-8, 129-16-8, 15086-94-9, 30299-08-2, 22345-47-7, 1565-94-2, 4162-45-2, 33419-42-0, 6559-91-7, 21850-44-2, 16423-68-0, 38103-06-9, 31477-60-8, 569-57-3, 131-54-4, 29767-20-2, 25327-89-3, 41351-30-8, 117091-64-2, 68047-06-3, 518-28-5, 517-28-2, 14008-48-1, 72-43-5, 15905-32-5, 68392-35-8	67	1075	8195	3.19	0	0	0
HTS_ACTIVE	glucocorticoid homeostasis:tox21-gr-hela-bla-antagonist-p1_gr-antagonist_1	26	34.21	0	1470-79-7, 518-47-8, 131-55-5, 77-09-8, 1943-97-1, 125-13-3, 31127-54-5, 79-95-8, 79-97-0, 27955-94-8, 22345-47-7, 1478-61-1, 6807-17-6, 61445-50-9, 14868-03-2, 3236-71-3, 80-05-7, 5613-46-7, 569-57-3, 14008-48-1, 72-43-5, 2971-36-0, 77-40-7, 115-33-3, 843-55-0, 79-94-7	68	725	6512	3.43	0	0	0
HTS_STRONGACTIVE	autofluorescence:tox21-spec-hek293-p1_autofluor@cell-red-n_1	9	11.84	0	115-39-9, 129-16-8, 15086-94-9, 16423-68-0, 15905-32-5, 518-47-8, 517-28-2, 13473-26-2, 1260-17-9	61	40	4870	17.96	0	0	0
HTS_ACTIVE	counter screen (cell viability):tox21-ahr-p1_viability_1	29	38.16	0	31477-60-8, 5613-46-7, 3236-71-3, 16423-68-0, 117091-64-2, 34487-61-1, 843-55-0, 1260-17-9, 2971-36-0, 68047-06-3, 115-39-9, 68392-35-8, 15905-32-5, 517-28-2, 1943-97-1, 143-74-8, 15086-94-9, 13473-26-2, 85-60-9, 6807-17-6, 61445-50-9, 27955-94-8, 52479-85-3, 6559-91-7, 76-60-8, 79-97-0, 31127-54-5, 125-13-3, 4162-45-2	68	908	6512	3.06	0	0	0
MULTICASE_TOX_PREDICTION	MRP4 substrates	3	3.95	0	6807-17-6, 126-00-1, 77-40-7	67	2411	7882	0.15	0	0	0
LEADSCOPE_TOXICITY	Genetic Toxicity: SCE in vitro CHO	13	17.11	0	517-28-2, 6559-91-7, 52479-85-3, 61445-50-9, 1565-94-2, 1260-17-9, 131-54-4, 1470-79-7, 131-55-5, 518-28-5, 41351-30-8, 611-99-4, 31127-54-5	66	3810	7259	0.38	0	0	0
HTS_ACTIVE	counter screen (cell viability):tox21-car-antagonist-p1_viability_1	29	38.16	0	27955-94-8, 76-60-8, 79-97-0, 52479-85-3, 33419-42-0, 31127-54-5, 4162-45-2, 1565-94-2, 61445-50-9, 85-60-9, 15086-94-9, 1943-97-1, 143-74-8, 13473-26-2, 68392-35-8, 15905-32-5, 517-28-2, 843-55-0, 518-28-5, 4221-68-5, 1260-17-9, 115-39-9, 68047-06-3, 34487-61-1, 24038-68-4, 13080-86-9, 5613-46-7, 16423-68-0, 3236-71-3	68	919	6512	3.02	0	0	0
TOXCAST_ACTIVE	NVS_NR_mERa	12	15.79	0	77-09-8, 68392-35-8, 27955-94-8, 143-74-8, 126-00-1, 79-94-7, 1478-61-1, 2971-36-0, 131-55-5, 77-40-7, 80-05-7, 79-95-8	18	158	1694	7.15	0	0	0
HTS_ACTIVE	autofluorescence:tox21-spec-hek293-p1_autofluor@med-red-n_1	10	13.16	0	15086-94-9, 129-16-8, 15905-32-5, 1260-17-9, 71-67-0, 115-39-9, 16423-68-0, 518-47-8, 517-28-2, 13473-26-2	68	72	6512	13.3	0.0001	0	0
HTS_ACTIVE	counter screen (cell viability):tox21-p53-bla-p1_viability_1	29	38.16	0	115-33-3, 843-55-0, 79-94-7, 115-39-9, 620-92-8, 2971-36-0, 68047-06-3, 68392-35-8, 603-50-9, 569-57-3, 31477-60-8, 5613-46-7, 3236-71-3, 14868-03-2, 29767-20-2, 118-82-1, 6807-17-6, 1478-61-1, 27955-94-8, 76-60-8, 79-97-0, 52479-85-3, 125-13-3, 79-95-8, 4162-45-2, 1943-97-1, 77-09-8, 13473-26-2, 85-60-9	68	938	6512	2.96	0.0001	0	0
LEADSCOPE_TOXICITY	Genetic Toxicity: chrom. ab. other rodent	20	26.32	0	5613-46-7, 81-90-3, 80-05-7, 518-47-8, 131-54-4, 41351-30-8, 126-00-1, 6807-17-6, 1260-17-9, 61445-50-9, 77-40-7, 2971-36-0, 1478-61-1, 620-92-8, 118-82-1, 72-43-5, 31127-54-5, 79-95-8, 27955-94-8, 79-97-0	66	502	7259	4.38	0.0001	0	0
MULTICASE_TOX_PREDICTION	Tox21 ARE activation assay, only strong actives by NIEHS calls, research only	38	50	0	2971-36-0, 620-92-8, 77-40-7, 518-28-5, 79-94-7, 14008-48-1, 72-43-5, 3236-71-3, 5613-46-7, 80-05-7, 29767-20-2, 117091-64-2, 1478-61-1, 6807-17-6, 31127-54-5, 125-13-3, 6559-91-7, 76-60-8, 79-97-0, 27955-94-8, 2624-43-3, 13473-26-2, 1943-97-1, 68047-06-3, 1260-17-9, 71-67-0, 843-55-0, 68392-35-8, 569-57-3, 25327-89-3, 14868-03-2, 33419-42-0, 79-95-8, 125-31-5, 27072-45-3, 131-55-5, 77-09-8, 1470…	67	1919	7882	2.33	0.0001	0	0
HTS_ACTIVE	counter screen (cell viability):tox21-er-luc-bg1-4e2-antagonist-p2_viability_1	22	28.95	0	27955-94-8, 52479-85-3, 76-60-8, 31127-54-5, 125-13-3, 15905-32-5, 517-28-2, 4221-68-5, 1565-94-2, 1260-17-9, 68047-06-3, 115-39-9, 34487-61-1, 85-60-9, 24038-68-4, 143-74-8, 15086-94-9, 139233-53-7, 603-50-9, 3236-71-3, 13473-26-2, 16423-68-0	68	538	6512	3.92	0.0001	0	0
HTS_STRONGACTIVE	autofluorescence:tox21-spec-hek293-p1_autofluor@med-red-n_1	9	11.84	0	1260-17-9, 15086-94-9, 129-16-8, 15905-32-5, 517-28-2, 13473-26-2, 115-39-9, 16423-68-0, 518-47-8	61	45	4870	15.97	0.0001	0	0
HTS_ACTIVE	genotoxic stress:tox21-p53-bla-p2_p53-agonist_1	23	30.26	0	79-95-8, 72-43-5, 33419-42-0, 125-13-3, 4162-45-2, 14008-48-1, 6559-91-7, 79-97-0, 77-40-7, 1478-61-1, 79-94-7, 115-33-3, 1565-94-2, 14868-03-2, 29767-20-2, 1470-79-7, 117091-64-2, 611-99-4, 5613-46-7, 80-05-7, 3236-71-3, 131-54-4, 603-50-9	68	596	6512	3.7	0.0001	0	0
MESH	Phenols	14	18.42	0	76-60-8, 79-95-8, 85-60-9, 1565-94-2, 77-09-8, 603-50-9, 118-82-1, 143-74-8, 2624-43-3, 2971-36-0, 115-39-9, 1478-61-1, 77-40-7, 80-05-7	42	271	5355	6.59	0.0001	0	0
TOXPRINT_STRUCTURE	ring:hetero_[5_6]_Z_generic	22	28.95	0	518-47-8, 13473-26-2, 27072-45-3, 129-16-8, 77-09-8, 15086-94-9, 143-74-8, 125-13-3, 33419-42-0, 76-60-8, 6559-91-7, 125-31-5, 29767-20-2, 117091-64-2, 34487-61-1, 38103-06-9, 517-28-2, 15905-32-5, 115-39-9, 71-67-0, 518-28-5, 115-33-3	67	698	8195	3.86	0.0001	0	0
HTS_STRONGACTIVE	counter screen (cell viability):tox21-er-luc-bg1-4e2-agonist-p4_viability_1	16	21.05	0	603-50-9, 143-74-8, 115-33-3, 15086-94-9, 13473-26-2, 3236-71-3, 16423-68-0, 115-39-9, 1260-17-9, 52479-85-3, 76-60-8, 34487-61-1, 517-28-2, 14008-48-1, 15905-32-5, 125-13-3	61	228	4870	5.6	0.0001	0	0
HTS_STRONGACTIVE	mitochondrial membrane permeability:tox21-mitotox-p1_mmp-inhibitor_1	26	34.21	0	31127-54-5, 72-43-5, 79-95-8, 4162-45-2, 27955-94-8, 6559-91-7, 52479-85-3, 79-97-0, 61445-50-9, 6807-17-6, 77-40-7, 2971-36-0, 1478-61-1, 79-94-7, 843-55-0, 115-33-3, 518-28-5, 1565-94-2, 14868-03-2, 85-60-9, 131-55-5, 80-05-7, 518-47-8, 131-54-4, 1943-97-1, 603-50-9	61	662	4870	3.14	0.0001	0	0
TOXCAST_ACTIVE	NVS_NR_rAR	11	14.47	0	16423-68-0, 115-39-9, 1478-61-1, 2971-36-0, 131-55-5, 77-40-7, 80-05-7, 79-95-8, 77-09-8, 68392-35-8, 79-94-7	18	132	1694	7.84	0.0001	0	0
HTS_ACTIVE	lipid homeostasis:tox21-pparg-bla-antagonist-p1_pparg-antagonist_1	22	28.95	0	14008-48-1, 125-13-3, 79-95-8, 79-97-0, 52479-85-3, 620-92-8, 2971-36-0, 77-40-7, 6807-17-6, 115-33-3, 843-55-0, 79-94-7, 1470-79-7, 14868-03-2, 611-99-4, 518-47-8, 2624-43-3, 80-05-7, 5613-46-7, 77-09-8, 15086-94-9, 131-54-4	68	555	6512	3.8	0.0001	0	0
HTS_ACTIVE	xenobiotic homeostasis:tox21-p450-2c9-p1_2c9-inhibitor_1	54	71.05	0	843-55-0, 68047-06-3, 1260-17-9, 603-50-9, 131-54-4, 79-95-8, 1470-79-7, 77-09-8, 131-55-5, 81-90-3, 14008-48-1, 518-28-5, 115-33-3, 2971-36-0, 611-99-4, 1571-75-1, 16423-68-0, 80-05-7, 76-60-8, 1478-61-1, 85-60-9, 139233-53-7, 518-47-8, 68392-35-8, 24038-68-4, 14868-03-2, 569-57-3, 13080-86-9, 33419-42-0, 143-74-8, 517-28-2, 15905-32-5, 72-43-5, 4221-68-5, 79-94-7, 115-39-9, 77-40-7, 34487-61-1,…	68	3041	6512	1.7	0.0002	0	0
TOXCAST_ACTIVE	NVS_NR_hGR	13	17.11	0	77-40-7, 131-55-5, 80-05-7, 81-90-3, 115-39-9, 1478-61-1, 16423-68-0, 2971-36-0, 79-94-7, 143-74-8, 77-09-8, 79-95-8, 68392-35-8	18	227	1694	5.39	0.0002	0	0
HTS_ACTIVE	counter screen (cell viability):tox21-ar-mda-kb2-luc-agonist-p3_viability_1	24	31.58	0	143-74-8, 15086-94-9, 3236-71-3, 13473-26-2, 16423-68-0, 13080-86-9, 5613-46-7, 34487-61-1, 24038-68-4, 85-60-9, 4221-68-5, 1565-94-2, 68047-06-3, 115-39-9, 1260-17-9, 61445-50-9, 52479-85-3, 68392-35-8, 76-60-8, 79-97-0, 4162-45-2, 517-28-2, 31127-54-5, 15905-32-5	68	670	6512	3.43	0.0002	0	0
HTS_ACTIVE	counter screen (cell viability):tox21-rar-viability-p1_viability_1	24	31.58	0	85-60-9, 14868-03-2, 34487-61-1, 5613-46-7, 16423-68-0, 3236-71-3, 13473-26-2, 15086-94-9, 1943-97-1, 15905-32-5, 33419-42-0, 79-95-8, 517-28-2, 27955-94-8, 76-60-8, 68392-35-8, 52479-85-3, 1260-17-9, 6807-17-6, 115-39-9, 68047-06-3, 843-55-0, 79-94-7, 1565-94-2	68	673	6512	3.42	0.0002	0	0
HTS_STRONGACTIVE	lipid homeostasis:tox21-pparg-bla-antagonist-p1_pparg-antagonist_1	18	23.68	0	77-40-7, 80-05-7, 6807-17-6, 5613-46-7, 518-47-8, 2971-36-0, 15086-94-9, 843-55-0, 79-94-7, 131-54-4, 77-09-8, 125-13-3, 79-95-8, 14868-03-2, 14008-48-1, 1470-79-7, 79-97-0, 52479-85-3	61	311	4870	4.62	0.0002	0	0
TOXCAST_ACTIVE	OT_ER_ERaERa_0480	11	14.47	0	1478-61-1, 2971-36-0, 80-05-7, 77-40-7, 131-55-5, 79-95-8, 72-43-5, 77-09-8, 68392-35-8, 27955-94-8, 126-00-1	18	138	1694	7.5	0.0002	0	0
HTS_ACTIVE	sex hormone homeostasis:tox21-er-luc-bg1-4e2-antagonist-p2_er-antagonist_1	25	32.89	0	14008-48-1, 68392-35-8, 68047-06-3, 2971-36-0, 77-40-7, 843-55-0, 115-33-3, 79-94-7, 24038-68-4, 14868-03-2, 80-05-7, 13080-86-9, 5613-46-7, 569-57-3, 603-50-9, 4162-45-2, 125-13-3, 33419-42-0, 79-95-8, 79-97-0, 1478-61-1, 61445-50-9, 6807-17-6, 2624-43-3, 1943-97-1	68	742	6512	3.23	0.0003	0	0
HTS_ACTIVE	development:tox21-sbe-bla-antagonist-p1_sbe-antagonist_1	25	32.89	0	13473-26-2, 131-55-5, 1470-79-7, 1478-61-1, 61445-50-9, 6807-17-6, 52479-85-3, 79-97-0, 27955-94-8, 79-95-8, 1571-75-1, 131-54-4, 5613-46-7, 13080-86-9, 80-05-7, 14868-03-2, 518-28-5, 79-94-7, 68047-06-3, 2971-36-0, 620-92-8, 77-40-7, 517-28-2, 14008-48-1, 72-43-5	68	746	6512	3.21	0.0003	0	0
HTS_ACTIVE	counter screen (cell viability):tox21-elg1-luc-agonist-p1_viability_1	27	35.53	0	34487-61-1, 31477-60-8, 16423-68-0, 3236-71-3, 15905-32-5, 14008-48-1, 517-28-2, 68392-35-8, 1260-17-9, 115-39-9, 68047-06-3, 843-55-0, 518-28-5, 85-60-9, 13473-26-2, 15086-94-9, 143-74-8, 1943-97-1, 31127-54-5, 4162-45-2, 76-60-8, 79-97-0, 6559-91-7, 52479-85-3, 61445-50-9, 6807-17-6, 1565-94-2	68	868	6512	2.98	0.0003	0	0
HTS_ACTIVE	thyroid homeostasis:tox21-trhr-hek293-p1_trhr-antagonist_1	17	22.37	0	79-94-7, 1571-75-1, 115-33-3, 15086-94-9, 843-55-0, 5613-46-7, 6807-17-6, 61445-50-9, 2971-36-0, 13473-26-2, 68047-06-3, 518-47-8, 1478-61-1, 68392-35-8, 79-97-0, 79-95-8, 14868-03-2	68	332	6512	4.9	0.0003	0	0
HTS_ACTIVE	cytotoxicity:tox21-rt-viability-hek293-p1_viability@glo_8h_1	39	51.32	0	843-55-0, 68047-06-3, 68392-35-8, 131-54-4, 569-57-3, 13080-86-9, 14868-03-2, 24038-68-4, 33419-42-0, 143-74-8, 4221-68-5, 77-40-7, 620-92-8, 2971-36-0, 15905-32-5, 72-43-5, 517-28-2, 1571-75-1, 80-05-7, 5613-46-7, 16423-68-0, 3236-71-3, 34487-61-1, 1565-94-2, 61445-50-9, 6807-17-6, 1478-61-1, 27955-94-8, 79-97-0, 76-60-8, 52479-85-3, 4162-45-2, 15086-94-9, 1943-97-1, 139233-53-7, 67227-56-9, 518…	68	1717	6512	2.18	0.0003	0	0
HTS_ACTIVE	counter screen (cell viability):tox21-aromatase-p1_viability_1	37	48.68	0	843-55-0, 1260-17-9, 68047-06-3, 68392-35-8, 31477-60-8, 14868-03-2, 79-95-8, 143-74-8, 79-94-7, 518-28-5, 77-40-7, 2971-36-0, 115-39-9, 15905-32-5, 517-28-2, 5613-46-7, 3236-71-3, 16423-68-0, 34487-61-1, 29767-20-2, 1565-94-2, 6807-17-6, 1478-61-1, 27955-94-8, 52479-85-3, 6559-91-7, 79-97-0, 76-60-8, 31127-54-5, 125-13-3, 4162-45-2, 1943-97-1, 15086-94-9, 67227-56-9, 129-16-8, 13473-26-2, 85-60-9	68	1570	6512	2.26	0.0003	0	0
LEADSCOPE_TOXICITY	Genetic Toxicity: micronucleus mouse	24	31.58	0	31127-54-5, 33419-42-0, 125-31-5, 6559-91-7, 52479-85-3, 61445-50-9, 1470-79-7, 129-16-8, 131-55-5, 518-47-8, 15086-94-9, 143-74-8, 15905-32-5, 517-28-2, 1260-17-9, 115-39-9, 518-28-5, 41351-30-8, 14868-03-2, 29767-20-2, 117091-64-2, 34487-61-1, 16423-68-0, 131-54-4	66	798	7259	3.31	0.0003	0	0
HTS_STRONGACTIVE	autofluorescence:tox21-spec-hepg2-p1_autofluor@med-red-n_1	9	11.84	0	13473-26-2, 517-28-2, 518-47-8, 16423-68-0, 115-39-9, 1260-17-9, 15905-32-5, 15086-94-9, 129-16-8	61	52	4870	13.82	0.0003	0	0
TOXPRINT_STRUCTURE	chain:alkaneBranch_neopentyl_C5	23	30.26	0	85-60-9, 126-00-1, 1943-97-1, 4162-45-2, 125-13-3, 79-95-8, 79-97-0, 21850-44-2, 27955-94-8, 30299-08-2, 1478-61-1, 6807-17-6, 1565-94-2, 118-82-1, 25327-89-3, 3236-71-3, 80-05-7, 5613-46-7, 38103-06-9, 77-40-7, 115-33-3, 843-55-0, 79-94-7	67	816	8195	3.45	0.0003	0	0
HTS_STRONGACTIVE	sex hormone homeostasis:tox21-er-luc-bg1-4e2-agonist-p2_er-agonist_1	20	26.32	0	131-54-4, 77-09-8, 67227-56-9, 5613-46-7, 80-05-7, 131-55-5, 611-99-4, 14868-03-2, 1470-79-7, 843-55-0, 6807-17-6, 61445-50-9, 77-40-7, 2971-36-0, 1478-61-1, 620-92-8, 27955-94-8, 79-97-0, 72-43-5, 31127-54-5	61	408	4870	3.91	0.0004	0	0
HTS_STRONGACTIVE	autofluorescence:tox21-spec-hek293-p1_autofluor@red_1	9	11.84	0	115-39-9, 16423-68-0, 518-47-8, 517-28-2, 13473-26-2, 15086-94-9, 129-16-8, 15905-32-5, 1260-17-9	61	53	4870	13.56	0.0004	0	0
HTS_ACTIVE	counter screen (cell viability):tox21-h2ax-cho-p2_viability_1	30	39.47	0	1260-17-9, 115-39-9, 2971-36-0, 68047-06-3, 843-55-0, 79-94-7, 4221-68-5, 15905-32-5, 72-43-5, 517-28-2, 68392-35-8, 13080-86-9, 5613-46-7, 16423-68-0, 3236-71-3, 1571-75-1, 14868-03-2, 24038-68-4, 34487-61-1, 6807-17-6, 1478-61-1, 1565-94-2, 4162-45-2, 27955-94-8, 76-60-8, 79-97-0, 13473-26-2, 15086-94-9, 1943-97-1, 85-60-9	68	1078	6512	2.67	0.0004	0	0
LEADSCOPE_TOXICITY	Reproductive Toxicity: repro mouse female	17	22.37	0	620-92-8, 1478-61-1, 68047-06-3, 2971-36-0, 77-40-7, 6807-17-6, 79-94-7, 79-95-8, 68392-35-8, 27955-94-8, 3236-71-3, 80-05-7, 569-57-3, 1943-97-1, 25327-89-3, 85-60-9, 14868-03-2	66	390	7259	4.79	0.0004	0	0
HTS_ACTIVE	cytotoxicity:tox21-rt-viability-hepg2-p1_viability@glo_32h_1	27	35.53	0	24038-68-4, 34487-61-1, 16423-68-0, 3236-71-3, 5613-46-7, 14008-48-1, 517-28-2, 15905-32-5, 72-43-5, 68392-35-8, 115-39-9, 68047-06-3, 1260-17-9, 4221-68-5, 85-60-9, 518-47-8, 13473-26-2, 139233-53-7, 15086-94-9, 143-74-8, 4162-45-2, 33419-42-0, 79-97-0, 52479-85-3, 27955-94-8, 1478-61-1, 1565-94-2	68	883	6512	2.93	0.0004	0	0
HTS_ACTIVE	counter screen (cell viability):tox21-p53-bla-p2_viability_1	26	34.21	0	603-50-9, 569-57-3, 31477-60-8, 5613-46-7, 3236-71-3, 14868-03-2, 29767-20-2, 115-33-3, 843-55-0, 79-94-7, 115-39-9, 2971-36-0, 68047-06-3, 68392-35-8, 1943-97-1, 13473-26-2, 85-60-9, 1565-94-2, 6807-17-6, 1478-61-1, 27955-94-8, 76-60-8, 79-97-0, 125-13-3, 79-95-8, 4162-45-2	68	822	6512	3.03	0.0004	0	0
HTS_STRONGACTIVE	genotoxic stress:tox21-p53-bla-p5_p53-agonist_1	16	21.05	0	5613-46-7, 1478-61-1, 3236-71-3, 115-33-3, 79-94-7, 603-50-9, 125-13-3, 79-95-8, 33419-42-0, 14008-48-1, 29767-20-2, 4162-45-2, 27955-94-8, 117091-64-2, 79-97-0, 6559-91-7	61	252	4870	5.07	0.0004	0	0
HTS_ACTIVE	autofluorescence:tox21-spec-hek293-p1_autofluor@cell-red-n_1	9	11.84	0	1260-17-9, 129-16-8, 15086-94-9, 15905-32-5, 517-28-2, 13473-26-2, 115-39-9, 16423-68-0, 518-47-8	68	64	6512	13.47	0.0005	0	0
HTS_ACTIVE	cytotoxicity:tox21-rt-viability-hepg2-p1_viability@glo_8h_1	28	36.84	0	72-43-5, 15905-32-5, 517-28-2, 68392-35-8, 68047-06-3, 115-39-9, 4221-68-5, 24038-68-4, 34487-61-1, 5613-46-7, 13080-86-9, 3236-71-3, 16423-68-0, 569-57-3, 4162-45-2, 27955-94-8, 52479-85-3, 79-97-0, 76-60-8, 6807-17-6, 1478-61-1, 1565-94-2, 85-60-9, 13473-26-2, 518-47-8, 143-74-8, 15086-94-9, 139233-53-7	68	952	6512	2.82	0.0005	0	0
HTS_ACTIVE	genotoxic stress:tox21-p53-bla-p5_p53-agonist_1	19	25	0	603-50-9, 3236-71-3, 5613-46-7, 117091-64-2, 29767-20-2, 115-33-3, 79-94-7, 1478-61-1, 2971-36-0, 77-40-7, 79-97-0, 6559-91-7, 27955-94-8, 14008-48-1, 4162-45-2, 125-13-3, 72-43-5, 79-95-8, 33419-42-0	68	438	6512	4.15	0.0005	0	0
HTS_ACTIVE	genotoxic stress:tox21-p53-bla-p1_p53-agonist_1	19	25	0	29767-20-2, 117091-64-2, 3236-71-3, 5613-46-7, 603-50-9, 131-54-4, 14008-48-1, 4162-45-2, 125-13-3, 72-43-5, 33419-42-0, 79-97-0, 6559-91-7, 27955-94-8, 1478-61-1, 2971-36-0, 77-40-7, 115-33-3, 79-94-7	68	439	6512	4.14	0.0005	0	0
HTS_ACTIVE	autofluorescence:tox21-spec-hek293-p1_autofluor@red_1	10	13.16	0	115-39-9, 518-47-8, 16423-68-0, 13473-26-2, 517-28-2, 129-16-8, 15905-32-5, 71-67-0, 1260-17-9, 15086-94-9	68	90	6512	10.64	0.0005	0	0
HTS_ACTIVE	genotoxic stress:tox21-p53-bla-p3_p53-agonist_1	20	26.32	0	117091-64-2, 29767-20-2, 131-54-4, 603-50-9, 5613-46-7, 3236-71-3, 27955-94-8, 6559-91-7, 79-97-0, 33419-42-0, 72-43-5, 79-95-8, 125-13-3, 4162-45-2, 14008-48-1, 79-94-7, 115-33-3, 1565-94-2, 77-40-7, 1478-61-1	68	492	6512	3.89	0.0005	0	0
HTS_STRONGACTIVE	xenobiotic homeostasis:tox21-p450-2c9-p1_2c9-inhibitor_1	43	56.58	0	6807-17-6, 1478-61-1, 1565-94-2, 125-13-3, 4162-45-2, 27955-94-8, 79-97-0, 76-60-8, 13473-26-2, 2624-43-3, 15086-94-9, 1943-97-1, 139233-53-7, 85-60-9, 77-40-7, 115-39-9, 2971-36-0, 115-33-3, 79-94-7, 4221-68-5, 518-28-5, 15905-32-5, 72-43-5, 14008-48-1, 517-28-2, 80-05-7, 5613-46-7, 16423-68-0, 3236-71-3, 1571-75-1, 34487-61-1, 79-95-8, 143-74-8, 77-09-8, 1260-17-9, 68047-06-3, 843-55-0, 13080-8…	61	1818	4870	1.89	0.0006	0	0
HTS_ACTIVE	thyroid homeostasis:tox21-trhr-hek293-p1_trhr-agonist_1	17	22.37	0	2971-36-0, 68047-06-3, 1478-61-1, 6807-17-6, 61445-50-9, 79-94-7, 843-55-0, 79-95-8, 15905-32-5, 68392-35-8, 79-97-0, 13473-26-2, 16423-68-0, 518-47-8, 5613-46-7, 15086-94-9, 14868-03-2	68	349	6512	4.66	0.0006	0	0
TOXCAST_ACTIVE	OT_ERa_EREGFP_0480	11	14.47	0	79-95-8, 72-43-5, 80-05-7, 77-40-7, 131-55-5, 2971-36-0, 1478-61-1, 126-00-1, 27955-94-8, 68392-35-8, 77-09-8	18	153	1694	6.77	0.0006	0	0
HTS_STRONGACTIVE	counter screen (cell viability):tox21-casp3-cho-p1_viability@cho-k1_1	27	35.53	0	33419-42-0, 4162-45-2, 79-97-0, 76-60-8, 52479-85-3, 61445-50-9, 1565-94-2, 85-60-9, 13473-26-2, 15086-94-9, 143-74-8, 1943-97-1, 15905-32-5, 517-28-2, 68392-35-8, 1260-17-9, 115-39-9, 68047-06-3, 2971-36-0, 518-28-5, 4221-68-5, 24038-68-4, 34487-61-1, 5613-46-7, 13080-86-9, 16423-68-0, 3236-71-3	61	773	4870	2.79	0.0007	0	0
HTS_ACTIVE	sex hormone homeostasis:tox21-er-bla-agonist-p2_er-agonist_1	17	22.37	0	1470-79-7, 611-99-4, 67227-56-9, 5613-46-7, 80-05-7, 131-55-5, 77-09-8, 131-54-4, 79-95-8, 72-43-5, 79-97-0, 1478-61-1, 620-92-8, 6807-17-6, 77-40-7, 79-94-7, 843-55-0	68	354	6512	4.6	0.0007	0	0
HTS_ACTIVE	mitochondrial membrane permeability:tox21-mitotox-p1_mmp-inhibitor_1	29	38.16	0	131-55-5, 518-47-8, 1943-97-1, 85-60-9, 6807-17-6, 61445-50-9, 1478-61-1, 1565-94-2, 125-13-3, 79-95-8, 31127-54-5, 4162-45-2, 27955-94-8, 79-97-0, 6559-91-7, 52479-85-3, 80-05-7, 131-54-4, 603-50-9, 14868-03-2, 77-40-7, 620-92-8, 2971-36-0, 115-33-3, 843-55-0, 79-94-7, 518-28-5, 72-43-5, 14008-48-1	68	1047	6512	2.65	0.0008	0.0001	0
HTS_STRONGACTIVE	autofluorescence:tox21-spec-hepg2-p1_autofluor@red_1	9	11.84	0	115-39-9, 16423-68-0, 518-47-8, 517-28-2, 13473-26-2, 129-16-8, 15086-94-9, 15905-32-5, 1260-17-9	61	59	4870	12.18	0.0009	0.0001	0
MULTICASE_TOX_PREDICTION	RCA survival pre-implantation, rodent	18	23.68	0	569-57-3, 603-50-9, 2624-43-3, 5613-46-7, 31477-60-8, 10040-45-6, 38103-06-9, 25327-89-3, 1565-94-2, 79-94-7, 115-33-3, 68047-06-3, 30299-08-2, 21850-44-2, 68392-35-8, 14008-48-1, 79-95-8, 72-43-5	67	500	7882	4.24	0.0009	0.0001	0
MESH	Benzhydryl Compounds	7	9.21	0	1943-97-1, 52479-85-3, 843-55-0, 620-92-8, 80-05-7, 131-55-5, 77-40-7	42	41	5355	21.77	0.001	0.0001	0
HTS_ACTIVE	autofluorescence:autofluor@med-green-n_1	12	15.79	0	67227-56-9, 15905-32-5, 129-16-8, 517-28-2, 13473-26-2, 16423-68-0, 518-47-8, 115-39-9, 143-74-8, 34487-61-1, 15086-94-9, 139233-53-7	68	164	6512	7.01	0.0014	0.0001	0
LEADSCOPE_TOXICITY	Genetic Toxicity: micronucleus rodent	22	28.95	0	52479-85-3, 6559-91-7, 125-31-5, 33419-42-0, 31127-54-5, 125-13-3, 61445-50-9, 1470-79-7, 143-74-8, 15086-94-9, 518-47-8, 131-55-5, 129-16-8, 517-28-2, 15905-32-5, 518-28-5, 115-39-9, 1260-17-9, 34487-61-1, 117091-64-2, 29767-20-2, 16423-68-0	66	733	7259	3.3	0.0015	0.0001	0
HTS_ACTIVE	xenobiotic homeostasis:tox21-car-antagonist-p1_car-antagonist_1	16	21.05	0	843-55-0, 115-33-3, 1571-75-1, 1943-97-1, 77-09-8, 603-50-9, 518-28-5, 81-90-3, 6807-17-6, 1478-61-1, 3236-71-3, 2624-43-3, 27955-94-8, 125-13-3, 33419-42-0, 14008-48-1	68	329	6512	4.66	0.0016	0.0001	0
HTS_STRONGACTIVE	counter screen (cell viability):tox21-er-luc-bg1-4e2-antagonist-p2_viability_1	13	17.11	0	1260-17-9, 115-39-9, 16423-68-0, 3236-71-3, 13473-26-2, 15086-94-9, 143-74-8, 603-50-9, 125-13-3, 15905-32-5, 517-28-2, 34487-61-1, 76-60-8	61	172	4870	6.03	0.0016	0.0001	0
HTS_STRONGACTIVE	autofluorescence:autofluor@med-red-n_1	9	11.84	0	16423-68-0, 518-47-8, 115-39-9, 517-28-2, 13473-26-2, 15905-32-5, 15086-94-9, 129-16-8, 1260-17-9	61	64	4870	11.23	0.0017	0.0001	0
HTS_STRONGACTIVE	autofluorescence:autofluor@med-red-n_2	9	11.84	0	13473-26-2, 517-28-2, 518-47-8, 16423-68-0, 115-39-9, 1260-17-9, 15905-32-5, 129-16-8, 15086-94-9	61	64	4870	11.23	0.0017	0.0001	0
TOXCAST_ACTIVE	OT_ER_ERaERb_0480	12	15.79	0	115-39-9, 1478-61-1, 2971-36-0, 80-05-7, 131-55-5, 77-40-7, 77-09-8, 79-95-8, 72-43-5, 68392-35-8, 27955-94-8, 126-00-1	18	221	1694	5.11	0.0018	0.0001	0
HTS_STRONGACTIVE	autofluorescence:tox21-spec-hepg2-p1_autofluor@cell-green_1	6	7.89	0	129-16-8, 13473-26-2, 15086-94-9, 518-47-8, 15905-32-5, 16423-68-0	61	16	4870	29.94	0.0019	0.0001	0
HTS_STRONGACTIVE	autofluorescence:tox21-spec-hepg2-p1_autofluor@med-green_1	6	7.89	0	13473-26-2, 15086-94-9, 129-16-8, 16423-68-0, 15905-32-5, 518-47-8	61	16	4870	29.94	0.0019	0.0001	0
HTS_STRONGACTIVE	sex hormone homeostasis:tox21-ar-mda-kb2-luc-antagonist-p2_ar-antagonist_1	21	27.63	0	2624-43-3, 5613-46-7, 80-05-7, 131-55-5, 569-57-3, 1943-97-1, 1571-75-1, 1470-79-7, 14868-03-2, 2971-36-0, 1478-61-1, 620-92-8, 6807-17-6, 61445-50-9, 77-40-7, 843-55-0, 4162-45-2, 14008-48-1, 72-43-5, 33419-42-0, 79-97-0	61	501	4870	3.35	0.002	0.0001	0
HTS_ACTIVE	counter screen (cell viability):tox21-nfkb-bla-agonist-p1_viability_1	19	25	0	85-60-9, 1943-97-1, 603-50-9, 5613-46-7, 3236-71-3, 27955-94-8, 68392-35-8, 76-60-8, 79-97-0, 33419-42-0, 125-13-3, 14008-48-1, 79-94-7, 115-33-3, 843-55-0, 1565-94-2, 6807-17-6, 68047-06-3, 115-39-9	68	483	6512	3.77	0.002	0.0001	0
LEADSCOPE_TOXICITY	Rodent Carcinogenicity: cell transformation	9	11.84	0	34487-61-1, 2624-43-3, 68392-35-8, 14868-03-2, 569-57-3, 143-74-8, 1260-17-9, 68047-06-3, 38103-06-9	66	2884	7259	0.34	0.0028	0.0002	0
HTS_ACTIVE	counter screen (cell viability):tox21-rar-viability-p2_viability_1	18	23.68	0	34487-61-1, 24038-68-4, 85-60-9, 1943-97-1, 15086-94-9, 13473-26-2, 3236-71-3, 16423-68-0, 5613-46-7, 68392-35-8, 76-60-8, 15905-32-5, 4221-68-5, 1565-94-2, 68047-06-3, 115-39-9, 6807-17-6, 1260-17-9	68	442	6512	3.9	0.0028	0.0002	0
TOXPRINT_STRUCTURE	ring:hetero_[6_6]_O_benzopyran	9	11.84	0	15086-94-9, 13473-26-2, 27072-45-3, 517-28-2, 518-47-8, 16423-68-0, 31477-60-8, 129-16-8, 15905-32-5	67	103	8195	10.69	0.0029	0.0002	0
MESH	Podophyllotoxin	4	5.26	0	33419-42-0, 518-28-5, 6559-91-7, 117091-64-2	42	4	5355	127.5	0.0033	0.0002	0
LEADSCOPE_TOXICITY	Developmental Toxicity: pre impl. loss rat	22	28.95	0	126-00-1, 85-60-9, 118-82-1, 6807-17-6, 22345-47-7, 1478-61-1, 27955-94-8, 6559-91-7, 21850-44-2, 4162-45-2, 569-57-3, 31477-60-8, 80-05-7, 25327-89-3, 518-28-5, 71-67-0, 77-40-7, 2971-36-0, 68047-06-3, 620-92-8, 68392-35-8, 72-43-5	66	769	7259	3.15	0.0033	0.0002	0
TOXCAST_ACTIVE	OT_ERa_EREGFP_0120	11	14.47	0	77-09-8, 1478-61-1, 2971-36-0, 80-05-7, 77-40-7, 131-55-5, 68392-35-8, 27955-94-8, 126-00-1, 79-95-8, 72-43-5	18	185	1694	5.6	0.0037	0.0002	0
MULTICASE_TOX_PREDICTION	Draize eye irritation test, rabbit	56	73.68	0	68047-06-3, 1260-17-9, 71-67-0, 843-55-0, 31477-60-8, 38103-06-9, 603-50-9, 79-95-8, 125-31-5, 81-90-3, 77-09-8, 14008-48-1, 2971-36-0, 115-33-3, 117091-64-2, 16423-68-0, 80-05-7, 76-60-8, 30299-08-2, 1478-61-1, 85-60-9, 518-47-8, 67227-56-9, 139233-53-7, 68392-35-8, 25327-89-3, 569-57-3, 33419-42-0, 27072-45-3, 143-74-8, 72-43-5, 15905-32-5, 115-39-9, 77-40-7, 79-94-7, 29767-20-2, 34487-61-1, 32…	67	4342	7882	1.52	0.0044	0.0003	0
HTS_ACTIVE	autofluorescence:tox21-spec-hepg2-p1_autofluor@med-green_1	6	7.89	0	129-16-8, 13473-26-2, 15086-94-9, 16423-68-0, 15905-32-5, 518-47-8	68	22	6512	26.12	0.0045	0.0003	0
TOXPRINT_STRUCTURE	bond:S(=O)O_sulfonicEster_alkyl_S-C	5	6.58	0	76-60-8, 125-31-5, 115-39-9, 34487-61-1, 143-74-8	67	13	8195	47.04	0.0051	0.0003	0
TOXPRINT_STRUCTURE	bond:S(=O)O_sulfonicEster_cyclic_S-(any_in_ring)	5	6.58	0	115-39-9, 34487-61-1, 143-74-8, 125-31-5, 76-60-8	67	13	8195	47.04	0.0051	0.0003	0
TOXPRINT_STRUCTURE	chain:alkaneLinear_ethyl_C2(H_gt_1)	9	11.84	0	68392-35-8, 22345-47-7, 77-40-7, 126-00-1, 4162-45-2, 31477-60-8, 68047-06-3, 85-60-9, 30299-08-2	67	3175	8195	0.35	0.0052	0.0003	0
HTS_ACTIVE	counter screen (cell viability):tox21-ms-p53-p2_viability_1	18	23.68	0	24038-68-4, 603-50-9, 1943-97-1, 1571-75-1, 3236-71-3, 5613-46-7, 76-60-8, 79-97-0, 27955-94-8, 4162-45-2, 79-95-8, 33419-42-0, 79-94-7, 843-55-0, 68047-06-3, 1478-61-1, 115-39-9, 6807-17-6	68	466	6512	3.7	0.0059	0.0003	0
HTS_STRONGACTIVE	sex hormone homeostasis:tox21-er-bla-agonist-p2_er-agonist_1	13	17.11	0	79-97-0, 611-99-4, 1470-79-7, 72-43-5, 77-09-8, 620-92-8, 1478-61-1, 5613-46-7, 67227-56-9, 6807-17-6, 77-40-7, 131-55-5, 80-05-7	61	195	4870	5.32	0.0062	0.0003	0
TOXCAST_ACTIVE	NVS_GPCR_hAdoRA1	8	10.53	0	77-09-8, 1478-61-1, 68392-35-8, 2971-36-0, 131-55-5, 77-40-7, 80-05-7, 72-43-5	18	74	1694	10.17	0.0062	0.0003	0
HTS_ACTIVE	cell viability:tox21-dt40-p1_viability@100_1	46	60.53	0	6807-17-6, 61445-50-9, 118-82-1, 1565-94-2, 31127-54-5, 125-13-3, 4162-45-2, 27955-94-8, 52479-85-3, 6559-91-7, 76-60-8, 79-97-0, 129-16-8, 1943-97-1, 139233-53-7, 85-60-9, 77-40-7, 2971-36-0, 620-92-8, 115-39-9, 79-94-7, 115-33-3, 518-28-5, 72-43-5, 15905-32-5, 517-28-2, 5613-46-7, 80-05-7, 3236-71-3, 16423-68-0, 29767-20-2, 117091-64-2, 611-99-4, 33419-42-0, 131-55-5, 77-09-8, 1470-79-7, 1260-1…	68	2530	6512	1.74	0.0064	0.0003	0
HTS_STRONGACTIVE	counter screen (cell viability):tox21-ks-are-p1_viability_1	19	25	0	13080-86-9, 3236-71-3, 13473-26-2, 16423-68-0, 1571-75-1, 1943-97-1, 143-74-8, 85-60-9, 24038-68-4, 34487-61-1, 6807-17-6, 68047-06-3, 115-39-9, 1478-61-1, 4221-68-5, 15905-32-5, 4162-45-2, 68392-35-8, 76-60-8	61	443	4870	3.42	0.0064	0.0003	0
HTS_ACTIVE	cytotoxicity:tox21-rt-viability-hek293-p1_viability@glo_16h_1	38	50	0	2971-36-0, 620-92-8, 77-40-7, 4221-68-5, 517-28-2, 72-43-5, 15905-32-5, 3236-71-3, 16423-68-0, 5613-46-7, 80-05-7, 1571-75-1, 34487-61-1, 1478-61-1, 6807-17-6, 61445-50-9, 1565-94-2, 4162-45-2, 52479-85-3, 79-97-0, 27955-94-8, 13473-26-2, 518-47-8, 67227-56-9, 139233-53-7, 1943-97-1, 15086-94-9, 85-60-9, 68047-06-3, 843-55-0, 68392-35-8, 13080-86-9, 569-57-3, 131-54-4, 24038-68-4, 14868-03-2, 334…	68	1829	6512	1.99	0.0064	0.0003	0
HTS_ACTIVE	cytotoxicity:tox21-rt-viability-hepg2-p1_viability@glo_40h_1	23	30.26	0	15905-32-5, 517-28-2, 68392-35-8, 1260-17-9, 68047-06-3, 115-39-9, 4221-68-5, 24038-68-4, 34487-61-1, 5613-46-7, 3236-71-3, 16423-68-0, 33419-42-0, 4162-45-2, 52479-85-3, 1478-61-1, 1565-94-2, 85-60-9, 13473-26-2, 518-47-8, 143-74-8, 15086-94-9, 139233-53-7	68	761	6512	2.89	0.0071	0.0004	0
HTS_STRONGACTIVE	cytotoxicity:tox21-rt-viability-hek293-p1_viability@glo_1	33	43.42	0	14868-03-2, 24038-68-4, 131-54-4, 603-50-9, 13080-86-9, 5613-46-7, 3236-71-3, 16423-68-0, 68392-35-8, 15905-32-5, 517-28-2, 4221-68-5, 518-28-5, 77-40-7, 2971-36-0, 68047-06-3, 620-92-8, 115-39-9, 85-60-9, 1943-97-1, 143-74-8, 15086-94-9, 139233-53-7, 13473-26-2, 27955-94-8, 76-60-8, 79-97-0, 33419-42-0, 125-13-3, 4162-45-2, 1565-94-2, 6807-17-6, 61445-50-9	61	1243	4870	2.12	0.0076	0.0004	0
HTS_STRONGACTIVE	autofluorescence:tox21-spec-hek293-p1_autofluor@med-green-n_1	8	10.53	0	15086-94-9, 129-16-8, 15905-32-5, 517-28-2, 13473-26-2, 16423-68-0, 139233-53-7, 518-47-8	61	55	4870	11.61	0.0076	0.0004	0
TOXPRINT_STRUCTURE	ring:hetero_[5]_O_oxolane	14	18.42	0	518-28-5, 71-67-0, 6559-91-7, 33419-42-0, 15905-32-5, 77-09-8, 15086-94-9, 27072-45-3, 13473-26-2, 518-47-8, 38103-06-9, 129-16-8, 117091-64-2, 29767-20-2	67	356	8195	4.81	0.0079	0.0004	0.0001
HTS_ACTIVE	counter screen (cell viability):tox21-p53-bla-p4_viability_1	27	35.53	0	13473-26-2, 1943-97-1, 85-60-9, 6807-17-6, 1478-61-1, 1565-94-2, 79-95-8, 125-13-3, 4162-45-2, 52479-85-3, 76-60-8, 31477-60-8, 5613-46-7, 3236-71-3, 569-57-3, 603-50-9, 14868-03-2, 29767-20-2, 77-40-7, 68047-06-3, 2971-36-0, 115-39-9, 79-94-7, 843-55-0, 115-33-3, 72-43-5, 68392-35-8	68	1027	6512	2.52	0.0079	0.0004	0.0001
HTS_STRONGACTIVE	counter screen (cell viability):tox21-er-luc-bg1-4e2-antagonist-p1_viability_1	15	19.74	0	143-74-8, 115-33-3, 15086-94-9, 603-50-9, 1260-17-9, 13473-26-2, 3236-71-3, 16423-68-0, 115-39-9, 34487-61-1, 76-60-8, 15905-32-5, 125-13-3, 29767-20-2, 517-28-2	61	276	4870	4.34	0.0082	0.0004	0.0001
HTS_STRONGACTIVE	autofluorescence:tox21-spec-hek293-p1_autofluor@cell-green-n_1	8	10.53	0	139233-53-7, 16423-68-0, 518-47-8, 517-28-2, 13473-26-2, 15905-32-5, 15086-94-9, 129-16-8	61	56	4870	11.41	0.0086	0.0004	0.0001
HTS_ACTIVE	autofluorescence:tox21-spec-hepg2-p1_autofluor@cell-green_1	6	7.89	0	518-47-8, 15905-32-5, 16423-68-0, 15086-94-9, 129-16-8, 13473-26-2	68	25	6512	22.98	0.0089	0.0005	0.0001
HTS_STRONGACTIVE	autofluorescence:tox21-spec-hepg2-p1_autofluor@cell-red-n_1	7	9.21	0	1260-17-9, 13473-26-2, 16423-68-0, 15905-32-5, 518-47-8, 129-16-8, 15086-94-9	61	37	4870	15.1	0.0092	0.0005	0.0001
TOXCAST_ACTIVE	OT_ER_ERaERb_1440	11	14.47	0	68392-35-8, 27955-94-8, 126-00-1, 79-95-8, 72-43-5, 77-09-8, 1478-61-1, 2971-36-0, 131-55-5, 77-40-7, 80-05-7	18	204	1694	5.07	0.0093	0.0005	0.0001
HTS_ACTIVE	autofluorescence:tox21-spec-hek293-p1_autofluor@med-red_1	5	6.58	0	129-16-8, 15086-94-9, 13473-26-2, 16423-68-0, 15905-32-5	68	12	6512	39.9	0.0094	0.0005	0.0001
HTS_ACTIVE	autofluorescence:tox21-spec-hepg2-p1_autofluor@med-red_1	5	6.58	0	15905-32-5, 16423-68-0, 13473-26-2, 15086-94-9, 129-16-8	68	12	6512	39.9	0.0094	0.0005	0.0001
HTS_ACTIVE	autofluorescence:tox21-spec-hek293-p1_autofluor@med-green-n_1	9	11.84	0	15086-94-9, 139233-53-7, 67227-56-9, 15905-32-5, 129-16-8, 517-28-2, 13473-26-2, 16423-68-0, 518-47-8	68	95	6512	9.07	0.0097	0.0005	0.0001
HTS_ACTIVE	counter screen (cell viability):tox21-ar-mda-kb2-luc-antagonist-p1_viability_1	21	27.63	0	1565-94-2, 843-55-0, 115-33-3, 115-39-9, 1260-17-9, 6807-17-6, 76-60-8, 68392-35-8, 52479-85-3, 4162-45-2, 517-28-2, 125-13-3, 15905-32-5, 603-50-9, 15086-94-9, 143-74-8, 16423-68-0, 3236-71-3, 13473-26-2, 34487-61-1, 85-60-9	68	661	6512	3.04	0.0116	0.0006	0.0001
HTS_ACTIVE	autofluorescence:autofluor@med-red-n_2	12	15.79	0	13473-26-2, 115-39-9, 518-47-8, 16423-68-0, 71-67-0, 67227-56-9, 1260-17-9, 129-16-8, 518-28-5, 15086-94-9, 517-28-2, 15905-32-5	68	204	6512	5.63	0.0118	0.0006	0.0001
HTS_ACTIVE	autofluorescence:tox21-spec-hek293-p1_autofluor@cell-red_1	5	6.58	0	16423-68-0, 15905-32-5, 13473-26-2, 15086-94-9, 129-16-8	68	13	6512	36.83	0.0135	0.0007	0.0001
HTS_ACTIVE	sex hormone homeostasis:tox21-er-luc-bg1-4e2-agonist-p2_er-agonist_1	22	28.95	0	27955-94-8, 79-97-0, 31127-54-5, 61445-50-9, 6807-17-6, 1478-61-1, 126-00-1, 1470-79-7, 77-09-8, 131-55-5, 67227-56-9, 72-43-5, 14008-48-1, 843-55-0, 77-40-7, 620-92-8, 2971-36-0, 611-99-4, 14868-03-2, 131-54-4, 80-05-7, 5613-46-7	68	729	6512	2.89	0.0137	0.0007	0.0001
TOXCAST_ACTIVE	OT_ER_ERbERb_0480	11	14.47	0	72-43-5, 68392-35-8, 126-00-1, 27955-94-8, 2971-36-0, 1478-61-1, 115-39-9, 80-05-7, 77-40-7, 131-55-5, 77-09-8	18	213	1694	4.86	0.014	0.0007	0.0001
MULTICASE_TOX_PREDICTION	NTCP substrates	25	32.89	0	79-94-7, 518-28-5, 71-67-0, 115-39-9, 131-54-4, 38103-06-9, 5613-46-7, 31477-60-8, 41351-30-8, 25327-89-3, 118-82-1, 1565-94-2, 61445-50-9, 22345-47-7, 52479-85-3, 6559-91-7, 21850-44-2, 79-97-0, 79-95-8, 4162-45-2, 139233-53-7, 131-55-5, 27072-45-3, 518-47-8, 1470-79-7	67	1136	7882	2.59	0.0143	0.0007	0.0001
HTS_STRONGACTIVE	autofluorescence:tox21-spec-hek293-p1_autofluor@green_1	8	10.53	0	517-28-2, 13473-26-2, 139233-53-7, 16423-68-0, 518-47-8, 15086-94-9, 129-16-8, 15905-32-5	61	61	4870	10.47	0.0154	0.0007	0.0001
MULTICASE_TOX_PREDICTION	BSEP inhibition at 100uM	47	61.84	0	38103-06-9, 31477-60-8, 603-50-9, 131-54-4, 68047-06-3, 71-67-0, 1260-17-9, 1470-79-7, 81-90-3, 131-55-5, 77-09-8, 79-95-8, 125-31-5, 41351-30-8, 611-99-4, 16423-68-0, 14008-48-1, 115-33-3, 85-60-9, 139233-53-7, 31127-54-5, 76-60-8, 25327-89-3, 14868-03-2, 569-57-3, 68392-35-8, 27072-45-3, 143-74-8, 22345-47-7, 34487-61-1, 3236-71-3, 5613-46-7, 517-28-2, 15905-32-5, 115-39-9, 79-94-7, 13473-26-2,…	67	3339	7882	1.66	0.0157	0.0007	0.0001
HTS_ACTIVE	autofluorescence:tox21-spec-hepg2-p1_autofluor@red_1	11	14.47	0	517-28-2, 15905-32-5, 34487-61-1, 13473-26-2, 518-47-8, 16423-68-0, 115-39-9, 67227-56-9, 1260-17-9, 129-16-8, 15086-94-9	68	171	6512	6.16	0.0161	0.0008	0.0001
HTS_STRONGACTIVE	genotoxic stress:tox21-p53-bla-p1_p53-agonist_1	14	18.42	0	603-50-9, 79-94-7, 115-33-3, 3236-71-3, 1478-61-1, 5613-46-7, 6559-91-7, 79-97-0, 117091-64-2, 27955-94-8, 29767-20-2, 14008-48-1, 33419-42-0, 125-13-3	61	255	4870	4.38	0.0183	0.0009	0.0001
HTS_STRONGACTIVE	autofluorescence:tox21-spec-hek293-p1_autofluor@med-green_1	5	6.58	0	15905-32-5, 518-47-8, 16423-68-0, 15086-94-9, 129-16-8	61	12	4870	33.27	0.0189	0.0009	0.0001
MULTICASE_TOX_PREDICTION	RCA fetal weight decrease, rodent	22	28.95	0	33419-42-0, 79-95-8, 4162-45-2, 79-97-0, 21850-44-2, 52479-85-3, 61445-50-9, 1565-94-2, 72-43-5, 517-28-2, 68392-35-8, 68047-06-3, 79-94-7, 41351-30-8, 25327-89-3, 117091-64-2, 80-05-7, 5613-46-7, 31477-60-8, 38103-06-9, 131-54-4, 569-57-3	67	916	7882	2.83	0.0194	0.0009	0.0001
HTS_ACTIVE	sex hormone homeostasis:tox21-ar-mda-kb2-luc-antagonist-p2_ar-antagonist_1	26	34.21	0	79-97-0, 4162-45-2, 79-95-8, 33419-42-0, 1478-61-1, 6807-17-6, 61445-50-9, 1470-79-7, 77-09-8, 1943-97-1, 2624-43-3, 131-55-5, 14008-48-1, 72-43-5, 79-94-7, 843-55-0, 2971-36-0, 620-92-8, 77-40-7, 611-99-4, 14868-03-2, 569-57-3, 1571-75-1, 131-54-4, 5613-46-7, 80-05-7	68	1010	6512	2.47	0.0202	0.0009	0.0001
TOXCAST_ACTIVE	Tox21_ERa_LUC_BG1_Agonist	12	15.79	0	72-43-5, 79-95-8, 126-00-1, 27955-94-8, 80-05-7, 77-40-7, 131-55-5, 2971-36-0, 1478-61-1, 143-74-8, 118-82-1, 77-09-8	18	282	1694	4	0.0216	0.001	0.0001
HTS_ACTIVE	counter screen (cell viability):tox21-p53-bla-p3_viability_1	26	34.21	0	29767-20-2, 3236-71-3, 31477-60-8, 5613-46-7, 603-50-9, 517-28-2, 68392-35-8, 68047-06-3, 115-39-9, 79-94-7, 843-55-0, 115-33-3, 85-60-9, 13473-26-2, 4162-45-2, 33419-42-0, 79-95-8, 125-13-3, 52479-85-3, 76-60-8, 27955-94-8, 1478-61-1, 61445-50-9, 6807-17-6, 1565-94-2, 118-82-1	68	1014	6512	2.46	0.0217	0.001	0.0001
HTS_ACTIVE	cell viability:tox21-dt40-p1_viability@657_1	44	57.89	0	27955-94-8, 52479-85-3, 6559-91-7, 76-60-8, 79-97-0, 31127-54-5, 125-13-3, 4162-45-2, 118-82-1, 1565-94-2, 61445-50-9, 6807-17-6, 1478-61-1, 85-60-9, 1943-97-1, 15086-94-9, 139233-53-7, 129-16-8, 72-43-5, 15905-32-5, 517-28-2, 79-94-7, 518-28-5, 77-40-7, 2971-36-0, 115-39-9, 620-92-8, 117091-64-2, 29767-20-2, 5613-46-7, 80-05-7, 3236-71-3, 16423-68-0, 33419-42-0, 77-09-8, 68392-35-8, 843-55-0, 12…	68	2452	6512	1.72	0.0221	0.001	0.0001
HTS_ACTIVE	counter screen (cell viability):tox21-ar-bla-antagonist-p1_viability_1	29	38.16	0	68047-06-3, 2971-36-0, 77-40-7, 518-28-5, 79-94-7, 843-55-0, 517-28-2, 72-43-5, 68392-35-8, 3236-71-3, 16423-68-0, 5613-46-7, 31477-60-8, 131-54-4, 29767-20-2, 117091-64-2, 1478-61-1, 61445-50-9, 6807-17-6, 1565-94-2, 4162-45-2, 33419-42-0, 79-95-8, 79-97-0, 76-60-8, 27955-94-8, 13473-26-2, 1943-97-1, 85-60-9	68	1230	6512	2.26	0.0243	0.0011	0.0001
HTS_STRONGACTIVE	counter screen (cell viability):tox21-casp3-hepg2-p1_viability@hepg2_1	16	21.05	0	4221-68-5, 1260-17-9, 115-39-9, 68047-06-3, 76-60-8, 52479-85-3, 15905-32-5, 517-28-2, 15086-94-9, 1943-97-1, 143-74-8, 16423-68-0, 13473-26-2, 34487-61-1, 85-60-9, 24038-68-4	61	347	4870	3.68	0.025	0.0011	0.0001
HTS_ACTIVE	autofluorescence:tox21-spec-hepg2-p1_autofluor@cell-red_1	5	6.58	0	16423-68-0, 15905-32-5, 129-16-8, 13473-26-2, 15086-94-9	68	15	6512	31.92	0.0253	0.0011	0.0001
HTS_ACTIVE	autofluorescence:autofluor@med-red-n_1	11	14.47	0	517-28-2, 15905-32-5, 15086-94-9, 13473-26-2, 16423-68-0, 518-47-8, 115-39-9, 1260-17-9, 67227-56-9, 71-67-0, 129-16-8	68	181	6512	5.82	0.0266	0.0012	0.0001
HTS_STRONGACTIVE	autofluorescence:autofluor@med-green-n_1	9	11.84	0	143-74-8, 15086-94-9, 139233-53-7, 129-16-8, 15905-32-5, 517-28-2, 13473-26-2, 16423-68-0, 518-47-8	61	92	4870	7.81	0.0269	0.0012	0.0001
HTS_STRONGACTIVE	autofluorescence:tox21-spec-hek293-p1_autofluor@cell-green_1	5	6.58	0	16423-68-0, 15905-32-5, 518-47-8, 129-16-8, 15086-94-9	61	13	4870	30.71	0.027	0.0012	0.0001
PHARMACTIONLIST	Fluorescent Dyes	5	6.58	0	518-47-8, 15905-32-5, 2321-07-05, 13473-26-2, 27072-45-3	27	17	2720	29.63	0.0283	0.0012	0.0002
CTD_CHEMICALS_GENES	ESR1	11	14.47	0	80-05-7, 131-55-5, 2971-36-0, 79-94-7, 77-09-8, 1565-94-2, 72-43-5, 79-95-8, 85-60-9, 29767-20-2, 68392-35-8	22	236	2273	4.82	0.03	0.0013	0.0002
HTS_STRONGACTIVE	genotoxic stress:tox21-p53-bla-p2_p53-agonist_1	16	21.05	0	14868-03-2, 29767-20-2, 117091-64-2, 5613-46-7, 3236-71-3, 603-50-9, 33419-42-0, 79-95-8, 125-13-3, 4162-45-2, 14008-48-1, 6559-91-7, 79-97-0, 1478-61-1, 79-94-7, 115-33-3	61	353	4870	3.62	0.0307	0.0013	0.0002
HTS_ACTIVE	autofluorescence:tox21-spec-hek293-p1_autofluor@green_1	9	11.84	0	67227-56-9, 15905-32-5, 129-16-8, 517-28-2, 13473-26-2, 16423-68-0, 518-47-8, 15086-94-9, 139233-53-7	68	111	6512	7.76	0.0308	0.0013	0.0002
HTS_ACTIVE	counter screen (cell viability):tox21-ppard-bla-agonist-p1_viability_1	28	36.84	0	3236-71-3, 16423-68-0, 5613-46-7, 14868-03-2, 518-28-5, 79-94-7, 843-55-0, 2971-36-0, 68047-06-3, 115-39-9, 620-92-8, 68392-35-8, 14008-48-1, 72-43-5, 1943-97-1, 2624-43-3, 13473-26-2, 85-60-9, 1565-94-2, 1478-61-1, 6807-17-6, 61445-50-9, 79-97-0, 76-60-8, 27955-94-8, 4162-45-2, 79-95-8, 33419-42-0	68	1170	6512	2.29	0.0311	0.0013	0.0002
HTS_ACTIVE	autofluorescence:tox21-spec-hepg2-p1_autofluor@med-green-n_1	10	13.16	0	129-16-8, 15905-32-5, 13473-26-2, 115-39-9, 16423-68-0, 518-47-8, 143-74-8, 34487-61-1, 15086-94-9, 139233-53-7	68	146	6512	6.56	0.0312	0.0013	0.0002
HTS_ACTIVE	counter screen (cell viability):tox21-er-luc-bg1-4e2-antagonist-p1_viability_1	25	32.89	0	1565-94-2, 61445-50-9, 52479-85-3, 76-60-8, 27955-94-8, 4162-45-2, 31127-54-5, 125-13-3, 143-74-8, 15086-94-9, 13473-26-2, 129-16-8, 85-60-9, 115-33-3, 68047-06-3, 115-39-9, 1260-17-9, 517-28-2, 15905-32-5, 603-50-9, 3236-71-3, 16423-68-0, 5613-46-7, 34487-61-1, 29767-20-2	68	966	6512	2.48	0.0312	0.0013	0.0002
HTS_ACTIVE	autofluorescence:tox21-spec-hek293-p1_autofluor@cell-green_1	5	6.58	0	15905-32-5, 518-47-8, 16423-68-0, 129-16-8, 15086-94-9	68	16	6512	29.93	0.0335	0.0014	0.0002
HTS_ACTIVE	autofluorescence:tox21-spec-hek293-p1_autofluor@med-green_1	5	6.58	0	15086-94-9, 129-16-8, 16423-68-0, 518-47-8, 15905-32-5	68	16	6512	29.93	0.0335	0.0014	0.0002
MULTICASE_TOX_PREDICTION	Local lymph node assay, mouse, weak sensitizers (EC3 < 100%)	54	71.05	0	569-57-3, 25327-89-3, 14868-03-2, 68392-35-8, 143-74-8, 27072-45-3, 33419-42-0, 5613-46-7, 34487-61-1, 29767-20-2, 79-94-7, 115-39-9, 77-40-7, 517-28-2, 15905-32-5, 15086-94-9, 1943-97-1, 2624-43-3, 13473-26-2, 10040-45-6, 126-00-1, 1565-94-2, 118-82-1, 6807-17-6, 61445-50-9, 79-97-0, 52479-85-3, 6559-91-7, 21850-44-2, 27955-94-8, 125-13-3, 38103-06-9, 843-55-0, 68047-06-3, 1260-17-9, 77-09-8, 13…	67	4322	7882	1.47	0.0346	0.0014	0.0002
LEADSCOPE_TOXICITY	Developmental Toxicity: retardation rat	23	30.26	0	21850-44-2, 79-97-0, 27955-94-8, 4162-45-2, 79-95-8, 118-82-1, 1478-61-1, 6807-17-6, 126-00-1, 85-60-9, 13473-26-2, 10040-45-6, 67227-56-9, 517-28-2, 79-94-7, 2971-36-0, 620-92-8, 71-67-0, 77-40-7, 25327-89-3, 603-50-9, 5613-46-7, 80-05-7	66	966	7259	2.62	0.0347	0.0014	0.0002
PHARMACTIONLIST	Luminescent Agents	5	6.58	0	27072-45-3, 13473-26-2, 518-47-8, 2321-07-05, 15905-32-5	27	18	2720	27.98	0.0362	0.0015	0.0002
HTS_ACTIVE	counter screen (cell viability):tox21-er-bla-antagonist-p1_viability_1	19	25	0	76-60-8, 68392-35-8, 4162-45-2, 79-95-8, 1565-94-2, 843-55-0, 79-94-7, 115-39-9, 1478-61-1, 2971-36-0, 68047-06-3, 6807-17-6, 85-60-9, 14868-03-2, 1943-97-1, 3236-71-3, 13473-26-2, 31477-60-8, 5613-46-7	68	592	6512	3.07	0.0367	0.0015	0.0002
HTS_STRONGACTIVE	counter screen (cell viability):tox21-p53-bla-p2_viability_1	14	18.42	0	79-94-7, 115-33-3, 603-50-9, 569-57-3, 5613-46-7, 6807-17-6, 3236-71-3, 68047-06-3, 13473-26-2, 27955-94-8, 79-95-8, 125-13-3, 85-60-9, 4162-45-2	61	272	4870	4.11	0.0368	0.0015	0.0002
TOXCAST_ACTIVE	OT_ER_ERbERb_1440	10	13.16	0	2971-36-0, 1478-61-1, 77-40-7, 131-55-5, 80-05-7, 77-09-8, 72-43-5, 68392-35-8, 126-00-1, 27955-94-8	18	184	1694	5.11	0.0386	0.0016	0.0002
TOXCAST_ACTIVE	Tox21_TR_LUC_GH3_Antagonist	14	18.42	0	77-09-8, 16423-68-0, 80-05-7, 131-55-5, 68392-35-8, 27955-94-8, 72-43-5, 79-95-8, 79-94-7, 2971-36-0, 1478-61-1, 115-39-9, 1260-17-9, 77-40-7	18	445	1694	2.96	0.0393	0.0016	0.0002
HTS_STRONGACTIVE	counter screen (cell viability):tox21-h2ax-cho-p2_viability_1	16	21.05	0	15905-32-5, 517-28-2, 76-60-8, 1260-17-9, 115-39-9, 68047-06-3, 1565-94-2, 4221-68-5, 85-60-9, 24038-68-4, 13080-86-9, 5613-46-7, 16423-68-0, 13473-26-2, 3236-71-3, 15086-94-9	61	363	4870	3.52	0.0429	0.0017	0.0002
HTS_ACTIVE	counter screen (cell viability):tox21-hdac-p1_viability_1	16	21.05	0	1260-17-9, 115-39-9, 68047-06-3, 115-33-3, 4221-68-5, 15905-32-5, 76-60-8, 16423-68-0, 3236-71-3, 13473-26-2, 15086-94-9, 139233-53-7, 569-57-3, 85-60-9, 24038-68-4, 34487-61-1	68	430	6512	3.56	0.0437	0.0017	0.0002
MULTICASE_TOX_PREDICTION	Human volume of distribution (L/kg)	12	15.79	0	71-67-0, 1260-17-9, 68047-06-3, 31477-60-8, 139233-53-7, 67227-56-9, 518-28-5, 22345-47-7, 68392-35-8, 1565-94-2, 6559-91-7, 13473-26-2	67	3276	7882	0.43	0.046	0.0018	0.0002
HTS_ACTIVE	counter screen (cell viability):tox21-cre-antagonist-p1_viability_1	19	25	0	68047-06-3, 6807-17-6, 4221-68-5, 1565-94-2, 79-94-7, 843-55-0, 4162-45-2, 72-43-5, 68392-35-8, 79-97-0, 76-60-8, 3236-71-3, 5613-46-7, 603-50-9, 131-54-4, 1571-75-1, 1943-97-1, 24038-68-4, 85-60-9	68	602	6512	3.02	0.0461	0.0018	0.0002
HTS_STRONGACTIVE	counter screen (cell viability):tox21-gh3-tre-antagonist-p1_viability_1	26	34.21	0	34487-61-1, 29767-20-2, 16423-68-0, 3236-71-3, 31477-60-8, 5613-46-7, 68392-35-8, 14008-48-1, 517-28-2, 15905-32-5, 72-43-5, 518-28-5, 843-55-0, 79-94-7, 68047-06-3, 1260-17-9, 85-60-9, 77-09-8, 15086-94-9, 1943-97-1, 13473-26-2, 76-60-8, 6559-91-7, 33419-42-0, 1478-61-1, 6807-17-6	61	892	4870	2.33	0.0495	0.002	0.0002
TOXPRINT_STRUCTURE	chain:aromaticAlkane_Ph-C1_acyclic_generic	39	51.32	0	1470-79-7, 81-90-3, 131-55-5, 125-31-5, 79-95-8, 14868-03-2, 25327-89-3, 131-54-4, 569-57-3, 603-50-9, 38103-06-9, 68392-35-8, 68047-06-3, 126-00-1, 85-60-9, 10040-45-6, 2624-43-3, 27955-94-8, 76-60-8, 79-97-0, 21850-44-2, 52479-85-3, 31127-54-5, 4162-45-2, 118-82-1, 1565-94-2, 61445-50-9, 6807-17-6, 1478-61-1, 611-99-4, 41351-30-8, 80-05-7, 5613-46-7, 16423-68-0, 72-43-5, 79-94-7, 77-40-7, 620-9…	67	2653	8195	1.8	0.0554	0.0022	0.0003
HTS_ACTIVE	autofluorescence:tox21-spec-hepg2-p1_autofluor@med-red-n_1	10	13.16	0	15086-94-9, 1260-17-9, 67227-56-9, 15905-32-5, 129-16-8, 517-28-2, 13473-26-2, 16423-68-0, 518-47-8, 115-39-9	68	157	6512	6.1	0.0558	0.0022	0.0003
HTS_ACTIVE	autofluorescence:tox21-spec-hepg2-p1_autofluor@green_1	11	14.47	0	34487-61-1, 15905-32-5, 1470-79-7, 15086-94-9, 143-74-8, 139233-53-7, 129-16-8, 16423-68-0, 518-47-8, 115-39-9, 13473-26-2	68	198	6512	5.32	0.0581	0.0023	0.0003
HTS_STRONGACTIVE	counter screen (cell viability):tox21-aromatase-p1_viability_1	23	30.26	0	843-55-0, 518-28-5, 1260-17-9, 115-39-9, 68047-06-3, 15905-32-5, 517-28-2, 31477-60-8, 16423-68-0, 34487-61-1, 29767-20-2, 1565-94-2, 6807-17-6, 1478-61-1, 79-97-0, 76-60-8, 6559-91-7, 52479-85-3, 15086-94-9, 143-74-8, 1943-97-1, 13473-26-2, 85-60-9	61	736	4870	2.49	0.0599	0.0023	0.0003
TOXPRINT_STRUCTURE	bond:CN_amine_aliphatic_generic	3	3.95	0	68047-06-3, 68392-35-8, 31477-60-8	67	1754	8195	0.21	0.0619	0.0024	0.0003
HTS_ACTIVE	cytotoxicity:tox21-rt-viability-hepg2-p1_viability@glo_0h_1	19	25	0	76-60-8, 27955-94-8, 517-28-2, 125-13-3, 15905-32-5, 4221-68-5, 115-39-9, 1478-61-1, 34487-61-1, 24038-68-4, 603-50-9, 1571-75-1, 143-74-8, 15086-94-9, 3236-71-3, 13473-26-2, 16423-68-0, 38103-06-9, 81-90-3	68	619	6512	2.94	0.0672	0.0026	0.0003
HTS_STRONGACTIVE	counter screen (cell viability):tox21-pxr-p1_viability_1	21	27.63	0	34487-61-1, 85-60-9, 24038-68-4, 15086-94-9, 143-74-8, 1943-97-1, 13080-86-9, 16423-68-0, 13473-26-2, 76-60-8, 79-97-0, 68392-35-8, 52479-85-3, 15905-32-5, 4162-45-2, 517-28-2, 518-28-5, 4221-68-5, 1260-17-9, 115-39-9, 68047-06-3	61	632	4870	2.65	0.0708	0.0027	0.0003
TOXPRINT_STRUCTURE	ring:hetero_[6]_O_pyran_generic	12	15.79	0	117091-64-2, 29767-20-2, 517-28-2, 33419-42-0, 15905-32-5, 15086-94-9, 13473-26-2, 27072-45-3, 518-47-8, 16423-68-0, 31477-60-8, 129-16-8	67	317	8195	4.63	0.0769	0.0029	0.0004
HTS_ACTIVE	cell viability:tox21-dt40-p1_viability@653_1	43	56.58	0	15086-94-9, 1943-97-1, 139233-53-7, 129-16-8, 13473-26-2, 85-60-9, 1565-94-2, 61445-50-9, 1478-61-1, 27955-94-8, 76-60-8, 79-97-0, 52479-85-3, 6559-91-7, 125-13-3, 31127-54-5, 4162-45-2, 80-05-7, 5613-46-7, 16423-68-0, 3236-71-3, 117091-64-2, 29767-20-2, 79-94-7, 518-28-5, 77-40-7, 115-39-9, 620-92-8, 2971-36-0, 15905-32-5, 72-43-5, 517-28-2, 77-09-8, 33419-42-0, 131-54-4, 569-57-3, 603-50-9, 314…	68	2467	6512	1.67	0.0779	0.0029	0.0004
HTS_STRONGACTIVE	genotoxic stress:tox21-p53-bla-p4_p53-agonist_1	13	17.11	0	115-33-3, 79-94-7, 5613-46-7, 1478-61-1, 3236-71-3, 2971-36-0, 117091-64-2, 6559-91-7, 125-13-3, 33419-42-0, 79-95-8, 14008-48-1, 29767-20-2	61	252	4870	4.12	0.0846	0.0032	0.0004
HTS_ACTIVE	counter screen (cell viability):tox21-gr-hela-bla-antagonist-p1_viability_1	21	27.63	0	85-60-9, 1943-97-1, 13473-26-2, 76-60-8, 6559-91-7, 27955-94-8, 4162-45-2, 1565-94-2, 6807-17-6, 3236-71-3, 5613-46-7, 31477-60-8, 68392-35-8, 14008-48-1, 72-43-5, 843-55-0, 79-94-7, 115-39-9, 68047-06-3, 2971-36-0, 77-40-7	68	758	6512	2.65	0.0894	0.0033	0.0004
TOXPRINT_STRUCTURE	bond:NC=O_aminocarbonyl_generic	3	3.95	0.0001	115-33-3, 14008-48-1, 125-13-3	67	1706	8195	0.22	0.0998	0.0037	0.0005
TOXPRINT_STRUCTURE	bond:C(=O)N_carboxamide_generic	3	3.95	0.0001	14008-48-1, 115-33-3, 125-13-3	67	1699	8195	0.22	0.101	0.0037	0.0005
HTS_ACTIVE	autofluorescence:tox21-spec-hek293-p1_autofluor@cell-green-n_1	8	10.53	0.0001	15086-94-9, 139233-53-7, 129-16-8, 15905-32-5, 16423-68-0, 518-47-8, 517-28-2, 13473-26-2	68	96	6512	7.98	0.1012	0.0037	0.0005
LEADSCOPE_TOXICITY	Developmental Toxicity: weight dec. rat	21	27.63	0.0001	72-43-5, 517-28-2, 77-40-7, 620-92-8, 2971-36-0, 25327-89-3, 80-05-7, 5613-46-7, 31477-60-8, 603-50-9, 125-13-3, 4162-45-2, 27955-94-8, 79-97-0, 6807-17-6, 1478-61-1, 118-82-1, 1565-94-2, 85-60-9, 126-00-1, 10040-45-6	66	884	7259	2.61	0.1071	0.0039	0.0005
MULTICASE_TOX_PREDICTION	Human oral bioavailability, F > 65% as actives	36	47.37	0.0001	15086-94-9, 518-47-8, 2624-43-3, 13473-26-2, 10040-45-6, 61445-50-9, 76-60-8, 52479-85-3, 6559-91-7, 125-13-3, 31127-54-5, 16423-68-0, 34487-61-1, 611-99-4, 41351-30-8, 518-28-5, 115-33-3, 115-39-9, 14008-48-1, 15905-32-5, 77-09-8, 143-74-8, 27072-45-3, 131-55-5, 1470-79-7, 22345-47-7, 125-31-5, 79-95-8, 569-57-3, 131-54-4, 38103-06-9, 14868-03-2, 68047-06-3, 1260-17-9, 71-67-0, 68392-35-8	67	2308	7882	1.83	0.1122	0.0041	0.0005
TOXPRINT_STRUCTURE	bond:CX_halide_aromatic-X_dihalo_benzene_(1_3-)	12	15.79	0.0001	71-67-0, 13473-26-2, 115-39-9, 16423-68-0, 79-94-7, 15086-94-9, 79-95-8, 15905-32-5, 4162-45-2, 25327-89-3, 21850-44-2, 76-60-8	67	331	8195	4.43	0.1141	0.0042	0.0005
LEADSCOPE_TOXICITY	Developmental Toxicity: weight dec. rodent	20	26.32	0.0001	79-97-0, 27955-94-8, 4162-45-2, 1565-94-2, 118-82-1, 1478-61-1, 6807-17-6, 126-00-1, 85-60-9, 139233-53-7, 10040-45-6, 517-28-2, 72-43-5, 2971-36-0, 620-92-8, 1260-17-9, 77-40-7, 603-50-9, 5613-46-7, 80-05-7	66	818	7259	2.69	0.1227	0.0045	0.0005
HTS_STRONGACTIVE	counter screen (cell viability):tox21-hre-bla-agonist-p1_viability_1	14	18.42	0.0001	33419-42-0, 85-60-9, 125-13-3, 24038-68-4, 76-60-8, 13080-86-9, 3236-71-3, 68047-06-3, 13473-26-2, 115-39-9, 1943-97-1, 115-33-3, 4221-68-5, 603-50-9	61	305	4870	3.66	0.1236	0.0045	0.0005
HTS_STRONGACTIVE	autofluorescence:tox21-spec-hepg2-p1_autofluor@green_1	9	11.84	0.0001	129-16-8, 15905-32-5, 16423-68-0, 518-47-8, 13473-26-2, 34487-61-1, 15086-94-9, 143-74-8, 139233-53-7	61	114	4870	6.3	0.1289	0.0046	0.0006
MESH	Tetrahydronaphthalenes	4	5.26	0.0001	33419-42-0, 518-28-5, 117091-64-2, 6559-91-7	42	11	5355	46.36	0.1299	0.0047	0.0006
HTS_STRONGACTIVE	xenobiotic homeostasis:tox21-pxr-p1_pxr-agonist_1	29	38.16	0.0001	79-97-0, 4162-45-2, 79-95-8, 1565-94-2, 1478-61-1, 61445-50-9, 6807-17-6, 1470-79-7, 85-60-9, 77-09-8, 1943-97-1, 72-43-5, 518-28-5, 4221-68-5, 79-94-7, 843-55-0, 68047-06-3, 2971-36-0, 620-92-8, 77-40-7, 24038-68-4, 14868-03-2, 569-57-3, 131-54-4, 1571-75-1, 3236-71-3, 5613-46-7, 13080-86-9, 80-05-7	61	1137	4870	2.04	0.1513	0.0054	0.0007
HTS_ACTIVE	counter screen (cell viability):tox21-ms-p53-p1_viability_1	16	21.05	0.0001	5613-46-7, 3236-71-3, 1943-97-1, 1571-75-1, 603-50-9, 24038-68-4, 6807-17-6, 115-39-9, 68047-06-3, 115-33-3, 79-94-7, 125-13-3, 79-95-8, 33419-42-0, 76-60-8, 68392-35-8	68	479	6512	3.2	0.1536	0.0055	0.0007
HTS_STRONGACTIVE	autofluorescence:tox21-spec-hepg2-p1_autofluor@med-green-n_1	8	10.53	0.0001	129-16-8, 15905-32-5, 518-47-8, 16423-68-0, 13473-26-2, 15086-94-9, 143-74-8, 139233-53-7	61	87	4870	7.34	0.161	0.0057	0.0007
HTS_STRONGACTIVE	counter screen (cell viability):tox21-ar-mda-kb2-luc-agonist-p3_viability_1	12	15.79	0.0001	1260-17-9, 13473-26-2, 16423-68-0, 115-39-9, 143-74-8, 15086-94-9, 4221-68-5, 1565-94-2, 15905-32-5, 85-60-9, 34487-61-1, 76-60-8	61	231	4870	4.15	0.1853	0.0065	0.0008
HTS_STRONGACTIVE	autofluorescence:tox21-spec-hek293-p1_autofluor@med-red_1	4	5.26	0.0001	13473-26-2, 15086-94-9, 15905-32-5, 16423-68-0	61	8	4870	39.92	0.188	0.0065	0.0008
HTS_STRONGACTIVE	autofluorescence:tox21-spec-hepg2-p1_autofluor@cell-red_1	4	5.26	0.0001	16423-68-0, 13473-26-2, 15086-94-9, 15905-32-5	61	8	4870	39.92	0.188	0.0065	0.0008
HTS_STRONGACTIVE	autofluorescence:tox21-spec-hepg2-p1_autofluor@med-red_1	4	5.26	0.0001	16423-68-0, 15086-94-9, 13473-26-2, 15905-32-5	61	8	4870	39.92	0.188	0.0065	0.0008
HTS_STRONGACTIVE	counter screen (cell viability):tox21-ar-mda-kb2-luc-antagonist-p2_viability_1	15	19.74	0.0001	115-39-9, 1260-17-9, 1565-94-2, 115-33-3, 15905-32-5, 125-13-3, 76-60-8, 16423-68-0, 13473-26-2, 3236-71-3, 603-50-9, 15086-94-9, 143-74-8, 85-60-9, 34487-61-1	61	365	4870	3.28	0.1949	0.0067	0.0008
HTS_STRONGACTIVE	counter screen (cell viability):tox21-shh-3t3-gli3-agonist-p1_viability_1	18	23.68	0.0001	24038-68-4, 85-60-9, 34487-61-1, 3236-71-3, 13473-26-2, 16423-68-0, 143-74-8, 517-28-2, 31127-54-5, 125-13-3, 15905-32-5, 52479-85-3, 68392-35-8, 76-60-8, 68047-06-3, 115-39-9, 1260-17-9, 4221-68-5	61	520	4870	2.76	0.2234	0.0077	0.0009
MESH	Cresols	5	6.58	0.0001	76-60-8, 85-60-9, 603-50-9, 118-82-1, 2624-43-3	42	34	5355	18.75	0.2292	0.0079	0.001
STRUCTURE_ACTIVITY	DNA topoisomerase II inhibitor	3	3.95	0.0001	117091-64-2, 33419-42-0, 29767-20-2	7	4	1210	129.64	0.2416	0.0083	0.001
TOXCAST_ACTIVE	BSK_BE3C_IP10_down	10	13.16	0.0001	77-09-8, 79-94-7, 2971-36-0, 1478-61-1, 81-90-3, 77-40-7, 131-55-5, 68392-35-8, 27955-94-8, 72-43-5	18	231	1694	4.07	0.2492	0.0085	0.001
TOXPRINT_STRUCTURE	bond:COC_ether_aromatic	7	9.21	0.0001	38103-06-9, 129-16-8, 15905-32-5, 27072-45-3, 13473-26-2, 518-47-8, 15086-94-9	67	98	8195	8.74	0.2518	0.0085	0.001
HTS_STRONGACTIVE	counter screen (cell viability):tox21-pgc-err-p1_viability_1	16	21.05	0.0001	16423-68-0, 13473-26-2, 15086-94-9, 143-74-8, 85-60-9, 24038-68-4, 34487-61-1, 1260-17-9, 115-39-9, 68047-06-3, 1565-94-2, 518-28-5, 4221-68-5, 15905-32-5, 4162-45-2, 76-60-8	61	425	4870	3.01	0.2691	0.0091	0.0011
TOXCAST_ACTIVE	NVS_NR_hPR	7	9.21	0.0001	79-94-7, 68392-35-8, 77-40-7, 131-55-5, 80-05-7, 1478-61-1, 2971-36-0	18	89	1694	7.4	0.2718	0.0091	0.0011
HTS_STRONGACTIVE	autofluorescence:tox21-spec-hek293-p1_autofluor@cell-red_1	4	5.26	0.0001	13473-26-2, 15086-94-9, 15905-32-5, 16423-68-0	61	9	4870	35.48	0.2795	0.0094	0.0011
PHARMACTIONLIST	Pharmacologic Actions	16	21.05	0.0002	68392-35-8, 68047-06-3, 2321-07-05, 603-50-9, 569-57-3, 22345-47-7, 518-28-5, 115-33-3, 29767-20-2, 117091-64-2, 80-05-7, 125-13-3, 2624-43-3, 518-47-8, 67227-56-9, 10040-45-6	27	2375	2720	0.68	0.3019	0.0101	0.0012
TOXCAST_ACTIVE	BSK_BE3C_HLADR_down	10	13.16	0.0002	131-55-5, 77-40-7, 81-90-3, 2971-36-0, 1478-61-1, 79-94-7, 77-09-8, 72-43-5, 27955-94-8, 68392-35-8	18	240	1694	3.92	0.3387	0.0112	0.0014
HTS_STRONGACTIVE	xenobiotic homeostasis:tox21-p450-2c19-p1_2c19-inhibitor_1	41	53.95	0.0002	14868-03-2, 24038-68-4, 131-54-4, 603-50-9, 569-57-3, 13080-86-9, 843-55-0, 1260-17-9, 68047-06-3, 77-09-8, 131-55-5, 79-95-8, 611-99-4, 1571-75-1, 5613-46-7, 3236-71-3, 16423-68-0, 72-43-5, 15905-32-5, 14008-48-1, 79-94-7, 115-33-3, 4221-68-5, 518-28-5, 2971-36-0, 115-39-9, 85-60-9, 1943-97-1, 2624-43-3, 518-47-8, 27955-94-8, 52479-85-3, 79-97-0, 76-60-8, 31127-54-5, 125-13-3, 4162-45-2, 1565-94…	61	2058	4870	1.59	0.3498	0.0116	0.0014
HTS_ACTIVE	cytotoxicity:tox21-rt-viability-hek293-p1_viability@glo_0h_1	17	22.37	0.0002	125-13-3, 15905-32-5, 27955-94-8, 21850-44-2, 76-60-8, 6807-17-6, 115-39-9, 4221-68-5, 24038-68-4, 3236-71-3, 13473-26-2, 16423-68-0, 518-47-8, 143-74-8, 1571-75-1, 15086-94-9, 603-50-9	68	578	6512	2.82	0.3661	0.0121	0.0015
HTS_ACTIVE	counter screen (cell viability):tox21-fxr-bla-agonist-p2_viability_1	22	28.95	0.0002	4162-45-2, 79-95-8, 76-60-8, 79-97-0, 27955-94-8, 6807-17-6, 1565-94-2, 85-60-9, 13473-26-2, 1943-97-1, 14008-48-1, 68392-35-8, 115-39-9, 620-92-8, 68047-06-3, 843-55-0, 79-94-7, 14868-03-2, 16423-68-0, 3236-71-3, 5613-46-7, 603-50-9	68	886	6512	2.38	0.3685	0.0121	0.0015
HTS_ACTIVE	bile acid homeostasis:tox21-fxr-bla-antagonist-p1_fxr-antagonist_1	14	18.42	0.0002	79-95-8, 72-43-5, 125-13-3, 4162-45-2, 14008-48-1, 27955-94-8, 61445-50-9, 2971-36-0, 79-94-7, 518-28-5, 611-99-4, 131-54-4, 569-57-3, 77-09-8	68	403	6512	3.33	0.3742	0.0122	0.0015
HTS_ACTIVE	counter screen (cell viability):tox21-pparg-bla-antagonist-p1_viability_1	22	28.95	0.0002	85-60-9, 13473-26-2, 1943-97-1, 79-95-8, 125-13-3, 4162-45-2, 27955-94-8, 79-97-0, 6807-17-6, 1478-61-1, 1565-94-2, 14868-03-2, 5613-46-7, 3236-71-3, 131-54-4, 72-43-5, 68392-35-8, 68047-06-3, 2971-36-0, 115-39-9, 79-94-7, 843-55-0	68	889	6512	2.37	0.3781	0.0123	0.0015
TOXCAST_ACTIVE	NVS_GPCR_h5HT6	6	7.89	0.0002	68392-35-8, 2971-36-0, 1478-61-1, 77-40-7, 131-55-5, 80-05-7	18	59	1694	9.57	0.3825	0.0124	0.0015
HTS_STRONGACTIVE	counter screen (cell viability):tox21-err-p1_viability_1	16	21.05	0.0002	15905-32-5, 76-60-8, 115-39-9, 68047-06-3, 1260-17-9, 1565-94-2, 4221-68-5, 518-28-5, 24038-68-4, 85-60-9, 34487-61-1, 16423-68-0, 13473-26-2, 5613-46-7, 15086-94-9, 143-74-8	61	439	4870	2.91	0.3873	0.0125	0.0015
HTS_STRONGACTIVE	autofluorescence:tox21-spec-hepg2-p1_autofluor@cell-green-n_1	8	10.53	0.0002	143-74-8, 34487-61-1, 15086-94-9, 15905-32-5, 129-16-8, 13473-26-2, 16423-68-0, 518-47-8	61	100	4870	6.39	0.3893	0.0125	0.0015
TOXCAST_ACTIVE	Tox21_PPARd_BLA_antagonist_ratio	8	10.53	0.0002	27955-94-8, 79-94-7, 77-09-8, 80-05-7, 77-40-7, 16423-68-0, 1478-61-1, 2971-36-0	18	138	1694	5.46	0.3928	0.0126	0.0015
LEADSCOPE_TOXICITY	Developmental Toxicity: structural rabbit	18	23.68	0.0002	2624-43-3, 77-09-8, 139233-53-7, 85-60-9, 125-13-3, 33419-42-0, 79-97-0, 6559-91-7, 31477-60-8, 5613-46-7, 569-57-3, 603-50-9, 34487-61-1, 1260-17-9, 68047-06-3, 518-28-5, 517-28-2, 68392-35-8	66	742	7259	2.67	0.3969	0.0127	0.0016
HTS_ACTIVE	apoptosis:tox21-casp3-hepg2-p1_casp3-activator_1	15	19.74	0.0002	85-60-9, 24038-68-4, 5613-46-7, 3236-71-3, 1943-97-1, 1571-75-1, 33419-42-0, 4162-45-2, 79-97-0, 68392-35-8, 6807-17-6, 68047-06-3, 843-55-0, 79-94-7, 4221-68-5	68	465	6512	3.09	0.4222	0.0134	0.0016
HTS_STRONGACTIVE	genotoxic stress:tox21-p53-bla-p3_p53-agonist_1	13	17.11	0.0002	6559-91-7, 117091-64-2, 4162-45-2, 29767-20-2, 14008-48-1, 33419-42-0, 79-95-8, 125-13-3, 603-50-9, 79-94-7, 115-33-3, 3236-71-3, 5613-46-7	61	298	4870	3.48	0.4269	0.0135	0.0017
HTS_ACTIVE	xenobiotic homeostasis:tox21-car-agonist-p1_car-agonist_1	25	32.89	0.0002	77-40-7, 620-92-8, 2971-36-0, 843-55-0, 72-43-5, 80-05-7, 13080-86-9, 5613-46-7, 1571-75-1, 131-54-4, 603-50-9, 14868-03-2, 24038-68-4, 611-99-4, 61445-50-9, 6807-17-6, 1478-61-1, 1565-94-2, 31127-54-5, 4162-45-2, 79-97-0, 131-55-5, 2624-43-3, 77-09-8, 1470-79-7	68	1119	6512	2.14	0.448	0.0141	0.0017
CTD_CHEMICALS_GOENRICH_MOLFUNCT	GO:0004879|nuclear receptor activity	7	9.21	0.0002	518-28-5, 68392-35-8, 79-94-7, 2971-36-0, 79-95-8, 72-43-5, 33419-42-0	14	87	1090	6.26	0.4684	0.0147	0.0018
TOXCAST_ACTIVE	ATG_ERa_TRANS_up	13	17.11	0.0002	77-40-7, 1478-61-1, 2971-36-0, 79-94-7, 72-43-5, 79-95-8, 27955-94-8, 81-90-3, 131-55-5, 80-05-7, 143-74-8, 77-09-8, 126-00-1	18	465	1694	2.63	0.4845	0.0152	0.0019
TOXCAST_ACTIVE	ACEA_T47D_80hr_Positive	11	14.47	0.0003	79-95-8, 72-43-5, 27955-94-8, 126-00-1, 1478-61-1, 2971-36-0, 77-40-7, 131-55-5, 80-05-7, 77-09-8, 143-74-8	18	316	1694	3.28	0.4942	0.0154	0.0019
HTS_ACTIVE	counter screen (cell viability):tox21-esre-bla-p1_viability_1	19	25	0.0003	1565-94-2, 6807-17-6, 1478-61-1, 76-60-8, 79-97-0, 79-95-8, 33419-42-0, 4162-45-2, 1943-97-1, 13473-26-2, 85-60-9, 843-55-0, 79-94-7, 115-39-9, 68047-06-3, 68392-35-8, 131-54-4, 3236-71-3, 14868-03-2	68	723	6512	2.52	0.5081	0.0158	0.0019
CTD_CHEMICALS_GOENRICH_MOLFUNCT	GO:0098531|transcription factor activity, direct ligand regulated sequence-specific DNA binding	7	9.21	0.0003	79-94-7, 518-28-5, 68392-35-8, 33419-42-0, 79-95-8, 72-43-5, 2971-36-0	14	89	1090	6.12	0.5328	0.0165	0.002
HTS_STRONGACTIVE	counter screen (cell viability):tox21-shh-3t3-gli3-antagonist-p1_viability_1	15	19.74	0.0003	115-39-9, 68047-06-3, 1260-17-9, 518-28-5, 4221-68-5, 517-28-2, 15905-32-5, 76-60-8, 16423-68-0, 13473-26-2, 15086-94-9, 143-74-8, 24038-68-4, 85-60-9, 34487-61-1	61	402	4870	2.98	0.5451	0.0168	0.0021
HTS_STRONGACTIVE	counter screen (cell viability):tox21-p53-bla-p3_viability_1	13	17.11	0.0003	5613-46-7, 115-39-9, 3236-71-3, 13473-26-2, 68047-06-3, 115-33-3, 79-94-7, 118-82-1, 603-50-9, 85-60-9, 125-13-3, 27955-94-8, 76-60-8	61	306	4870	3.39	0.547	0.0168	0.0021
HTS_STRONGACTIVE	counter screen (cell viability):tox21-hdac-p1_viability_1	8	10.53	0.0003	76-60-8, 15086-94-9, 115-33-3, 115-39-9, 16423-68-0, 13473-26-2, 15905-32-5, 1260-17-9	61	106	4870	6.03	0.5595	0.0171	0.0021
TOXCAST_ACTIVE	Tox21_GR_BLA_Antagonist_ratio	8	10.53	0.0003	77-09-8, 79-94-7, 27955-94-8, 2971-36-0, 1478-61-1, 79-95-8, 77-40-7, 80-05-7	18	146	1694	5.16	0.5624	0.0171	0.0021
HTS_ACTIVE	counter screen (cell viability):tox21-sbe-bla-agonist-p1_viability_1	18	23.68	0.0003	76-60-8, 68392-35-8, 4162-45-2, 72-43-5, 1565-94-2, 4221-68-5, 843-55-0, 115-39-9, 68047-06-3, 6807-17-6, 24038-68-4, 85-60-9, 603-50-9, 569-57-3, 1943-97-1, 3236-71-3, 13473-26-2, 5613-46-7	68	666	6512	2.59	0.5877	0.0178	0.0022
HTS_STRONGACTIVE	miscellaneous stress:tox21-ap1-agonist-p1_ap1-agonist_1	14	18.42	0.0003	125-13-3, 27955-94-8, 68392-35-8, 6807-17-6, 68047-06-3, 1478-61-1, 79-94-7, 843-55-0, 115-33-3, 518-28-5, 5613-46-7, 3236-71-3, 1571-75-1, 603-50-9	61	356	4870	3.14	0.5926	0.0179	0.0022
HTS_ACTIVE	xenobiotic homeostasis:tox21-p450-2c19-p1_2c19-inhibitor_1	49	64.47	0.0003	843-55-0, 68047-06-3, 1260-17-9, 603-50-9, 131-54-4, 79-95-8, 77-09-8, 131-55-5, 518-28-5, 115-33-3, 2971-36-0, 14008-48-1, 1571-75-1, 16423-68-0, 611-99-4, 1478-61-1, 76-60-8, 31127-54-5, 139233-53-7, 518-47-8, 85-60-9, 569-57-3, 13080-86-9, 24038-68-4, 14868-03-2, 33419-42-0, 4221-68-5, 79-94-7, 115-39-9, 517-28-2, 72-43-5, 15905-32-5, 3236-71-3, 5613-46-7, 34487-61-1, 1565-94-2, 118-82-1, 6807…	68	3218	6512	1.46	0.5945	0.0179	0.0022
HTS_ACTIVE	autofluorescence:tox21-spec-hepg2-p1_autofluor@cell-green-n_1	9	11.84	0.0003	143-74-8, 15086-94-9, 34487-61-1, 129-16-8, 15905-32-5, 13473-26-2, 1470-79-7, 518-47-8, 16423-68-0	68	169	6512	5.1	0.6084	0.0183	0.0022
TOXCAST_ACTIVE	NVS_NR_cAR	9	11.84	0.0003	68392-35-8, 27955-94-8, 16423-68-0, 1478-61-1, 115-39-9, 2971-36-0, 80-05-7, 131-55-5, 77-40-7	18	200	1694	4.24	0.6134	0.0183	0.0022
CTD_CHEMICALS_GOENRICH_MOLFUNCT	GO:0005488|binding	5	6.58	0.0003	79-95-8, 143-74-8, 67227-56-9, 2971-36-0, 29767-20-2	14	850	1090	0.46	0.6497	0.0194	0.0024
HTS_ACTIVE	counter screen (cell viability):tox21-are-bla-p1_viability_1	19	25	0.0004	68392-35-8, 115-39-9, 2971-36-0, 68047-06-3, 843-55-0, 79-94-7, 14868-03-2, 3236-71-3, 5613-46-7, 4162-45-2, 79-95-8, 76-60-8, 79-97-0, 27955-94-8, 6807-17-6, 1565-94-2, 85-60-9, 13473-26-2, 1943-97-1	68	742	6512	2.45	0.7024	0.0209	0.0026
HTS_ACTIVE	miscellaneous stress:tox21-ap1-agonist-p1_ap1-agonist_1	19	25	0.0004	79-95-8, 33419-42-0, 125-13-3, 27955-94-8, 1478-61-1, 6807-17-6, 68392-35-8, 68047-06-3, 77-40-7, 518-28-5, 79-94-7, 115-33-3, 843-55-0, 3236-71-3, 16423-68-0, 5613-46-7, 603-50-9, 1571-75-1, 131-54-4	68	744	6512	2.45	0.7262	0.0215	0.0026
HTS_ACTIVE	counter screen (cell viability):tox21-hre-bla-agonist-p1_viability_1	21	27.63	0.0004	125-13-3, 33419-42-0, 4162-45-2, 76-60-8, 1565-94-2, 85-60-9, 13473-26-2, 1943-97-1, 68392-35-8, 115-39-9, 68047-06-3, 115-33-3, 843-55-0, 79-94-7, 4221-68-5, 24038-68-4, 5613-46-7, 13080-86-9, 3236-71-3, 1571-75-1, 603-50-9	68	870	6512	2.31	0.7416	0.0219	0.0027
HTS_ACTIVE	cytotoxicity:tox21-rt-viability-hepg2-p1_viability@flor_24h_1	21	27.63	0.0004	1478-61-1, 6807-17-6, 118-82-1, 33419-42-0, 13473-26-2, 518-47-8, 139233-53-7, 15086-94-9, 85-60-9, 68047-06-3, 115-39-9, 4221-68-5, 79-94-7, 14008-48-1, 15905-32-5, 68392-35-8, 3236-71-3, 16423-68-0, 5613-46-7, 1571-75-1, 24038-68-4	68	874	6512	2.3	0.775	0.0228	0.0028
HTS_ACTIVE	counter screen (cell viability):tox21-p53-bla-p5_viability_1	20	26.32	0.0004	85-60-9, 13473-26-2, 4162-45-2, 125-13-3, 76-60-8, 27955-94-8, 6807-17-6, 1565-94-2, 29767-20-2, 3236-71-3, 5613-46-7, 31477-60-8, 569-57-3, 68392-35-8, 115-39-9, 2971-36-0, 68047-06-3, 115-33-3, 843-55-0, 79-94-7	68	793	6512	2.42	0.8506	0.0249	0.003
PHARMACTIONLIST	Cathartics	4	5.26	0.0005	125-13-3, 115-33-3, 603-50-9, 10040-45-6	27	17	2720	23.7	0.952	0.0278	0.0034
TOXPRINT_STRUCTURE	chain:alkaneLinear_propyl_C3	6	7.89	0.0005	68392-35-8, 68047-06-3, 30299-08-2, 85-60-9, 126-00-1, 77-40-7	67	2068	8195	0.35	0.9793	0.0285	0.0035
PHARMACTIONLIST	Molecular Mechanisms of Pharmacological Action	4	5.26	0.0005	518-28-5, 80-05-7, 29767-20-2, 67227-56-9	27	1196	2720	0.34	1	0.0306	0.0037
TOXCAST_ACTIVE	NVS_NR_hAR	7	9.21	0.0005	27955-94-8, 68392-35-8, 131-55-5, 77-40-7, 80-05-7, 2971-36-0, 1478-61-1	18	114	1694	5.78	1	0.0311	0.0038
HTS_STRONGACTIVE	xenobiotic homeostasis:tox21-car-agonist-p1_car-agonist_1	17	22.37	0.0006	1571-75-1, 131-54-4, 77-09-8, 603-50-9, 13080-86-9, 5613-46-7, 80-05-7, 14868-03-2, 1470-79-7, 24038-68-4, 843-55-0, 6807-17-6, 77-40-7, 2971-36-0, 1478-61-1, 79-97-0, 72-43-5	61	537	4870	2.53	1	0.0315	0.0039
HTS_ACTIVE	neurotransmission:tox21-ache-p5_ache-inhibitor_1	15	19.74	0.0006	68392-35-8, 27955-94-8, 79-95-8, 843-55-0, 79-94-7, 68047-06-3, 6807-17-6, 611-99-4, 24038-68-4, 14868-03-2, 139233-53-7, 1943-97-1, 1571-75-1, 3236-71-3, 13473-26-2	68	513	6512	2.8	1	0.0332	0.0041
HTS_ACTIVE	lipid homeostasis:tox21-ppard-bla-antagonist-p1_ppard-antagonist_1	8	10.53	0.0006	77-09-8, 27955-94-8, 611-99-4, 15086-94-9, 518-47-8, 80-05-7, 77-40-7, 14868-03-2	68	142	6512	5.4	1	0.0332	0.0041
HTS_ACTIVE	sex hormone homeostasis:tox21-ar-mda-kb2-luc-antagonist-p1_ar-antagonist_1	18	23.68	0.0006	61445-50-9, 1478-61-1, 33419-42-0, 125-13-3, 27955-94-8, 79-97-0, 5613-46-7, 80-05-7, 3236-71-3, 131-54-4, 603-50-9, 14868-03-2, 29767-20-2, 77-40-7, 2971-36-0, 79-94-7, 115-33-3, 72-43-5	68	707	6512	2.44	1	0.0338	0.0041
HTS_STRONGACTIVE	counter screen (cell viability):tox21-elg1-luc-agonist-p1_viability_1	12	15.79	0.0006	518-28-5, 15086-94-9, 143-74-8, 16423-68-0, 115-39-9, 13473-26-2, 1260-17-9, 76-60-8, 6559-91-7, 34487-61-1, 15905-32-5, 85-60-9	61	286	4870	3.35	1	0.0341	0.0042
HTS_STRONGACTIVE	counter screen (cell viability):tox21-ap1-agonist-p1_viability_1	10	13.16	0.0006	68047-06-3, 3236-71-3, 115-33-3, 603-50-9, 125-13-3, 85-60-9, 24038-68-4, 14008-48-1, 27955-94-8, 76-60-8	61	198	4870	4.03	1	0.0344	0.0042
CTD_CHEMICALS_GENES	THRB	5	6.58	0.0006	80-05-7, 131-55-5, 79-95-8, 79-94-7, 29767-20-2	22	45	2273	11.48	1	0.0349	0.0043
HTS_ACTIVE	counter screen (cell viability):tox21-pr-bla-antagonist-p1_viability_1	23	30.26	0.0006	68392-35-8, 68047-06-3, 115-39-9, 4221-68-5, 79-94-7, 843-55-0, 24038-68-4, 14868-03-2, 3236-71-3, 5613-46-7, 13080-86-9, 1571-75-1, 4162-45-2, 33419-42-0, 79-97-0, 76-60-8, 27955-94-8, 1478-61-1, 6807-17-6, 1565-94-2, 85-60-9, 13473-26-2, 1943-97-1	68	1050	6512	2.1	1	0.0351	0.0043
HTS_ACTIVE	cytotoxicity:tox21-rt-viability-hepg2-p1_viability@flor_16h_1	19	25	0.0007	5613-46-7, 16423-68-0, 3236-71-3, 1571-75-1, 24038-68-4, 68047-06-3, 4221-68-5, 15905-32-5, 68392-35-8, 518-47-8, 13473-26-2, 15086-94-9, 139233-53-7, 85-60-9, 61445-50-9, 6807-17-6, 1478-61-1, 118-82-1, 33419-42-0	68	762	6512	2.39	1	0.0397	0.0049
LEADSCOPE_TOXICITY	Human Adverse Cardiological Effects: myocardial	14	18.42	0.0007	6559-91-7, 68392-35-8, 4162-45-2, 79-95-8, 518-28-5, 68047-06-3, 115-39-9, 1478-61-1, 1260-17-9, 71-67-0, 41351-30-8, 603-50-9, 131-54-4, 31477-60-8	66	532	7259	2.89	1	0.0397	0.0049
MESH	Polycyclic Hydrocarbons, Aromatic	9	11.84	0.0008	518-47-8, 3236-71-3, 13473-26-2, 1260-17-9, 518-28-5, 15905-32-5, 33419-42-0, 6559-91-7, 117091-64-2	42	266	5355	4.31	1	0.0416	0.0051
MULTICASE_TOX_PREDICTION	PEPT1 inhibition at 100uM	6	7.89	0.0008	22345-47-7, 68047-06-3, 68392-35-8, 30299-08-2, 85-60-9, 77-40-7	67	1936	7882	0.36	1	0.0416	0.0051
LEADSCOPE_TOXICITY	Developmental Toxicity: retardation rodent	13	17.11	0.0008	115-39-9, 71-67-0, 518-28-5, 33419-42-0, 6559-91-7, 76-60-8, 125-31-5, 13473-26-2, 31477-60-8, 143-74-8, 29767-20-2, 34487-61-1, 117091-64-2	66	467	7259	3.06	1	0.0416	0.0051
MULTICASE_TOX_PREDICTION	MRP2 inhibition at 10uM	21	27.63	0.0008	68047-06-3, 71-67-0, 1260-17-9, 125-31-5, 79-95-8, 117091-64-2, 518-28-5, 85-60-9, 76-60-8, 30299-08-2, 68392-35-8, 143-74-8, 33419-42-0, 22345-47-7, 34487-61-1, 29767-20-2, 115-39-9, 77-40-7, 10040-45-6, 6559-91-7, 1565-94-2	67	4014	7882	0.62	1	0.0416	0.0051
TOXPRINT_STRUCTURE	ring:hetero_[5_6]_O_benzodioxole_(1_3-)	5	6.58	0.0008	29767-20-2, 6559-91-7, 518-28-5, 117091-64-2, 33419-42-0	67	52	8195	11.76	1	0.042	0.0051
MULTICASE_TOX_PREDICTION	RCA human liver function (liver enzymes release blood test)	19	25	0.0008	1470-79-7, 81-90-3, 131-55-5, 33419-42-0, 4162-45-2, 52479-85-3, 6559-91-7, 21850-44-2, 61445-50-9, 41351-30-8, 29767-20-2, 25327-89-3, 117091-64-2, 16423-68-0, 131-54-4, 14008-48-1, 115-39-9, 79-94-7, 518-28-5	67	949	7882	2.36	1	0.0422	0.0052
TOXCAST_ACTIVE	Tox21_MitochondrialToxicity_ratio	11	14.47	0.0008	72-43-5, 79-95-8, 27955-94-8, 68392-35-8, 77-40-7, 1478-61-1, 2971-36-0, 79-94-7, 131-55-5, 80-05-7, 77-09-8	18	361	1694	2.87	1	0.0423	0.0052
HTS_ACTIVE	genotoxic stress:tox21-dt40-p1_dsb-inducer_1	11	14.47	0.0008	611-99-4, 117091-64-2, 1470-79-7, 29767-20-2, 15905-32-5, 33419-42-0, 115-33-3, 118-82-1, 129-16-8, 131-55-5, 6807-17-6	68	296	6512	3.56	1	0.0428	0.0052
DRUGBANK_ATC	Contact laxatives	3	3.95	0.0008	603-50-9, 125-13-3, 77-09-8	13	5	1261	58.2	1	0.0436	0.0053
MESH	Fluoresceins	3	3.95	0.0008	15905-32-5, 13473-26-2, 518-47-8	42	6	5355	63.75	1	0.0447	0.0055
TOXCAST_ACTIVE	NVS_ENZ_hTrkA	4	5.26	0.0009	1478-61-1, 80-05-7, 131-55-5, 2971-36-0	18	20	1694	18.82	1	0.0456	0.0056
MULTICASE_TOX_PREDICTION	RCA survival post-implantation, rat	15	19.74	0.0009	72-43-5, 33419-42-0, 6559-91-7, 68392-35-8, 21850-44-2, 68047-06-3, 30299-08-2, 518-28-5, 1565-94-2, 29767-20-2, 117091-64-2, 38103-06-9, 10040-45-6, 31477-60-8, 603-50-9	67	655	7882	2.69	1	0.0456	0.0056
TOXCAST_ACTIVE	NVS_TR_rVMAT2	5	6.58	0.0009	1478-61-1, 68392-35-8, 2971-36-0, 77-40-7, 80-05-7	18	46	1694	10.23	1	0.0461	0.0056
HTS_STRONGACTIVE	cytotoxicity:tox21-rt-viability-hek293-p1_viability@flor_0h_1	6	7.89	0.0009	15086-94-9, 15905-32-5, 61445-50-9, 518-47-8, 16423-68-0, 13473-26-2	61	62	4870	7.73	1	0.0475	0.0058
TOXPRINT_STRUCTURE	bond:CX_halide_aromatic-X_ether_aromatic_(Ph-O-Ph)	6	7.89	0.0009	38103-06-9, 15905-32-5, 27072-45-3, 13473-26-2, 518-47-8, 15086-94-9	67	94	8195	7.81	1	0.048	0.0059
HTS_STRONGACTIVE	sex hormone homeostasis:tox21-er-luc-bg1-4e2-antagonist-p2_er-antagonist_1	12	15.79	0.0009	603-50-9, 569-57-3, 1943-97-1, 115-33-3, 2971-36-0, 68047-06-3, 13080-86-9, 68392-35-8, 79-97-0, 4162-45-2, 24038-68-4, 125-13-3	61	301	4870	3.18	1	0.0488	0.006
TOXPRINT_STRUCTURE	ring:hetero_[6_6]_Z_generic	14	18.42	0.001	13473-26-2, 27072-45-3, 518-47-8, 16423-68-0, 31477-60-8, 129-16-8, 139233-53-7, 15086-94-9, 29767-20-2, 117091-64-2, 517-28-2, 14008-48-1, 33419-42-0, 15905-32-5	67	608	8195	2.82	1	0.0494	0.006
TOXCAST_ACTIVE	NVS_ADME_hCYP2C19	10	13.16	0.001	1478-61-1, 2971-36-0, 77-40-7, 131-55-5, 81-90-3, 77-09-8, 79-94-7, 72-43-5, 68392-35-8, 27955-94-8	18	301	1694	3.13	1	0.0522	0.0064
CTD_CHEMICALS_DISEASES	Corneal Neovascularization	5	6.58	0.0011	67227-56-9, 72-43-5, 33419-42-0, 29767-20-2, 16423-68-0	25	51	2583	10.13	1	0.0553	0.0068
TOXCAST_ACTIVE	Tox21_AR_LUC_MDAKB2_Antagonist	9	11.84	0.0011	72-43-5, 27955-94-8, 68392-35-8, 77-40-7, 80-05-7, 2971-36-0, 1478-61-1, 115-39-9, 79-94-7	18	241	1694	3.51	1	0.0587	0.0072
HTS_ACTIVE	heat shock stress:tox21-hse-bla-p1_hse-agonist_1	12	15.79	0.0012	79-95-8, 33419-42-0, 4162-45-2, 27955-94-8, 6807-17-6, 68047-06-3, 79-94-7, 843-55-0, 14868-03-2, 85-60-9, 16423-68-0, 1943-97-1	68	367	6512	3.13	1	0.0594	0.0073
HTS_STRONGACTIVE	cell viability:tox21-dt40-p1_viability@653_1	29	38.16	0.0012	1565-94-2, 61445-50-9, 52479-85-3, 6559-91-7, 76-60-8, 79-97-0, 33419-42-0, 31127-54-5, 4162-45-2, 1943-97-1, 85-60-9, 843-55-0, 518-28-5, 77-40-7, 68047-06-3, 2971-36-0, 115-39-9, 68392-35-8, 72-43-5, 517-28-2, 569-57-3, 603-50-9, 31477-60-8, 5613-46-7, 80-05-7, 16423-68-0, 117091-64-2, 14868-03-2, 29767-20-2	61	1324	4870	1.75	1	0.0594	0.0073
MULTICASE_TOX_PREDICTION	RCA fetal dysmorphogenesis, mouse	16	21.05	0.0012	33419-42-0, 125-31-5, 76-60-8, 6559-91-7, 10040-45-6, 13473-26-2, 143-74-8, 1260-17-9, 115-39-9, 68047-06-3, 518-28-5, 68392-35-8, 31477-60-8, 29767-20-2, 34487-61-1, 117091-64-2	67	755	7882	2.49	1	0.0594	0.0073
MULTICASE_TOX_PREDICTION	RCA survival pre-implantation, rat	10	13.16	0.0012	72-43-5, 14008-48-1, 68392-35-8, 10040-45-6, 31477-60-8, 30299-08-2, 68047-06-3, 2624-43-3, 115-33-3, 603-50-9	67	317	7882	3.71	1	0.0611	0.0075
TOXCAST_ACTIVE	Tox21_ERa_BLA_Antagonist_ratio	10	13.16	0.0013	27955-94-8, 68392-35-8, 79-95-8, 72-43-5, 79-94-7, 77-09-8, 77-40-7, 80-05-7, 1478-61-1, 2971-36-0	18	310	1694	3.04	1	0.0639	0.0078
TOXCAST_ACTIVE	ATG_ERE_CIS_up	13	17.11	0.0014	126-00-1, 143-74-8, 77-09-8, 81-90-3, 131-55-5, 80-05-7, 16423-68-0, 27955-94-8, 72-43-5, 79-95-8, 77-40-7, 1478-61-1, 2971-36-0	18	550	1694	2.22	1	0.0693	0.0085
TOXCAST_ACTIVE	NVS_GPCR_hDRD1	6	7.89	0.0014	68392-35-8, 77-09-8, 2971-36-0, 1478-61-1, 77-40-7, 80-05-7	18	90	1694	6.27	1	0.071	0.0087
HTS_ACTIVE	cytotoxicity:tox21-rt-viability-hek293-p1_viability@flor_40h_1	21	27.63	0.0014	79-97-0, 61445-50-9, 6807-17-6, 1565-94-2, 85-60-9, 13473-26-2, 518-47-8, 1943-97-1, 15086-94-9, 139233-53-7, 15905-32-5, 517-28-2, 68392-35-8, 68047-06-3, 843-55-0, 14868-03-2, 24038-68-4, 5613-46-7, 16423-68-0, 131-54-4, 1571-75-1	68	963	6512	2.09	1	0.0725	0.0089
TOXCAST_ACTIVE	ATG_Pax6_CIS_up	9	11.84	0.0015	77-40-7, 80-05-7, 16423-68-0, 1478-61-1, 79-94-7, 77-09-8, 79-95-8, 27955-94-8, 68392-35-8	18	250	1694	3.39	1	0.0732	0.009
HTS_STRONGACTIVE	counter screen (cell viability):tox21-car-agonist-p1_viability_1	11	14.47	0.0015	76-60-8, 34487-61-1, 85-60-9, 15905-32-5, 518-28-5, 4221-68-5, 15086-94-9, 143-74-8, 115-39-9, 16423-68-0, 13473-26-2	61	270	4870	3.25	1	0.0741	0.0091
HTS_STRONGACTIVE	counter screen (cell viability):tox21-p53-bla-p4_viability_1	13	17.11	0.0015	2971-36-0, 68047-06-3, 6807-17-6, 79-94-7, 115-33-3, 125-13-3, 13473-26-2, 3236-71-3, 5613-46-7, 603-50-9, 569-57-3, 1943-97-1, 85-60-9	61	369	4870	2.81	1	0.0742	0.0091
TOXCAST_ACTIVE	NVS_NR_hTRa	5	6.58	0.0015	143-74-8, 1260-17-9, 115-39-9, 2971-36-0, 68392-35-8	18	53	1694	8.88	1	0.0745	0.0091
MESH	Heterocyclic Compounds, 1-Ring	2	2.63	0.0015	10040-45-6, 14008-48-1	42	1087	5355	0.23	1	0.075	0.0092
HTS_ACTIVE	xenobiotic homeostasis:tox21-pxr-p1_pxr-agonist_1	36	47.37	0.0015	77-09-8, 131-55-5, 1470-79-7, 33419-42-0, 79-95-8, 131-54-4, 569-57-3, 13080-86-9, 14868-03-2, 24038-68-4, 843-55-0, 68047-06-3, 1943-97-1, 2624-43-3, 85-60-9, 1565-94-2, 61445-50-9, 6807-17-6, 1478-61-1, 27955-94-8, 79-97-0, 31127-54-5, 4162-45-2, 1571-75-1, 80-05-7, 5613-46-7, 3236-71-3, 611-99-4, 79-94-7, 518-28-5, 4221-68-5, 77-40-7, 620-92-8, 2971-36-0, 72-43-5, 14008-48-1	68	2165	6512	1.59	1	0.0759	0.0093
TOXCAST_ACTIVE	BSK_4H_MCP1_down	9	11.84	0.0015	80-05-7, 77-40-7, 2971-36-0, 1478-61-1, 79-94-7, 77-09-8, 72-43-5, 27955-94-8, 68392-35-8	18	252	1694	3.36	1	0.0759	0.0093
INDICATION	Constipation	3	3.95	0.0016	125-13-3, 77-09-8, 603-50-9	13	7	1313	43.29	1	0.0765	0.0094
HTS_ACTIVE	counter screen (cell viability):tox21-ppard-bla-antagonist-p1_viability_1	21	27.63	0.0016	843-55-0, 79-94-7, 115-39-9, 68047-06-3, 2971-36-0, 68392-35-8, 14008-48-1, 16423-68-0, 3236-71-3, 5613-46-7, 14868-03-2, 1565-94-2, 61445-50-9, 6807-17-6, 79-97-0, 27955-94-8, 4162-45-2, 33419-42-0, 79-95-8, 1943-97-1, 85-60-9	68	972	6512	2.07	1	0.0765	0.0094
HTS_ACTIVE	cytotoxicity:tox21-rt-viability-hek293-p1_viability@flor_16h_1	18	23.68	0.0016	68392-35-8, 517-28-2, 15905-32-5, 843-55-0, 68047-06-3, 24038-68-4, 1571-75-1, 131-54-4, 16423-68-0, 79-97-0, 61445-50-9, 6807-17-6, 85-60-9, 139233-53-7, 15086-94-9, 1943-97-1, 518-47-8, 13473-26-2	68	759	6512	2.27	1	0.077	0.0094
TOXCAST_ACTIVE	BSK_4H_VCAM1_down	9	11.84	0.0016	72-43-5, 68392-35-8, 27955-94-8, 1478-61-1, 2971-36-0, 77-40-7, 80-05-7, 77-09-8, 79-94-7	18	253	1694	3.35	1	0.077	0.0094
TOXCAST_ACTIVE	BSK_hDFCGF_PAI1_down	9	11.84	0.0016	68392-35-8, 27955-94-8, 72-43-5, 77-09-8, 79-94-7, 1478-61-1, 2971-36-0, 77-40-7, 1260-17-9	18	254	1694	3.33	1	0.0788	0.0097
TOXCAST_ACTIVE	Tox21_p53_BLA_p4_ratio	9	11.84	0.0018	79-95-8, 27955-94-8, 68392-35-8, 77-40-7, 131-55-5, 2971-36-0, 1478-61-1, 79-94-7, 77-09-8	18	257	1694	3.3	1	0.0851	0.0104
HTS_STRONGACTIVE	lipid homeostasis:tox21-ppard-bla-antagonist-p1_ppard-antagonist_1	6	7.89	0.0018	14868-03-2, 77-40-7, 80-05-7, 15086-94-9, 27955-94-8, 518-47-8	61	72	4870	6.65	1	0.0857	0.0105
HTS_STRONGACTIVE	xenobiotic homeostasis:tox21-p450-3a4-p1_3a4-inhibitor_1	26	34.21	0.0018	131-55-5, 1943-97-1, 77-09-8, 85-60-9, 1470-79-7, 61445-50-9, 6807-17-6, 1478-61-1, 27955-94-8, 76-60-8, 79-97-0, 80-05-7, 13080-86-9, 5613-46-7, 3236-71-3, 1571-75-1, 603-50-9, 14868-03-2, 24038-68-4, 34487-61-1, 77-40-7, 68047-06-3, 2971-36-0, 843-55-0, 518-28-5, 4221-68-5	61	1141	4870	1.82	1	0.0862	0.0106
TOXPRINT_STRUCTURE	ring:hetero_[5]_Z_1-Z	17	22.37	0.0018	33419-42-0, 125-13-3, 6559-91-7, 129-16-8, 13473-26-2, 27072-45-3, 518-47-8, 15086-94-9, 77-09-8, 71-67-0, 115-33-3, 518-28-5, 15905-32-5, 38103-06-9, 31477-60-8, 29767-20-2, 117091-64-2	67	876	8195	2.37	1	0.0867	0.0106
HTS_STRONGACTIVE	counter screen (cell viability):tox21-rar-viability-p2_viability_1	8	10.53	0.0018	1260-17-9, 15905-32-5, 85-60-9, 13473-26-2, 16423-68-0, 115-39-9, 76-60-8, 1565-94-2	61	145	4870	4.4	1	0.0879	0.0108
TOXCAST_ACTIVE	NVS_GPCR_hOpiate_D1	5	6.58	0.0019	2971-36-0, 1478-61-1, 131-55-5, 77-40-7, 80-05-7	18	56	1694	8.4	1	0.0879	0.0108
HTS_ACTIVE	counter screen (cell viability):tox21-fxr-bla-antagonist-p1_viability_1	18	23.68	0.0019	517-28-2, 68392-35-8, 68047-06-3, 115-39-9, 843-55-0, 14868-03-2, 5613-46-7, 3236-71-3, 16423-68-0, 603-50-9, 4162-45-2, 76-60-8, 79-97-0, 6807-17-6, 1565-94-2, 85-60-9, 13473-26-2, 1943-97-1	68	773	6512	2.23	1	0.0879	0.0108
LEADSCOPE_TOXICITY	Rodent Carcinogenicity: C3H10T1-2	39	51.32	0.0019	79-95-8, 131-55-5, 1470-79-7, 843-55-0, 1260-17-9, 68047-06-3, 131-54-4, 603-50-9, 30299-08-2, 1478-61-1, 31127-54-5, 85-60-9, 620-92-8, 2971-36-0, 80-05-7, 611-99-4, 41351-30-8, 68392-35-8, 569-57-3, 14868-03-2, 25327-89-3, 118-82-1, 1565-94-2, 6807-17-6, 61445-50-9, 27955-94-8, 79-97-0, 52479-85-3, 21850-44-2, 125-13-3, 4162-45-2, 1943-97-1, 2624-43-3, 79-94-7, 77-40-7, 72-43-5, 517-28-2, 5613-…	66	2828	7259	1.52	1	0.0907	0.0111
HTS_ACTIVE	counter screen (cell viability):tox21-erb-bla-antagonist-p1_viability_1	25	32.89	0.0019	31127-54-5, 79-95-8, 4162-45-2, 27955-94-8, 79-97-0, 76-60-8, 6807-17-6, 1478-61-1, 1565-94-2, 85-60-9, 13473-26-2, 1943-97-1, 14008-48-1, 68392-35-8, 68047-06-3, 115-39-9, 79-94-7, 843-55-0, 4221-68-5, 14868-03-2, 24038-68-4, 5613-46-7, 13080-86-9, 3236-71-3, 1571-75-1	68	1294	6512	1.85	1	0.0912	0.0112
TOXCAST_ACTIVE	BSK_BE3C_PAI1_down	8	10.53	0.002	79-94-7, 131-55-5, 81-90-3, 1478-61-1, 2971-36-0, 27955-94-8, 68392-35-8, 72-43-5	18	201	1694	3.75	1	0.096	0.0118
HTS_ACTIVE	counter screen (cell viability):tox21-erb-bla-p1_viability_1	26	34.21	0.0021	1943-97-1, 2624-43-3, 13473-26-2, 85-60-9, 1565-94-2, 6807-17-6, 1478-61-1, 79-97-0, 76-60-8, 79-95-8, 4162-45-2, 131-54-4, 1571-75-1, 5613-46-7, 13080-86-9, 3236-71-3, 14868-03-2, 24038-68-4, 843-55-0, 79-94-7, 4221-68-5, 115-39-9, 2971-36-0, 68047-06-3, 68392-35-8, 14008-48-1	68	1353	6512	1.84	1	0.0962	0.0118
CTD_CHEMICALS_DISEASES	Meningioma	7	9.21	0.0021	143-74-8, 79-94-7, 79-95-8, 31477-60-8, 33419-42-0, 2971-36-0, 29767-20-2	25	152	2583	4.76	1	0.0975	0.0119
TOXCAST_ACTIVE	BSK_hDFCGF_VCAM1_down	9	11.84	0.0022	72-43-5, 68392-35-8, 27955-94-8, 2971-36-0, 1478-61-1, 77-40-7, 80-05-7, 77-09-8, 79-94-7	18	265	1694	3.2	1	0.1007	0.0123
HTS_STRONGACTIVE	counter screen (cell viability):tox21-ahr-p1_viability_1	11	14.47	0.0022	15905-32-5, 517-28-2, 34487-61-1, 76-60-8, 1260-17-9, 115-39-9, 16423-68-0, 68047-06-3, 13473-26-2, 15086-94-9, 143-74-8	61	284	4870	3.09	1	0.1007	0.0123
HTS_STRONGACTIVE	thyroid homeostasis:tox21-gh3-tre-antagonist-p1_tr-antagonist_1	11	14.47	0.0022	115-39-9, 131-55-5, 518-28-5, 569-57-3, 1943-97-1, 4162-45-2, 29767-20-2, 14868-03-2, 79-95-8, 68392-35-8, 76-60-8	61	285	4870	3.08	1	0.1031	0.0126
TOXINS_TARGETS	CYP19A1	5	6.58	0.0022	16423-68-0, 77-09-8, 2971-36-0, 68047-06-3, 1260-17-9	14	57	1220	7.64	1	0.1032	0.0126
TOXCAST_ACTIVE	BSK_3C_Vis_down	9	11.84	0.0024	77-09-8, 79-94-7, 2971-36-0, 1478-61-1, 80-05-7, 77-40-7, 68392-35-8, 27955-94-8, 72-43-5	18	269	1694	3.15	1	0.1099	0.0135
TOXCAST_ACTIVE	BSK_SAg_CD69_down	9	11.84	0.0024	1478-61-1, 2971-36-0, 80-05-7, 77-40-7, 77-09-8, 79-94-7, 72-43-5, 68392-35-8, 27955-94-8	18	269	1694	3.15	1	0.1099	0.0135
MESH	Glucosides	3	3.95	0.0025	117091-64-2, 33419-42-0, 29767-20-2	42	10	5355	38.25	1	0.1132	0.0139
TOXCAST_ACTIVE	OT_AR_ARSRC1_0960	8	10.53	0.0027	72-43-5, 79-95-8, 68392-35-8, 2971-36-0, 1478-61-1, 131-55-5, 80-05-7, 79-94-7	18	210	1694	3.59	1	0.121	0.0148
TOXCAST_ACTIVE	ATG_PXR_TRANS_up	12	15.79	0.0027	72-43-5, 79-95-8, 68392-35-8, 27955-94-8, 1478-61-1, 115-39-9, 77-40-7, 118-82-1, 79-94-7, 16423-68-0, 80-05-7, 77-09-8	18	500	1694	2.26	1	0.1217	0.0149
CTD_CHEMICALS_GENES	ESR2	6	7.89	0.0028	68392-35-8, 2971-36-0, 29767-20-2, 80-05-7, 131-55-5, 72-43-5	22	111	2273	5.58	1	0.1249	0.0153
HTS_ACTIVE	counter screen (cell viability):tox21-rxr-bla-agonist-p1_viability_1	22	28.95	0.0029	1565-94-2, 6807-17-6, 1478-61-1, 76-60-8, 79-97-0, 52479-85-3, 33419-42-0, 4162-45-2, 1943-97-1, 13473-26-2, 85-60-9, 843-55-0, 79-94-7, 4221-68-5, 68047-06-3, 68392-35-8, 1571-75-1, 13080-86-9, 5613-46-7, 16423-68-0, 3236-71-3, 24038-68-4	68	1096	6512	1.92	1	0.1291	0.0158
LEADSCOPE_TOXICITY	Genetic Toxicity: salmonella	3	3.95	0.0029	21850-44-2, 1260-17-9, 3236-71-3	66	1133	7259	0.29	1	0.1292	0.0158
HTS_ACTIVE	development:tox21-shh-3t3-gli3-antagonist-p1_shh-antagonist_1	25	32.89	0.0029	79-94-7, 518-28-5, 77-40-7, 2971-36-0, 620-92-8, 72-43-5, 131-54-4, 1571-75-1, 603-50-9, 13080-86-9, 38103-06-9, 80-05-7, 611-99-4, 14868-03-2, 61445-50-9, 1478-61-1, 79-97-0, 33419-42-0, 79-95-8, 4162-45-2, 1943-97-1, 77-09-8, 131-55-5, 2624-43-3, 1470-79-7	68	1296	6512	1.85	1	0.1325	0.0162
HTS_ACTIVE	cytotoxicity:tox21-rt-viability-hepg2-p1_viability@flor_40h_1	19	25	0.003	68392-35-8, 14008-48-1, 15905-32-5, 4221-68-5, 68047-06-3, 115-39-9, 24038-68-4, 1571-75-1, 3236-71-3, 16423-68-0, 5613-46-7, 33419-42-0, 1478-61-1, 6807-17-6, 85-60-9, 139233-53-7, 15086-94-9, 13473-26-2, 518-47-8	68	867	6512	2.1	1	0.135	0.0165
HTS_STRONGACTIVE	cell viability:tox21-dt40-p1_viability@100_1	28	36.84	0.0031	15905-32-5, 72-43-5, 517-28-2, 68392-35-8, 115-39-9, 68047-06-3, 2971-36-0, 843-55-0, 518-28-5, 29767-20-2, 117091-64-2, 5613-46-7, 31477-60-8, 16423-68-0, 569-57-3, 603-50-9, 33419-42-0, 4162-45-2, 79-97-0, 76-60-8, 6559-91-7, 52479-85-3, 61445-50-9, 6807-17-6, 1565-94-2, 85-60-9, 129-16-8, 1943-97-1	61	1319	4870	1.69	1	0.1366	0.0167
TOXCAST_ACTIVE	NVS_GPCR_hOpiate_mu	6	7.89	0.0031	1478-61-1, 2971-36-0, 80-05-7, 77-40-7, 77-09-8, 68392-35-8	18	107	1694	5.28	1	0.1371	0.0168
LEADSCOPE_TOXICITY	Genetic Toxicity: UDS human lymphocytes	12	15.79	0.0031	52479-85-3, 517-28-2, 31127-54-5, 33419-42-0, 518-28-5, 1260-17-9, 61445-50-9, 611-99-4, 1470-79-7, 41351-30-8, 131-54-4, 131-55-5	66	478	7259	2.76	1	0.1395	0.0171
HTS_ACTIVE	counter screen (cell viability):tox21-hse-bla-p1_viability_1	16	21.05	0.0032	1565-94-2, 843-55-0, 79-94-7, 68047-06-3, 6807-17-6, 76-60-8, 79-97-0, 27955-94-8, 4162-45-2, 79-95-8, 72-43-5, 1943-97-1, 3236-71-3, 5613-46-7, 85-60-9, 14868-03-2	68	663	6512	2.31	1	0.1428	0.0175
HTS_STRONGACTIVE	sex hormone homeostasis:tox21-er-luc-bg1-4e2-antagonist-p1_er-antagonist_1	9	11.84	0.0033	6559-91-7, 68392-35-8, 29767-20-2, 4162-45-2, 33419-42-0, 518-28-5, 569-57-3, 1943-97-1, 68047-06-3	61	205	4870	3.5	1	0.1475	0.0181
TOXCAST_ACTIVE	BSK_SAg_MIG_down	7	9.21	0.0034	68392-35-8, 77-09-8, 79-94-7, 27955-94-8, 2971-36-0, 1478-61-1, 72-43-5	18	161	1694	4.09	1	0.1509	0.0185
HTS_ACTIVE	counter screen (cell viability):tox21-vdr-bla-agonist-p1_viability_1	21	27.63	0.0036	79-97-0, 76-60-8, 33419-42-0, 4162-45-2, 1565-94-2, 6807-17-6, 85-60-9, 1943-97-1, 13473-26-2, 68392-35-8, 72-43-5, 843-55-0, 79-94-7, 115-39-9, 68047-06-3, 2971-36-0, 14868-03-2, 131-54-4, 5613-46-7, 16423-68-0, 3236-71-3	68	1029	6512	1.95	1	0.1562	0.0191
TOXCAST_ACTIVE	BSK_3C_IL8_down	8	10.53	0.0036	79-94-7, 77-09-8, 77-40-7, 1478-61-1, 2971-36-0, 27955-94-8, 68392-35-8, 72-43-5	18	221	1694	3.41	1	0.157	0.0192
MULTICASE_TOX_PREDICTION	RCA survival post-implantation, rodent	17	22.37	0.0036	21850-44-2, 6559-91-7, 33419-42-0, 30299-08-2, 10040-45-6, 68392-35-8, 14008-48-1, 72-43-5, 518-28-5, 68047-06-3, 117091-64-2, 29767-20-2, 14868-03-2, 569-57-3, 603-50-9, 38103-06-9, 31477-60-8	67	926	7882	2.16	1	0.1572	0.0193
CTD_CHEMICALS_GOENRICH_MOLFUNCT	GO:0003707|steroid hormone receptor activity	5	6.58	0.0036	79-94-7, 79-95-8, 68392-35-8, 518-28-5, 2971-36-0	14	58	1090	6.71	1	0.1572	0.0193
MULTICASE_TOX_PREDICTION	MCT1 substrates	12	15.79	0.0036	81-90-3, 22345-47-7, 603-50-9, 68047-06-3, 68392-35-8, 2624-43-3, 85-60-9, 30299-08-2, 16423-68-0, 77-40-7, 115-33-3, 14008-48-1	67	2611	7882	0.54	1	0.1572	0.0193
TOXINS_TARGETS	PGR	5	6.58	0.0037	79-94-7, 79-95-8, 72-43-5, 68047-06-3, 2971-36-0	14	65	1220	6.7	1	0.1585	0.0194
TOXCAST_ACTIVE	BSK_4H_uPAR_down	8	10.53	0.0037	1478-61-1, 2971-36-0, 77-40-7, 77-09-8, 79-94-7, 72-43-5, 68392-35-8, 27955-94-8	18	222	1694	3.39	1	0.1591	0.0195
DRUGBANK_TARGETS	ESRRG	3	3.95	0.0037	843-55-0, 68392-35-8, 80-05-7	12	11	1249	28.39	1	0.1604	0.0196
TOXCAST_ACTIVE	BSK_LPS_VCAM1_down	9	11.84	0.0038	79-94-7, 77-09-8, 80-05-7, 77-40-7, 1478-61-1, 2971-36-0, 27955-94-8, 68392-35-8, 72-43-5	18	288	1694	2.94	1	0.1616	0.0198
TOXCAST_ACTIVE	NVS_TR_gDAT	6	7.89	0.0038	68392-35-8, 1478-61-1, 2971-36-0, 77-40-7, 80-05-7, 72-43-5	18	112	1694	5.04	1	0.1616	0.0198
LEADSCOPE_TOXICITY	Human Adverse Hepatobiliary Effects: bile duct	5	6.58	0.0038	603-50-9, 1565-94-2, 29767-20-2, 117091-64-2, 33419-42-0	66	72	7259	7.64	1	0.1635	0.02
TOXINS_TARGETS	NR3C1	5	6.58	0.0039	2971-36-0, 68047-06-3, 79-95-8, 79-94-7, 80-05-7	14	66	1220	6.6	1	0.165	0.0202
HTS_ACTIVE	cytotoxicity:tox21-rt-viability-hepg2-p1_viability@flor_32h_1	19	25	0.0039	24038-68-4, 1571-75-1, 5613-46-7, 3236-71-3, 16423-68-0, 68392-35-8, 15905-32-5, 14008-48-1, 4221-68-5, 68047-06-3, 115-39-9, 85-60-9, 15086-94-9, 139233-53-7, 13473-26-2, 518-47-8, 33419-42-0, 6807-17-6, 1478-61-1	68	898	6512	2.03	1	0.1651	0.0202
LEADSCOPE_TOXICITY	Human Adverse Cardiological Effects: heart failure	13	17.11	0.0039	76-60-8, 6559-91-7, 4162-45-2, 33419-42-0, 1565-94-2, 518-28-5, 115-39-9, 1260-17-9, 71-67-0, 117091-64-2, 29767-20-2, 15086-94-9, 129-16-8	66	565	7259	2.53	1	0.1651	0.0202
TOXINS_TARGETS	OPRM1	4	5.26	0.0043	77-09-8, 80-05-7, 68047-06-3, 2971-36-0	14	33	1220	10.56	1	0.1818	0.0223
CTD_CHEMICALS_GENES	PGR	5	6.58	0.0045	2971-36-0, 29767-20-2, 31477-60-8, 72-43-5, 80-05-7	22	76	2273	6.8	1	0.1889	0.0231
LEADSCOPE_TOXICITY	Rodent Carcinogenicity: BALBc-3T3	11	14.47	0.0045	72-43-5, 41351-30-8, 3236-71-3, 4162-45-2, 21850-44-2, 1565-94-2, 1260-17-9, 14868-03-2, 25327-89-3, 131-54-4, 569-57-3	66	2302	7259	0.53	1	0.1889	0.0231
TOXCAST_ACTIVE	Tox21_PPARg_BLA_antagonist_ratio	7	9.21	0.0045	79-94-7, 27955-94-8, 79-95-8, 77-40-7, 80-05-7, 2971-36-0, 1478-61-1	18	170	1694	3.88	1	0.1898	0.0233
HTS_ACTIVE	counter screen (cell viability):tox21-mitotox-p1_viability_1	20	26.32	0.0045	13473-26-2, 518-47-8, 131-55-5, 77-09-8, 1470-79-7, 85-60-9, 6807-17-6, 1565-94-2, 76-60-8, 3236-71-3, 16423-68-0, 5613-46-7, 569-57-3, 131-54-4, 14868-03-2, 2971-36-0, 68047-06-3, 115-39-9, 15905-32-5, 68392-35-8	68	956	6512	2	1	0.1902	0.0233
HTS_ACTIVE	counter screen (cell viability):tox21-sbe-bla-antagonist-p1_viability_1	13	17.11	0.0045	68047-06-3, 1565-94-2, 4221-68-5, 843-55-0, 4162-45-2, 76-60-8, 68392-35-8, 3236-71-3, 603-50-9, 569-57-3, 1943-97-1, 24038-68-4, 85-60-9	68	501	6512	2.48	1	0.1902	0.0233
HTS_ACTIVE	counter screen (cell viability):tox21-pr-bla-agonist-p1_viability_1	24	31.58	0.0047	1943-97-1, 13473-26-2, 85-60-9, 1565-94-2, 6807-17-6, 1478-61-1, 27955-94-8, 79-97-0, 76-60-8, 33419-42-0, 4162-45-2, 1571-75-1, 5613-46-7, 13080-86-9, 3236-71-3, 16423-68-0, 14868-03-2, 24038-68-4, 79-94-7, 843-55-0, 4221-68-5, 68047-06-3, 115-39-9, 68392-35-8	68	1275	6512	1.8	1	0.1946	0.0238
HTS_STRONGACTIVE	sex hormone homeostasis:tox21-ar-mda-kb2-luc-antagonist-p1_ar-antagonist_1	10	13.16	0.0047	603-50-9, 115-33-3, 2971-36-0, 3236-71-3, 5613-46-7, 79-97-0, 27955-94-8, 29767-20-2, 14868-03-2, 125-13-3	61	265	4870	3.01	1	0.1946	0.0238
PHARMACTIONLIST	Physiological Effects of Drugs	6	7.89	0.0047	67227-56-9, 2624-43-3, 569-57-3, 80-05-7, 68392-35-8, 68047-06-3	27	1296	2720	0.47	1	0.1961	0.024
TOXCAST_ACTIVE	BSK_KF3CT_MMP9_down	8	10.53	0.0049	27955-94-8, 68392-35-8, 72-43-5, 79-94-7, 77-09-8, 77-40-7, 1478-61-1, 2971-36-0	18	233	1694	3.23	1	0.2013	0.0247
TOXCAST_ACTIVE	NVS_ADME_hCYP2C9	7	9.21	0.0051	72-43-5, 77-40-7, 80-05-7, 1478-61-1, 2971-36-0, 79-94-7, 77-09-8	18	174	1694	3.79	1	0.2097	0.0257
CTD_CHEMICALS_DISEASES	Essential Tremor	5	6.58	0.0052	129-16-8, 29767-20-2, 77-09-8, 569-57-3, 16423-68-0	25	78	2583	6.62	1	0.2126	0.026
TOXCAST_ACTIVE	NVS_GPCR_g5HT4	5	6.58	0.0052	77-40-7, 80-05-7, 1478-61-1, 2971-36-0, 68392-35-8	18	74	1694	6.36	1	0.2127	0.0261
HTS_STRONGACTIVE	thyroid homeostasis:tox21-trhr-hek293-p1_trhr-agonist_1	6	7.89	0.0052	79-95-8, 15905-32-5, 13473-26-2, 16423-68-0, 518-47-8, 15086-94-9	61	92	4870	5.21	1	0.2127	0.0261
HTS_ACTIVE	cytotoxicity:tox21-rt-viability-hek293-p1_viability@flor_8h_1	18	23.68	0.0052	85-60-9, 15086-94-9, 1943-97-1, 139233-53-7, 518-47-8, 13473-26-2, 79-97-0, 4162-45-2, 61445-50-9, 24038-68-4, 131-54-4, 1571-75-1, 16423-68-0, 68392-35-8, 15905-32-5, 517-28-2, 843-55-0, 68047-06-3	68	844	6512	2.04	1	0.2127	0.0261
DRUGBANK_TARGETS	TOP2A	3	3.95	0.0052	33419-42-0, 29767-20-2, 518-28-5	12	13	1249	24.02	1	0.2128	0.0261
TOXINS_TARGETS	AR	7	9.21	0.0054	68047-06-3, 2971-36-0, 80-05-7, 77-09-8, 79-94-7, 72-43-5, 79-95-8	14	173	1220	3.53	1	0.22	0.0269
TOXCAST_ACTIVE	BSK_CASM3C_SRB_down	6	7.89	0.0055	72-43-5, 2971-36-0, 1478-61-1, 79-94-7, 27955-94-8, 68392-35-8	18	122	1694	4.63	1	0.2217	0.0272
CTD_CHEMICALS_GOENRICH_MOLFUNCT	GO:0005496|steroid binding	5	6.58	0.0055	518-28-5, 68392-35-8, 79-94-7, 33419-42-0, 72-43-5	14	65	1090	5.99	1	0.2218	0.0272
MULTICASE_TOX_PREDICTION	RCA fetal growth retardation, rat	12	15.79	0.0055	10040-45-6, 2624-43-3, 13473-26-2, 603-50-9, 68047-06-3, 30299-08-2, 115-33-3, 79-95-8, 72-43-5, 14008-48-1, 21850-44-2, 68392-35-8	67	550	7882	2.57	1	0.2227	0.0273
CTD_CHEMICALS_DISEASES	Burkitt Lymphoma	4	5.26	0.0056	79-95-8, 29767-20-2, 143-74-8, 68392-35-8	25	40	2583	10.33	1	0.2238	0.0274
TOXCAST_ACTIVE	BSK_3C_MCP1_down	8	10.53	0.0056	77-09-8, 79-94-7, 1478-61-1, 2971-36-0, 77-40-7, 68392-35-8, 27955-94-8, 72-43-5	18	239	1694	3.15	1	0.2259	0.0277
HTS_STRONGACTIVE	counter screen (cell viability):tox21-car-antagonist-p1_viability_1	11	14.47	0.0057	34487-61-1, 76-60-8, 85-60-9, 15905-32-5, 15086-94-9, 143-74-8, 518-28-5, 4221-68-5, 115-39-9, 16423-68-0, 13473-26-2	61	325	4870	2.7	1	0.2303	0.0282
TOXCAST_ACTIVE	BSK_4H_SRB_down	8	10.53	0.0059	27955-94-8, 68392-35-8, 72-43-5, 79-94-7, 77-09-8, 77-40-7, 1478-61-1, 2971-36-0	18	241	1694	3.12	1	0.2357	0.0289
HTS_STRONGACTIVE	counter screen (cell viability):tox21-rar-viability-p1_viability_1	8	10.53	0.006	15086-94-9, 68047-06-3, 13473-26-2, 115-39-9, 1260-17-9, 76-60-8, 85-60-9, 15905-32-5	61	179	4870	3.57	1	0.2391	0.0293
TOXCAST_ACTIVE	BSK_SAg_CD40_down	9	11.84	0.006	27955-94-8, 68392-35-8, 72-43-5, 79-94-7, 77-09-8, 77-40-7, 80-05-7, 2971-36-0, 1478-61-1	18	310	1694	2.73	1	0.24	0.0294
MULTICASE_TOX_PREDICTION	MRP3 inhibition at 50uM	8	10.53	0.0061	1260-17-9, 33419-42-0, 14008-48-1, 115-33-3, 29767-20-2, 117091-64-2, 125-13-3, 126-00-1	67	1966	7882	0.48	1	0.24	0.0294
HTS_ACTIVE	sex hormone homeostasis:tox21-erb-bla-p1_erb-agonist_1	6	7.89	0.0061	1470-79-7, 620-92-8, 31127-54-5, 131-55-5, 131-54-4, 611-99-4	68	114	6512	5.04	1	0.2427	0.0297
HTS_ACTIVE	lipid homeostasis:tox21-ppard-bla-agonist-p1_ppard-agonist_1	6	7.89	0.0066	68047-06-3, 3236-71-3, 4162-45-2, 5613-46-7, 85-60-9, 1565-94-2	68	116	6512	4.95	1	0.2604	0.0319
TOXCAST_ACTIVE	BSK_BE3C_MIG_down	6	7.89	0.0067	68392-35-8, 77-09-8, 79-94-7, 27955-94-8, 2971-36-0, 81-90-3	18	128	1694	4.41	1	0.2647	0.0324
HTS_ACTIVE	neurotransmission:tox21-cre-antagonist-p1_cre-antagonist_1	9	11.84	0.007	1478-61-1, 518-47-8, 2971-36-0, 77-40-7, 61445-50-9, 27955-94-8, 14008-48-1, 517-28-2, 14868-03-2	68	276	6512	3.12	1	0.2746	0.0336
CTD_CHEMICALS_GENES	CYP11A1	4	5.26	0.0071	72-43-5, 2971-36-0, 80-05-7, 131-55-5	22	44	2273	9.39	1	0.2765	0.0339
MECHANISM	Inhibit DNA synthesis, repair, and function	4	5.26	0.0071	33419-42-0, 117091-64-2, 518-28-5, 29767-20-2	11	65	1530	8.56	1	0.2768	0.0339
TOXPRINT_STRUCTURE	chain:aromaticAlkane_Ph-C1_acyclic_connect_noDblBd	25	32.89	0.0071	5613-46-7, 80-05-7, 72-43-5, 79-94-7, 77-40-7, 2971-36-0, 620-92-8, 126-00-1, 85-60-9, 10040-45-6, 27955-94-8, 21850-44-2, 76-60-8, 79-97-0, 4162-45-2, 118-82-1, 1565-94-2, 6807-17-6, 1478-61-1, 25327-89-3, 603-50-9, 38103-06-9, 81-90-3, 125-31-5, 79-95-8	67	1808	8195	1.69	1	0.2768	0.0339
TOXCAST_ACTIVE	NVS_NR_bPR	5	6.58	0.0072	1478-61-1, 2971-36-0, 80-05-7, 77-40-7, 131-55-5	18	81	1694	5.81	1	0.2782	0.0341
TOXCAST_ACTIVE	NVS_NR_hCAR_Antagonist	5	6.58	0.0072	80-05-7, 81-90-3, 2971-36-0, 68392-35-8, 1478-61-1	18	81	1694	5.81	1	0.2782	0.0341
MESH	Spiro Compounds	3	3.95	0.0072	518-47-8, 15905-32-5, 13473-26-2	42	17	5355	22.5	1	0.2799	0.0343
TOXCAST_ACTIVE	BSK_LPS_SRB_down	8	10.53	0.0073	68392-35-8, 27955-94-8, 72-43-5, 77-09-8, 79-94-7, 2971-36-0, 1478-61-1, 77-40-7	18	250	1694	3.01	1	0.2804	0.0343
TOXPRINT_STRUCTURE	ring:hetero_[5]_O_dioxolane_(1_3-)	5	6.58	0.0073	6559-91-7, 518-28-5, 117091-64-2, 29767-20-2, 33419-42-0	67	96	8195	6.37	1	0.282	0.0345
LEADSCOPE_TOXICITY	Genetic Toxicity: SCE in vitro other cells	17	22.37	0.0076	569-57-3, 14868-03-2, 68392-35-8, 2624-43-3, 61445-50-9, 52479-85-3, 72-43-5, 131-55-5, 1470-79-7, 131-54-4, 603-50-9, 1260-17-9, 68047-06-3, 30299-08-2, 31127-54-5, 41351-30-8, 611-99-4	66	2958	7259	0.63	1	0.2901	0.0355
TOXCAST_ACTIVE	BSK_SAg_MCP1_down	8	10.53	0.0076	72-43-5, 27955-94-8, 68392-35-8, 77-40-7, 1478-61-1, 2971-36-0, 79-94-7, 77-09-8	18	252	1694	2.99	1	0.2911	0.0357
LEADSCOPE_TOXICITY	Rodent Carcinogenicity: carc rat male	15	19.74	0.0077	68392-35-8, 518-28-5, 68047-06-3, 1260-17-9, 14868-03-2, 569-57-3, 5613-46-7, 38103-06-9, 6559-91-7, 52479-85-3, 31127-54-5, 30299-08-2, 22345-47-7, 61445-50-9, 2624-43-3	66	768	7259	2.15	1	0.2943	0.0361
TOXCAST_ACTIVE	BSK_3C_Proliferation_down	10	13.16	0.0079	77-09-8, 131-55-5, 80-05-7, 79-94-7, 77-40-7, 2971-36-0, 1478-61-1, 27955-94-8, 68392-35-8, 72-43-5	18	399	1694	2.36	1	0.3031	0.0371
CTD_CHEMICALS_GOENRICH_CELLCOMP	GO:0005623|cell	6	7.89	0.0081	16423-68-0, 29767-20-2, 2971-36-0, 143-74-8, 67227-56-9, 79-95-8	14	810	1103	0.58	1	0.3057	0.0374
CTD_CHEMICALS_GOENRICH_CELLCOMP	GO:0044464|cell part	6	7.89	0.0081	79-95-8, 67227-56-9, 143-74-8, 2971-36-0, 16423-68-0, 29767-20-2	14	810	1103	0.58	1	0.3057	0.0374
MESH	Xanthenes	3	3.95	0.0081	13473-26-2, 518-47-8, 15905-32-5	42	18	5355	21.25	1	0.3068	0.0376
TOXPRINT_STRUCTURE	bond:C(=O)O_carboxylicEster_aromatic	8	10.53	0.0081	77-09-8, 15086-94-9, 13473-26-2, 27072-45-3, 518-47-8, 71-67-0, 129-16-8, 15905-32-5	67	288	8195	3.4	1	0.3075	0.0377
PHARMACTIONLIST	Specialty Uses of Chemicals	13	17.11	0.0082	76-60-8, 517-28-2, 72-43-5, 15905-32-5, 2321-07-05, 115-39-9, 71-67-0, 1260-17-9, 77-09-8, 143-74-8, 13473-26-2, 27072-45-3, 518-47-8	27	621	2720	2.11	1	0.311	0.0381
TOXCAST_ACTIVE	BSK_CASM3C_Proliferation_down	9	11.84	0.0083	72-43-5, 27955-94-8, 68392-35-8, 77-40-7, 80-05-7, 2971-36-0, 1478-61-1, 79-94-7, 77-09-8	18	326	1694	2.6	1	0.3125	0.0383
LEADSCOPE_TOXICITY	Genetic Toxicity: In vitro chrom. ab. other cells	2	2.63	0.0084	131-54-4, 41351-30-8	66	795	7259	0.28	1	0.3148	0.0386
TOXCAST_ACTIVE	BSK_BE3C_IL1a_down	6	7.89	0.0087	27955-94-8, 79-94-7, 77-09-8, 68392-35-8, 1478-61-1, 2971-36-0	18	136	1694	4.15	1	0.326	0.0399
TOXCAST_ACTIVE	OT_FXR_FXRSRC1_0480	9	11.84	0.0088	72-43-5, 79-95-8, 68392-35-8, 27955-94-8, 1478-61-1, 77-40-7, 80-05-7, 77-09-8, 79-94-7	18	329	1694	2.57	1	0.3287	0.0403
TOXCAST_ACTIVE	BSK_KF3CT_TIMP2_down	7	9.21	0.009	72-43-5, 27955-94-8, 68392-35-8, 2971-36-0, 1478-61-1, 79-94-7, 77-09-8	18	195	1694	3.38	1	0.3338	0.0409
TOXCAST_ACTIVE	BSK_3C_uPAR_down	8	10.53	0.009	77-40-7, 2971-36-0, 1478-61-1, 79-94-7, 77-09-8, 72-43-5, 27955-94-8, 68392-35-8	18	260	1694	2.9	1	0.3355	0.0411
TOXCAST_ACTIVE	BSK_4H_Pselectin_down	8	10.53	0.009	2971-36-0, 1478-61-1, 77-40-7, 77-09-8, 79-94-7, 72-43-5, 68392-35-8, 27955-94-8	18	260	1694	2.9	1	0.3355	0.0411
HTS_STRONGACTIVE	cytotoxicity:tox21-rt-viability-hek293-p1_viability@glo_40h_1	22	28.95	0.0091	61445-50-9, 6807-17-6, 1565-94-2, 33419-42-0, 4162-45-2, 79-97-0, 1943-97-1, 85-60-9, 77-40-7, 68047-06-3, 2971-36-0, 620-92-8, 518-28-5, 4221-68-5, 68392-35-8, 5613-46-7, 13080-86-9, 3236-71-3, 131-54-4, 603-50-9, 14868-03-2, 24038-68-4	61	998	4870	1.76	1	0.3355	0.0411
TOXCAST_ACTIVE	NVS_LGIC_rGluNMDA_Agonist	3	3.95	0.0092	1478-61-1, 77-40-7, 80-05-7	18	15	1694	18.82	1	0.3405	0.0417
CTD_CHEMICALS_DISEASES	Leiomyoma	6	7.89	0.0093	29767-20-2, 2971-36-0, 79-95-8, 85-60-9, 68392-35-8, 77-09-8	25	145	2583	4.28	1	0.3421	0.0419
LEADSCOPE_TOXICITY	Developmental Toxicity: visceral rodent	3	3.95	0.0094	125-13-3, 569-57-3, 14868-03-2	66	967	7259	0.34	1	0.347	0.0425
TOXPRINT_STRUCTURE	bond:CN_amine_ter-N_aliphatic	3	3.95	0.0098	31477-60-8, 68047-06-3, 68392-35-8	67	1106	8195	0.33	1	0.3594	0.044
HTS_ACTIVE	cytotoxicity:tox21-rt-viability-hepg2-p1_viability@flor_1	22	28.95	0.0098	6807-17-6, 61445-50-9, 1478-61-1, 118-82-1, 33419-42-0, 518-47-8, 13473-26-2, 15086-94-9, 139233-53-7, 85-60-9, 115-39-9, 68047-06-3, 79-94-7, 4221-68-5, 15905-32-5, 14008-48-1, 68392-35-8, 5613-46-7, 16423-68-0, 3236-71-3, 1571-75-1, 24038-68-4	68	1187	6512	1.77	1	0.3594	0.044
TOXPRINT_STRUCTURE	bond:CN_amine_ter-N_generic	3	3.95	0.0099	31477-60-8, 68047-06-3, 68392-35-8	67	1108	8195	0.33	1	0.3594	0.044
TOXCAST_ACTIVE	Tox21_p53_BLA_p3_ratio	7	9.21	0.0099	79-94-7, 2971-36-0, 131-55-5, 77-40-7, 68392-35-8, 27955-94-8, 79-95-8	18	199	1694	3.31	1	0.3594	0.044
CTD_CHEMICALS_GENES	GSTP1	5	6.58	0.0099	29767-20-2, 16423-68-0, 129-16-8, 77-09-8, 569-57-3	22	95	2273	5.44	1	0.3594	0.044
TOXCAST_ACTIVE	BSK_SAg_Proliferation_down	10	13.16	0.0099	80-05-7, 131-55-5, 77-09-8, 1478-61-1, 2971-36-0, 77-40-7, 79-94-7, 72-43-5, 68392-35-8, 27955-94-8	18	412	1694	2.28	1	0.3594	0.044
TOXPRINT_STRUCTURE	ring:aromatic_phenyl	3	3.95	0.0099	68392-35-8, 68047-06-3, 31477-60-8	67	1111	8195	0.33	1	0.3594	0.044
TOXCAST_ACTIVE	ATG_MRE_CIS_up	10	13.16	0.0103	1478-61-1, 77-40-7, 79-94-7, 79-95-8, 72-43-5, 68392-35-8, 27955-94-8, 16423-68-0, 80-05-7, 77-09-8	18	414	1694	2.27	1	0.3705	0.0454
TOXCAST_ACTIVE	BSK_LPS_Eselectin_down	7	9.21	0.0104	27955-94-8, 68392-35-8, 72-43-5, 79-94-7, 77-09-8, 1478-61-1, 2971-36-0	18	201	1694	3.28	1	0.374	0.0458
HTS_STRONGACTIVE	genotoxic stress:tox21-dt40-p1_dsb-inducer_1	5	6.58	0.0104	29767-20-2, 33419-42-0, 129-16-8, 15905-32-5, 117091-64-2	61	70	4870	5.7	1	0.3746	0.0459
TOXCAST_ACTIVE	BSK_hDFCGF_IP10_down	8	10.53	0.0105	79-94-7, 80-05-7, 77-40-7, 2971-36-0, 1478-61-1, 27955-94-8, 68392-35-8, 72-43-5	18	267	1694	2.82	1	0.3759	0.046
LEADSCOPE_TOXICITY	Rodent Carcinogenicity: SHE	17	22.37	0.0106	31127-54-5, 139233-53-7, 611-99-4, 41351-30-8, 1470-79-7, 131-55-5, 68047-06-3, 1260-17-9, 131-54-4, 52479-85-3, 61445-50-9, 517-28-2, 34487-61-1, 143-74-8, 68392-35-8, 14868-03-2, 569-57-3	66	2938	7259	0.64	1	0.3778	0.0463
HTS_ACTIVE	cytotoxicity:tox21-rt-viability-hepg2-p1_viability@flor_8h_1	14	18.42	0.0108	24038-68-4, 85-60-9, 518-47-8, 16423-68-0, 13473-26-2, 3236-71-3, 139233-53-7, 15086-94-9, 1571-75-1, 15905-32-5, 68392-35-8, 68047-06-3, 6807-17-6, 4221-68-5	68	621	6512	2.16	1	0.3848	0.0471
HTS_ACTIVE	cytotoxicity:tox21-rt-viability-hek293-p1_viability@flor_24h_1	18	23.68	0.0109	6807-17-6, 61445-50-9, 79-97-0, 13473-26-2, 518-47-8, 139233-53-7, 1943-97-1, 15086-94-9, 85-60-9, 68047-06-3, 843-55-0, 517-28-2, 15905-32-5, 68392-35-8, 16423-68-0, 131-54-4, 1571-75-1, 24038-68-4	68	894	6512	1.93	1	0.3882	0.0476
TOXCAST_ACTIVE	BSK_SAg_IL8_down	8	10.53	0.0109	79-94-7, 77-09-8, 77-40-7, 1478-61-1, 2971-36-0, 27955-94-8, 68392-35-8, 72-43-5	18	269	1694	2.8	1	0.3882	0.0476
LEADSCOPE_TOXICITY	Genetic Toxicity: chrom. ab.	13	17.11	0.0111	81-90-3, 80-05-7, 5613-46-7, 620-92-8, 1478-61-1, 2971-36-0, 77-40-7, 1565-94-2, 118-82-1, 72-43-5, 79-95-8, 79-97-0, 27955-94-8	66	621	7259	2.3	1	0.3947	0.0483
HTS_ACTIVE	thyroid homeostasis:tox21-gh3-tre-antagonist-p1_tr-antagonist_1	14	18.42	0.0112	79-95-8, 4162-45-2, 76-60-8, 68392-35-8, 115-39-9, 115-33-3, 518-28-5, 14868-03-2, 29767-20-2, 131-55-5, 129-16-8, 67227-56-9, 1943-97-1, 569-57-3	68	625	6512	2.15	1	0.3976	0.0487
CTD_CHEMICALS_GENES	THRA	3	3.95	0.0114	79-94-7, 131-55-5, 29767-20-2	22	18	2273	17.22	1	0.4018	0.0492
TOXCAST_ACTIVE	BSK_3C_TissueFactor_down	7	9.21	0.0114	27955-94-8, 68392-35-8, 79-94-7, 77-09-8, 131-55-5, 2971-36-0, 1478-61-1	18	205	1694	3.21	1	0.4025	0.0493
MODE_CLASS	Distorts /blocks macromolecular synthesis scaffold	4	5.26	0.0116	518-28-5, 29767-20-2, 117091-64-2, 33419-42-0	10	84	1476	7.03	1	0.4092	0.0501
TOXCAST_ACTIVE	ATG_PXRE_CIS_up	15	19.74	0.0125	80-05-7, 16423-68-0, 68392-35-8, 72-43-5, 79-94-7, 77-40-7, 115-39-9, 2971-36-0, 143-74-8, 77-09-8, 81-90-3, 27955-94-8, 79-95-8, 118-82-1, 1478-61-1	18	862	1694	1.64	1	0.4393	0.0538
TOXCAST_ACTIVE	BSK_LPS_MCSF_down	8	10.53	0.0128	77-09-8, 79-94-7, 1478-61-1, 2971-36-0, 77-40-7, 68392-35-8, 27955-94-8, 72-43-5	18	277	1694	2.72	1	0.4481	0.0549
TOXCAST_ACTIVE	BSK_hDFCGF_SRB_down	7	9.21	0.0128	79-94-7, 1478-61-1, 2971-36-0, 77-40-7, 68392-35-8, 27955-94-8, 72-43-5	18	210	1694	3.14	1	0.4481	0.0549
HTS_ACTIVE	cytotoxicity:tox21-rt-viability-hek293-p1_viability@flor_32h_1	18	23.68	0.0131	24038-68-4, 131-54-4, 1571-75-1, 16423-68-0, 68392-35-8, 517-28-2, 15905-32-5, 843-55-0, 68047-06-3, 85-60-9, 139233-53-7, 1943-97-1, 15086-94-9, 13473-26-2, 518-47-8, 79-97-0, 61445-50-9, 6807-17-6	68	925	6512	1.86	1	0.4561	0.0559
MULTICASE_TOX_PREDICTION	MRP5 substrates	21	27.63	0.0135	611-99-4, 117091-64-2, 41351-30-8, 15905-32-5, 15086-94-9, 518-47-8, 2624-43-3, 52479-85-3, 31127-54-5, 1565-94-2, 61445-50-9, 14868-03-2, 569-57-3, 131-54-4, 38103-06-9, 1260-17-9, 1470-79-7, 77-09-8, 27072-45-3, 131-55-5, 81-90-3	67	1387	7882	1.78	1	0.4702	0.0576
TOXCAST_ACTIVE	ATG_EGR_CIS_up	8	10.53	0.0136	16423-68-0, 80-05-7, 77-40-7, 77-09-8, 79-94-7, 79-95-8, 68392-35-8, 27955-94-8	18	280	1694	2.69	1	0.4719	0.0578
TOXCAST_ACTIVE	ATG_VDRE_CIS_up	11	14.47	0.0141	68392-35-8, 27955-94-8, 72-43-5, 79-95-8, 79-94-7, 1478-61-1, 2971-36-0, 77-40-7, 77-09-8, 16423-68-0, 80-05-7	18	505	1694	2.05	1	0.4876	0.0597
TOXCAST_ACTIVE	ATG_HSE_CIS_up	7	9.21	0.0144	79-95-8, 68392-35-8, 1478-61-1, 80-05-7, 131-55-5, 77-09-8, 79-94-7	18	215	1694	3.06	1	0.4961	0.0608
HTS_STRONGACTIVE	sex hormone homeostasis:tox21-erb-bla-p1_erb-agonist_1	5	6.58	0.0144	620-92-8, 1470-79-7, 131-55-5, 611-99-4, 31127-54-5	61	77	4870	5.18	1	0.4977	0.061
HTS_ACTIVE	counter screen (cell viability):tox21-vdr-bla-antagonist-p1_viability_1	21	27.63	0.0148	3236-71-3, 5613-46-7, 131-54-4, 14868-03-2, 2971-36-0, 68047-06-3, 115-39-9, 77-40-7, 79-94-7, 843-55-0, 14008-48-1, 72-43-5, 68392-35-8, 1943-97-1, 85-60-9, 6807-17-6, 1565-94-2, 4162-45-2, 79-95-8, 79-97-0, 76-60-8	68	1156	6512	1.74	1	0.5079	0.0622
TOXCAST_ACTIVE	BSK_LPS_CD40_down	8	10.53	0.0153	77-40-7, 1478-61-1, 2971-36-0, 79-94-7, 77-09-8, 72-43-5, 27955-94-8, 68392-35-8	18	286	1694	2.63	1	0.5205	0.0638
MESH	Etoposide	2	2.63	0.0153	33419-42-0, 117091-64-2	42	2	5355	127.5	1	0.5205	0.0638
MESH	Oxyphenisatin Acetate	2	2.63	0.0153	115-33-3, 125-13-3	42	2	5355	127.5	1	0.5205	0.0638
TOXPRINT_STRUCTURE	ring:fused_[6_6]_tetralin	5	6.58	0.0153	33419-42-0, 29767-20-2, 117091-64-2, 6559-91-7, 518-28-5	67	119	8195	5.14	1	0.5205	0.0638
TOXCAST_ACTIVE	BSK_KF3CT_SRB_down	6	7.89	0.0154	2971-36-0, 1478-61-1, 72-43-5, 68392-35-8, 79-94-7, 27955-94-8	18	156	1694	3.62	1	0.5237	0.0641
TOXCAST_ACTIVE	BSK_KF3CT_uPA_down	6	7.89	0.0154	79-94-7, 27955-94-8, 68392-35-8, 77-09-8, 2971-36-0, 1478-61-1	18	156	1694	3.62	1	0.5237	0.0641
CTD_GOSLIM_BIOPROCESS	GO:0021700|developmental maturation	8	10.53	0.0159	2971-36-0, 80-05-7, 518-28-5, 79-94-7, 79-95-8, 72-43-5, 33419-42-0, 68392-35-8	16	293	1491	2.54	1	0.5395	0.0661
TOXCAST_ACTIVE	NVS_GPCR_rOpiate_NonSelectiveNa	4	5.26	0.016	77-40-7, 80-05-7, 77-09-8, 1478-61-1	18	55	1694	6.84	1	0.5395	0.0661
CTD_CHEMICALS_GOENRICH_MOLFUNCT	GO:0005515|protein binding	7	9.21	0.0164	79-95-8, 143-74-8, 67227-56-9, 2971-36-0, 68392-35-8, 72-43-5, 29767-20-2	14	835	1090	0.65	1	0.5519	0.0676
TOXCAST_ACTIVE	BSK_SAg_CD38_down	8	10.53	0.0164	79-94-7, 77-09-8, 77-40-7, 2971-36-0, 1478-61-1, 27955-94-8, 68392-35-8, 72-43-5	18	290	1694	2.6	1	0.5536	0.0678
HTS_STRONGACTIVE	bile acid homeostasis:tox21-fxr-bla-antagonist-p1_fxr-antagonist_1	7	9.21	0.017	77-09-8, 569-57-3, 518-28-5, 27955-94-8, 14008-48-1, 4162-45-2, 125-13-3	61	169	4870	3.31	1	0.5707	0.0699
TOXCAST_ACTIVE	BSK_SAg_Eselectin_down	8	10.53	0.0174	27955-94-8, 68392-35-8, 72-43-5, 79-94-7, 77-09-8, 77-40-7, 2971-36-0, 1478-61-1	18	293	1694	2.57	1	0.5825	0.0714
HTS_ACTIVE	sterol homeostasis:tox21-ror-cho-antagonist-p1_ror-antgonist_1	19	25	0.0175	2624-43-3, 1565-94-2, 1478-61-1, 61445-50-9, 52479-85-3, 27955-94-8, 4162-45-2, 33419-42-0, 79-95-8, 569-57-3, 80-05-7, 38103-06-9, 34487-61-1, 14868-03-2, 518-28-5, 2971-36-0, 77-40-7, 14008-48-1, 517-28-2	68	1026	6512	1.77	1	0.5846	0.0716
TOXCAST_ACTIVE	NVS_NR_hPPARg	6	7.89	0.0175	79-94-7, 27955-94-8, 2971-36-0, 1478-61-1, 115-39-9, 79-95-8	18	161	1694	3.51	1	0.5857	0.0717
DRUGBANK_TRANSPORTERS	ABCC6	2	2.63	0.0176	29767-20-2, 33419-42-0	2	8	455	56.88	1	0.5861	0.0718
MULTICASE_TOX_PREDICTION	RCA fetal death, rat	25	32.89	0.0179	517-28-2, 72-43-5, 115-39-9, 77-40-7, 518-28-5, 79-94-7, 29767-20-2, 117091-64-2, 5613-46-7, 4162-45-2, 6559-91-7, 21850-44-2, 30299-08-2, 1565-94-2, 13473-26-2, 2624-43-3, 67227-56-9, 15086-94-9, 68392-35-8, 68047-06-3, 25327-89-3, 38103-06-9, 31477-60-8, 79-95-8, 33419-42-0	67	1824	7882	1.61	1	0.5943	0.0728
TOXCAST_ACTIVE	Tox21_p53_BLA_p5_ratio	7	9.21	0.0182	79-94-7, 77-40-7, 131-55-5, 1478-61-1, 2971-36-0, 68392-35-8, 79-95-8	18	226	1694	2.91	1	0.6035	0.0739
TOXCAST_ACTIVE	NVS_GPCR_h5HT7	5	6.58	0.0183	68392-35-8, 2971-36-0, 1478-61-1, 80-05-7, 77-40-7	18	106	1694	4.44	1	0.604	0.074
LEADSCOPE_TOXICITY	Human Adverse Hepatobiliary Effects: gall bladder	9	11.84	0.0183	85-60-9, 41351-30-8, 131-55-5, 31127-54-5, 125-31-5, 52479-85-3, 61445-50-9, 1260-17-9, 30299-08-2	66	376	7259	2.63	1	0.604	0.074
CTD_CHEMICALS_GENES	CETP	2	2.63	0.0184	29767-20-2, 33419-42-0	22	2	2273	103.32	1	0.604	0.074
CTD_CHEMICALS_GENES	RARRES2	2	2.63	0.0184	79-94-7, 79-95-8	22	2	2273	103.32	1	0.604	0.074
TOXCAST_ACTIVE	ATG_FXR_TRANS_up	4	5.26	0.0184	77-09-8, 80-05-7, 27955-94-8, 79-95-8	18	58	1694	6.49	1	0.604	0.074
CTD_GOSLIM_BIOPROCESS	GO:0051301|cell division	8	10.53	0.0185	68392-35-8, 33419-42-0, 518-28-5, 1565-94-2, 79-94-7, 143-74-8, 2971-36-0, 80-05-7	16	301	1491	2.48	1	0.604	0.074
CTD_CHEMICALS_GOENRICH_CELLCOMP	GO:0033646|host intracellular part	6	7.89	0.0185	79-94-7, 68392-35-8, 79-95-8, 80-05-7, 29767-20-2, 2971-36-0	14	143	1103	3.31	1	0.604	0.074
LEADSCOPE_TOXICITY	Neurotoxicity: pup behavior rat	5	6.58	0.0186	2971-36-0, 14868-03-2, 569-57-3, 118-82-1, 1943-97-1	66	1207	7259	0.46	1	0.6079	0.0745
DRUGBANK_ATC	Podophyllotoxin derivatives	2	2.63	0.0189	29767-20-2, 33419-42-0	13	2	1261	97	1	0.6176	0.0756
LEADSCOPE_TOXICITY	Neurotoxicity: pup behavior mouse	2	2.63	0.019	1565-94-2, 2971-36-0	66	713	7259	0.31	1	0.6182	0.0757
TOXCAST_ACTIVE	BSK_hDFCGF_CollagenIII_down	8	10.53	0.0193	27955-94-8, 68392-35-8, 79-94-7, 77-09-8, 77-40-7, 80-05-7, 2971-36-0, 1478-61-1	18	299	1694	2.52	1	0.628	0.0769
CTD_CHEMICALS_GOENRICH_CELLCOMP	GO:0033643|host cell part	6	7.89	0.0195	79-94-7, 68392-35-8, 79-95-8, 80-05-7, 29767-20-2, 2971-36-0	14	145	1103	3.26	1	0.6323	0.0774
TOXCAST_ACTIVE	APR_HepG2_CellLoss_72h_dn	10	13.16	0.0196	80-05-7, 131-55-5, 81-90-3, 77-09-8, 72-43-5, 27955-94-8, 1478-61-1, 2971-36-0, 77-40-7, 79-94-7	18	426	1694	2.21	1	0.6323	0.0774
TOXCAST_ACTIVE	BSK_hDFCGF_Proliferation_down	10	13.16	0.0197	77-09-8, 80-05-7, 79-94-7, 1478-61-1, 2971-36-0, 77-40-7, 1260-17-9, 68392-35-8, 27955-94-8, 72-43-5	18	427	1694	2.2	1	0.6344	0.0777
TOXCAST_ACTIVE	BSK_CASM3C_MCSF_down	6	7.89	0.0198	68392-35-8, 79-94-7, 27955-94-8, 2971-36-0, 72-43-5, 77-40-7	18	166	1694	3.4	1	0.6389	0.0783
CTD_CHEMICALS_GOENRICH_CELLCOMP	GO:0042025|host cell nucleus	6	7.89	0.0201	29767-20-2, 2971-36-0, 79-95-8, 72-43-5, 68392-35-8, 79-94-7	14	146	1103	3.24	1	0.6447	0.079
CTD_CHEMICALS_GOENRICH_CELLCOMP	GO:0043656|intracellular region of host	6	7.89	0.0201	80-05-7, 79-95-8, 29767-20-2, 2971-36-0, 79-94-7, 68392-35-8	14	146	1103	3.24	1	0.6447	0.079
HTS_ACTIVE	counter screen (cell viability):tox21-cre-agonist-p1_viability_1	14	18.42	0.0202	3236-71-3, 5613-46-7, 603-50-9, 1943-97-1, 24038-68-4, 85-60-9, 115-39-9, 68047-06-3, 6807-17-6, 1565-94-2, 4221-68-5, 4162-45-2, 72-43-5, 76-60-8	68	641	6512	2.09	1	0.6449	0.079
PHARMACTIONLIST	Therapeutic Uses	13	17.11	0.0202	22345-47-7, 68392-35-8, 68047-06-3, 603-50-9, 569-57-3, 125-13-3, 2624-43-3, 10040-45-6, 67227-56-9, 518-28-5, 115-33-3, 117091-64-2, 29767-20-2	27	1851	2720	0.71	1	0.6449	0.079
MULTICASE_TOX_PREDICTION	MDR1 substrates	9	11.84	0.0204	31477-60-8, 38103-06-9, 68392-35-8, 1260-17-9, 68047-06-3, 33419-42-0, 29767-20-2, 117091-64-2, 1565-94-2	67	1899	7882	0.56	1	0.6511	0.0797
LEADSCOPE_TOXICITY	Developmental Toxicity: visceral rat	3	3.95	0.0205	85-60-9, 125-31-5, 1260-17-9	66	881	7259	0.37	1	0.6511	0.0797
TOXPRINT_STRUCTURE	ring:hetero_[6]_N_pyridine_generic	3	3.95	0.0206	603-50-9, 10040-45-6, 139233-53-7	67	976	8195	0.38	1	0.6547	0.0802
TOXCAST_ACTIVE	BSK_3C_SRB_down	8	10.53	0.0208	72-43-5, 68392-35-8, 27955-94-8, 1478-61-1, 2971-36-0, 77-40-7, 77-09-8, 79-94-7	18	303	1694	2.48	1	0.6578	0.0806
MULTICASE_TOX_PREDICTION	RCA fetal growth retardation, rodent	12	15.79	0.0209	41351-30-8, 13473-26-2, 10040-45-6, 38103-06-9, 603-50-9, 14008-48-1, 72-43-5, 21850-44-2, 52479-85-3, 61445-50-9, 1565-94-2, 115-33-3	67	646	7882	2.19	1	0.6592	0.0807
TOXPRINT_STRUCTURE	chain:alkaneBranch_isopropyl_C3	3	3.95	0.0209	21850-44-2, 6807-17-6, 1565-94-2	67	992	8195	0.37	1	0.6592	0.0807
TOXCAST_ACTIVE	NVS_GPCR_p5HT2C	4	5.26	0.0211	1478-61-1, 77-40-7, 131-55-5, 80-05-7	18	61	1694	6.17	1	0.6641	0.0813
CTD_CHEMICALS_PATHWAYS	REACT:R-HSA-2219528|PI3K/AKT Signaling in Cancer	3	3.95	0.0211	33419-42-0, 518-28-5, 79-94-7	12	20	939	11.74	1	0.6647	0.0814
HTS_STRONGACTIVE	cytotoxicity:tox21-rt-viability-hek293-p1_viability@flor_16h_1	8	10.53	0.0214	15905-32-5, 15086-94-9, 6807-17-6, 61445-50-9, 68047-06-3, 13473-26-2, 16423-68-0, 518-47-8	61	229	4870	2.79	1	0.6721	0.0823
HTS_ACTIVE	sex hormone homeostasis:tox21-er-luc-bg1-4e2-antagonist-p1_er-antagonist_1	12	15.79	0.0216	518-28-5, 1478-61-1, 2971-36-0, 68047-06-3, 77-40-7, 6559-91-7, 68392-35-8, 4162-45-2, 33419-42-0, 569-57-3, 1943-97-1, 29767-20-2	68	530	6512	2.17	1	0.6777	0.083
LEADSCOPE_TOXICITY	Genetic Toxicity: s. cerevisiae	16	21.05	0.0218	143-74-8, 139233-53-7, 131-55-5, 1470-79-7, 61445-50-9, 30299-08-2, 125-31-5, 52479-85-3, 31127-54-5, 131-54-4, 611-99-4, 34487-61-1, 41351-30-8, 1260-17-9, 115-39-9, 517-28-2	66	917	7259	1.92	1	0.6826	0.0836
TOXCAST_ACTIVE	BSK_LPS_IL8_down	7	9.21	0.0222	72-43-5, 27955-94-8, 68392-35-8, 2971-36-0, 1478-61-1, 79-94-7, 77-09-8	18	236	1694	2.79	1	0.6939	0.085
MESH	Phenolphthaleins	2	2.63	0.0228	77-09-8, 143-74-8	42	3	5355	85	1	0.71	0.087
CTD_CHEMICALS_DISEASES	Respiratory Sounds	4	5.26	0.0229	77-09-8, 569-57-3, 29767-20-2, 129-16-8	25	67	2583	6.17	1	0.7109	0.0871
TOXCAST_ACTIVE	Tox21_p53_BLA_p2_ratio	7	9.21	0.0231	79-95-8, 68392-35-8, 27955-94-8, 2971-36-0, 131-55-5, 77-40-7, 79-94-7	18	238	1694	2.77	1	0.7173	0.0879
CTD_CHEMICALS_DISEASES	Adrenal Insufficiency	3	3.95	0.0235	79-95-8, 2971-36-0, 131-55-5	25	26	2583	11.92	1	0.7269	0.089
TOXCAST_ACTIVE	BSK_LPS_PGE2_down	7	9.21	0.024	79-94-7, 80-05-7, 77-40-7, 1478-61-1, 2971-36-0, 27955-94-8, 68392-35-8	18	240	1694	2.74	1	0.7414	0.0908
TOXPRINT_STRUCTURE	bond:CX_halide_aromatic-X_ether_aromatic_(Ph-O-Ph)_generic	3	3.95	0.024	15905-32-5, 15086-94-9, 13473-26-2	67	30	8195	12.23	1	0.7414	0.0908
TOXCAST_ACTIVE	Tox21_p53_BLA_p2_viability	5	6.58	0.0248	79-94-7, 27955-94-8, 68392-35-8, 79-95-8, 2971-36-0	18	116	1694	4.06	1	0.7623	0.0934
TOXCAST_ACTIVE	NVS_ADME_hCYP4F12	3	3.95	0.0248	2971-36-0, 80-05-7, 1478-61-1	18	25	1694	11.29	1	0.7631	0.0935
TOXCAST_ACTIVE	BSK_KF3CT_IL1a_down	6	7.89	0.0251	77-09-8, 79-94-7, 1478-61-1, 2971-36-0, 68392-35-8, 72-43-5	18	176	1694	3.21	1	0.7685	0.0941
HTS_ACTIVE	autofluorescence:tox21-spec-hek293-p1_autofluor@med-blue-n_1	11	14.47	0.0251	61445-50-9, 52479-85-3, 6559-91-7, 31127-54-5, 15905-32-5, 517-28-2, 15086-94-9, 139233-53-7, 129-16-8, 131-55-5, 13473-26-2	68	458	6512	2.3	1	0.7689	0.0942
CTD_CHEMICALS_DISEASES	HYPOTHYROIDISM, CONGENITAL, NONGOITROUS, 6	3	3.95	0.0252	79-95-8, 29767-20-2, 131-55-5	25	27	2583	11.48	1	0.7702	0.0943
LEADSCOPE_TOXICITY	Reproductive Toxicity: repro rat male	14	18.42	0.0255	5613-46-7, 38103-06-9, 14868-03-2, 1260-17-9, 71-67-0, 115-39-9, 517-28-2, 77-09-8, 139233-53-7, 85-60-9, 118-82-1, 76-60-8, 79-97-0, 21850-44-2	66	787	7259	1.96	1	0.7771	0.0952
TOXCAST_ACTIVE	BSK_4H_Eotaxin3_down	7	9.21	0.0259	72-43-5, 68392-35-8, 27955-94-8, 2971-36-0, 1478-61-1, 77-09-8, 79-94-7	18	244	1694	2.7	1	0.7888	0.0966
TOXCAST_ACTIVE	NVS_NR_hPXR	5	6.58	0.0262	79-95-8, 80-05-7, 77-40-7, 115-39-9, 68392-35-8	18	118	1694	3.99	1	0.796	0.0975
TOXCAST_ACTIVE	BSK_KF3CT_TGFb1_down	6	7.89	0.0268	77-09-8, 79-94-7, 2971-36-0, 1478-61-1, 68392-35-8, 27955-94-8	18	179	1694	3.15	1	0.8122	0.0995
TOXCAST_ACTIVE	Tox21_FXR_BLA_antagonist_ratio	8	10.53	0.0271	27955-94-8, 79-95-8, 72-43-5, 77-09-8, 79-94-7, 2971-36-0, 1478-61-1, 16423-68-0	18	319	1694	2.36	1	0.8215	0.1006
TOXCAST_ACTIVE	APR_HepG2_MitoMembPot_24h_dn	6	7.89	0.0274	27955-94-8, 79-94-7, 77-40-7, 131-55-5, 80-05-7, 1260-17-9	18	180	1694	3.14	1	0.8271	0.1013
CTD_CHEMICALS_GENES	DICER1	2	2.63	0.0275	79-95-8, 79-94-7	22	3	2273	68.88	1	0.8279	0.1014
HTS_STRONGACTIVE	development:tox21-shh-3t3-gli3-antagonist-p1_shh-antagonist_1	16	21.05	0.0276	131-55-5, 1943-97-1, 4162-45-2, 33419-42-0, 79-97-0, 1478-61-1, 61445-50-9, 14868-03-2, 611-99-4, 80-05-7, 13080-86-9, 603-50-9, 1571-75-1, 72-43-5, 2971-36-0, 518-28-5	61	712	4870	1.79	1	0.8279	0.1014
DRUGBANK_ATC_CODE	Antineoplastic Agents, Phytogenic	2	2.63	0.0276	33419-42-0, 518-28-5	4	6	648	54	1	0.8279	0.1014
LEADSCOPE_TOXICITY	Genetic Toxicity: SCE in vitro	9	11.84	0.0277	611-99-4, 41351-30-8, 61445-50-9, 52479-85-3, 31127-54-5, 13473-26-2, 1260-17-9, 131-55-5, 1470-79-7	66	1739	7259	0.57	1	0.8316	0.1019
CTD_CHEMICALS_DISEASES	Sarcoma	7	9.21	0.0278	33419-42-0, 29767-20-2, 129-16-8, 16423-68-0, 79-94-7, 569-57-3, 77-09-8	25	260	2583	2.78	1	0.8326	0.102
TOXPRINT_STRUCTURE	ring:hetero_[5]_Z_1_2-Z	5	6.58	0.0285	143-74-8, 34487-61-1, 125-31-5, 76-60-8, 115-39-9	67	144	8195	4.25	1	0.8502	0.1041
TOXCAST_ACTIVE	Tox21_HSE_BLA_agonist_ratio	6	7.89	0.0286	68392-35-8, 79-94-7, 1478-61-1, 16423-68-0, 2971-36-0, 131-55-5	18	182	1694	3.1	1	0.8522	0.1044
CTD_CHEMICALS_DISEASES	Progesterone Resistance	4	5.26	0.0286	143-74-8, 79-95-8, 31477-60-8, 29767-20-2	25	73	2583	5.66	1	0.8522	0.1044
MULTICASE_TOX_PREDICTION	MRP3 inhibition at 10uM	7	9.21	0.0291	68047-06-3, 68392-35-8, 31477-60-8, 115-33-3, 14008-48-1, 41351-30-8, 125-13-3	67	1581	7882	0.52	1	0.8651	0.106
CTD_CHEMICALS_GOENRICH_MOLFUNCT	GO:0003712|transcription coregulator activity	7	9.21	0.0292	518-28-5, 79-94-7, 2971-36-0, 80-05-7, 68392-35-8, 79-95-8, 33419-42-0	14	218	1090	2.5	1	0.8661	0.1061
HTS_STRONGACTIVE	cytotoxicity:tox21-rt-viability-hek293-p1_viability@flor_40h_1	9	11.84	0.0294	518-47-8, 16423-68-0, 68047-06-3, 13473-26-2, 6807-17-6, 15086-94-9, 85-60-9, 15905-32-5, 68392-35-8	61	300	4870	2.4	1	0.8698	0.1065
TOXPRINT_STRUCTURE	bond:C(=O)O_carboxylicAcid_generic	4	5.26	0.0294	81-90-3, 126-00-1, 30299-08-2, 16423-68-0	67	1133	8195	0.43	1	0.8698	0.1065
TOXCAST_ACTIVE	Tox21_p53_BLA_p1_ratio	6	7.89	0.0298	79-94-7, 2971-36-0, 1478-61-1, 68392-35-8, 27955-94-8, 79-95-8	18	184	1694	3.07	1	0.879	0.1077
CTD_CHEMICALS_GOENRICH_CELLCOMP	GO:0044216|other organism cell	6	7.89	0.0299	29767-20-2, 2971-36-0, 79-95-8, 80-05-7, 68392-35-8, 79-94-7	14	161	1103	2.94	1	0.879	0.1077
CTD_CHEMICALS_GENES	CYP19A1	4	5.26	0.0299	16423-68-0, 2971-36-0, 80-05-7, 72-43-5	22	75	2273	5.51	1	0.8795	0.1077
CTD_CHEMICALS_DISEASES	Peripheral Nervous System Diseases	8	10.53	0.0306	77-09-8, 569-57-3, 518-28-5, 79-94-7, 16423-68-0, 129-16-8, 29767-20-2, 33419-42-0	25	341	2583	2.42	1	0.8977	0.11
CTD_CHEMICALS_DISEASES	Vestibular Diseases	4	5.26	0.0307	29767-20-2, 77-09-8, 569-57-3, 129-16-8	25	75	2583	5.51	1	0.8991	0.1101
CTD_CHEMICALS_DISEASES	Musculoskeletal Pain	6	7.89	0.031	29767-20-2, 85-60-9, 77-09-8, 1565-94-2, 79-94-7, 131-55-5	25	196	2583	3.16	1	0.905	0.1108
CTD_CHEMICALS_DISEASES	Ureteral Calculi	7	9.21	0.0313	72-43-5, 29767-20-2, 77-09-8, 569-57-3, 129-16-8, 30299-08-2, 16423-68-0	25	267	2583	2.71	1	0.9111	0.1116
CTD_CHEMICALS_GOENRICH_MOLFUNCT	GO:0042277|peptide binding	6	7.89	0.0313	80-05-7, 72-43-5, 33419-42-0, 79-94-7, 68392-35-8, 518-28-5	14	161	1090	2.9	1	0.9111	0.1116
CTD_CHEMICALS_GOENRICH_CELLCOMP	GO:0018995|host	6	7.89	0.0321	79-94-7, 68392-35-8, 79-95-8, 80-05-7, 2971-36-0, 29767-20-2	14	164	1103	2.88	1	0.9323	0.1142
CTD_CHEMICALS_GOENRICH_CELLCOMP	GO:0043657|host cell	6	7.89	0.0321	68392-35-8, 79-94-7, 29767-20-2, 2971-36-0, 79-95-8, 80-05-7	14	164	1103	2.88	1	0.9323	0.1142
LEADSCOPE_TOXICITY	Developmental Toxicity: weight dec. mouse	15	19.74	0.0328	518-28-5, 1260-17-9, 611-99-4, 34487-61-1, 117091-64-2, 29767-20-2, 1565-94-2, 22345-47-7, 61445-50-9, 52479-85-3, 33419-42-0, 31127-54-5, 143-74-8, 131-55-5, 1470-79-7	66	881	7259	1.87	1	0.9484	0.1162
CTD_CHEMICALS_DISEASES	MIGRAINE WITH OR WITHOUT AURA, SUSCEPTIBILITY TO, 1	8	10.53	0.0329	68392-35-8, 79-95-8, 72-43-5, 2971-36-0, 29767-20-2, 85-60-9, 77-09-8, 131-55-5	25	346	2583	2.39	1	0.9504	0.1164
HTS_ACTIVE	skin sensitization:tox21-ks-are-p1_nrf2-agonist_1	17	22.37	0.0331	14868-03-2, 603-50-9, 131-54-4, 3236-71-3, 72-43-5, 518-28-5, 115-33-3, 79-94-7, 2971-36-0, 2624-43-3, 131-55-5, 125-13-3, 79-95-8, 31127-54-5, 33419-42-0, 1565-94-2, 6807-17-6	68	928	6512	1.75	1	0.9556	0.117
CTD_CHEMICALS_DISEASES	Idiopathic Pulmonary Fibrosis	6	7.89	0.0334	85-60-9, 79-95-8, 72-43-5, 1565-94-2, 77-09-8, 131-55-5	25	200	2583	3.1	1	0.9632	0.118
TOXCAST_ACTIVE	Tox21_Aromatase_Inhibition	9	11.84	0.0339	1260-17-9, 2971-36-0, 1478-61-1, 115-39-9, 79-94-7, 79-95-8, 27955-94-8, 68392-35-8, 16423-68-0	18	378	1694	2.24	1	0.9733	0.1192
THERAPEUTIC_CLASS	Laxatives	2	2.63	0.034	603-50-9, 125-13-3	11	5	1452	52.8	1	0.9761	0.1196
TOXCAST_ACTIVE	NVS_TR_hDAT	6	7.89	0.0345	1478-61-1, 2971-36-0, 80-05-7, 77-40-7, 77-09-8, 68392-35-8	18	191	1694	2.96	1	0.9858	0.1207
CTD_CHEMICALS_GOENRICH_CELLCOMP	GO:0044215|other organism	6	7.89	0.0345	79-95-8, 80-05-7, 29767-20-2, 2971-36-0, 79-94-7, 68392-35-8	14	167	1103	2.83	1	0.9858	0.1207
MESH	Naphthalenes	4	5.26	0.0345	33419-42-0, 117091-64-2, 518-28-5, 6559-91-7	42	94	5355	5.43	1	0.9858	0.1207
MULTICASE_TOX_PREDICTION	Allergic contact dermatitis, guinea pig and human	46	60.53	0.0347	118-82-1, 6807-17-6, 61445-50-9, 27955-94-8, 6559-91-7, 52479-85-3, 79-97-0, 125-13-3, 1943-97-1, 10040-45-6, 126-00-1, 77-40-7, 517-28-2, 3236-71-3, 34487-61-1, 29767-20-2, 22345-47-7, 33419-42-0, 143-74-8, 27072-45-3, 68392-35-8, 14868-03-2, 1478-61-1, 31127-54-5, 139233-53-7, 67227-56-9, 518-47-8, 85-60-9, 518-28-5, 2971-36-0, 620-92-8, 80-05-7, 16423-68-0, 117091-64-2, 611-99-4, 125-31-5, 77-…	67	4348	7882	1.24	1	0.9858	0.1207
HTS_ACTIVE	xenobiotic homeostasis:tox21-p450-2d6-p1_2d6-inhibitor_1	39	51.32	0.0347	33419-42-0, 143-74-8, 24038-68-4, 4162-45-2, 52479-85-3, 79-97-0, 27955-94-8, 61445-50-9, 1565-94-2, 13473-26-2, 2624-43-3, 1943-97-1, 15086-94-9, 517-28-2, 72-43-5, 15905-32-5, 115-39-9, 4221-68-5, 34487-61-1, 3236-71-3, 5613-46-7, 1470-79-7, 131-55-5, 68047-06-3, 1260-17-9, 843-55-0, 38103-06-9, 603-50-9, 131-54-4, 76-60-8, 1478-61-1, 85-60-9, 67227-56-9, 139233-53-7, 620-92-8, 518-28-5, 611-99…	68	2834	6512	1.32	1	0.9858	0.1207
CTD_CHEMICALS_GOENRICH_MOLFUNCT	GO:0003714|transcription corepressor activity	4	5.26	0.0347	80-05-7, 33419-42-0, 68392-35-8, 518-28-5	14	63	1090	4.94	1	0.986	0.1208
TOXCAST_ACTIVE	NVS_ENZ_hFGFR1	3	3.95	0.035	131-55-5, 27955-94-8, 2971-36-0	18	30	1694	9.41	1	0.9913	0.1214
HTS_ACTIVE	steroidogenesis:tox21-aromatase-p1_aromatase-inhibitor_1	8	10.53	0.0352	4162-45-2, 68392-35-8, 68047-06-3, 61445-50-9, 569-57-3, 1565-94-2, 139233-53-7, 1943-97-1	68	303	6512	2.53	1	0.9947	0.1218
TOXCAST_ACTIVE	BSK_SAg_PBMCCytotoxicity_down	6	7.89	0.0359	72-43-5, 68392-35-8, 2971-36-0, 1478-61-1, 77-40-7, 79-94-7	18	193	1694	2.93	1	1	0.1242
CTD_CHEMICALS_GOENRICH_CELLCOMP	GO:0044217|other organism part	6	7.89	0.037	68392-35-8, 79-94-7, 2971-36-0, 29767-20-2, 79-95-8, 80-05-7	14	170	1103	2.78	1	1	0.1279
HTS_STRONGACTIVE	steroidogenesis:tox21-aromatase-p1_aromatase-inhibitor_1	6	7.89	0.0373	1943-97-1, 68392-35-8, 1565-94-2, 569-57-3, 68047-06-3, 4162-45-2	61	151	4870	3.17	1	1	0.1287
MESH	Tosyl Compounds	2	2.63	0.0377	76-60-8, 115-39-9	42	5	5355	51	1	1	0.1298
CTD_CHEMICALS_PATHWAYS	REACT:R-HSA-5663202|Diseases of signal transduction	7	9.21	0.0379	80-05-7, 2971-36-0, 79-94-7, 518-28-5, 72-43-5, 33419-42-0, 68392-35-8	12	241	939	2.27	1	1	0.1302
TOXCAST_ACTIVE	BSK_LPS_IL1a_down	6	7.89	0.0381	79-94-7, 2971-36-0, 1478-61-1, 27955-94-8, 68392-35-8, 72-43-5	18	196	1694	2.88	1	1	0.1306
HTS_STRONGACTIVE	counter screen (cell viability):tox21-ar-mda-kb2-luc-antagonist-p1_viability_1	7	9.21	0.0383	15905-32-5, 85-60-9, 76-60-8, 13473-26-2, 16423-68-0, 15086-94-9, 1565-94-2	61	204	4870	2.74	1	1	0.1313
HTS_STRONGACTIVE	cell viability:tox21-dt40-p1_viability@657_1	24	31.58	0.0385	518-28-5, 843-55-0, 115-39-9, 68047-06-3, 77-40-7, 68392-35-8, 517-28-2, 569-57-3, 603-50-9, 16423-68-0, 31477-60-8, 5613-46-7, 117091-64-2, 29767-20-2, 1565-94-2, 61445-50-9, 6807-17-6, 76-60-8, 79-97-0, 52479-85-3, 6559-91-7, 4162-45-2, 33419-42-0, 85-60-9	61	1279	4870	1.5	1	1	0.1315
MULTICASE_TOX_PREDICTION	MRP3 substrates	18	23.68	0.0389	131-55-5, 81-90-3, 518-47-8, 27072-45-3, 126-00-1, 1470-79-7, 61445-50-9, 30299-08-2, 22345-47-7, 6559-91-7, 33419-42-0, 131-54-4, 16423-68-0, 117091-64-2, 41351-30-8, 29767-20-2, 518-28-5, 1260-17-9	67	1235	7882	1.71	1	1	0.1326
TOXCAST_ACTIVE	BSK_LPS_TNFa_down	6	7.89	0.0411	79-94-7, 77-09-8, 1478-61-1, 27955-94-8, 68392-35-8, 72-43-5	18	200	1694	2.82	1	1	0.1401
HTS_ACTIVE	autofluorescence:tox21-spec-hepg2-p1_autofluor@cell-blue-n_1	10	13.16	0.0412	61445-50-9, 15905-32-5, 31127-54-5, 6559-91-7, 52479-85-3, 518-47-8, 13473-26-2, 131-55-5, 129-16-8, 15086-94-9	68	431	6512	2.22	1	1	0.1401
LEADSCOPE_TOXICITY	Human Adverse Cardiological Effects: conduction	2	2.63	0.0413	1565-94-2, 4162-45-2	66	612	7259	0.36	1	1	0.1401
LEADSCOPE_TOXICITY	Human Adverse Cardiological Effects: QT prolongation	2	2.63	0.0414	603-50-9, 1565-94-2	66	615	7259	0.36	1	1	0.1401
HTS_ACTIVE	mineral homeostatsis:tox21-vdr-bla-antagonist-p1_vdr-antagonist_1	6	7.89	0.0418	611-99-4, 27955-94-8, 14008-48-1, 517-28-2, 518-28-5, 518-47-8	68	186	6512	3.09	1	1	0.1415
TOXPRINT_STRUCTURE	bond:C(=O)O_carboxylicAcid_alkyl	2	2.63	0.0423	30299-08-2, 126-00-1	67	699	8195	0.35	1	1	0.143
TOXCAST_ACTIVE	BSK_3C_VCAM1_down	6	7.89	0.0427	68392-35-8, 72-43-5, 79-94-7, 77-09-8, 2971-36-0, 1478-61-1	18	202	1694	2.8	1	1	0.1438
TOXCAST_ACTIVE	NVS_NR_hPPARa	4	5.26	0.0427	1478-61-1, 79-94-7, 79-95-8, 80-05-7	18	80	1694	4.71	1	1	0.1438
TOXPRINT_STRUCTURE	bond:CC(=O)C_ketone_aromatic_aliphatic	8	10.53	0.0429	131-55-5, 131-54-4, 41351-30-8, 1470-79-7, 611-99-4, 61445-50-9, 31127-54-5, 52479-85-3	67	404	8195	2.42	1	1	0.1441
CTD_CHEMICALS_DISEASES	Disease Models, Animal	10	13.16	0.0432	2971-36-0, 518-28-5, 1565-94-2, 79-95-8, 67227-56-9, 131-55-5, 143-74-8, 77-09-8, 85-60-9, 29767-20-2	25	525	2583	1.97	1	1	0.1444
HTS_ACTIVE	energy homeostasis:tox21-pgc-err-p1_pgc-err-antagonist_1	2	2.63	0.0432	569-57-3, 1565-94-2	68	556	6512	0.34	1	1	0.1444
HTS_STRONGACTIVE	counter screen (cell viability):tox21-nfkb-bla-agonist-p1_viability_1	5	6.58	0.0432	115-33-3, 603-50-9, 85-60-9, 125-13-3, 3236-71-3	61	108	4870	3.7	1	1	0.1444
MULTICASE_TOX_PREDICTION	RCA newborn behavioral toxicity, mouse	2	2.63	0.0433	72-43-5, 2971-36-0	67	684	7882	0.34	1	1	0.1446
TOXCAST_ACTIVE	BSK_CASM3C_uPAR_down	5	6.58	0.0435	27955-94-8, 79-94-7, 68392-35-8, 131-55-5, 2971-36-0	18	138	1694	3.41	1	1	0.145
TOXCAST_ACTIVE	NVS_ENZ_hMMP9	3	3.95	0.0441	1260-17-9, 72-43-5, 2971-36-0	18	34	1694	8.3	1	1	0.1465
HTS_ACTIVE	autofluorescence:autofluor@med-blue-n_1	12	15.79	0.0442	131-55-5, 129-16-8, 518-47-8, 13473-26-2, 15086-94-9, 139233-53-7, 61445-50-9, 15905-32-5, 31127-54-5, 517-28-2, 52479-85-3, 6559-91-7	68	563	6512	2.04	1	1	0.1467
TOXCAST_ACTIVE	BSK_hDFCGF_MCSF_down	7	9.21	0.0456	79-94-7, 1260-17-9, 1478-61-1, 2971-36-0, 27955-94-8, 68392-35-8, 72-43-5	18	277	1694	2.38	1	1	0.1511
HTS_ACTIVE	cytotoxicity:tox21-rt-viability-hek293-p1_viability@flor_0h_1	6	7.89	0.046	15905-32-5, 15086-94-9, 13473-26-2, 518-47-8, 16423-68-0, 61445-50-9	68	191	6512	3.01	1	1	0.1523
TOXCAST_ACTIVE	BSK_4H_VEGFRII_down	5	6.58	0.0466	2971-36-0, 1478-61-1, 72-43-5, 68392-35-8, 77-09-8	18	141	1694	3.34	1	1	0.1536
TOXCAST_ACTIVE	BSK_BE3C_tPA_down	5	6.58	0.0466	1478-61-1, 2971-36-0, 27955-94-8, 79-94-7, 68392-35-8	18	141	1694	3.34	1	1	0.1536
TOXCAST_ACTIVE	NVS_GPCR_h5HT5A	4	5.26	0.0469	1478-61-1, 68392-35-8, 2971-36-0, 77-40-7	18	83	1694	4.54	1	1	0.1544
HTS_STRONGACTIVE	cytotoxicity:tox21-rt-viability-hepg2-p1_viability@flor_0h_1	5	6.58	0.047	15086-94-9, 13473-26-2, 16423-68-0, 518-47-8, 15905-32-5	61	111	4870	3.6	1	1	0.1545
HTS_ACTIVE	autofluorescence:autofluor@med-blue-n_2	12	15.79	0.0472	129-16-8, 131-55-5, 13473-26-2, 518-47-8, 15086-94-9, 139233-53-7, 61445-50-9, 31127-54-5, 15905-32-5, 517-28-2, 52479-85-3, 6559-91-7	68	579	6512	1.98	1	1	0.1548
CTD_CHEMICALS_GOENRICH_CELLCOMP	GO:0031974|membrane-enclosed lumen	12	15.79	0.0476	2971-36-0, 79-94-7, 1565-94-2, 518-28-5, 33419-42-0, 72-43-5, 79-95-8, 68392-35-8, 131-55-5, 67227-56-9, 143-74-8, 29767-20-2	14	619	1103	1.53	1	1	0.1553
CTD_CHEMICALS_GOENRICH_CELLCOMP	GO:0043233|organelle lumen	12	15.79	0.0476	143-74-8, 67227-56-9, 131-55-5, 29767-20-2, 518-28-5, 1565-94-2, 79-94-7, 2971-36-0, 68392-35-8, 72-43-5, 79-95-8, 33419-42-0	14	619	1103	1.53	1	1	0.1553
CTD_CHEMICALS_GOENRICH_CELLCOMP	GO:0070013|intracellular organelle lumen	12	15.79	0.0476	131-55-5, 67227-56-9, 143-74-8, 29767-20-2, 2971-36-0, 79-94-7, 1565-94-2, 518-28-5, 33419-42-0, 72-43-5, 79-95-8, 68392-35-8	14	619	1103	1.53	1	1	0.1553
TOXCAST_ACTIVE	BSK_hDFCGF_IL8_down	5	6.58	0.0476	1478-61-1, 2971-36-0, 68392-35-8, 27955-94-8, 79-94-7	18	142	1694	3.31	1	1	0.1553
TOXPRINT_STRUCTURE	bond:CX_halide_aromatic-X_halo_phenol_para	5	6.58	0.0477	13473-26-2, 16423-68-0, 15905-32-5, 129-16-8, 15086-94-9	67	170	8195	3.6	1	1	0.1553
CTD_CHEMICALS_DISEASES	Kidney Calculi	5	6.58	0.0498	80-05-7, 129-16-8, 29767-20-2, 569-57-3, 77-09-8	25	153	2583	3.38	1	1	0.1614
HTS_STRONGACTIVE	cytotoxicity:tox21-rt-viability-hepg2-p1_viability@flor_1	12	15.79	0.0498	115-39-9, 68047-06-3, 4221-68-5, 118-82-1, 15905-32-5, 68392-35-8, 518-47-8, 16423-68-0, 13473-26-2, 139233-53-7, 15086-94-9, 85-60-9	61	497	4870	1.93	1	1	0.1614
HTS_ACTIVE	cytotoxicity:tox21-rt-viability-hek293-p1_viability@flor_1	22	28.95	0.0498	15905-32-5, 517-28-2, 1571-75-1, 5613-46-7, 16423-68-0, 79-97-0, 4162-45-2, 1565-94-2, 6807-17-6, 61445-50-9, 85-60-9, 1943-97-1, 15086-94-9, 139233-53-7, 13473-26-2, 518-47-8, 68392-35-8, 843-55-0, 68047-06-3, 14868-03-2, 24038-68-4, 131-54-4	68	1380	6512	1.53	1	1	0.1614
TOXCAST_ACTIVE	APR_HepG2_CellLoss_24h_dn	7	9.21	0.05	72-43-5, 27955-94-8, 2971-36-0, 80-05-7, 77-40-7, 77-09-8, 79-94-7	18	283	1694	2.33	1	1	0.1617
HTS_ACTIVE	endoplasmic reticulum stress:tox21-esre-bla-p1_esre-agonist_1	4	5.26	0.0503	5613-46-7, 33419-42-0, 79-94-7, 115-39-9	68	81	6512	4.73	1	1	0.1624
CTD_CHEMICALS_GOENRICH_MOLFUNCT	GO:0001228|DNA-binding transcription activator activity, RNA polymerase II-specific	8	10.53	0.0511	518-28-5, 79-94-7, 2971-36-0, 80-05-7, 68392-35-8, 33419-42-0, 72-43-5, 79-95-8	14	292	1090	2.13	1	1	0.1646
CTD_CHEMICALS_DISEASES	Carcinoma, Ductal	5	6.58	0.0518	79-94-7, 143-74-8, 68392-35-8, 2624-43-3, 29767-20-2	25	155	2583	3.33	1	1	0.1666
TOXINS_TARGETS	CYP2C9	5	6.58	0.052	72-43-5, 80-05-7, 2971-36-0, 79-94-7, 77-09-8	14	140	1220	3.11	1	1	0.167
MESH	Lignans	2	2.63	0.0524	6559-91-7, 518-28-5	42	7	5355	36.43	1	1	0.168
TOXPRINT_STRUCTURE	bond:S(=O)O_sulfonate	6	7.89	0.054	143-74-8, 115-39-9, 71-67-0, 76-60-8, 34487-61-1, 125-31-5	67	255	8195	2.88	1	1	0.1728
CTD_CHEMICALS_GOENRICH_MOLFUNCT	GO:0000978|RNA polymerase II proximal promoter sequence-specific DNA binding	8	10.53	0.0542	2971-36-0, 80-05-7, 518-28-5, 79-94-7, 33419-42-0, 72-43-5, 79-95-8, 68392-35-8	14	300	1090	2.08	1	1	0.173
TOXCAST_ACTIVE	BSK_LPS_TissueFactor_down	5	6.58	0.0542	2971-36-0, 68392-35-8, 77-09-8, 79-94-7, 27955-94-8	18	148	1694	3.18	1	1	0.173
CTD_CHEMICALS_DISEASES	Vitamin A Deficiency	4	5.26	0.0543	79-95-8, 67227-56-9, 518-28-5, 79-94-7	25	94	2583	4.4	1	1	0.1731
CTD_CHEMICALS_DISEASES	Intellectual Disability	5	6.58	0.0549	80-05-7, 33419-42-0, 2624-43-3, 518-28-5, 68392-35-8	25	158	2583	3.27	1	1	0.1747
TOXCAST_ACTIVE	OT_FXR_FXRSRC1_1440	5	6.58	0.0553	1478-61-1, 79-95-8, 72-43-5, 80-05-7, 118-82-1	18	149	1694	3.16	1	1	0.1757
TOXCAST_ACTIVE	BSK_KF3CT_IP10_down	6	7.89	0.0558	27955-94-8, 68392-35-8, 77-40-7, 1478-61-1, 2971-36-0, 79-94-7	18	217	1694	2.6	1	1	0.1768
HTS_STRONGACTIVE	cytotoxicity:tox21-rt-viability-hek293-p1_viability@glo_0h_1	6	7.89	0.0559	15086-94-9, 76-60-8, 15905-32-5, 13473-26-2, 16423-68-0, 115-39-9	61	169	4870	2.83	1	1	0.177
CTD_CHEMICALS_PATHWAYS	REACT:R-HSA-983705|Signaling by the B Cell Receptor (BCR)	6	7.89	0.0571	33419-42-0, 72-43-5, 68392-35-8, 80-05-7, 79-94-7, 518-28-5	12	195	939	2.41	1	1	0.1805
TOXCAST_ACTIVE	NVS_ENZ_hBACE	4	5.26	0.0574	68392-35-8, 2971-36-0, 72-43-5, 77-40-7	18	90	1694	4.18	1	1	0.1812
CTD_CHEMICALS_GOENRICH_MOLFUNCT	GO:0008022|protein C-terminus binding	4	5.26	0.058	33419-42-0, 80-05-7, 518-28-5, 68392-35-8	14	77	1090	4.04	1	1	0.1823
HTS_STRONGACTIVE	sterol homeostasis:tox21-ror-cho-antagonist-p1_ror-antgonist_1	10	13.16	0.058	569-57-3, 2624-43-3, 27955-94-8, 33419-42-0, 517-28-2, 4162-45-2, 518-28-5, 1565-94-2, 61445-50-9, 77-40-7	61	397	4870	2.01	1	1	0.1823
HTS_STRONGACTIVE	thyroid homeostasis:tox21-tshr-agonist-p1_tshr-agonist_1	7	9.21	0.0581	79-97-0, 85-60-9, 24038-68-4, 4221-68-5, 13080-86-9, 5613-46-7, 68047-06-3	61	226	4870	2.47	1	1	0.1823
TOXCAST_ACTIVE	BSK_3C_HLADR_down	8	10.53	0.0587	79-94-7, 77-09-8, 77-40-7, 2971-36-0, 1478-61-1, 27955-94-8, 68392-35-8, 72-43-5	18	338	1694	2.23	1	1	0.1842
TOXCAST_ACTIVE	NVS_TR_hNET	5	6.58	0.0589	1478-61-1, 2971-36-0, 77-40-7, 80-05-7, 68392-35-8	18	152	1694	3.1	1	1	0.1842
CTD_CHEMICALS_DISEASES	Mesothelioma	9	11.84	0.0591	85-60-9, 143-74-8, 77-09-8, 131-55-5, 31477-60-8, 79-95-8, 1565-94-2, 30299-08-2, 2971-36-0	25	462	2583	2.01	1	1	0.1848
CTD_CHEMICALS_GOENRICH_MOLFUNCT	GO:0008395|steroid hydroxylase activity	3	3.95	0.0594	79-94-7, 68392-35-8, 72-43-5	14	34	1090	6.87	1	1	0.1852
HTS_ACTIVE	autofluorescence:tox21-spec-hek293-p1_autofluor@cell-blue-n_1	10	13.16	0.0595	131-55-5, 129-16-8, 13473-26-2, 15086-94-9, 61445-50-9, 15905-32-5, 31127-54-5, 517-28-2, 52479-85-3, 6559-91-7	68	476	6512	2.01	1	1	0.1852
TOXPRINT_STRUCTURE	chain:aromaticAlkene_Ph-C2_acyclic_generic	5	6.58	0.0595	68392-35-8, 14868-03-2, 569-57-3, 2624-43-3, 68047-06-3	67	183	8195	3.34	1	1	0.1852
CTD_CHEMICALS_PATHWAYS	KEGG:hsa05212|Pancreatic cancer	5	6.58	0.0598	68392-35-8, 518-28-5, 79-94-7, 33419-42-0, 72-43-5	12	135	939	2.9	1	1	0.1856
CTD_CHEMICALS_PATHWAYS	REACT:R-HSA-74160|Gene Expression	9	11.84	0.06	143-74-8, 29767-20-2, 2971-36-0, 518-28-5, 79-94-7, 79-95-8, 72-43-5, 33419-42-0, 68392-35-8	12	391	939	1.8	1	1	0.1859
CTD_CHEMICALS_GOENRICH_CELLCOMP	GO:0030017|sarcomere	3	3.95	0.0613	518-28-5, 33419-42-0, 80-05-7	14	35	1103	6.75	1	1	0.1897
MESH	Organic Chemicals	35	46.05	0.0617	1943-97-1, 10040-45-6, 13473-26-2, 2624-43-3, 52479-85-3, 6559-91-7, 118-82-1, 1565-94-2, 3236-71-3, 15905-32-5, 72-43-5, 79-94-7, 77-40-7, 115-39-9, 143-74-8, 27072-45-3, 33419-42-0, 569-57-3, 85-60-9, 518-47-8, 76-60-8, 1478-61-1, 30299-08-2, 117091-64-2, 80-05-7, 518-28-5, 620-92-8, 2971-36-0, 77-09-8, 131-55-5, 79-95-8, 603-50-9, 843-55-0, 1260-17-9, 68047-06-3	42	3705	5355	1.2	1	1	0.1899
HTS_ACTIVE	apoptosis:tox21-casp3-cho-p1_casp3-activator_1	7	9.21	0.0617	33419-42-0, 24038-68-4, 68392-35-8, 68047-06-3, 79-94-7, 4221-68-5, 139233-53-7	68	274	6512	2.45	1	1	0.1899
CTD_CHEMICALS_DISEASES	Hypopituitarism	4	5.26	0.0617	131-55-5, 72-43-5, 16423-68-0, 2971-36-0	25	99	2583	4.17	1	1	0.1899
TOXPRINT_STRUCTURE	bond:COC_ether_aliphatic	3	3.95	0.0617	33419-42-0, 117091-64-2, 29767-20-2	67	822	8195	0.45	1	1	0.1899
CTD_CHEMICALS_GOENRICH_CELLCOMP	GO:0033647|host intracellular organelle	5	6.58	0.0621	79-94-7, 68392-35-8, 79-95-8, 2971-36-0, 29767-20-2	14	134	1103	2.94	1	1	0.1907
CTD_CHEMICALS_GOENRICH_MOLFUNCT	GO:0000987|proximal promoter sequence-specific DNA binding	8	10.53	0.0622	33419-42-0, 72-43-5, 79-95-8, 68392-35-8, 80-05-7, 2971-36-0, 79-94-7, 518-28-5	14	315	1090	1.98	1	1	0.1908
TOXPRINT_STRUCTURE	bond:CN_amine_alicyclic_generic	3	3.95	0.0626	31477-60-8, 139233-53-7, 67227-56-9	67	838	8195	0.44	1	1	0.1912
TOXCAST_ACTIVE	ATG_RORE_CIS_up	6	7.89	0.0626	16423-68-0, 115-39-9, 80-05-7, 77-09-8, 79-94-7, 27955-94-8	18	224	1694	2.52	1	1	0.1912
TOXCAST_ACTIVE	BSK_LPS_MCP1_down	6	7.89	0.0626	72-43-5, 68392-35-8, 27955-94-8, 1478-61-1, 2971-36-0, 79-94-7	18	224	1694	2.52	1	1	0.1912
CTD_CHEMICALS_GENES	GPER1	2	2.63	0.063	68392-35-8, 80-05-7	22	7	2273	29.52	1	1	0.1917
CTD_CHEMICALS_GENES	IGF1R	2	2.63	0.063	72-43-5, 68392-35-8	22	7	2273	29.52	1	1	0.1917
TOXCAST_ACTIVE	ATG_DR5_CIS_up	6	7.89	0.0636	115-39-9, 16423-68-0, 80-05-7, 77-09-8, 79-94-7, 68392-35-8	18	225	1694	2.51	1	1	0.1934
CTD_CHEMICALS_DISEASES	Loeys-Dietz Syndrome	3	3.95	0.0643	79-94-7, 72-43-5, 2971-36-0	25	45	2583	6.89	1	1	0.1948
CTD_CHEMICALS_GOENRICH_CELLCOMP	GO:0000790|nuclear chromatin	8	10.53	0.0643	2971-36-0, 518-28-5, 79-94-7, 29767-20-2, 79-95-8, 72-43-5, 33419-42-0, 68392-35-8	14	322	1103	1.96	1	1	0.1948
TOXCAST_ACTIVE	BSK_hDFCGF_TIMP1_down	5	6.58	0.065	2971-36-0, 1478-61-1, 79-94-7, 27955-94-8, 68392-35-8	18	157	1694	3	1	1	0.1963
CTD_CHEMICALS_GOENRICH_CELLCOMP	GO:0098797|plasma membrane protein complex	5	6.58	0.065	72-43-5, 33419-42-0, 80-05-7, 79-94-7, 518-28-5	14	136	1103	2.9	1	1	0.1963
TOXINS_TARGETS	NR1I3	3	3.95	0.0651	80-05-7, 72-43-5, 2971-36-0	14	40	1220	6.54	1	1	0.1963
HTS_STRONGACTIVE	cytotoxicity:tox21-rt-viability-hek293-p1_viability@glo_24h_1	18	23.68	0.0653	131-54-4, 3236-71-3, 13080-86-9, 5613-46-7, 24038-68-4, 14868-03-2, 518-28-5, 4221-68-5, 68047-06-3, 620-92-8, 68392-35-8, 1943-97-1, 85-60-9, 1565-94-2, 79-97-0, 27955-94-8, 4162-45-2, 33419-42-0	61	910	4870	1.58	1	1	0.1967
TOXINS_TARGETS	CYP2C19	5	6.58	0.0659	79-94-7, 77-09-8, 72-43-5, 2971-36-0, 68047-06-3	14	151	1220	2.89	1	1	0.198
HTS_STRONGACTIVE	cytotoxicity:tox21-rt-viability-hepg2-p1_viability@flor_40h_1	9	11.84	0.066	68047-06-3, 115-39-9, 16423-68-0, 518-47-8, 15086-94-9, 4221-68-5, 85-60-9, 15905-32-5, 68392-35-8	61	337	4870	2.13	1	1	0.1981
CTD_CHEMICALS_GOENRICH_MOLFUNCT	GO:0003676|nucleic acid binding	8	10.53	0.0662	518-28-5, 79-94-7, 2971-36-0, 68392-35-8, 29767-20-2, 79-95-8, 72-43-5, 33419-42-0	14	321	1090	1.94	1	1	0.1981
CTD_CHEMICALS_DISEASES	Myocardial Ischemia	9	11.84	0.0662	143-74-8, 77-09-8, 569-57-3, 129-16-8, 67227-56-9, 16423-68-0, 29767-20-2, 1565-94-2, 79-95-8	25	476	2583	1.95	1	1	0.1981
CTD_CHEMICALS_GOENRICH_CELLCOMP	GO:0033648|host intracellular membrane-bounded organelle	5	6.58	0.0665	79-95-8, 2971-36-0, 29767-20-2, 79-94-7, 68392-35-8	14	137	1103	2.88	1	1	0.1987
CTD_CHEMICALS_DISEASES	Schizophrenia	2	2.63	0.0675	29767-20-2, 2971-36-0	25	511	2583	0.4	1	1	0.2015
CTD_CHEMICALS_DISEASES	Pulmonary Disease, Chronic Obstructive	2	2.63	0.0682	2971-36-0, 67227-56-9	25	484	2583	0.43	1	1	0.2031
MULTICASE_TOX_PREDICTION	MDR1 inhibition at 10uM	11	14.47	0.0686	25327-89-3, 85-60-9, 13473-26-2, 21850-44-2, 52479-85-3, 4162-45-2, 31127-54-5, 72-43-5, 843-55-0, 30299-08-2, 2971-36-0	67	662	7882	1.95	1	1	0.2039
CTD_CHEMICALS_GOENRICH_MOLFUNCT	GO:0003700|DNA-binding transcription factor activity	8	10.53	0.0691	68392-35-8, 33419-42-0, 72-43-5, 79-95-8, 29767-20-2, 79-94-7, 518-28-5, 2971-36-0	14	325	1090	1.92	1	1	0.2052
MULTICASE_TOX_PREDICTION	RCA human acute liver damage	12	15.79	0.0694	41351-30-8, 29767-20-2, 117091-64-2, 16423-68-0, 52479-85-3, 61445-50-9, 30299-08-2, 68392-35-8, 68047-06-3, 81-90-3, 33419-42-0, 22345-47-7	67	2138	7882	0.66	1	1	0.2058
TOXCAST_ACTIVE	ATG_Oct_MLP_CIS_up	8	10.53	0.0696	79-94-7, 1478-61-1, 77-40-7, 68392-35-8, 27955-94-8, 77-09-8, 16423-68-0, 80-05-7	18	366	1694	2.06	1	1	0.206
CTD_GOSLIM_BIOPROCESS	GO:0007010|cytoskeleton organization	8	10.53	0.07	68392-35-8, 33419-42-0, 72-43-5, 518-28-5, 79-94-7, 2971-36-0, 143-74-8, 80-05-7	16	375	1491	1.99	1	1	0.207
HTS_ACTIVE	autofluorescence:tox21-spec-hepg2-p1_autofluor@blue_2	11	14.47	0.0701	15905-32-5, 31127-54-5, 52479-85-3, 6559-91-7, 61445-50-9, 518-28-5, 518-47-8, 13473-26-2, 129-16-8, 131-55-5, 15086-94-9	68	544	6512	1.94	1	1	0.207
CTD_CHEMICALS_DISEASES	Adrenocortical Carcinoma	5	6.58	0.0709	143-74-8, 79-94-7, 2971-36-0, 16423-68-0, 72-43-5	25	172	2583	3	1	1	0.2087
CTD_CHEMICALS_GOENRICH_CELLCOMP	GO:0030016|myofibril	3	3.95	0.071	518-28-5, 33419-42-0, 80-05-7	14	38	1103	6.22	1	1	0.2087
TOXCAST_ACTIVE	APR_HepG2_OxidativeStress_72h_up	6	7.89	0.071	72-43-5, 27955-94-8, 80-05-7, 77-40-7, 79-94-7, 77-09-8	18	232	1694	2.43	1	1	0.2087
CTD_CHEMICALS_DISEASES	Wilms Tumor	4	5.26	0.0711	79-94-7, 79-95-8, 80-05-7, 2971-36-0	25	105	2583	3.94	1	1	0.2087
HTS_STRONGACTIVE	cytotoxicity:tox21-rt-viability-hepg2-p1_viability@flor_24h_1	9	11.84	0.0717	13473-26-2, 518-47-8, 16423-68-0, 15086-94-9, 115-39-9, 118-82-1, 4221-68-5, 15905-32-5, 68392-35-8	61	346	4870	2.08	1	1	0.2091
CTD_CHEMICALS_GENES	ERBB2	2	2.63	0.0717	33419-42-0, 68392-35-8	22	8	2273	25.83	1	1	0.2091
CTD_CHEMICALS_GENES	TRH	2	2.63	0.0717	16423-68-0, 131-55-5	22	8	2273	25.83	1	1	0.2091
TOXCAST_ACTIVE	Tox21_AR_BLA_Antagonist_ratio	8	10.53	0.0717	27955-94-8, 68392-35-8, 72-43-5, 77-40-7, 1478-61-1, 2971-36-0, 77-09-8, 80-05-7	18	370	1694	2.03	1	1	0.2091
CTD_CHEMICALS_DISEASES	Ataxia	3	3.95	0.072	143-74-8, 518-28-5, 2624-43-3	25	48	2583	6.46	1	1	0.2098
MESH	Polycyclic Compounds	9	11.84	0.0722	117091-64-2, 518-47-8, 13473-26-2, 3236-71-3, 15905-32-5, 33419-42-0, 6559-91-7, 1260-17-9, 518-28-5	42	567	5355	2.02	1	1	0.2098
MESH	Glycosides	3	3.95	0.0723	33419-42-0, 117091-64-2, 29767-20-2	42	58	5355	6.59	1	1	0.2098
MULTICASE_TOX_PREDICTION	RCA fetal weight decrease, rat	9	11.84	0.0725	31477-60-8, 38103-06-9, 41351-30-8, 126-00-1, 68047-06-3, 6807-17-6, 77-40-7, 72-43-5, 68392-35-8	67	508	7882	2.08	1	1	0.2103
HTS_ACTIVE	autofluorescence:tox21-spec-hepg2-p1_autofluor@med-blue-n_1	9	11.84	0.0733	61445-50-9, 15905-32-5, 6559-91-7, 52479-85-3, 13473-26-2, 518-47-8, 129-16-8, 131-55-5, 15086-94-9	68	415	6512	2.08	1	1	0.2122
CTD_CHEMICALS_GOENRICH_MOLFUNCT	GO:0019207|kinase regulator activity	4	5.26	0.074	33419-42-0, 80-05-7, 68392-35-8, 518-28-5	14	85	1090	3.66	1	1	0.2138
MESH	Butylated Hydroxytoluene	2	2.63	0.074	85-60-9, 118-82-1	42	10	5355	25.5	1	1	0.2138
CTD_CHEMICALS_PATHWAYS	KEGG:hsa04380|Osteoclast differentiation	6	7.89	0.0743	33419-42-0, 72-43-5, 68392-35-8, 2971-36-0, 79-94-7, 518-28-5	12	209	939	2.25	1	1	0.2138
TOXCAST_ACTIVE	NVS_IC_rNaCh_site2	4	5.26	0.0743	80-05-7, 77-40-7, 1478-61-1, 68392-35-8	18	100	1694	3.76	1	1	0.2138
HTS_ACTIVE	genotoxic stress:tox21-h2ax-cho-p2_gh2ax-inducer_1	11	14.47	0.0744	24038-68-4, 1943-97-1, 3236-71-3, 68392-35-8, 27955-94-8, 4162-45-2, 33419-42-0, 79-94-7, 68047-06-3, 1478-61-1, 620-92-8	68	556	6512	1.89	1	1	0.214
CTD_CHEMICALS_DISEASES	Thyroid Hormone Resistance, Selective Pituitary	3	3.95	0.0747	29767-20-2, 79-95-8, 131-55-5	25	49	2583	6.33	1	1	0.2143
CTD_CHEMICALS_GOENRICH_MOLFUNCT	GO:0000981|DNA-binding transcription factor activity, RNA polymerase II-specific	8	10.53	0.0755	68392-35-8, 29767-20-2, 33419-42-0, 72-43-5, 79-95-8, 518-28-5, 79-94-7, 2971-36-0	14	333	1090	1.87	1	1	0.2163
CTD_CHEMICALS_GOENRICH_CELLCOMP	GO:0000785|chromatin	8	10.53	0.0756	2971-36-0, 79-94-7, 518-28-5, 33419-42-0, 79-95-8, 72-43-5, 29767-20-2, 68392-35-8	14	337	1103	1.87	1	1	0.2163
HTS_STRONGACTIVE	cytotoxicity:tox21-rt-viability-hepg2-p1_viability@flor_32h_1	9	11.84	0.0766	85-60-9, 16423-68-0, 518-47-8, 13473-26-2, 15086-94-9, 15905-32-5, 68392-35-8, 115-39-9, 4221-68-5	61	353	4870	2.04	1	1	0.2189
TOXCAST_ACTIVE	BSK_hDFCGF_MMP1_down	5	6.58	0.0769	27955-94-8, 79-94-7, 68392-35-8, 1478-61-1, 2971-36-0	18	166	1694	2.83	1	1	0.2194
MESH	Carboxylic Acids	3	3.95	0.0775	10040-45-6, 1565-94-2, 30299-08-2	42	802	5355	0.48	1	1	0.2209
PHARMACTIONLIST	Antineoplastic Agents	6	7.89	0.0782	68047-06-3, 569-57-3, 518-28-5, 29767-20-2, 117091-64-2, 68392-35-8	27	245	2720	2.47	1	1	0.2225
CTD_CHEMICALS_GOENRICH_CELLCOMP	GO:0043228|non-membrane-bounded organelle	9	11.84	0.0786	518-28-5, 79-94-7, 2971-36-0, 68392-35-8, 72-43-5, 79-95-8, 33419-42-0, 143-74-8, 29767-20-2	14	399	1103	1.78	1	1	0.2231
CTD_CHEMICALS_GOENRICH_CELLCOMP	GO:0043232|intracellular non-membrane-bounded organelle	9	11.84	0.0786	2971-36-0, 79-94-7, 518-28-5, 72-43-5, 79-95-8, 33419-42-0, 68392-35-8, 143-74-8, 29767-20-2	14	399	1103	1.78	1	1	0.2231
TOXCAST_ACTIVE	NVS_ADME_hCYP2B6	4	5.26	0.0797	131-55-5, 77-40-7, 80-05-7, 1478-61-1	18	103	1694	3.65	1	1	0.2254
TOXCAST_ACTIVE	Tox21_p53_BLA_p5_viability	4	5.26	0.0797	79-94-7, 68392-35-8, 1478-61-1, 2971-36-0	18	103	1694	3.65	1	1	0.2254
HTS_ACTIVE	genotoxic stress:tox21-ms-p53-p1_p53-agonist_1	6	7.89	0.0798	79-94-7, 1571-75-1, 115-33-3, 14008-48-1, 33419-42-0, 125-13-3	68	224	6512	2.57	1	1	0.2254
HTS_STRONGACTIVE	cytotoxicity:tox21-rt-viability-hek293-p1_viability@flor_24h_1	8	10.53	0.08	15086-94-9, 61445-50-9, 6807-17-6, 518-47-8, 16423-68-0, 68047-06-3, 13473-26-2, 15905-32-5	61	274	4870	2.33	1	1	0.2258
CTD_CHEMICALS_GENES	TOP2A	2	2.63	0.0803	29767-20-2, 33419-42-0	22	9	2273	22.96	1	1	0.2262
CTD_CHEMICALS_DISEASES	3-Hydroxy-3-Methylglutaryl-CoA Synthase 2 Deficiency	2	2.63	0.0807	67227-56-9, 79-95-8	25	9	2583	22.96	1	1	0.227
TOXCAST_ACTIVE	BSK_KF3CT_MCP1_down	5	6.58	0.0811	1478-61-1, 2971-36-0, 27955-94-8, 79-94-7, 68392-35-8	18	169	1694	2.78	1	1	0.2277
CTD_CHEMICALS_GOENRICH_MOLFUNCT	GO:0033218|amide binding	6	7.89	0.0813	72-43-5, 33419-42-0, 68392-35-8, 80-05-7, 79-94-7, 518-28-5	14	207	1090	2.26	1	1	0.2282
MESH	Sulfur Compounds	2	2.63	0.0816	76-60-8, 115-39-9	42	616	5355	0.41	1	1	0.2285
CTD_CHEMICALS_DISEASES	Carcinoma, Hepatocellular	13	17.11	0.0819	79-95-8, 30299-08-2, 85-60-9, 143-74-8, 2624-43-3, 129-16-8, 131-55-5, 67227-56-9, 68392-35-8, 72-43-5, 518-28-5, 79-94-7, 569-57-3	25	848	2583	1.58	1	1	0.2291
CTD_CHEMICALS_PATHWAYS	REACT:R-HSA-383280|Nuclear Receptor transcription pathway	3	3.95	0.0832	2971-36-0, 79-95-8, 79-94-7	12	42	939	5.59	1	1	0.2323
MULTICASE_TOX_PREDICTION	MRP4 inhibition at 10uM	8	10.53	0.0838	27072-45-3, 31477-60-8, 38103-06-9, 68392-35-8, 68047-06-3, 126-00-1, 13473-26-2, 41351-30-8	67	1513	7882	0.62	1	1	0.2338
HTS_ACTIVE	retinoid homeostasis:tox21-rar-antagonist-p2_rar-antagonist_1	14	18.42	0.0839	72-43-5, 14008-48-1, 115-33-3, 843-55-0, 77-40-7, 14868-03-2, 1571-75-1, 5613-46-7, 27955-94-8, 79-97-0, 33419-42-0, 125-13-3, 4162-45-2, 61445-50-9	68	776	6512	1.73	1	1	0.2338
CTD_CHEMICALS_GOENRICH_CELLCOMP	GO:0044449|contractile fiber part	3	3.95	0.0847	80-05-7, 518-28-5, 33419-42-0	14	42	1103	5.63	1	1	0.2355
HTS_STRONGACTIVE	cytotoxicity:tox21-rt-viability-hepg2-p1_viability@glo_0h_1	6	7.89	0.0848	15086-94-9, 115-39-9, 16423-68-0, 76-60-8, 27955-94-8, 15905-32-5	61	191	4870	2.51	1	1	0.2356
PHARMACTIONLIST	Gastrointestinal Agents	4	5.26	0.0853	115-33-3, 603-50-9, 10040-45-6, 125-13-3	27	110	2720	3.66	1	1	0.2365
CTD_CHEMICALS_DISEASES	Hyperbilirubinemia, Neonatal	3	3.95	0.0856	33419-42-0, 72-43-5, 68392-35-8	25	53	2583	5.85	1	1	0.2369
TOXINS_TARGETS	NR1I2	7	9.21	0.0856	79-95-8, 72-43-5, 16423-68-0, 2971-36-0, 68047-06-3, 77-09-8, 79-94-7	14	274	1220	2.23	1	1	0.2369
CTD_CHEMICALS_GOENRICH_MOLFUNCT	GO:0003682|chromatin binding	7	9.21	0.0863	72-43-5, 33419-42-0, 68392-35-8, 80-05-7, 2971-36-0, 79-94-7, 518-28-5	14	247	1090	2.21	1	1	0.2382
CTD_CHEMICALS_DISEASES	Salivary Gland Neoplasms	4	5.26	0.0864	29767-20-2, 67227-56-9, 33419-42-0, 68392-35-8	25	114	2583	3.63	1	1	0.2382
HTS_ACTIVE	oxidative stress:tox21-are-bla-p1_nrf2-agonist_1	16	21.05	0.0865	79-94-7, 843-55-0, 2971-36-0, 620-92-8, 77-40-7, 5613-46-7, 80-05-7, 14868-03-2, 6807-17-6, 79-97-0, 76-60-8, 27955-94-8, 79-95-8, 33419-42-0, 1943-97-1, 2624-43-3	68	972	6512	1.58	1	1	0.2382
LEADSCOPE_TOXICITY	Human Adverse Cardiological Effects: coronary artery	3	3.95	0.0869	139233-53-7, 67227-56-9, 1565-94-2	66	677	7259	0.49	1	1	0.2391
TOXCAST_ACTIVE	BSK_BE3C_MMP1_up	4	5.26	0.0873	77-09-8, 1478-61-1, 72-43-5, 77-40-7	18	107	1694	3.52	1	1	0.2397
LEADSCOPE_TOXICITY	Developmental Toxicity: post impl. loss mouse	2	2.63	0.0879	34487-61-1, 143-74-8	66	513	7259	0.43	1	1	0.2412
TOXPRINT_STRUCTURE	bond:C(=O)N_carboxamide_(NHR)	3	3.95	0.0888	115-33-3, 14008-48-1, 125-13-3	67	787	8195	0.47	1	1	0.2432
TOXCAST_ACTIVE	BSK_3C_Thrombomodulin_up	4	5.26	0.0892	79-94-7, 68392-35-8, 2971-36-0, 1478-61-1	18	108	1694	3.49	1	1	0.2432
TOXCAST_ACTIVE	BSK_BE3C_MMP1_down	4	5.26	0.0892	68392-35-8, 79-94-7, 1478-61-1, 2971-36-0	18	108	1694	3.49	1	1	0.2432
CTD_CHEMICALS_DISEASES	SPERMATOGENIC FAILURE 8	2	2.63	0.0893	2971-36-0, 79-95-8	25	10	2583	20.66	1	1	0.2432
CTD_CHEMICALS_DISEASES	Stupor	2	2.63	0.0893	131-55-5, 16423-68-0	25	10	2583	20.66	1	1	0.2432
CTD_CHEMICALS_DISEASES	Amyotrophic Lateral Sclerosis	6	7.89	0.0894	72-43-5, 129-16-8, 16423-68-0, 79-94-7, 77-09-8, 569-57-3	25	263	2583	2.36	1	1	0.2432
TOXPRINT_STRUCTURE	bond:CN_amine_sec-NH_generic	2	2.63	0.0904	67227-56-9, 139233-53-7	67	599	8195	0.41	1	1	0.2455
CTD_CHEMICALS_GOENRICH_CELLCOMP	GO:0030018|Z disc	2	2.63	0.0908	518-28-5, 33419-42-0	14	8	1103	19.7	1	1	0.2462
CTD_CHEMICALS_DISEASES	Disorder of Sex Development, 46,XY	3	3.95	0.0912	72-43-5, 79-95-8, 131-55-5	25	55	2583	5.64	1	1	0.247
TOXCAST_ACTIVE	ACEA_T47D_80hr_Negative	9	11.84	0.0915	77-09-8, 80-05-7, 79-94-7, 1478-61-1, 2971-36-0, 77-40-7, 68392-35-8, 27955-94-8, 79-95-8	18	448	1694	1.89	1	1	0.247
HTS_STRONGACTIVE	counter screen (cell viability):tox21-p53-bla-p1_viability_1	8	10.53	0.0917	27955-94-8, 85-60-9, 125-13-3, 115-33-3, 603-50-9, 115-39-9, 68047-06-3, 3236-71-3	61	295	4870	2.17	1	1	0.247
PHARMACTIONLIST	Selective Estrogen Receptor Modulators	2	2.63	0.0917	68047-06-3, 68392-35-8	27	10	2720	20.15	1	1	0.247
CTD_CHEMICALS_GENES	PPARG	4	5.26	0.0918	79-95-8, 80-05-7, 30299-08-2, 79-94-7	22	118	2273	3.5	1	1	0.247
CTD_CHEMICALS_GOENRICH_MOLFUNCT	GO:0097718|disordered domain specific binding	2	2.63	0.0918	33419-42-0, 518-28-5	14	8	1090	19.46	1	1	0.247
TOXINS_TARGETS	TOP2A	2	2.63	0.0922	29767-20-2, 33419-42-0	14	9	1220	19.37	1	1	0.2477
CTD_CHEMICALS_DISEASES	Amenorrhea	4	5.26	0.0936	72-43-5, 2971-36-0, 16423-68-0, 77-09-8	25	118	2583	3.5	1	1	0.2512
CTD_CHEMICALS_GOENRICH_CELLCOMP	GO:0044444|cytoplasmic part	8	10.53	0.0941	79-95-8, 1565-94-2, 143-74-8, 67227-56-9, 68392-35-8, 72-43-5, 2971-36-0, 16423-68-0	14	838	1103	0.75	1	1	0.2522
CTD_GOSLIM_BIOPROCESS	GO:0034330|cell junction organization	7	9.21	0.0946	33419-42-0, 72-43-5, 68392-35-8, 80-05-7, 518-28-5, 79-94-7, 143-74-8	16	298	1491	2.19	1	1	0.2531
TOXCAST_ACTIVE	Tox21_ERa_BLA_Agonist_ratio	4	5.26	0.0951	1478-61-1, 79-95-8, 131-55-5, 80-05-7	18	111	1694	3.39	1	1	0.2542
TOXREFDB	non-neoplastic_SUB_rat_F_adult_in life observation_food consumption	2	2.63	0.0962	77-09-8, 80-05-7	5	22	883	16.05	1	1	0.2566
INDICATION	Acute Lymphocytic Leukemia (ALL)	2	2.63	0.0964	33419-42-0, 29767-20-2	13	11	1313	18.36	1	1	0.2569
TOXCAST_ACTIVE	ATG_Xbp1_CIS_up	7	9.21	0.0966	27955-94-8, 68392-35-8, 77-40-7, 80-05-7, 1478-61-1, 79-94-7, 77-09-8	18	292	1694	2.26	1	1	0.257
TOXCAST_ACTIVE	NVS_GPCR_gLTB4	3	3.95	0.0968	77-40-7, 80-05-7, 1478-61-1	18	53	1694	5.33	1	1	0.2574
ADVERSE_EFFECT	GIS_Abdominal Cramps	2	2.63	0.0972	603-50-9, 125-13-3	6	19	941	16.51	1	1	0.2578
CTD_CHEMICALS_GENES	ESRRG	2	2.63	0.0973	68392-35-8, 80-05-7	22	11	2273	18.79	1	1	0.2578
CTD_CHEMICALS_DISEASES	Sensation Disorders	2	2.63	0.0978	518-28-5, 80-05-7	25	11	2583	18.79	1	1	0.2588
CTD_CHEMICALS_PATHWAYS	REACT:R-HSA-2172127|DAP12 interactions	7	9.21	0.0984	68392-35-8, 72-43-5, 33419-42-0, 79-94-7, 518-28-5, 80-05-7, 2971-36-0	12	284	939	1.93	1	1	0.26
HTS_STRONGACTIVE	skin sensitization:tox21-ks-are-p1_nrf2-agonist_1	10	13.16	0.0993	603-50-9, 3236-71-3, 79-94-7, 115-33-3, 518-28-5, 1565-94-2, 6807-17-6, 72-43-5, 79-95-8, 125-13-3	61	421	4870	1.9	1	1	0.2618
TOXINS_TARGETS	ESR2	5	6.58	0.0993	72-43-5, 79-95-8, 68047-06-3, 2971-36-0, 80-05-7	14	173	1220	2.52	1	1	0.2618
CTD_CHEMICALS_DISEASES	Osteoarthritis, Hip	3	3.95	0.0998	518-28-5, 72-43-5, 79-94-7	25	58	2583	5.34	1	1	0.2628
DRUGBANK_TARGETS	ESR1	3	3.95	0.0999	68392-35-8, 569-57-3, 77-09-8	12	62	1249	5.04	1	1	0.2628
HTS_STRONGACTIVE	cytotoxicity:tox21-rt-viability-hepg2-p1_viability@glo_1	12	15.79	0.1001	15086-94-9, 16423-68-0, 518-47-8, 85-60-9, 4221-68-5, 1565-94-2, 6807-17-6, 115-39-9, 27955-94-8, 68392-35-8, 76-60-8, 15905-32-5	61	556	4870	1.72	1	1	0.2629
PHARMACTIONLIST	Estrogen Receptor Modulators	2	2.63	0.1004	68392-35-8, 68047-06-3	27	11	2720	18.32	1	1	0.2634
CTD_CHEMICALS_PATHWAYS	KEGG:hsa05224|Breast cancer	5	6.58	0.1008	518-28-5, 68392-35-8, 79-94-7, 2971-36-0, 33419-42-0	12	160	939	2.45	1	1	0.2638
HTS_STRONGACTIVE	cytotoxicity:tox21-rt-viability-hek293-p1_viability@flor_1	10	13.16	0.1009	68047-06-3, 6807-17-6, 61445-50-9, 15905-32-5, 68392-35-8, 518-47-8, 16423-68-0, 13473-26-2, 15086-94-9, 85-60-9	61	424	4870	1.88	1	1	0.2638
CTD_CHEMICALS_PATHWAYS	REACT:R-HSA-177929|Signaling by EGFR	7	9.21	0.1021	518-28-5, 79-94-7, 2971-36-0, 80-05-7, 68392-35-8, 72-43-5, 33419-42-0	12	288	939	1.9	1	1	0.2664
CTD_CHEMICALS_PATHWAYS	REACT:R-HSA-2424491|DAP12 signaling	7	9.21	0.1021	79-94-7, 518-28-5, 80-05-7, 2971-36-0, 68392-35-8, 72-43-5, 33419-42-0	12	288	939	1.9	1	1	0.2664
CTD_CHEMICALS_GOENRICH_MOLFUNCT	GO:0072341|modified amino acid binding	2	2.63	0.1027	33419-42-0, 518-28-5	14	9	1090	17.3	1	1	0.2668
CTD_CHEMICALS_PATHWAYS	KEGG:hsa04919|Thyroid hormone signaling pathway	4	5.26	0.1027	518-28-5, 72-43-5, 33419-42-0, 2971-36-0	12	100	939	3.13	1	1	0.2668
CTD_CHEMICALS_DISEASES	Thyroid Hormone Resistance Syndrome	3	3.95	0.1028	29767-20-2, 131-55-5, 79-95-8	25	59	2583	5.25	1	1	0.2668
CTD_CHEMICALS_GOENRICH_CELLCOMP	GO:0043292|contractile fiber	3	3.95	0.1028	33419-42-0, 80-05-7, 518-28-5	14	47	1103	5.03	1	1	0.2668
TOXCAST_ACTIVE	Tox21_p53_BLA_p4_viability	5	6.58	0.1038	79-95-8, 68392-35-8, 2971-36-0, 1478-61-1, 79-94-7	18	184	1694	2.56	1	1	0.2691
CTD_CHEMICALS_GOENRICH_CELLCOMP	GO:0005737|cytoplasm	8	10.53	0.105	2971-36-0, 68392-35-8, 72-43-5, 16423-68-0, 1565-94-2, 79-95-8, 143-74-8, 67227-56-9	14	824	1103	0.76	1	1	0.2718
HTS_ACTIVE	hypoxia stress:tox21-hre-bla-agonist-p1_hre-agonist_1	3	3.95	0.1062	843-55-0, 27955-94-8, 1571-75-1	68	54	6512	5.32	1	1	0.2744
CTD_GOSLIM_BIOPROCESS	GO:0009790|embryo development	10	13.16	0.1071	80-05-7, 143-74-8, 79-95-8, 72-43-5, 33419-42-0, 68392-35-8, 2971-36-0, 518-28-5, 1565-94-2, 79-94-7	16	568	1491	1.64	1	1	0.2765
TOXCAST_ACTIVE	ATG_Sox_CIS_up	4	5.26	0.1075	79-95-8, 79-94-7, 77-09-8, 68392-35-8	18	117	1694	3.22	1	1	0.2771
CTD_CHEMICALS_GOENRICH_MOLFUNCT	GO:0019902|phosphatase binding	5	6.58	0.1077	72-43-5, 33419-42-0, 80-05-7, 68392-35-8, 518-28-5	14	159	1090	2.45	1	1	0.2773
CTD_CHEMICALS_DISEASES	Autism Spectrum Disorder	4	5.26	0.1088	79-95-8, 33419-42-0, 129-16-8, 143-74-8	25	126	2583	3.28	1	1	0.2798
CTD_CHEMICALS_DISEASES	Leukemia, Myelogenous, Chronic, BCR-ABL Positive	4	5.26	0.1108	129-16-8, 29767-20-2, 79-94-7, 569-57-3	25	127	2583	3.25	1	1	0.2845
MULTICASE_TOX_PREDICTION	BCRP inhibition at 10uM	18	23.68	0.1111	131-55-5, 1470-79-7, 22345-47-7, 38103-06-9, 569-57-3, 131-54-4, 14868-03-2, 68047-06-3, 68392-35-8, 2624-43-3, 10040-45-6, 61445-50-9, 125-13-3, 31127-54-5, 41351-30-8, 611-99-4, 115-33-3, 14008-48-1	67	1436	7882	1.47	1	1	0.2849
LEADSCOPE_TOXICITY	Developmental Toxicity: retardation mouse	4	5.26	0.1114	143-74-8, 30299-08-2, 34487-61-1, 517-28-2	66	806	7259	0.55	1	1	0.2852
CTD_CHEMICALS_GOENRICH_CELLCOMP	GO:0031674|I band	2	2.63	0.1122	518-28-5, 33419-42-0	14	10	1103	15.76	1	1	0.2867
CTD_CHEMICALS_GOENRICH_CELLCOMP	GO:0035770|ribonucleoprotein granule	2	2.63	0.1122	80-05-7, 68392-35-8	14	10	1103	15.76	1	1	0.2867
HTS_ACTIVE	autofluorescence:tox21-spec-hepg2-p1_autofluor@blue_1	10	13.16	0.1128	131-55-5, 129-16-8, 13473-26-2, 518-47-8, 15086-94-9, 61445-50-9, 31127-54-5, 15905-32-5, 52479-85-3, 6559-91-7	68	527	6512	1.82	1	1	0.2877
CTD_CHEMICALS_GENES	LIF	2	2.63	0.114	72-43-5, 80-05-7	22	13	2273	15.9	1	1	0.29
CTD_CHEMICALS_PATHWAYS	REACT:R-HSA-186763|Downstream signal transduction	7	9.21	0.114	518-28-5, 79-94-7, 2971-36-0, 80-05-7, 68392-35-8, 33419-42-0, 72-43-5	12	299	939	1.83	1	1	0.29
CTD_CHEMICALS_DISEASES	Branchio-Oto-Renal Syndrome	2	2.63	0.1145	79-95-8, 79-94-7	25	13	2583	15.9	1	1	0.2907
CTD_CHEMICALS_DISEASES	HYPOTHYROIDISM, CONGENITAL, NONGOITROUS, 4	2	2.63	0.1145	16423-68-0, 131-55-5	25	13	2583	15.9	1	1	0.2907
CTD_CHEMICALS_GOENRICH_CELLCOMP	GO:0005856|cytoskeleton	7	9.21	0.1149	33419-42-0, 72-43-5, 68392-35-8, 2971-36-0, 518-28-5, 79-94-7, 143-74-8	14	289	1103	1.91	1	1	0.2912
MESH	Stilbenes	2	2.63	0.1159	68047-06-3, 569-57-3	42	16	5355	15.94	1	1	0.2928
TOXCAST_ACTIVE	Tox21_GR_BLA_Agonist_ratio	4	5.26	0.1161	2971-36-0, 1478-61-1, 68392-35-8, 79-94-7	18	121	1694	3.11	1	1	0.2928
LEADSCOPE_TOXICITY	Developmental Toxicity: structural rat	6	7.89	0.1161	143-74-8, 76-60-8, 125-31-5, 125-13-3, 34487-61-1, 115-39-9	66	1106	7259	0.6	1	1	0.2928
TOXCAST_ACTIVE	NVS_GPCR_rOpiate_NonSelective	3	3.95	0.1161	77-09-8, 77-40-7, 80-05-7	18	59	1694	4.79	1	1	0.2928
CTD_CHEMICALS_DISEASES	Feminization	4	5.26	0.1168	77-09-8, 1565-94-2, 85-60-9, 131-55-5	25	130	2583	3.18	1	1	0.2942
CTD_CHEMICALS_GENES	CYP3A4	5	6.58	0.1172	72-43-5, 33419-42-0, 29767-20-2, 68392-35-8, 16423-68-0	22	207	2273	2.5	1	1	0.2947
TOXPRINT_STRUCTURE	bond:C=O_carbonyl_ab-unsaturated_generic	8	10.53	0.1173	131-55-5, 131-54-4, 1470-79-7, 41351-30-8, 611-99-4, 61445-50-9, 31127-54-5, 52479-85-3	67	494	8195	1.98	1	1	0.2947
CTD_CHEMICALS_GOENRICH_MOLFUNCT	GO:0050839|cell adhesion molecule binding	5	6.58	0.1178	33419-42-0, 80-05-7, 79-94-7, 518-28-5, 68392-35-8	14	164	1090	2.37	1	1	0.2955
CTD_CHEMICALS_DISEASES	Mammary Neoplasms, Experimental	9	11.84	0.1189	1565-94-2, 30299-08-2, 29767-20-2, 85-60-9, 77-09-8, 143-74-8, 131-55-5, 67227-56-9, 31477-60-8	25	513	2583	1.81	1	1	0.2979
TOXPRINT_STRUCTURE	chain:aromaticAlkene_Ph-C2	4	5.26	0.1199	68047-06-3, 14868-03-2, 569-57-3, 68392-35-8	67	150	8195	3.26	1	1	0.3001
TOXCAST_ACTIVE	BSK_3C_MIG_down	4	5.26	0.1205	68392-35-8, 79-94-7, 1478-61-1, 2971-36-0	18	123	1694	3.06	1	1	0.3007
TOXCAST_ACTIVE	BSK_BE3C_uPAR_down	4	5.26	0.1205	27955-94-8, 79-94-7, 68392-35-8, 2971-36-0	18	123	1694	3.06	1	1	0.3007
CTD_CHEMICALS_DISEASES	Disease Progression	9	11.84	0.1209	79-95-8, 68392-35-8, 2971-36-0, 1565-94-2, 85-60-9, 80-05-7, 129-16-8, 569-57-3, 77-09-8	25	517	2583	1.8	1	1	0.3013
MULTICASE_TOX_PREDICTION	Local lymph node assay, mouse, moderate sensitizers (EC3 < 10%)	31	40.79	0.1217	41351-30-8, 85-60-9, 518-47-8, 76-60-8, 31127-54-5, 131-54-4, 603-50-9, 38103-06-9, 71-67-0, 1260-17-9, 68047-06-3, 1470-79-7, 77-09-8, 131-55-5, 125-31-5, 34487-61-1, 15905-32-5, 517-28-2, 115-39-9, 15086-94-9, 10040-45-6, 13473-26-2, 52479-85-3, 1565-94-2, 61445-50-9, 14868-03-2, 569-57-3, 68392-35-8, 143-74-8, 27072-45-3, 22345-47-7	67	2832	7882	1.29	1	1	0.303
CTD_CHEMICALS_GENES	TSHB	2	2.63	0.1222	16423-68-0, 131-55-5	22	14	2273	14.76	1	1	0.3038
TOXINS_TARGETS	ESR1	7	9.21	0.1225	77-09-8, 79-94-7, 68047-06-3, 2971-36-0, 80-05-7, 72-43-5, 79-95-8	14	327	1220	1.87	1	1	0.3038
LEADSCOPE_TOXICITY	Human Adverse Hepatobiliary Effects: jaundice	3	3.95	0.1225	41351-30-8, 30299-08-2, 1260-17-9	66	643	7259	0.51	1	1	0.3038
CTD_CHEMICALS_DISEASES	Periapical Periodontitis	2	2.63	0.1228	67227-56-9, 29767-20-2	25	14	2583	14.76	1	1	0.3038
CTD_CHEMICALS_DISEASES	THYROTROPIN-RELEASING HORMONE DEFICIENCY	2	2.63	0.1228	16423-68-0, 131-55-5	25	14	2583	14.76	1	1	0.3038
LEADSCOPE_TOXICITY	Human Adverse Cardiological Effects: electrocardiogram	3	3.95	0.1232	1565-94-2, 4162-45-2, 72-43-5	66	652	7259	0.51	1	1	0.3043
TOXCAST_ACTIVE	NVS_GPCR_rOXT	2	2.63	0.1233	80-05-7, 1478-61-1	18	13	1694	14.48	1	1	0.3043
TOXCAST_ACTIVE	BSK_hDFCGF_MIG_down	5	6.58	0.1241	27955-94-8, 68392-35-8, 1478-61-1, 2971-36-0, 79-94-7	18	196	1694	2.4	1	1	0.3059
CTD_CHEMICALS_GOENRICH_MOLFUNCT	GO:0019887|protein kinase regulator activity	3	3.95	0.1245	33419-42-0, 68392-35-8, 518-28-5	14	52	1090	4.49	1	1	0.3065
CTD_CHEMICALS_GOENRICH_CELLCOMP	GO:0044429|mitochondrial part	2	2.63	0.1252	33419-42-0, 518-28-5	14	313	1103	0.5	1	1	0.3076
CTD_CHEMICALS_GOENRICH_MOLFUNCT	GO:0005215|transporter activity	2	2.63	0.1253	79-94-7, 72-43-5	14	309	1090	0.5	1	1	0.3076
HTS_ACTIVE	autofluorescence:tox21-spec-hek293-p1_autofluor@blue_1	11	14.47	0.1273	517-28-2, 31127-54-5, 15905-32-5, 6559-91-7, 52479-85-3, 61445-50-9, 13473-26-2, 129-16-8, 131-55-5, 139233-53-7, 15086-94-9	68	587	6512	1.79	1	1	0.3122
CTD_CHEMICALS_GOENRICH_CELLCOMP	GO:0044454|nuclear chromosome part	8	10.53	0.1274	29767-20-2, 518-28-5, 79-94-7, 2971-36-0, 68392-35-8, 33419-42-0, 79-95-8, 72-43-5	14	346	1103	1.82	1	1	0.3122
LEADSCOPE_TOXICITY	Rodent Carcinogenicity: carc rodent	2	2.63	0.1285	569-57-3, 14868-03-2	66	483	7259	0.46	1	1	0.3144
CTD_CHEMICALS_DISEASES	Bone Diseases	4	5.26	0.1291	77-09-8, 29767-20-2, 131-55-5, 85-60-9	25	136	2583	3.04	1	1	0.3153
MULTICASE_TOX_PREDICTION	RCA human cholestasis	2	2.63	0.1293	30299-08-2, 52479-85-3	67	520	7882	0.45	1	1	0.3153
TOXCAST_ACTIVE	NVS_ENZ_rMAOBC	3	3.95	0.1295	81-90-3, 131-55-5, 72-43-5	18	63	1694	4.48	1	1	0.3153
TOXCAST_ACTIVE	NVS_GPCR_hDRD2s	3	3.95	0.1295	2971-36-0, 68392-35-8, 1478-61-1	18	63	1694	4.48	1	1	0.3153
CTD_CHEMICALS_GENES	AR	5	6.58	0.1301	72-43-5, 79-95-8, 29767-20-2, 80-05-7, 2971-36-0	22	215	2273	2.4	1	1	0.3154
CTD_CHEMICALS_DISEASES	Proteus Syndrome	3	3.95	0.1302	79-95-8, 143-74-8, 79-94-7	25	68	2583	4.56	1	1	0.3154
CTD_CHEMICALS_GOENRICH_CELLCOMP	GO:0005694|chromosome	8	10.53	0.1306	29767-20-2, 518-28-5, 79-94-7, 2971-36-0, 68392-35-8, 33419-42-0, 72-43-5, 79-95-8	14	353	1103	1.79	1	1	0.3154
HTS_STRONGACTIVE	cardiac action potential mediation:tox21-herg-u2os-p1_herg-blocker_1	5	6.58	0.1306	72-43-5, 68392-35-8, 1478-61-1, 68047-06-3, 77-09-8	61	665	4870	0.6	1	1	0.3154
TOXINS_TARGETS	ADORA1	2	2.63	0.1306	68047-06-3, 77-09-8	14	13	1220	13.41	1	1	0.3154
CTD_CHEMICALS_DISEASES	Breast Neoplasms	13	17.11	0.1306	77-09-8, 129-16-8, 67227-56-9, 2624-43-3, 85-60-9, 30299-08-2, 569-57-3, 80-05-7, 31477-60-8, 79-94-7, 518-28-5, 68392-35-8, 72-43-5	25	891	2583	1.51	1	1	0.3154
LEADSCOPE_TOXICITY	Genetic Toxicity: mouse lymphoma	16	21.05	0.1309	131-54-4, 569-57-3, 3236-71-3, 14868-03-2, 41351-30-8, 518-28-5, 1260-17-9, 68047-06-3, 68392-35-8, 517-28-2, 139233-53-7, 2624-43-3, 1565-94-2, 61445-50-9, 52479-85-3, 31127-54-5	66	1180	7259	1.49	1	1	0.3154
CTD_CHEMICALS_DISEASES	Hypothyroidism	2	2.63	0.131	16423-68-0, 131-55-5	25	15	2583	13.78	1	1	0.3154
CTD_CHEMICALS_DISEASES	Unconsciousness	2	2.63	0.131	16423-68-0, 131-55-5	25	15	2583	13.78	1	1	0.3154
CTD_CHEMICALS_GOENRICH_CELLCOMP	GO:0044427|chromosomal part	8	10.53	0.1316	29767-20-2, 79-94-7, 518-28-5, 2971-36-0, 68392-35-8, 33419-42-0, 72-43-5, 79-95-8	14	355	1103	1.78	1	1	0.3165
MODE_CLASS	Receptor Partial Agonist	2	2.63	0.1321	569-57-3, 31477-60-8	10	23	1476	12.83	1	1	0.3173
CTD_CHEMICALS_GOENRICH_MOLFUNCT	GO:0008289|lipid binding	8	10.53	0.1322	518-28-5, 79-94-7, 2971-36-0, 68392-35-8, 33419-42-0, 72-43-5, 79-95-8, 29767-20-2	14	352	1090	1.77	1	1	0.3173
CTD_CHEMICALS_PATHWAYS	REACT:R-HSA-1168372|Downstream signaling events of B Cell Receptor (BCR)	5	6.58	0.1332	33419-42-0, 72-43-5, 518-28-5, 79-94-7, 80-05-7	12	176	939	2.22	1	1	0.3191
CTD_CHEMICALS_GOENRICH_CELLCOMP	GO:0000228|nuclear chromosome	8	10.53	0.1333	2971-36-0, 518-28-5, 79-94-7, 72-43-5, 79-95-8, 33419-42-0, 68392-35-8, 29767-20-2	14	358	1103	1.76	1	1	0.3191
CTD_CHEMICALS_PATHWAYS	REACT:R-HSA-392499|Metabolism of proteins	8	10.53	0.1342	518-28-5, 79-94-7, 2971-36-0, 68392-35-8, 33419-42-0, 72-43-5, 143-74-8, 67227-56-9	12	383	939	1.63	1	1	0.3209
TOXCAST_ACTIVE	ATG_CMV_CIS_up	7	9.21	0.1346	1478-61-1, 79-94-7, 79-95-8, 68392-35-8, 80-05-7, 131-55-5, 77-09-8	18	347	1694	1.9	1	1	0.321
CTD_CHEMICALS_GOENRICH_MOLFUNCT	GO:0140110|transcription regulator activity	8	10.53	0.1347	68392-35-8, 72-43-5, 79-95-8, 33419-42-0, 79-94-7, 518-28-5, 2971-36-0, 29767-20-2	14	356	1090	1.75	1	1	0.321
HTS_ACTIVE	autofluorescence:tox21-spec-hek293-p1_autofluor@blue_2	11	14.47	0.1348	61445-50-9, 15905-32-5, 31127-54-5, 517-28-2, 52479-85-3, 6559-91-7, 129-16-8, 131-55-5, 13473-26-2, 15086-94-9, 139233-53-7	68	609	6512	1.73	1	1	0.321
CTD_CHEMICALS_DISEASES	Sepsis	7	9.21	0.1351	1565-94-2, 518-28-5, 72-43-5, 33419-42-0, 80-05-7, 67227-56-9, 29767-20-2	25	363	2583	1.99	1	1	0.321
CTD_CHEMICALS_DISEASES	Psychoses, Substance-Induced	5	6.58	0.1351	29767-20-2, 85-60-9, 129-16-8, 569-57-3, 77-09-8	25	216	2583	2.39	1	1	0.321
MULTICASE_TOX_PREDICTION	MRP5 inhibition at 50uM	61	80.26	0.1358	61445-50-9, 1565-94-2, 125-13-3, 52479-85-3, 21850-44-2, 27955-94-8, 2624-43-3, 13473-26-2, 10040-45-6, 1943-97-1, 115-39-9, 77-40-7, 79-94-7, 3236-71-3, 5613-46-7, 22345-47-7, 27072-45-3, 68392-35-8, 14868-03-2, 30299-08-2, 518-47-8, 85-60-9, 2971-36-0, 115-33-3, 14008-48-1, 41351-30-8, 1470-79-7, 31477-60-8, 131-54-4, 6807-17-6, 118-82-1, 4162-45-2, 79-97-0, 15086-94-9, 126-00-1, 517-28-2, 72-4…	67	7501	7882	0.96	1	1	0.3222
MESH	Benzophenones	2	2.63	0.1361	131-55-5, 52479-85-3	42	19	5355	13.42	1	1	0.3225
CTD_CHEMICALS_GOENRICH_MOLFUNCT	GO:0140097|catalytic activity, acting on DNA	3	3.95	0.1366	518-28-5, 80-05-7, 33419-42-0	14	55	1090	4.25	1	1	0.3235
CTD_CHEMICALS_DISEASES	Inflammation	3	3.95	0.1368	67227-56-9, 30299-08-2, 518-28-5	25	573	2583	0.54	1	1	0.3235
CTD_GOSLIM_BIOPROCESS	GO:0030198|extracellular matrix organization	8	10.53	0.1373	68392-35-8, 33419-42-0, 72-43-5, 518-28-5, 79-94-7, 2971-36-0, 67227-56-9, 80-05-7	16	400	1491	1.86	1	1	0.3243
CTD_CHEMICALS_PATHWAYS	KEGG:hsa05210|Colorectal cancer	5	6.58	0.1376	518-28-5, 79-94-7, 33419-42-0, 72-43-5, 68392-35-8	12	178	939	2.2	1	1	0.3245
CTD_CHEMICALS_DISEASES	Copper-Overload Cirrhosis	5	6.58	0.1385	68392-35-8, 33419-42-0, 72-43-5, 518-28-5, 67227-56-9	25	218	2583	2.37	1	1	0.3261
TOXCAST_ACTIVE	BSK_KF3CT_ICAM1_down	4	5.26	0.1387	79-94-7, 27955-94-8, 68392-35-8, 2971-36-0	18	131	1694	2.87	1	1	0.3261
MULTICASE_TOX_PREDICTION	RCA reproductive toxicity in females, mouse	7	9.21	0.1389	68047-06-3, 68392-35-8, 1943-97-1, 569-57-3, 31477-60-8, 2624-43-3, 14868-03-2	67	386	7882	2.13	1	1	0.3261
LEADSCOPE_TOXICITY	Rodent Carcinogenicity: carc rat	9	11.84	0.1389	68392-35-8, 68047-06-3, 30299-08-2, 14868-03-2, 2624-43-3, 3236-71-3, 38103-06-9, 31477-60-8, 569-57-3	66	521	7259	1.9	1	1	0.3261
TOXCAST_ACTIVE	BSK_CASM3C_Thrombomodulin_up	5	6.58	0.1404	72-43-5, 77-40-7, 2971-36-0, 1478-61-1, 79-94-7	18	205	1694	2.3	1	1	0.3293
CTD_CHEMICALS_GOENRICH_MOLFUNCT	GO:0051427|hormone receptor binding	4	5.26	0.1411	33419-42-0, 80-05-7, 518-28-5, 68392-35-8	14	112	1090	2.78	1	1	0.3305
CTD_CHEMICALS_PATHWAYS	KEGG:hsa04510|Focal adhesion	6	7.89	0.1425	72-43-5, 33419-42-0, 68392-35-8, 80-05-7, 79-94-7, 518-28-5	12	221	939	2.12	1	1	0.3335
PHARMACTIONLIST	Estrogens, Non-Steroidal	2	2.63	0.1428	80-05-7, 569-57-3	27	16	2720	12.59	1	1	0.3337
TOXCAST_ACTIVE	Tox21_VDR_BLA_Agonist_viability	5	6.58	0.1442	68392-35-8, 2971-36-0, 1478-61-1, 16423-68-0, 79-94-7	18	207	1694	2.27	1	1	0.3365
DRUGBANK_TRANSPORTERS	ABCG2	2	2.63	0.1451	29767-20-2, 33419-42-0	2	66	455	6.89	1	1	0.3381
CTD_CHEMICALS_DISEASES	Peritoneal Neoplasms	3	3.95	0.1461	33419-42-0, 143-74-8, 2624-43-3	25	73	2583	4.25	1	1	0.3401
TOXPRINT_STRUCTURE	bond:COH_alcohol_aliphatic_generic	8	10.53	0.1465	33419-42-0, 6559-91-7, 4162-45-2, 1565-94-2, 517-28-2, 518-28-5, 117091-64-2, 29767-20-2	67	1481	8195	0.66	1	1	0.3407
PHARMACTIONLIST	Hormones, Hormone Substitutes, and Hormone Antagonists	4	5.26	0.1467	80-05-7, 68047-06-3, 68392-35-8, 569-57-3	27	140	2720	2.88	1	1	0.3408
CTD_CHEMICALS_DISEASES	Intestinal Neoplasms	5	6.58	0.1471	518-28-5, 2971-36-0, 68392-35-8, 72-43-5, 33419-42-0	25	223	2583	2.32	1	1	0.341
CTD_CHEMICALS_DISEASES	VACTERL Association With Hydrocephalus	2	2.63	0.1472	79-94-7, 79-95-8	25	17	2583	12.16	1	1	0.341
HTS_ACTIVE	generic stess:tox21-cre-agonist-p1_cre-agonist_1	5	6.58	0.1478	79-95-8, 4162-45-2, 79-97-0, 5613-46-7, 518-28-5	68	199	6512	2.41	1	1	0.3422
TOXCAST_ACTIVE	ATG_TA_CIS_up	4	5.26	0.1481	80-05-7, 27955-94-8, 79-94-7, 77-09-8	18	135	1694	2.79	1	1	0.3425
CTD_CHEMICALS_GOENRICH_CELLCOMP	GO:0031981|nuclear lumen	9	11.84	0.1488	143-74-8, 29767-20-2, 2971-36-0, 518-28-5, 79-94-7, 33419-42-0, 72-43-5, 79-95-8, 68392-35-8	14	427	1103	1.66	1	1	0.3436
TOXINS_TARGETS	HTR5A	2	2.63	0.1492	2971-36-0, 68047-06-3	14	15	1220	11.62	1	1	0.3442
TOXCAST_ACTIVE	NVS_ENZ_hPTPN6_Activator	2	2.63	0.1496	77-40-7, 77-09-8	18	16	1694	11.76	1	1	0.3447
CTD_CHEMICALS_DISEASES	Recurrence	5	6.58	0.1506	29767-20-2, 72-43-5, 79-94-7, 2971-36-0, 31477-60-8	25	225	2583	2.3	1	1	0.3465
CTD_CHEMICALS_PATHWAYS	KEGG:hsa01522|Endocrine resistance	6	7.89	0.1519	68392-35-8, 72-43-5, 33419-42-0, 518-28-5, 79-94-7, 2971-36-0	12	232	939	2.02	1	1	0.3492
CTD_CHEMICALS_PATHWAYS	KEGG:hsa04012|ErbB signaling pathway	3	3.95	0.1524	518-28-5, 68392-35-8, 33419-42-0	12	60	939	3.91	1	1	0.3499
HTS_STRONGACTIVE	cytotoxicity:tox21-rt-viability-hepg2-p1_viability@flor_16h_1	7	9.21	0.1529	68392-35-8, 15905-32-5, 15086-94-9, 118-82-1, 16423-68-0, 518-47-8, 13473-26-2	61	277	4870	2.02	1	1	0.3507
CTD_CHEMICALS_GOENRICH_MOLFUNCT	GO:0003713|transcription coactivator activity	4	5.26	0.1555	80-05-7, 33419-42-0, 518-28-5, 68392-35-8	14	117	1090	2.66	1	1	0.3553
CTD_CHEMICALS_GOENRICH_MOLFUNCT	GO:0004364|glutathione transferase activity	2	2.63	0.1555	33419-42-0, 518-28-5	14	14	1090	11.12	1	1	0.3553
CTD_CHEMICALS_GOENRICH_MOLFUNCT	GO:0005096|GTPase activator activity	2	2.63	0.1555	79-94-7, 80-05-7	14	14	1090	11.12	1	1	0.3553
CTD_CHEMICALS_GOENRICH_MOLFUNCT	GO:0008092|cytoskeletal protein binding	6	7.89	0.156	143-74-8, 79-94-7, 518-28-5, 68392-35-8, 72-43-5, 33419-42-0	14	223	1090	2.09	1	1	0.3561
CTD_CHEMICALS_PATHWAYS	REACT:R-HSA-2730905|Role of LAT2/NTAL/LAB on calcium mobilization	3	3.95	0.1566	33419-42-0, 79-94-7, 518-28-5	12	61	939	3.85	1	1	0.3569
CTD_CHEMICALS_PATHWAYS	KEGG:hsa05203|Viral carcinogenesis	6	7.89	0.1583	518-28-5, 79-94-7, 2971-36-0, 80-05-7, 72-43-5, 33419-42-0	12	238	939	1.97	1	1	0.3605
HTS_STRONGACTIVE	counter screen (cell viability):tox21-erb-bla-antagonist-p1_viability_1	12	15.79	0.1585	68047-06-3, 4221-68-5, 843-55-0, 4162-45-2, 68392-35-8, 76-60-8, 79-97-0, 13080-86-9, 5613-46-7, 1943-97-1, 24038-68-4, 85-60-9	61	588	4870	1.63	1	1	0.3605
TOXCAST_ACTIVE	BSK_SAg_SRB_down	6	7.89	0.1587	27955-94-8, 68392-35-8, 72-43-5, 79-94-7, 2971-36-0, 1478-61-1	18	252	1694	2.24	1	1	0.3606
CTD_CHEMICALS_DISEASES	Cardiomyopathies	2	2.63	0.1591	518-28-5, 1565-94-2	25	408	2583	0.51	1	1	0.3609
PHARMACTIONLIST	Estrogen Antagonists	2	2.63	0.1592	68392-35-8, 68047-06-3	27	18	2720	11.19	1	1	0.3609
CTD_CHEMICALS_DISEASES	Precursor T-Cell Lymphoblastic Leukemia-Lymphoma	4	5.26	0.1597	33419-42-0, 79-94-7, 143-74-8, 68392-35-8	25	150	2583	2.76	1	1	0.3616
CTD_CHEMICALS_DISEASES	Fibrosis	2	2.63	0.1606	143-74-8, 16423-68-0	25	390	2583	0.53	1	1	0.3627
TOXPRINT_STRUCTURE	group:carbohydrate_hexopyranose_glucose	3	3.95	0.1607	117091-64-2, 33419-42-0, 29767-20-2	67	89	8195	4.12	1	1	0.3627
CTD_CHEMICALS_PATHWAYS	REACT:R-HSA-1257604|PIP3 activates AKT signaling	3	3.95	0.1607	33419-42-0, 79-94-7, 518-28-5	12	62	939	3.79	1	1	0.3627
CTD_CHEMICALS_DISEASES	Skin Neoplasms	2	2.63	0.1616	518-28-5, 1565-94-2	25	428	2583	0.48	1	1	0.3642
PHARMACTIONLIST	Toxic Actions	2	2.63	0.1626	80-05-7, 72-43-5	27	405	2720	0.5	1	1	0.366
TOXCAST_ACTIVE	BSK_CASM3C_VCAM1_down	4	5.26	0.1628	1478-61-1, 68392-35-8, 79-94-7, 27955-94-8	18	141	1694	2.67	1	1	0.366
DRUGBANK_TARGETS	SHBG	2	2.63	0.1633	68392-35-8, 77-09-8	12	20	1249	10.41	1	1	0.3668
TOXCAST_ACTIVE	NVS_ADME_rCYP3A2	3	3.95	0.1645	80-05-7, 72-43-5, 2971-36-0	18	73	1694	3.87	1	1	0.3686
TOXCAST_ACTIVE	NVS_GPCR_hAdra2C	3	3.95	0.1645	2971-36-0, 68392-35-8, 1478-61-1	18	73	1694	3.87	1	1	0.3686
TOXCAST_ACTIVE	APR_HepG2_MitoticArrest_72h_up	6	7.89	0.165	80-05-7, 2971-36-0, 79-94-7, 77-09-8, 72-43-5, 27955-94-8	18	262	1694	2.16	1	1	0.3693
CTD_CHEMICALS_GOENRICH_MOLFUNCT	GO:0003684|damaged DNA binding	2	2.63	0.1657	33419-42-0, 518-28-5	14	15	1090	10.38	1	1	0.3704
TOXINS_TARGETS	TTR	2	2.63	0.1675	79-94-7, 79-95-8	14	17	1220	10.25	1	1	0.3741
CTD_CHEMICALS_DISEASES	Hepatolenticular Degeneration	6	7.89	0.1695	33419-42-0, 72-43-5, 2971-36-0, 67227-56-9, 80-05-7, 1565-94-2	25	274	2583	2.26	1	1	0.3781
CTD_CHEMICALS_DISEASES	Stereotypic Movement Disorder	2	2.63	0.1709	16423-68-0, 131-55-5	25	20	2583	10.33	1	1	0.3805
HTS_STRONGACTIVE	counter screen (cell viability):tox21-ms-p53-p1_viability_1	4	5.26	0.171	603-50-9, 115-33-3, 115-39-9, 125-13-3	61	116	4870	2.75	1	1	0.3805
CTD_CHEMICALS_GOENRICH_CELLCOMP	GO:0044428|nuclear part	9	11.84	0.1713	143-74-8, 29767-20-2, 2971-36-0, 79-94-7, 518-28-5, 33419-42-0, 79-95-8, 72-43-5, 68392-35-8	14	468	1103	1.52	1	1	0.3808
LEADSCOPE_TOXICITY	Reproductive Toxicity: repro rodent male	3	3.95	0.1717	34487-61-1, 115-39-9, 76-60-8	66	604	7259	0.55	1	1	0.3814
CTD_CHEMICALS_GOENRICH_CELLCOMP	GO:0005911|cell-cell junction	4	5.26	0.172	518-28-5, 143-74-8, 80-05-7, 33419-42-0	14	124	1103	2.54	1	1	0.3815
LEADSCOPE_TOXICITY	Genetic Toxicity: mam. mutation DL	7	9.21	0.1733	61445-50-9, 52479-85-3, 31127-54-5, 81-90-3, 1260-17-9, 611-99-4, 34487-61-1	66	1174	7259	0.66	1	1	0.3832
CTD_CHEMICALS_PATHWAYS	REACT:R-HSA-180292|GAB1 signalosome	3	3.95	0.1735	33419-42-0, 79-94-7, 518-28-5	12	65	939	3.61	1	1	0.3832
CTD_CHEMICALS_PATHWAYS	REACT:R-HSA-195721|Signaling by Wnt	3	3.95	0.1735	79-95-8, 79-94-7, 80-05-7	12	65	939	3.61	1	1	0.3832
TOXPRINT_STRUCTURE	chain:aromaticAlkane_Ph-C1_acyclic_connect_H_gt_1	7	9.21	0.1735	620-92-8, 5613-46-7, 118-82-1, 76-60-8, 79-97-0, 125-31-5, 85-60-9	67	1258	8195	0.68	1	1	0.3832
MESH	Benzylidene Compounds	2	2.63	0.1752	569-57-3, 68047-06-3	42	25	5355	10.2	1	1	0.3861
TOXCAST_ACTIVE	NVS_ENZ_hAMPKa1	2	2.63	0.1752	2971-36-0, 1478-61-1	18	19	1694	9.91	1	1	0.3861
CTD_CHEMICALS_DISEASES	Chronobiology Disorders	3	3.95	0.1757	79-94-7, 79-95-8, 30299-08-2	25	82	2583	3.78	1	1	0.3867
HTS_STRONGACTIVE	cytotoxicity:tox21-rt-viability-hek293-p1_viability@flor_32h_1	7	9.21	0.1778	15905-32-5, 68047-06-3, 13473-26-2, 16423-68-0, 518-47-8, 6807-17-6, 15086-94-9	61	296	4870	1.89	1	1	0.3908
CTD_CHEMICALS_GOENRICH_CELLCOMP	GO:0005667|transcription factor complex	4	5.26	0.178	79-94-7, 518-28-5, 33419-42-0, 80-05-7	14	126	1103	2.5	1	1	0.3909
CTD_CHEMICALS_DISEASES	Helicobacter Infections	2	2.63	0.1786	68392-35-8, 143-74-8	25	21	2583	9.84	1	1	0.3919
TOXCAST_ACTIVE	NVS_ADME_hCYP3A4	3	3.95	0.1789	131-55-5, 1478-61-1, 2971-36-0	18	77	1694	3.67	1	1	0.3921
ACTIVITY_CLASS	Non-DNA reactive antiproliferative agent	2	2.63	0.1795	33419-42-0, 518-28-5	4	39	612	7.85	1	1	0.3929
TOXCAST_ACTIVE	BSK_BE3C_SRB_down	4	5.26	0.1804	72-43-5, 2971-36-0, 79-94-7, 68392-35-8	18	148	1694	2.54	1	1	0.3945
MESH	Heterocyclic Compounds	10	13.16	0.1807	115-33-3, 15905-32-5, 14008-48-1, 517-28-2, 125-13-3, 67227-56-9, 10040-45-6, 518-47-8, 13473-26-2, 22345-47-7	42	1756	5355	0.73	1	1	0.3947
MULTICASE_TOX_PREDICTION	RCA fetal dysmorphogenesis, rodent	5	6.58	0.181	1260-17-9, 517-28-2, 29767-20-2, 33419-42-0, 6559-91-7	67	951	7882	0.62	1	1	0.3948
CTD_CHEMICALS_DISEASES	Thrombocythemia, Essential	3	3.95	0.1824	67227-56-9, 72-43-5, 29767-20-2	25	84	2583	3.69	1	1	0.3969
TOXPRINT_STRUCTURE	chain:aromaticAlkane_Ar-C_meta	4	5.26	0.1826	85-60-9, 79-97-0, 5613-46-7, 118-82-1	67	183	8195	2.67	1	1	0.3969
CTD_CHEMICALS_DISEASES	Obesity	5	6.58	0.1826	518-28-5, 77-09-8, 131-55-5, 85-60-9, 30299-08-2	25	810	2583	0.64	1	1	0.3969
HTS_ACTIVE	mitochondrial membrane permeability:tox21-mitotox-p1_mmp-activator_1	2	2.63	0.1831	29767-20-2, 31477-60-8	68	368	6512	0.52	1	1	0.3976
TOXCAST_ACTIVE	NVS_ENZ_hSIRT3	2	2.63	0.1836	1478-61-1, 2971-36-0	18	20	1694	9.41	1	1	0.3983
CTD_CHEMICALS_DISEASES	Diabetes Mellitus, Type 2	8	10.53	0.1847	79-95-8, 2971-36-0, 30299-08-2, 518-28-5, 67227-56-9, 131-55-5, 2624-43-3, 143-74-8	25	476	2583	1.74	1	1	0.4002
CTD_CHEMICALS_GENES	TTR	2	2.63	0.1855	79-95-8, 79-94-7	22	22	2273	9.39	1	1	0.4012
TOXCAST_ACTIVE	BSK_BE3C_TGFb1_down	4	5.26	0.1856	79-94-7, 27955-94-8, 68392-35-8, 1478-61-1	18	150	1694	2.51	1	1	0.4012
TOXPRINT_STRUCTURE	bond:CN_amine_sec-NH_alkyl	2	2.63	0.186	139233-53-7, 67227-56-9	67	491	8195	0.5	1	1	0.4012
CTD_CHEMICALS_DISEASES	Chemical and Drug Induced Liver Injury	12	15.79	0.1862	79-95-8, 52479-85-3, 30299-08-2, 129-16-8, 131-55-5, 77-09-8, 68392-35-8, 2971-36-0, 29767-20-2, 16423-68-0, 80-05-7, 569-57-3	25	830	2583	1.49	1	1	0.4012
TOXCAST_ACTIVE	NVS_ADME_hCYP2C18	3	3.95	0.1863	72-43-5, 80-05-7, 2971-36-0	18	79	1694	3.57	1	1	0.4012
CTD_CHEMICALS_DISEASES	Scleroatonic muscular dystrophy	2	2.63	0.1863	79-95-8, 67227-56-9	25	22	2583	9.39	1	1	0.4012
CTD_CHEMICALS_DISEASES	Microsatellite Instability	3	3.95	0.1892	2971-36-0, 80-05-7, 79-95-8	25	86	2583	3.6	1	1	0.4069
CTD_CHEMICALS_PATHWAYS	REACT:R-HSA-1433557|Signaling by SCF-KIT	7	9.21	0.19	68392-35-8, 72-43-5, 33419-42-0, 79-94-7, 518-28-5, 80-05-7, 2971-36-0	12	303	939	1.81	1	1	0.4082
CTD_GOSLIM_BIOPROCESS	GO:0044281|small molecule metabolic process	13	17.11	0.1915	33419-42-0, 1565-94-2, 30299-08-2, 77-09-8, 67227-56-9, 68392-35-8, 72-43-5, 518-28-5, 79-94-7, 2971-36-0, 29767-20-2, 16423-68-0, 80-05-7	16	937	1491	1.29	1	1	0.4109
CTD_CHEMICALS_DISEASES	Atherosclerosis	8	10.53	0.193	80-05-7, 131-55-5, 77-09-8, 85-60-9, 29767-20-2, 30299-08-2, 79-94-7, 518-28-5	25	487	2583	1.7	1	1	0.4135
HTS_STRONGACTIVE	cytotoxicity:tox21-rt-viability-hek293-p1_viability@glo_32h_1	17	22.37	0.1931	518-28-5, 4221-68-5, 68047-06-3, 620-92-8, 68392-35-8, 131-54-4, 13080-86-9, 5613-46-7, 24038-68-4, 14868-03-2, 1565-94-2, 61445-50-9, 79-97-0, 4162-45-2, 33419-42-0, 1943-97-1, 85-60-9	61	969	4870	1.4	1	1	0.4135
CTD_CHEMICALS_PATHWAYS	REACT:R-HSA-187037|NGF signalling via TRKA from the plasma membrane	7	9.21	0.1947	68392-35-8, 33419-42-0, 72-43-5, 518-28-5, 79-94-7, 2971-36-0, 80-05-7	12	313	939	1.75	1	1	0.4164
CTD_CHEMICALS_PATHWAYS	REACT:R-HSA-73894|DNA Repair	3	3.95	0.1951	518-28-5, 33419-42-0, 80-05-7	12	70	939	3.35	1	1	0.4168
CTD_CHEMICALS_GOENRICH_CELLCOMP	GO:0005635|nuclear envelope	4	5.26	0.1965	518-28-5, 79-94-7, 80-05-7, 33419-42-0	14	132	1103	2.39	1	1	0.4193
CTD_CHEMICALS_PATHWAYS	REACT:R-HSA-186797|Signaling by PDGF	7	9.21	0.1973	518-28-5, 79-94-7, 2971-36-0, 80-05-7, 68392-35-8, 72-43-5, 33419-42-0	12	317	939	1.73	1	1	0.4205
CTD_GOSLIM_BIOPROCESS	GO:0048646|anatomical structure formation involved in morphogenesis	11	14.47	0.1981	1565-94-2, 33419-42-0, 79-95-8, 143-74-8, 67227-56-9, 79-94-7, 518-28-5, 2971-36-0, 68392-35-8, 72-43-5, 80-05-7	16	726	1491	1.41	1	1	0.4219
PHARMACTIONLIST	Estrogens	2	2.63	0.1989	569-57-3, 80-05-7	27	23	2720	8.76	1	1	0.4232
CTD_CHEMICALS_DISEASES	Encephalomyelitis, Autoimmune, Experimental	3	3.95	0.1994	30299-08-2, 80-05-7, 33419-42-0	25	89	2583	3.48	1	1	0.4238
CTD_CHEMICALS_GOENRICH_CELLCOMP	GO:0030054|cell junction	6	7.89	0.2	33419-42-0, 68392-35-8, 2971-36-0, 518-28-5, 79-94-7, 143-74-8	14	260	1103	1.82	1	1	0.424
TOXCAST_ACTIVE	NVS_ENZ_hPI3Ka	2	2.63	0.2001	80-05-7, 2971-36-0	18	22	1694	8.56	1	1	0.424
CTD_CHEMICALS_PATHWAYS	REACT:R-HSA-1280215|Cytokine Signaling in Immune system	6	7.89	0.2002	68392-35-8, 33419-42-0, 72-43-5, 79-94-7, 518-28-5, 2971-36-0	12	618	939	0.76	1	1	0.424
CTD_CHEMICALS_GENES	ODC1	2	2.63	0.2006	29767-20-2, 518-28-5	22	24	2273	8.61	1	1	0.4245
TOXCAST_ACTIVE	NVS_GPCR_gOpiateK	3	3.95	0.2011	80-05-7, 1478-61-1, 77-09-8	18	83	1694	3.4	1	1	0.425
CTD_GOSLIM_BIOPROCESS	GO:0007009|plasma membrane organization	3	3.95	0.2016	72-43-5, 80-05-7, 2971-36-0	16	83	1491	3.37	1	1	0.4255
CTD_CHEMICALS_DISEASES	Infertility, Female	3	3.95	0.2017	77-09-8, 16423-68-0, 85-60-9	25	514	2583	0.6	1	1	0.4255
HTS_STRONGACTIVE	counter screen (cell viability):tox21-p53-bla-p5_viability_1	6	7.89	0.2021	79-94-7, 115-33-3, 3236-71-3, 13473-26-2, 125-13-3, 85-60-9	61	227	4870	2.11	1	1	0.4257
CTD_CHEMICALS_PATHWAYS	REACT:R-HSA-6791312|TP53 Regulates Transcription of Cell Cycle Genes	2	2.63	0.2023	518-28-5, 33419-42-0	12	19	939	8.24	1	1	0.4257
CTD_CHEMICALS_DISEASES	Liver Diseases	3	3.95	0.2025	518-28-5, 1565-94-2, 79-94-7	25	507	2583	0.61	1	1	0.4257
TOXCAST_ACTIVE	BSK_BE3C_uPA_down	4	5.26	0.204	68392-35-8, 79-94-7, 27955-94-8, 2971-36-0	18	157	1694	2.4	1	1	0.4282
TOXPRINT_STRUCTURE	bond:CX_halide_alkenyl-X_generic	3	3.95	0.2041	569-57-3, 14868-03-2, 16423-68-0	67	104	8195	3.53	1	1	0.4282
LEADSCOPE_TOXICITY	Genetic Toxicity: In vitro composite	6	7.89	0.2047	52479-85-3, 31127-54-5, 61445-50-9, 41351-30-8, 517-28-2, 1260-17-9	66	1011	7259	0.65	1	1	0.429
HTS_STRONGACTIVE	counter screen (cell viability):tox21-ror-cho-viability-p1_viability_1	6	7.89	0.2058	4221-68-5, 115-39-9, 13473-26-2, 76-60-8, 85-60-9, 24038-68-4	61	230	4870	2.08	1	1	0.4304
CTD_CHEMICALS_GOENRICH_CELLCOMP	GO:0044297|cell body	2	2.63	0.2058	79-94-7, 72-43-5	14	271	1103	0.58	1	1	0.4304
HTS_STRONGACTIVE	cytotoxicity:tox21-rt-viability-hepg2-p1_viability@flor_8h_1	6	7.89	0.207	139233-53-7, 15086-94-9, 518-47-8, 16423-68-0, 13473-26-2, 15905-32-5	61	231	4870	2.07	1	1	0.4325
TOXINS_TARGETS	NFE2L2	3	3.95	0.2077	68047-06-3, 72-43-5, 79-94-7	14	80	1220	3.27	1	1	0.4335
CTD_CHEMICALS_GOENRICH_CELLCOMP	GO:0034774|secretory granule lumen	7	9.21	0.2086	33419-42-0, 72-43-5, 68392-35-8, 80-05-7, 2971-36-0, 79-94-7, 518-28-5	14	308	1103	1.79	1	1	0.4348
CTD_CHEMICALS_DISEASES	Meier-Gorlin syndrome	2	2.63	0.209	68392-35-8, 33419-42-0	25	25	2583	8.27	1	1	0.4352
TOXPRINT_STRUCTURE	bond:CX_halide_aromatic-X_generic	14	18.42	0.2093	67227-56-9, 129-16-8, 13473-26-2, 15086-94-9, 79-95-8, 4162-45-2, 21850-44-2, 76-60-8, 25327-89-3, 16423-68-0, 15905-32-5, 71-67-0, 115-39-9, 79-94-7	67	1148	8195	1.49	1	1	0.4355
CTD_CHEMICALS_DISEASES	Prostatic Neoplasms	7	9.21	0.21	569-57-3, 518-28-5, 79-94-7, 85-60-9, 77-09-8, 129-16-8, 30299-08-2	25	988	2583	0.73	1	1	0.4363
HTS_STRONGACTIVE	counter screen (cell viability):tox21-ppard-bla-antagonist-p1_viability_1	8	10.53	0.2113	3236-71-3, 1943-97-1, 85-60-9, 68047-06-3, 1565-94-2, 843-55-0, 4162-45-2, 14008-48-1	61	363	4870	1.76	1	1	0.4382
HTS_STRONGACTIVE	counter screen (cell viability):tox21-pparg-bla-antagonist-p1_viability_1	8	10.53	0.2113	68047-06-3, 79-94-7, 843-55-0, 4162-45-2, 68392-35-8, 3236-71-3, 1943-97-1, 85-60-9	61	363	4870	1.76	1	1	0.4382
TOXINS_TARGETS	CHRM5	2	2.63	0.2116	2971-36-0, 68047-06-3	14	22	1220	7.92	1	1	0.4383
CTD_CHEMICALS_GOENRICH_CELLCOMP	GO:0042470|melanosome	2	2.63	0.2127	518-28-5, 33419-42-0	14	20	1103	7.88	1	1	0.4398
CTD_CHEMICALS_GOENRICH_CELLCOMP	GO:0048770|pigment granule	2	2.63	0.2127	33419-42-0, 518-28-5	14	20	1103	7.88	1	1	0.4398
HTS_ACTIVE	cytotoxicity:tox21-rt-viability-hepg2-p1_viability@flor_0h_1	6	7.89	0.2131	15905-32-5, 16423-68-0, 518-47-8, 13473-26-2, 139233-53-7, 15086-94-9	68	281	6512	2.04	1	1	0.44
CTD_CHEMICALS_GOENRICH_CELLCOMP	GO:0005622|intracellular	8	10.53	0.2143	29767-20-2, 16423-68-0, 72-43-5, 2971-36-0, 67227-56-9, 143-74-8, 79-95-8, 1565-94-2	14	786	1103	0.8	1	1	0.4416
CTD_CHEMICALS_GOENRICH_CELLCOMP	GO:0044424|intracellular part	8	10.53	0.2143	29767-20-2, 16423-68-0, 72-43-5, 2971-36-0, 143-74-8, 67227-56-9, 79-95-8, 1565-94-2	14	786	1103	0.8	1	1	0.4416
CTD_CHEMICALS_DISEASES	No-Reflow Phenomenon	2	2.63	0.2164	72-43-5, 143-74-8	25	26	2583	7.95	1	1	0.4455
CTD_CHEMICALS_PATHWAYS	REACT:R-HSA-198203|PI3K/AKT activation	3	3.95	0.2171	79-94-7, 33419-42-0, 518-28-5	12	75	939	3.13	1	1	0.4465
CTD_CHEMICALS_PATHWAYS	KEGG:hsa04015|Rap1 signaling pathway	4	5.26	0.2176	80-05-7, 72-43-5, 2971-36-0, 68392-35-8	12	140	939	2.24	1	1	0.447
CTD_CHEMICALS_DISEASES	Lymphoma, Large B-Cell, Diffuse	6	7.89	0.2181	1565-94-2, 67227-56-9, 80-05-7, 30299-08-2, 68392-35-8, 29767-20-2	25	328	2583	1.89	1	1	0.4475
CTD_CHEMICALS_GOENRICH_CELLCOMP	GO:0016324|apical plasma membrane	4	5.26	0.2187	518-28-5, 68392-35-8, 33419-42-0, 80-05-7	14	139	1103	2.27	1	1	0.4484
CTD_CHEMICALS_DISEASES	Non-alcoholic Fatty Liver Disease	9	11.84	0.2212	129-16-8, 131-55-5, 77-09-8, 569-57-3, 2971-36-0, 30299-08-2, 518-28-5, 79-95-8, 68392-35-8	25	585	2583	1.59	1	1	0.4531
CTD_CHEMICALS_PATHWAYS	KEGG:hsa05205|Proteoglycans in cancer	7	9.21	0.2216	80-05-7, 2971-36-0, 79-94-7, 518-28-5, 33419-42-0, 72-43-5, 68392-35-8	12	342	939	1.6	1	1	0.4533
CTD_CHEMICALS_GOENRICH_CELLCOMP	GO:0060205|cytoplasmic vesicle lumen	7	9.21	0.2218	2971-36-0, 80-05-7, 518-28-5, 79-94-7, 33419-42-0, 72-43-5, 68392-35-8	14	326	1103	1.69	1	1	0.4533
CTD_CHEMICALS_GOENRICH_CELLCOMP	GO:0098588|bounding membrane of organelle	7	9.21	0.2228	518-28-5, 79-94-7, 143-74-8, 2971-36-0, 68392-35-8, 33419-42-0, 72-43-5	14	327	1103	1.69	1	1	0.4548
CTD_CHEMICALS_DISEASES	Protoporphyria, Erythropoietic	2	2.63	0.2238	33419-42-0, 79-94-7	25	27	2583	7.65	1	1	0.4564
TOXCAST_ACTIVE	APR_HepG2_MitoMembPot_1h_dn	2	2.63	0.2243	2971-36-0, 72-43-5	18	25	1694	7.53	1	1	0.4565
LEADSCOPE_TOXICITY	Genetic Toxicity: yeast	7	9.21	0.2243	131-54-4, 41351-30-8, 34487-61-1, 1260-17-9, 143-74-8, 30299-08-2, 125-31-5	66	1111	7259	0.69	1	1	0.4565
CTD_CHEMICALS_GENES	MAPK3	4	5.26	0.2261	72-43-5, 68392-35-8, 80-05-7, 79-94-7	22	179	2273	2.31	1	1	0.4597
LEADSCOPE_TOXICITY	Rodent Carcinogenicity: carc mouse male	11	14.47	0.2263	79-94-7, 25327-89-3, 14868-03-2, 38103-06-9, 569-57-3, 4162-45-2, 21850-44-2, 52479-85-3, 13473-26-2, 129-16-8, 15086-94-9	66	782	7259	1.55	1	1	0.4597
HTS_STRONGACTIVE	thyroid homeostasis:tox21-trhr-hek293-p1_trhr-antagonist_1	3	3.95	0.2267	15086-94-9, 79-95-8, 518-47-8	61	73	4870	3.28	1	1	0.46
CTD_CHEMICALS_DISEASES	Hemochromatosis	3	3.95	0.227	72-43-5, 33419-42-0, 2971-36-0	25	97	2583	3.2	1	1	0.4601
CTD_CHEMICALS_PATHWAYS	KEGG:hsa01521|EGFR tyrosine kinase inhibitor resistance	4	5.26	0.2274	33419-42-0, 72-43-5, 68392-35-8, 518-28-5	12	143	939	2.19	1	1	0.4604
MULTICASE_TOX_PREDICTION	RCA fetal weight decrease, mouse	8	10.53	0.2277	117091-64-2, 2624-43-3, 31477-60-8, 569-57-3, 14008-48-1, 68392-35-8, 68047-06-3, 115-33-3	67	554	7882	1.7	1	1	0.4605
HTS_ACTIVE	epigenetic modification:tox21-hdac-p1_hdac-inhibitor_1	8	10.53	0.2306	31127-54-5, 517-28-2, 52479-85-3, 61445-50-9, 1470-79-7, 611-99-4, 131-55-5, 131-54-4	68	454	6512	1.69	1	1	0.4655
TOXPRINT_STRUCTURE	ring:hetero_[6]_Z_1-	15	19.74	0.231	117091-64-2, 29767-20-2, 603-50-9, 31477-60-8, 16423-68-0, 15905-32-5, 517-28-2, 15086-94-9, 139233-53-7, 10040-45-6, 129-16-8, 13473-26-2, 27072-45-3, 518-47-8, 33419-42-0	67	1280	8195	1.43	1	1	0.4655
CTD_CHEMICALS_GOENRICH_CELLCOMP	GO:0031983|vesicle lumen	7	9.21	0.2311	80-05-7, 2971-36-0, 79-94-7, 518-28-5, 72-43-5, 33419-42-0, 68392-35-8	14	335	1103	1.65	1	1	0.4655
TOXCAST_ACTIVE	Tox21_FXR_BLA_agonist_viability	3	3.95	0.2311	1478-61-1, 2971-36-0, 68392-35-8	18	91	1694	3.1	1	1	0.4655
CTD_CHEMICALS_DISEASES	Hodgkin Disease	4	5.26	0.2342	569-57-3, 77-09-8, 129-16-8, 33419-42-0	25	181	2583	2.28	1	1	0.4714
TOXCAST_ACTIVE	APR_HepG2_MitoMass_72h_dn	3	3.95	0.2349	77-09-8, 27955-94-8, 79-94-7	18	92	1694	3.07	1	1	0.4722
CTD_CHEMICALS_DISEASES	Neuroblastoma	6	7.89	0.2361	29767-20-2, 85-60-9, 79-95-8, 80-05-7, 131-55-5, 77-09-8	25	342	2583	1.81	1	1	0.4741
MESH	Benzyl Compounds	2	2.63	0.2365	6559-91-7, 518-28-5	42	35	5355	7.29	1	1	0.4742
TOXPRINT_STRUCTURE	group:carbohydrate_pentopyranose	3	3.95	0.2368	33419-42-0, 29767-20-2, 117091-64-2	67	115	8195	3.19	1	1	0.4742
PHARMACTIONLIST	Contrast Media	2	2.63	0.2368	518-47-8, 2321-07-05	27	28	2720	7.2	1	1	0.4742
LEADSCOPE_TOXICITY	Human Adverse Cardiological Effects: arrhythmia	3	3.95	0.2373	67227-56-9, 1565-94-2, 4162-45-2	66	557	7259	0.59	1	1	0.4747
CTD_CHEMICALS_DISEASES	Premature Birth	2	2.63	0.2378	72-43-5, 79-94-7	25	359	2583	0.58	1	1	0.4751
CTD_CHEMICALS_DISEASES	Squamous Cell Carcinoma of Head and Neck	2	2.63	0.2388	29767-20-2, 143-74-8	25	371	2583	0.56	1	1	0.4763
CTD_CHEMICALS_DISEASES	Pneumonia	2	2.63	0.2391	518-28-5, 1565-94-2	25	346	2583	0.6	1	1	0.4763
CTD_CHEMICALS_DISEASES	Stroke	2	2.63	0.2393	1565-94-2, 67227-56-9	25	374	2583	0.55	1	1	0.4763
MESH	Carbohydrates	3	3.95	0.2396	117091-64-2, 29767-20-2, 33419-42-0	42	122	5355	3.14	1	1	0.4763
MESH	Heterocyclic Compounds, 3-Ring	3	3.95	0.2396	13473-26-2, 518-47-8, 15905-32-5	42	122	5355	3.14	1	1	0.4763
CTD_CHEMICALS_GOENRICH_MOLFUNCT	GO:0003677|DNA binding	8	10.53	0.2402	29767-20-2, 518-28-5, 79-94-7, 2971-36-0, 68392-35-8, 33419-42-0, 79-95-8, 72-43-5	14	383	1090	1.63	1	1	0.4771
TOXPRINT_STRUCTURE	bond:CX_halide_aromatic-X_trihalo_benzene_(1_2_3-)	2	2.63	0.2408	13473-26-2, 71-67-0	67	34	8195	7.19	1	1	0.4774
MULTICASE_TOX_PREDICTION	MCT1 inhibition at 10uM	63	82.89	0.2409	31477-60-8, 131-54-4, 1470-79-7, 41351-30-8, 2971-36-0, 518-28-5, 115-33-3, 14008-48-1, 518-47-8, 85-60-9, 14868-03-2, 68392-35-8, 27072-45-3, 22345-47-7, 33419-42-0, 3236-71-3, 5613-46-7, 29767-20-2, 115-39-9, 77-40-7, 79-94-7, 13473-26-2, 2624-43-3, 10040-45-6, 1943-97-1, 61445-50-9, 1565-94-2, 125-13-3, 52479-85-3, 6559-91-7, 21850-44-2, 27955-94-8, 38103-06-9, 603-50-9, 68047-06-3, 71-67-0, 1…	67	6977	7882	1.06	1	1	0.4774
HTS_STRONGACTIVE	counter screen (cell viability):tox21-ms-p53-p2_viability_1	4	5.26	0.2411	603-50-9, 68047-06-3, 115-39-9, 24038-68-4	61	138	4870	2.31	1	1	0.4774
CTD_CHEMICALS_DISEASES	Edema	2	2.63	0.2414	518-28-5, 30299-08-2	25	382	2583	0.54	1	1	0.4774
CTD_CHEMICALS_GOENRICH_CELLCOMP	GO:0098589|membrane region	7	9.21	0.242	79-94-7, 518-28-5, 2971-36-0, 68392-35-8, 33419-42-0, 72-43-5, 80-05-7	14	344	1103	1.6	1	1	0.4782
CTD_CHEMICALS_GOENRICH_CELLCOMP	GO:0043231|intracellular membrane-bounded organelle	7	9.21	0.2424	67227-56-9, 143-74-8, 79-95-8, 29767-20-2, 72-43-5, 68392-35-8, 2971-36-0	14	709	1103	0.78	1	1	0.4785
PHARMACTIONLIST	Diagnostic Uses of Chemicals	2	2.63	0.2442	2321-07-05, 518-47-8	27	29	2720	6.95	1	1	0.4816
CTD_CHEMICALS_DISEASES	Blood Coagulation Disorders	2	2.63	0.2455	569-57-3, 80-05-7	25	30	2583	6.89	1	1	0.4831
CTD_CHEMICALS_DISEASES	Coloboma	2	2.63	0.2455	79-95-8, 67227-56-9	25	30	2583	6.89	1	1	0.4831
HTS_STRONGACTIVE	development:tox21-sbe-bla-antagonist-p1_sbe-antagonist_1	6	7.89	0.2462	14008-48-1, 131-54-4, 518-28-5, 61445-50-9, 13473-26-2, 68047-06-3	61	257	4870	1.86	1	1	0.4841
CTD_CHEMICALS_DISEASES	Diabetes Mellitus	7	9.21	0.247	77-09-8, 68392-35-8, 79-95-8, 72-43-5, 1565-94-2, 79-94-7, 30299-08-2	25	396	2583	1.83	1	1	0.4847
CTD_CHEMICALS_GOENRICH_CELLCOMP	GO:0098857|membrane microdomain	7	9.21	0.2474	80-05-7, 2971-36-0, 79-94-7, 518-28-5, 72-43-5, 33419-42-0, 68392-35-8	14	348	1103	1.58	1	1	0.4847
HTS_STRONGACTIVE	counter screen (cell viability):tox21-sbe-bla-antagonist-p1_viability_1	4	5.26	0.2477	4221-68-5, 76-60-8, 603-50-9, 85-60-9	61	140	4870	2.28	1	1	0.4847
TOXCAST_ACTIVE	NVS_ENZ_hCK1D	2	2.63	0.2478	131-55-5, 80-05-7	18	28	1694	6.72	1	1	0.4847
TOXCAST_ACTIVE	NVS_ENZ_hSIRT2	2	2.63	0.2478	1478-61-1, 2971-36-0	18	28	1694	6.72	1	1	0.4847
CTD_CHEMICALS_PATHWAYS	REACT:R-HSA-69620|Cell Cycle Checkpoints	3	3.95	0.2485	518-28-5, 33419-42-0, 80-05-7	12	82	939	2.86	1	1	0.4857
CTD_CHEMICALS_GOENRICH_CELLCOMP	GO:0012506|vesicle membrane	5	6.58	0.2524	518-28-5, 79-94-7, 143-74-8, 33419-42-0, 72-43-5	14	187	1103	2.11	1	1	0.4929
CTD_CHEMICALS_GOENRICH_MOLFUNCT	GO:0000976|transcription regulatory region sequence-specific DNA binding	8	10.53	0.2538	29767-20-2, 2971-36-0, 518-28-5, 79-94-7, 33419-42-0, 72-43-5, 79-95-8, 68392-35-8	14	408	1090	1.53	1	1	0.4951
MECHANISM	Modulate gene transcription	3	3.95	0.2562	80-05-7, 31477-60-8, 569-57-3	11	150	1530	2.78	1	1	0.4981
CTD_CHEMICALS_GOENRICH_MOLFUNCT	GO:0004674|protein serine/threonine kinase activity	5	6.58	0.2562	68392-35-8, 33419-42-0, 72-43-5, 518-28-5, 80-05-7	14	188	1090	2.07	1	1	0.4981
CTD_CHEMICALS_GOENRICH_MOLFUNCT	GO:0001067|regulatory region nucleic acid binding	8	10.53	0.2564	2971-36-0, 518-28-5, 79-94-7, 79-95-8, 72-43-5, 33419-42-0, 68392-35-8, 29767-20-2	14	411	1090	1.52	1	1	0.4981
CTD_CHEMICALS_GOENRICH_MOLFUNCT	GO:0044212|transcription regulatory region DNA binding	8	10.53	0.2564	68392-35-8, 72-43-5, 79-95-8, 33419-42-0, 79-94-7, 518-28-5, 2971-36-0, 29767-20-2	14	411	1090	1.52	1	1	0.4981
LEADSCOPE_TOXICITY	Developmental Toxicity: weight dec. rabbit	9	11.84	0.2576	14868-03-2, 29767-20-2, 569-57-3, 31477-60-8, 6559-91-7, 68392-35-8, 33419-42-0, 518-28-5, 68047-06-3	66	611	7259	1.62	1	1	0.4997
TOXPRINT_STRUCTURE	group:carbohydrate_hexopyranose_fructose	3	3.95	0.2577	117091-64-2, 29767-20-2, 33419-42-0	67	122	8195	3.01	1	1	0.4997
HTS_STRONGACTIVE	xenobiotic homeostasis:tox21-ahr-p1_ahr-agonist_1	2	2.63	0.2592	61445-50-9, 131-54-4	61	266	4870	0.6	1	1	0.5017
CTD_CHEMICALS_DISEASES	Respiratory Insufficiency	2	2.63	0.2596	518-28-5, 131-55-5	25	32	2583	6.46	1	1	0.5017
TOXCAST_ACTIVE	ATG_Ahr_CIS_up	5	6.58	0.2597	16423-68-0, 115-39-9, 1478-61-1, 80-05-7, 143-74-8	18	217	1694	2.17	1	1	0.5017
CTD_CHEMICALS_GOENRICH_CELLCOMP	GO:0005654|nucleoplasm	9	11.84	0.2597	2971-36-0, 79-94-7, 518-28-5, 72-43-5, 79-95-8, 33419-42-0, 68392-35-8, 143-74-8, 29767-20-2	14	477	1103	1.49	1	1	0.5017
HTS_STRONGACTIVE	neurotransmission:tox21-ache-p3_ache-inhibitor_1	2	2.63	0.2601	77-09-8, 68047-06-3	61	279	4870	0.57	1	1	0.5019
TOXPRINT_STRUCTURE	group:carbohydrate_aldohexose	3	3.95	0.2607	33419-42-0, 29767-20-2, 117091-64-2	67	123	8195	2.98	1	1	0.5026
CTD_CHEMICALS_DISEASES	Mammary Neoplasms, Animal	7	9.21	0.2613	143-74-8, 131-55-5, 31477-60-8, 67227-56-9, 29767-20-2, 30299-08-2, 79-95-8	25	419	2583	1.73	1	1	0.5026
TOXCAST_ACTIVE	BSK_3C_Eselectin_down	5	6.58	0.2615	79-94-7, 1478-61-1, 2971-36-0, 68392-35-8, 72-43-5	18	219	1694	2.15	1	1	0.5026
CTD_CHEMICALS_DISEASES	Chromosome Aberrations	3	3.95	0.2619	33419-42-0, 129-16-8, 569-57-3	25	107	2583	2.9	1	1	0.5026
CTD_CHEMICALS_GOENRICH_MOLFUNCT	GO:0043565|sequence-specific DNA binding	8	10.53	0.262	29767-20-2, 68392-35-8, 79-95-8, 72-43-5, 33419-42-0, 79-94-7, 518-28-5, 2971-36-0	14	417	1090	1.49	1	1	0.5026
CTD_CHEMICALS_GOENRICH_MOLFUNCT	GO:1990837|sequence-specific double-stranded DNA binding	8	10.53	0.262	29767-20-2, 72-43-5, 79-95-8, 33419-42-0, 68392-35-8, 2971-36-0, 518-28-5, 79-94-7	14	417	1090	1.49	1	1	0.5026
CTD_CHEMICALS_GOENRICH_MOLFUNCT	GO:0046872|metal ion binding	9	11.84	0.2629	67227-56-9, 29767-20-2, 518-28-5, 79-94-7, 2971-36-0, 68392-35-8, 33419-42-0, 72-43-5, 79-95-8	14	480	1090	1.46	1	1	0.5038
HTS_STRONGACTIVE	sex hormone homeostasis:tox21-ar-mda-kb2-luc-agonist-p1_ar-agonist_1	2	2.63	0.2634	14868-03-2, 1470-79-7	61	289	4870	0.55	1	1	0.5044
CTD_CHEMICALS_GOENRICH_MOLFUNCT	GO:0005125|cytokine activity	5	6.58	0.2642	2971-36-0, 79-94-7, 518-28-5, 72-43-5, 33419-42-0	14	194	1090	2.01	1	1	0.5047
CTD_CHEMICALS_GOENRICH_CELLCOMP	GO:0019867|outer membrane	3	3.95	0.2646	80-05-7, 33419-42-0, 518-28-5	14	85	1103	2.78	1	1	0.5047
HTS_STRONGACTIVE	oxidative stress:tox21-are-bla-p1_nrf2-agonist_1	9	11.84	0.2646	6807-17-6, 77-40-7, 2971-36-0, 79-94-7, 843-55-0, 79-95-8, 79-97-0, 1943-97-1, 14868-03-2	61	455	4870	1.58	1	1	0.5047
TOXCAST_ACTIVE	ATG_GLI_CIS_up	3	3.95	0.2654	77-09-8, 79-94-7, 79-95-8	18	100	1694	2.82	1	1	0.5047
TOXCAST_ACTIVE	Tox21_ESRE_BLA_ratio	3	3.95	0.2654	79-94-7, 68392-35-8, 115-39-9	18	100	1694	2.82	1	1	0.5047
TOXCAST_ACTIVE	APR_HepG2_OxidativeStress_24h_up	5	6.58	0.2654	27955-94-8, 80-05-7, 77-40-7, 77-09-8, 79-94-7	18	223	1694	2.11	1	1	0.5047
CTD_CHEMICALS_DISEASES	Genital Diseases, Male	3	3.95	0.2654	80-05-7, 85-60-9, 29767-20-2	25	108	2583	2.87	1	1	0.5047
CTD_CHEMICALS_GOENRICH_MOLFUNCT	GO:0097367|carbohydrate derivative binding	8	10.53	0.2661	143-74-8, 67227-56-9, 79-94-7, 518-28-5, 2971-36-0, 68392-35-8, 72-43-5, 33419-42-0	14	421	1090	1.48	1	1	0.5049
TOXPRINT_STRUCTURE	bond:C=O_carbonyl_generic	32	42.11	0.2664	27072-45-3, 33419-42-0, 29767-20-2, 15905-32-5, 126-00-1, 2624-43-3, 13473-26-2, 129-16-8, 15086-94-9, 125-13-3, 6559-91-7, 52479-85-3, 61445-50-9, 1565-94-2, 38103-06-9, 603-50-9, 131-54-4, 71-67-0, 1470-79-7, 131-55-5, 81-90-3, 77-09-8, 41351-30-8, 611-99-4, 117091-64-2, 16423-68-0, 14008-48-1, 518-28-5, 115-33-3, 518-47-8, 31127-54-5, 30299-08-2	67	4421	8195	0.89	1	1	0.5049
TOXPRINT_STRUCTURE	ring:hetero_[6]_N_pyridine	2	2.63	0.2666	10040-45-6, 603-50-9	67	445	8195	0.55	1	1	0.5049
LEADSCOPE_TOXICITY	Genetic Toxicity: mam. mutation	6	7.89	0.2666	1260-17-9, 34487-61-1, 611-99-4, 52479-85-3, 31127-54-5, 61445-50-9	66	959	7259	0.69	1	1	0.5049
LEADSCOPE_TOXICITY	Human Adverse Urinary Effects: urolithiasis	2	2.63	0.2668	14008-48-1, 1260-17-9	66	402	7259	0.55	1	1	0.5049
MULTICASE_TOX_PREDICTION	NTCP inhibition at 10uM	2	2.63	0.2675	10040-45-6, 71-67-0	67	431	7882	0.55	1	1	0.5058
TOXINS_TARGETS	ESRRG	2	2.63	0.2697	80-05-7, 79-95-8	14	29	1220	6.01	1	1	0.5095
CTD_CHEMICALS_GOENRICH_MOLFUNCT	GO:0005525|GTP binding	2	2.63	0.2707	143-74-8, 80-05-7	14	26	1090	5.99	1	1	0.5099
CTD_CHEMICALS_GOENRICH_MOLFUNCT	GO:0043169|cation binding	9	11.84	0.2707	67227-56-9, 29767-20-2, 518-28-5, 79-94-7, 2971-36-0, 68392-35-8, 72-43-5, 79-95-8, 33419-42-0	14	493	1090	1.42	1	1	0.5099
CTD_CHEMICALS_GOENRICH_CELLCOMP	GO:0044459|plasma membrane part	5	6.58	0.2707	79-94-7, 518-28-5, 68392-35-8, 72-43-5, 33419-42-0	14	526	1103	0.75	1	1	0.5099
CTD_CHEMICALS_GENES	ABCC1	2	2.63	0.2723	29767-20-2, 33419-42-0	22	34	2273	6.08	1	1	0.512
HTS_STRONGACTIVE	counter screen (cell viability):tox21-ppard-bla-agonist-p1_viability_1	9	11.84	0.2723	76-60-8, 4162-45-2, 1565-94-2, 518-28-5, 115-39-9, 68047-06-3, 85-60-9, 1943-97-1, 3236-71-3	61	463	4870	1.55	1	1	0.512
CTD_GOSLIM_BIOPROCESS	GO:0006412|translation	5	6.58	0.2734	80-05-7, 518-28-5, 72-43-5, 33419-42-0, 68392-35-8	16	233	1491	2	1	1	0.5131
CTD_CHEMICALS_DISEASES	Clear-cell metastatic renal cell carcinoma	2	2.63	0.2734	33419-42-0, 72-43-5	25	34	2583	6.08	1	1	0.5131
CTD_GOSLIM_BIOPROCESS	GO:0051604|protein maturation	5	6.58	0.2746	79-94-7, 518-28-5, 80-05-7, 72-43-5, 33419-42-0	16	234	1491	1.99	1	1	0.5148
CTD_CHEMICALS_PATHWAYS	KEGG:hsa05219|Bladder cancer	3	3.95	0.2757	79-94-7, 518-28-5, 33419-42-0	12	88	939	2.67	1	1	0.5164
MESH	Benzazepines	2	2.63	0.2768	22345-47-7, 67227-56-9	42	42	5355	6.07	1	1	0.5179
LEADSCOPE_TOXICITY	Developmental Toxicity: visceral mouse	4	5.26	0.2781	125-13-3, 38103-06-9, 2624-43-3, 603-50-9	66	661	7259	0.67	1	1	0.5197
LEADSCOPE_TOXICITY	Rodent Carcinogenicity: carc mouse	4	5.26	0.2787	21850-44-2, 14868-03-2, 569-57-3, 38103-06-9	66	668	7259	0.66	1	1	0.5204
CTD_CHEMICALS_DISEASES	Lipodystrophy, Familial Partial	3	3.95	0.2795	79-94-7, 68392-35-8, 30299-08-2	25	112	2583	2.77	1	1	0.5211
CTD_CHEMICALS_GOENRICH_MOLFUNCT	GO:0032550|purine ribonucleoside binding	2	2.63	0.2796	143-74-8, 80-05-7	14	27	1090	5.77	1	1	0.5211
CTD_CHEMICALS_DISEASES	LEOPARD Syndrome	2	2.63	0.2803	79-94-7, 68392-35-8	25	35	2583	5.9	1	1	0.5219
TOXCAST_ACTIVE	Tox21_GR_BLA_Antagonist_viability	3	3.95	0.2807	79-94-7, 68392-35-8, 1478-61-1	18	104	1694	2.71	1	1	0.5221
CTD_CHEMICALS_GOENRICH_CELLCOMP	GO:0031968|organelle outer membrane	3	3.95	0.2827	33419-42-0, 80-05-7, 518-28-5	14	89	1103	2.66	1	1	0.5254
CTD_CHEMICALS_GOENRICH_MOLFUNCT	GO:0001085|RNA polymerase II transcription factor binding	3	3.95	0.283	68392-35-8, 518-28-5, 33419-42-0	14	88	1090	2.65	1	1	0.5254
HTS_STRONGACTIVE	counter screen (cell viability):tox21-ar-bla-antagonist-p1_viability_1	10	13.16	0.2841	5613-46-7, 29767-20-2, 85-60-9, 117091-64-2, 68047-06-3, 1565-94-2, 518-28-5, 33419-42-0, 76-60-8, 68392-35-8	61	511	4870	1.56	1	1	0.527
ADVERSE_EFFECT	SKN_Skin Irritation	2	2.63	0.2853	518-28-5, 80-05-7	6	61	941	5.14	1	1	0.5287
TOXINS_TARGETS	ADRA2C	2	2.63	0.2856	2971-36-0, 68047-06-3	14	31	1220	5.62	1	1	0.5288
HTS_STRONGACTIVE	mineral homeostatsis:tox21-vdr-bla-antagonist-p1_vdr-antagonist_1	3	3.95	0.2864	518-28-5, 518-47-8, 14008-48-1	61	86	4870	2.78	1	1	0.5296
CTD_GOSLIM_BIOPROCESS	GO:0048856|anatomical structure development	13	17.11	0.2866	143-74-8, 67227-56-9, 131-55-5, 33419-42-0, 79-95-8, 1565-94-2, 29767-20-2, 80-05-7, 68392-35-8, 72-43-5, 518-28-5, 79-94-7, 2971-36-0	16	978	1491	1.24	1	1	0.5296
CTD_CHEMICALS_PATHWAYS	REACT:R-HSA-168256|Immune System	8	10.53	0.2878	68392-35-8, 72-43-5, 79-94-7, 518-28-5, 2971-36-0, 33419-42-0, 143-74-8, 67227-56-9	12	723	939	0.87	1	1	0.5313
CTD_CHEMICALS_GOENRICH_MOLFUNCT	GO:0003924|GTPase activity	2	2.63	0.2884	80-05-7, 143-74-8	14	28	1090	5.56	1	1	0.5313
CTD_CHEMICALS_GOENRICH_MOLFUNCT	GO:0032549|ribonucleoside binding	2	2.63	0.2884	143-74-8, 80-05-7	14	28	1090	5.56	1	1	0.5313
CTD_CHEMICALS_GOENRICH_MOLFUNCT	GO:0060089|molecular transducer activity	5	6.58	0.2885	2971-36-0, 79-94-7, 79-95-8, 72-43-5, 68392-35-8	14	209	1090	1.86	1	1	0.5313
MODE_CLASS	Receptor Agonist, selective	2	2.63	0.2902	67227-56-9, 30299-08-2	10	55	1476	5.37	1	1	0.5338
CTD_CHEMICALS_DISEASES	Seizures	3	3.95	0.2918	30299-08-2, 2624-43-3, 131-55-5	25	489	2583	0.63	1	1	0.5363
CTD_CHEMICALS_DISEASES	Eye Infections, Bacterial	3	3.95	0.2935	67227-56-9, 1565-94-2, 79-94-7	25	116	2583	2.67	1	1	0.5389
CTD_CHEMICALS_DISEASES	Papillomavirus Infections	2	2.63	0.2938	72-43-5, 1565-94-2	25	37	2583	5.58	1	1	0.5389
TOXCAST_ACTIVE	BSK_3C_ICAM1_down	3	3.95	0.2998	68392-35-8, 79-94-7, 2971-36-0	18	109	1694	2.59	1	1	0.5492
TOXCAST_ACTIVE	NVS_ENZ_hCASP5	2	2.63	0.3	72-43-5, 2971-36-0	18	35	1694	5.38	1	1	0.5492
CTD_CHEMICALS_DISEASES	Glomerulonephritis, IGA	3	3.95	0.3005	67227-56-9, 33419-42-0, 2971-36-0	25	118	2583	2.63	1	1	0.5497
CTD_CHEMICALS_DISEASES	Precancerous Conditions	8	10.53	0.3011	29767-20-2, 77-09-8, 569-57-3, 143-74-8, 16423-68-0, 129-16-8, 1565-94-2, 30299-08-2	25	516	2583	1.6	1	1	0.5502
MULTICASE_TOX_PREDICTION	RCA fetal death, rabbit	5	6.58	0.3015	569-57-3, 2624-43-3, 68047-06-3, 68392-35-8, 14008-48-1	67	284	7882	2.07	1	1	0.5506
CTD_CHEMICALS_GOENRICH_CELLCOMP	GO:0034702|ion channel complex	2	2.63	0.3027	72-43-5, 80-05-7	14	30	1103	5.25	1	1	0.5521
CTD_CHEMICALS_PATHWAYS	KEGG:hsa04917|Prolactin signaling pathway	3	3.95	0.3031	2971-36-0, 72-43-5, 68392-35-8	12	94	939	2.5	1	1	0.5524
CTD_CHEMICALS_GOENRICH_MOLFUNCT	GO:0001883|purine nucleoside binding	2	2.63	0.3057	80-05-7, 143-74-8	14	30	1090	5.19	1	1	0.5551
CTD_CHEMICALS_GOENRICH_MOLFUNCT	GO:0019001|guanyl nucleotide binding	2	2.63	0.3057	143-74-8, 80-05-7	14	30	1090	5.19	1	1	0.5551
CTD_CHEMICALS_GOENRICH_MOLFUNCT	GO:0032561|guanyl ribonucleotide binding	2	2.63	0.3057	143-74-8, 80-05-7	14	30	1090	5.19	1	1	0.5551
TOXPRINT_STRUCTURE	bond:CX_halide_alkenyl-X_acyclic_generic	2	2.63	0.3057	569-57-3, 14868-03-2	67	45	8195	5.44	1	1	0.5551
HTS_STRONGACTIVE	cytotoxicity:tox21-rt-viability-hek293-p1_viability@flor_8h_1	5	6.58	0.3063	15086-94-9, 518-47-8, 16423-68-0, 13473-26-2, 15905-32-5	61	197	4870	2.03	1	1	0.5556
CTD_CHEMICALS_DISEASES	Brain Stem Neoplasms	2	2.63	0.307	72-43-5, 33419-42-0	25	39	2583	5.3	1	1	0.5557
CTD_CHEMICALS_DISEASES	COWDEN SYNDROME 6	2	2.63	0.307	143-74-8, 79-95-8	25	39	2583	5.3	1	1	0.5557
TOXCAST_ACTIVE	NVS_GPCR_hAdrb2	2	2.63	0.3071	2971-36-0, 1478-61-1	18	36	1694	5.23	1	1	0.5557
LEADSCOPE_TOXICITY	Developmental Toxicity: post impl. loss rabbit	8	10.53	0.3085	77-09-8, 517-28-2, 68392-35-8, 68047-06-3, 14868-03-2, 31477-60-8, 603-50-9, 569-57-3	66	1165	7259	0.76	1	1	0.5575
CTD_CHEMICALS_PATHWAYS	REACT:R-HSA-5693532|DNA Double-Strand Break Repair	2	2.63	0.3102	518-28-5, 33419-42-0	12	31	939	5.05	1	1	0.5601
CTD_CHEMICALS_DISEASES	Oligospermia	3	3.95	0.311	79-95-8, 85-60-9, 77-09-8	25	121	2583	2.56	1	1	0.5611
TOXCAST_ACTIVE	Tox21_p53_BLA_p1_viability	3	3.95	0.3113	68392-35-8, 79-94-7, 1478-61-1	18	112	1694	2.52	1	1	0.5611
CTD_CHEMICALS_GENES	FSHB	2	2.63	0.3124	72-43-5, 2971-36-0	22	40	2273	5.17	1	1	0.5626
TOXCAST_ACTIVE	NVS_ADME_rCYP2D1	2	2.63	0.3142	80-05-7, 2971-36-0	18	37	1694	5.09	1	1	0.5654
TOXCAST_ACTIVE	Tox21_p53_BLA_p3_viability	3	3.95	0.3151	79-95-8, 68392-35-8, 79-94-7	18	113	1694	2.5	1	1	0.5665
CTD_CHEMICALS_PATHWAYS	KEGG:hsa04068|FoxO signaling pathway	6	7.89	0.3166	518-28-5, 79-94-7, 2971-36-0, 68392-35-8, 72-43-5, 33419-42-0	12	277	939	1.69	1	1	0.5686
CTD_CHEMICALS_GOENRICH_CELLCOMP	GO:0044456|synapse part	2	2.63	0.3186	72-43-5, 79-94-7	14	251	1103	0.63	1	1	0.5717
TOXCAST_ACTIVE	APR_HepG2_NuclearSize_72h_dn	2	2.63	0.3213	79-94-7, 27955-94-8	18	38	1694	4.95	1	1	0.5756
CTD_CHEMICALS_PATHWAYS	REACT:R-HSA-912526|Interleukin receptor SHC signaling	3	3.95	0.3213	80-05-7, 72-43-5, 68392-35-8	12	98	939	2.4	1	1	0.5756
LEADSCOPE_TOXICITY	Human Adverse Cardiological Effects: rate rhythm	3	3.95	0.3236	67227-56-9, 13473-26-2, 139233-53-7	66	504	7259	0.65	1	1	0.5791
CTD_CHEMICALS_DISEASES	Carcinoma, Adenoid Cystic	3	3.95	0.325	143-74-8, 79-94-7, 29767-20-2	25	125	2583	2.48	1	1	0.581
MULTICASE_TOX_PREDICTION	RCA fetal dysmorphogenesis, rat	3	3.95	0.3261	68047-06-3, 68392-35-8, 31477-60-8	67	550	7882	0.64	1	1	0.5825
CTD_CHEMICALS_DISEASES	Narcolepsy	2	2.63	0.3265	16423-68-0, 131-55-5	25	42	2583	4.92	1	1	0.5826
TOXPRINT_STRUCTURE	bond:CX_halide_alkyl-Cl_trichloro_(1_1_1-)	2	2.63	0.3279	72-43-5, 2971-36-0	67	49	8195	4.99	1	1	0.5847
CTD_CHEMICALS_DISEASES	Cleft Palate	3	3.95	0.3285	29767-20-2, 79-94-7, 77-09-8	25	126	2583	2.46	1	1	0.5847
LEADSCOPE_TOXICITY	Human Adverse Cardiological Effects: myocardial infarct	3	3.95	0.3285	1565-94-2, 67227-56-9, 139233-53-7	66	524	7259	0.63	1	1	0.5847
MESH	Toluene	2	2.63	0.3307	76-60-8, 115-39-9	42	52	5355	4.9	1	1	0.5881
TOXINS_TARGETS	HTR6	2	2.63	0.3313	2971-36-0, 68047-06-3	14	37	1220	4.71	1	1	0.5885
HTS_STRONGACTIVE	apoptosis:tox21-casp3-cho-p1_casp3-activator_1	3	3.95	0.3321	4221-68-5, 24038-68-4, 68047-06-3	61	96	4870	2.49	1	1	0.5896
CTD_CHEMICALS_GENES	CYP17A1	2	2.63	0.3379	131-55-5, 2971-36-0	22	44	2273	4.7	1	1	0.5992
CTD_CHEMICALS_DISEASES	Muscular Dystrophy, Facioscapulohumeral	3	3.95	0.3389	80-05-7, 29767-20-2, 68392-35-8	25	129	2583	2.4	1	1	0.6003
CTD_CHEMICALS_DISEASES	Microcephaly	2	2.63	0.3391	2624-43-3, 80-05-7	25	44	2583	4.7	1	1	0.6003
CTD_CHEMICALS_DISEASES	Autistic Disorder	9	11.84	0.3405	79-95-8, 72-43-5, 1565-94-2, 30299-08-2, 569-57-3, 77-09-8, 67227-56-9, 129-16-8, 16423-68-0	25	634	2583	1.47	1	1	0.6023
CTD_GOSLIM_BIOPROCESS	GO:0051276|chromosome organization	6	7.89	0.3417	79-94-7, 518-28-5, 80-05-7, 68392-35-8, 72-43-5, 33419-42-0	16	326	1491	1.72	1	1	0.6032
TOXCAST_ACTIVE	APR_HepG2_MitoMass_24h_dn	3	3.95	0.3418	77-09-8, 27955-94-8, 80-05-7	18	120	1694	2.35	1	1	0.6032
TOXCAST_ACTIVE	NVS_ADME_hCYP2J2	2	2.63	0.342	80-05-7, 2971-36-0	18	41	1694	4.59	1	1	0.6032
CTD_CHEMICALS_GOENRICH_CELLCOMP	GO:0120038|plasma membrane bounded cell projection part	6	7.89	0.3429	518-28-5, 79-94-7, 143-74-8, 68392-35-8, 33419-42-0, 72-43-5	14	289	1103	1.64	1	1	0.6043
CTD_CHEMICALS_GOENRICH_CELLCOMP	GO:0044463|cell projection part	6	7.89	0.344	79-94-7, 143-74-8, 518-28-5, 68392-35-8, 33419-42-0, 72-43-5	14	290	1103	1.63	1	1	0.6053
CTD_CHEMICALS_PATHWAYS	REACT:R-HSA-512988|Interleukin-3, 5 and GM-CSF signaling	3	3.95	0.3441	68392-35-8, 72-43-5, 80-05-7	12	103	939	2.28	1	1	0.6053
CTD_CHEMICALS_DISEASES	Neuroendocrine Tumors	2	2.63	0.3454	72-43-5, 77-09-8	25	45	2583	4.59	1	1	0.607
CTD_CHEMICALS_DISEASES	Carcinoma, Transitional Cell	5	6.58	0.346	79-95-8, 29767-20-2, 131-55-5, 16423-68-0, 1565-94-2	25	296	2583	1.75	1	1	0.6076
CTD_CHEMICALS_PATHWAYS	REACT:R-HSA-449147|Signaling by Interleukins	6	7.89	0.3469	68392-35-8, 72-43-5, 33419-42-0, 518-28-5, 79-94-7, 2971-36-0	12	588	939	0.8	1	1	0.6086
CTD_CHEMICALS_GOENRICH_MOLFUNCT	GO:0001882|nucleoside binding	2	2.63	0.3473	143-74-8, 80-05-7	14	35	1090	4.45	1	1	0.6088
CTD_CHEMICALS_PATHWAYS	REACT:R-HSA-187687|Signalling to ERKs	3	3.95	0.3486	72-43-5, 80-05-7, 68392-35-8	12	104	939	2.26	1	1	0.61
CTD_CHEMICALS_PATHWAYS	REACT:R-HSA-451927|Interleukin-2 signaling	3	3.95	0.3486	68392-35-8, 72-43-5, 80-05-7	12	104	939	2.26	1	1	0.61
HTS_ACTIVE	cardiac action potential mediation:tox21-herg-u2os-p1_herg-blocker_1	17	22.37	0.3489	131-54-4, 14868-03-2, 2971-36-0, 68047-06-3, 843-55-0, 79-94-7, 518-28-5, 72-43-5, 14008-48-1, 68392-35-8, 518-47-8, 77-09-8, 6807-17-6, 1478-61-1, 79-95-8, 4162-45-2, 79-97-0	68	1252	6512	1.3	1	1	0.61
CTD_CHEMICALS_DISEASES	Fever	2	2.63	0.3497	80-05-7, 1565-94-2	25	305	2583	0.68	1	1	0.6108
CTD_CHEMICALS_DISEASES	Vitiligo	2	2.63	0.3502	68392-35-8, 33419-42-0	25	302	2583	0.68	1	1	0.6108
LEADSCOPE_TOXICITY	Genetic Toxicity: In vitro chrom. ab. CHO	12	15.79	0.3507	1260-17-9, 131-54-4, 29767-20-2, 41351-30-8, 117091-64-2, 611-99-4, 61445-50-9, 31127-54-5, 33419-42-0, 52479-85-3, 131-55-5, 1470-79-7	66	939	7259	1.41	1	1	0.6108
CTD_CHEMICALS_PATHWAYS	KEGG:hsa04913|Ovarian steroidogenesis	2	2.63	0.351	2971-36-0, 72-43-5	12	36	939	4.35	1	1	0.6108
CTD_CHEMICALS_DISEASES	Diabetes Mellitus, Type 1	2	2.63	0.3512	1565-94-2, 30299-08-2	25	327	2583	0.63	1	1	0.6108
CTD_CHEMICALS_DISEASES	Spinocerebellar Ataxias	2	2.63	0.3516	68392-35-8, 79-94-7	25	46	2583	4.49	1	1	0.6108
CTD_CHEMICALS_DISEASES	Drug Eruptions	2	2.63	0.352	72-43-5, 79-95-8	25	330	2583	0.63	1	1	0.6108
CTD_CHEMICALS_DISEASES	Pregnancy Complications, Cardiovascular	2	2.63	0.3526	33419-42-0, 79-94-7	25	332	2583	0.62	1	1	0.6108
CTD_CHEMICALS_DISEASES	Tobacco Use Disorder	2	2.63	0.3526	131-55-5, 72-43-5	25	332	2583	0.62	1	1	0.6108
CTD_CHEMICALS_PATHWAYS	KEGG:hsa04010|MAPK signaling pathway	7	9.21	0.3528	80-05-7, 518-28-5, 79-94-7, 2971-36-0, 68392-35-8, 72-43-5, 33419-42-0	12	363	939	1.51	1	1	0.6108
CTD_CHEMICALS_DISEASES	Dyslipidemias	3	3.95	0.3528	79-95-8, 29767-20-2, 2971-36-0	25	133	2583	2.33	1	1	0.6108
MULTICASE_TOX_PREDICTION	MRP4 inhibition at 50uM	18	23.68	0.3534	16423-68-0, 29767-20-2, 41351-30-8, 117091-64-2, 518-28-5, 14008-48-1, 518-47-8, 10040-45-6, 126-00-1, 30299-08-2, 6559-91-7, 31477-60-8, 68047-06-3, 68392-35-8, 27072-45-3, 81-90-3, 22345-47-7, 33419-42-0	67	2481	7882	0.85	1	1	0.6112
CTD_CHEMICALS_DISEASES	Stomach Ulcer	2	2.63	0.3536	33419-42-0, 30299-08-2	25	335	2583	0.62	1	1	0.6112
CTD_GOSLIM_BIOPROCESS	GO:0034655|nucleobase-containing compound catabolic process	6	7.89	0.3543	518-28-5, 79-94-7, 80-05-7, 68392-35-8, 72-43-5, 33419-42-0	16	341	1491	1.64	1	1	0.6118
CTD_CHEMICALS_PATHWAYS	REACT:R-HSA-2454202|Fc epsilon receptor (FCERI) signaling	7	9.21	0.3555	80-05-7, 68392-35-8, 33419-42-0, 72-43-5, 79-94-7, 518-28-5, 2971-36-0	12	367	939	1.49	1	1	0.6134
CTD_CHEMICALS_GOENRICH_MOLFUNCT	GO:0004672|protein kinase activity	6	7.89	0.356	80-05-7, 518-28-5, 79-94-7, 72-43-5, 33419-42-0, 68392-35-8	14	296	1090	1.58	1	1	0.6136
CTD_CHEMICALS_GENES	STAR	2	2.63	0.3564	80-05-7, 131-55-5	22	47	2273	4.4	1	1	0.6139
TOXCAST_ACTIVE	OT_AR_ARSRC1_0480	3	3.95	0.3569	2971-36-0, 77-40-7, 131-55-5	18	124	1694	2.28	1	1	0.6142
DRUGBANK_TARGETS	NR1I2	2	2.63	0.3573	68392-35-8, 77-09-8	12	49	1249	4.25	1	1	0.6143
CTD_CHEMICALS_DISEASES	Rectal Neoplasms	2	2.63	0.3577	68392-35-8, 77-09-8	25	47	2583	4.4	1	1	0.6145
CTD_CHEMICALS_DISEASES	Polycystic Kidney, Autosomal Dominant	3	3.95	0.3597	30299-08-2, 29767-20-2, 68392-35-8	25	135	2583	2.3	1	1	0.617
CTD_CHEMICALS_GOENRICH_CELLCOMP	GO:0090575|RNA polymerase II transcription factor complex	2	2.63	0.3598	33419-42-0, 518-28-5	14	37	1103	4.26	1	1	0.617
CTD_CHEMICALS_GENES	CASP3	6	7.89	0.3604	80-05-7, 1565-94-2, 518-28-5, 79-94-7, 72-43-5, 33419-42-0	22	359	2273	1.73	1	1	0.6175
CTD_CHEMICALS_PATHWAYS	REACT:R-HSA-2262752|Cellular responses to stress	4	5.26	0.3621	518-28-5, 79-94-7, 33419-42-0, 80-05-7	12	422	939	0.74	1	1	0.6184
CTD_CHEMICALS_PATHWAYS	REACT:R-HSA-1266738|Developmental Biology	8	10.53	0.3621	143-74-8, 79-94-7, 518-28-5, 2971-36-0, 68392-35-8, 72-43-5, 79-95-8, 33419-42-0	12	430	939	1.46	1	1	0.6184
CTD_CHEMICALS_PATHWAYS	REACT:R-HSA-8853659|RET signaling	3	3.95	0.3622	68392-35-8, 80-05-7, 72-43-5	12	107	939	2.19	1	1	0.6184
CTD_CHEMICALS_GOENRICH_CELLCOMP	GO:0005794|Golgi apparatus	6	7.89	0.3622	79-94-7, 518-28-5, 67227-56-9, 2971-36-0, 68392-35-8, 33419-42-0	14	304	1103	1.55	1	1	0.6184
CTD_CHEMICALS_GENES	CASP8	2	2.63	0.3625	33419-42-0, 1565-94-2	22	48	2273	4.3	1	1	0.6184
CTD_CHEMICALS_DISEASES	Ischemic Attack, Transient	3	3.95	0.3631	131-55-5, 518-28-5, 79-94-7	25	136	2583	2.28	1	1	0.6189
ADVERSE_EFFECT	GIS_Diarrhea	4	5.26	0.3668	33419-42-0, 125-13-3, 80-05-7, 603-50-9	6	350	941	1.79	1	1	0.6247
CTD_CHEMICALS_GOENRICH_CELLCOMP	GO:0045121|membrane raft	7	9.21	0.3674	68392-35-8, 33419-42-0, 72-43-5, 518-28-5, 79-94-7, 2971-36-0, 80-05-7	14	350	1103	1.58	1	1	0.6252
CTD_CHEMICALS_GENES	MYC	2	2.63	0.3685	68392-35-8, 29767-20-2	22	49	2273	4.22	1	1	0.6253
LEADSCOPE_TOXICITY	Human Adverse Urinary Effects: nephropathy	4	5.26	0.3688	1260-17-9, 33419-42-0, 117091-64-2, 29767-20-2	66	598	7259	0.74	1	1	0.6253
HTS_STRONGACTIVE	lipid homeostasis:tox21-ppard-bla-agonist-p1_ppard-agonist_1	2	2.63	0.369	68047-06-3, 85-60-9	61	37	4870	4.32	1	1	0.6253
TOXPRINT_STRUCTURE	bond:CX_halide_alkyl-X_generic	4	5.26	0.3693	21850-44-2, 72-43-5, 2971-36-0, 1478-61-1	67	673	8195	0.73	1	1	0.6253
CTD_CHEMICALS_PATHWAYS	REACT:R-HSA-212436|Generic Transcription Pathway	7	9.21	0.3693	29767-20-2, 2971-36-0, 79-94-7, 518-28-5, 79-95-8, 33419-42-0, 68392-35-8	12	382	939	1.43	1	1	0.6253
CTD_CHEMICALS_DISEASES	Leukemia, Myelomonocytic, Juvenile	2	2.63	0.3698	143-74-8, 72-43-5	25	49	2583	4.22	1	1	0.6253
CTD_CHEMICALS_GOENRICH_MOLFUNCT	GO:0005178|integrin binding	3	3.95	0.3701	33419-42-0, 79-94-7, 518-28-5	14	107	1090	2.18	1	1	0.6253
CTD_CHEMICALS_GOENRICH_MOLFUNCT	GO:0016887|ATPase activity	3	3.95	0.3701	33419-42-0, 80-05-7, 518-28-5	14	107	1090	2.18	1	1	0.6253
TOXINS_TARGETS	PPARG	3	3.95	0.371	79-94-7, 79-95-8, 80-05-7	14	120	1220	2.18	1	1	0.6263
CTD_CHEMICALS_GOENRICH_MOLFUNCT	GO:0005126|cytokine receptor binding	6	7.89	0.3723	80-05-7, 2971-36-0, 79-94-7, 518-28-5, 33419-42-0, 72-43-5	14	307	1090	1.52	1	1	0.628
CTD_CHEMICALS_GOENRICH_CELLCOMP	GO:0031984|organelle subcompartment	7	9.21	0.3741	67227-56-9, 518-28-5, 79-94-7, 2971-36-0, 68392-35-8, 33419-42-0, 72-43-5	14	363	1103	1.52	1	1	0.6298
CTD_CHEMICALS_GENES	LHB	2	2.63	0.3745	72-43-5, 80-05-7	22	50	2273	4.13	1	1	0.6298
CTD_CHEMICALS_DISEASES	Prostatic Intraepithelial Neoplasia	6	7.89	0.3748	1565-94-2, 569-57-3, 143-74-8, 16423-68-0, 129-16-8, 85-60-9	25	370	2583	1.68	1	1	0.6298
CTD_CHEMICALS_GOENRICH_MOLFUNCT	GO:0000977|RNA polymerase II regulatory region sequence-specific DNA binding	7	9.21	0.3749	518-28-5, 79-94-7, 2971-36-0, 68392-35-8, 33419-42-0, 79-95-8, 72-43-5	14	360	1090	1.51	1	1	0.6298
CTD_CHEMICALS_GOENRICH_MOLFUNCT	GO:0001012|RNA polymerase II regulatory region DNA binding	7	9.21	0.3749	2971-36-0, 79-94-7, 518-28-5, 79-95-8, 72-43-5, 33419-42-0, 68392-35-8	14	360	1090	1.51	1	1	0.6298
CTD_CHEMICALS_GOENRICH_CELLCOMP	GO:1902495|transmembrane transporter complex	2	2.63	0.3754	72-43-5, 80-05-7	14	39	1103	4.04	1	1	0.63
CTD_CHEMICALS_PATHWAYS	KEGG:hsa05166|HTLV-I infection	7	9.21	0.3763	68392-35-8, 72-43-5, 33419-42-0, 79-94-7, 518-28-5, 2971-36-0, 80-05-7	12	388	939	1.41	1	1	0.631
CTD_CHEMICALS_DISEASES	Myelodysplastic Syndromes	3	3.95	0.3768	33419-42-0, 29767-20-2, 68392-35-8	25	140	2583	2.21	1	1	0.6313
MULTICASE_TOX_PREDICTION	RCA reproductive toxicity in adult males, rat	2	2.63	0.378	517-28-2, 21850-44-2	67	382	7882	0.62	1	1	0.6328
TOXINS_TARGETS	CYP2C18	2	2.63	0.3812	80-05-7, 2971-36-0	14	44	1220	3.96	1	1	0.6371
HTS_ACTIVE	genotoxic stress:tox21-dt40-p1_srf-inducer_1	2	2.63	0.3812	118-82-1, 6807-17-6	68	317	6512	0.6	1	1	0.6371
TOXCAST_ACTIVE	NVS_GPCR_hM5	2	2.63	0.3816	68392-35-8, 1478-61-1	18	47	1694	4	1	1	0.6372
TOXPRINT_STRUCTURE	group:carbohydrate_hexopyranose_generic	3	3.95	0.3821	117091-64-2, 29767-20-2, 33419-42-0	67	164	8195	2.24	1	1	0.6375
CTD_CHEMICALS_DISEASES	Neuralgia	3	3.95	0.3836	29767-20-2, 72-43-5, 131-55-5	25	142	2583	2.18	1	1	0.639
CTD_CHEMICALS_DISEASES	Neoplasm Recurrence, Local	6	7.89	0.3836	2971-36-0, 1565-94-2, 131-55-5, 77-09-8, 29767-20-2, 85-60-9	25	380	2583	1.63	1	1	0.639
CTD_GOSLIM_BIOPROCESS	GO:0061024|membrane organization	7	9.21	0.3862	80-05-7, 2971-36-0, 518-28-5, 79-94-7, 72-43-5, 33419-42-0, 68392-35-8	16	422	1491	1.55	1	1	0.6419
MULTICASE_TOX_PREDICTION	Draize skin test, 24h, rabbit	35	46.05	0.3862	2971-36-0, 117091-64-2, 16423-68-0, 31127-54-5, 76-60-8, 1478-61-1, 67227-56-9, 139233-53-7, 1260-17-9, 68047-06-3, 38103-06-9, 31477-60-8, 79-95-8, 125-31-5, 72-43-5, 15905-32-5, 517-28-2, 115-39-9, 79-94-7, 29767-20-2, 34487-61-1, 5613-46-7, 21850-44-2, 6559-91-7, 52479-85-3, 79-97-0, 118-82-1, 1565-94-2, 10040-45-6, 13473-26-2, 1943-97-1, 15086-94-9, 68392-35-8, 33419-42-0, 143-74-8	67	3615	7882	1.14	1	1	0.6419
CTD_CHEMICALS_GOENRICH_CELLCOMP	GO:0031090|organelle membrane	7	9.21	0.3864	68392-35-8, 72-43-5, 33419-42-0, 518-28-5, 79-94-7, 2971-36-0, 143-74-8	14	378	1103	1.46	1	1	0.6419
TOXCAST_ACTIVE	ATG_PPRE_CIS_up	6	7.89	0.3874	77-09-8, 80-05-7, 131-55-5, 79-94-7, 115-39-9, 1478-61-1	18	366	1694	1.54	1	1	0.6428
CTD_CHEMICALS_DISEASES	Tooth Abnormalities	2	2.63	0.3876	79-95-8, 80-05-7	25	52	2583	3.97	1	1	0.6428
CTD_GOSLIM_BIOPROCESS	GO:0000902|cell morphogenesis	7	9.21	0.3883	79-94-7, 518-28-5, 68392-35-8, 79-95-8, 72-43-5, 33419-42-0, 80-05-7	16	426	1491	1.53	1	1	0.6434
CTD_CHEMICALS_PATHWAYS	KEGG:hsa04110|Cell cycle	4	5.26	0.3903	2971-36-0, 33419-42-0, 518-28-5, 79-94-7	12	145	939	2.16	1	1	0.6461
CTD_CHEMICALS_GOENRICH_CELLCOMP	GO:0044853|plasma membrane raft	2	2.63	0.3905	79-94-7, 72-43-5	14	41	1103	3.84	1	1	0.6461
TOXPRINT_STRUCTURE	atom:element_metal_group_I_II	6	7.89	0.3915	34487-61-1, 10040-45-6, 129-16-8, 16423-68-0, 518-47-8, 71-67-0	67	423	8195	1.73	1	1	0.6471
HTS_STRONGACTIVE	counter screen (cell viability):tox21-mitotox-p1_viability_1	6	7.89	0.392	76-60-8, 6807-17-6, 5613-46-7, 131-55-5, 2971-36-0, 115-39-9	61	279	4870	1.72	1	1	0.6475
CTD_CHEMICALS_GOENRICH_CELLCOMP	GO:0120025|plasma membrane bounded cell projection	7	9.21	0.3926	143-74-8, 68392-35-8, 33419-42-0, 79-95-8, 72-43-5, 518-28-5, 79-94-7	14	384	1103	1.44	1	1	0.6479
CTD_CHEMICALS_GOENRICH_MOLFUNCT	GO:0060589|nucleoside-triphosphatase regulator activity	2	2.63	0.3942	80-05-7, 79-94-7	14	41	1090	3.8	1	1	0.6496
TOXCAST_ACTIVE	NVS_GPCR_hM1	2	2.63	0.3943	1478-61-1, 2971-36-0	18	49	1694	3.84	1	1	0.6496
CTD_CHEMICALS_GOENRICH_CELLCOMP	GO:0030141|secretory granule	8	10.53	0.395	143-74-8, 67227-56-9, 68392-35-8, 72-43-5, 33419-42-0, 79-94-7, 518-28-5, 2971-36-0	14	442	1103	1.43	1	1	0.6502
CTD_CHEMICALS_GOENRICH_CELLCOMP	GO:1990351|transporter complex	2	2.63	0.398	80-05-7, 72-43-5	14	42	1103	3.75	1	1	0.6542
CTD_CHEMICALS_GOENRICH_MOLFUNCT	GO:0003690|double-stranded DNA binding	8	10.53	0.3981	2971-36-0, 518-28-5, 79-94-7, 79-95-8, 72-43-5, 33419-42-0, 68392-35-8, 29767-20-2	14	443	1090	1.41	1	1	0.6542
CTD_CHEMICALS_DISEASES	Renal Insufficiency, Chronic	2	2.63	0.3991	143-74-8, 72-43-5	25	54	2583	3.83	1	1	0.6553
TOXCAST_ACTIVE	NVS_ADME_rCYP2C13	2	2.63	0.4006	2971-36-0, 80-05-7	18	50	1694	3.76	1	1	0.6572
CTD_CHEMICALS_GOENRICH_CELLCOMP	GO:0005634|nucleus	9	11.84	0.4028	68392-35-8, 79-95-8, 72-43-5, 33419-42-0, 79-94-7, 518-28-5, 2971-36-0, 29767-20-2, 143-74-8	14	515	1103	1.38	1	1	0.6604
CTD_CHEMICALS_GOENRICH_MOLFUNCT	GO:0016491|oxidoreductase activity	5	6.58	0.4035	2971-36-0, 79-94-7, 518-28-5, 33419-42-0, 72-43-5	14	492	1090	0.79	1	1	0.6609
CTD_CHEMICALS_GOENRICH_CELLCOMP	GO:0044433|cytoplasmic vesicle part	8	10.53	0.4045	68392-35-8, 72-43-5, 33419-42-0, 518-28-5, 79-94-7, 2971-36-0, 143-74-8, 67227-56-9	14	458	1103	1.38	1	1	0.662
CTD_CHEMICALS_GOENRICH_CELLCOMP	GO:0099503|secretory vesicle	8	10.53	0.4053	518-28-5, 79-94-7, 2971-36-0, 68392-35-8, 33419-42-0, 72-43-5, 143-74-8, 67227-56-9	14	459	1103	1.37	1	1	0.6628
TOXCAST_ACTIVE	NVS_ADME_rCYP2A1	2	2.63	0.4068	2971-36-0, 80-05-7	18	51	1694	3.69	1	1	0.664
TOXCAST_ACTIVE	NVS_ADME_rCYP2C6	2	2.63	0.4068	2971-36-0, 72-43-5	18	51	1694	3.69	1	1	0.664
TOXINS_TARGETS	SELE	2	2.63	0.4081	80-05-7, 2971-36-0	14	48	1220	3.63	1	1	0.6657
CTD_CHEMICALS_DISEASES	Arthritis, Rheumatoid	3	3.95	0.409	16423-68-0, 143-74-8, 30299-08-2	25	429	2583	0.72	1	1	0.6666
TOXPRINT_STRUCTURE	bond:CX_halide_aromatic-Cl_trihalo_benzene_(1_2_4-)	2	2.63	0.41	13473-26-2, 71-67-0	67	65	8195	3.76	1	1	0.6672
CTD_CHEMICALS_DISEASES	Pulmonary Fibrosis	3	3.95	0.41	30299-08-2, 518-28-5, 67227-56-9	25	437	2583	0.71	1	1	0.6672
CTD_CHEMICALS_GENES	MAPK1	4	5.26	0.4116	80-05-7, 79-94-7, 72-43-5, 68392-35-8	22	189	2273	2.19	1	1	0.6691
CTD_CHEMICALS_GOENRICH_MOLFUNCT	GO:0098772|molecular function regulator	6	7.89	0.4136	72-43-5, 33419-42-0, 68392-35-8, 2971-36-0, 79-94-7, 518-28-5	14	555	1090	0.84	1	1	0.6718
CTD_GOSLIM_BIOPROCESS	GO:0022618|ribonucleoprotein complex assembly	2	2.63	0.4144	80-05-7, 68392-35-8	16	52	1491	3.58	1	1	0.6725
TOXINS_TARGETS	DRD1	2	2.63	0.4147	68047-06-3, 2971-36-0	14	49	1220	3.56	1	1	0.6725
CTD_CHEMICALS_DISEASES	Hyperlipoproteinemias	2	2.63	0.4161	29767-20-2, 30299-08-2	25	57	2583	3.63	1	1	0.6733
CTD_CHEMICALS_DISEASES	Paratuberculosis	2	2.63	0.4161	72-43-5, 131-55-5	25	57	2583	3.63	1	1	0.6733
MULTICASE_TOX_PREDICTION	OATP2B1substrates	15	19.74	0.4162	34487-61-1, 117091-64-2, 41351-30-8, 29767-20-2, 518-28-5, 115-39-9, 10040-45-6, 126-00-1, 6559-91-7, 76-60-8, 71-67-0, 143-74-8, 22345-47-7, 125-31-5, 33419-42-0	67	1378	7882	1.28	1	1	0.6733
CTD_CHEMICALS_DISEASES	Melanoma	7	9.21	0.4167	518-28-5, 1565-94-2, 2971-36-0, 30299-08-2, 79-95-8, 67227-56-9, 16423-68-0	25	459	2583	1.58	1	1	0.6735
LEADSCOPE_TOXICITY	Developmental Toxicity: fetal death rabbit	10	13.16	0.4178	68392-35-8, 68047-06-3, 518-28-5, 14868-03-2, 31477-60-8, 569-57-3, 4162-45-2, 6559-91-7, 22345-47-7, 2624-43-3	66	779	7259	1.41	1	1	0.6748
CTD_GOSLIM_BIOPROCESS	GO:0000278|mitotic cell cycle	8	10.53	0.4183	143-74-8, 80-05-7, 518-28-5, 79-94-7, 2971-36-0, 68392-35-8, 33419-42-0, 72-43-5	16	528	1491	1.41	1	1	0.675
HTS_STRONGACTIVE	cytotoxicity:tox21-rt-viability-hepg2-p1_viability@glo_40h_1	6	7.89	0.4211	68392-35-8, 15905-32-5, 85-60-9, 4221-68-5, 1565-94-2, 518-47-8	61	303	4870	1.58	1	1	0.679
MULTICASE_TOX_PREDICTION	BSEP inhibition at 10uM	15	19.74	0.4219	52479-85-3, 21850-44-2, 4162-45-2, 31127-54-5, 2624-43-3, 15905-32-5, 16423-68-0, 611-99-4, 41351-30-8, 22345-47-7, 68047-06-3, 68392-35-8, 569-57-3, 131-54-4, 25327-89-3	67	1398	7882	1.26	1	1	0.6798
TOXPRINT_STRUCTURE	chain:alkaneCyclic_ethyl_C2_(connect_noZ)	10	13.16	0.423	1943-97-1, 2624-43-3, 6559-91-7, 30299-08-2, 117091-64-2, 29767-20-2, 518-28-5, 33419-42-0, 31477-60-8, 843-55-0	67	1484	8195	0.82	1	1	0.6809
CTD_GOSLIM_BIOPROCESS	GO:0140014|mitotic nuclear division	4	5.26	0.4236	518-28-5, 80-05-7, 68392-35-8, 33419-42-0	16	189	1491	1.97	1	1	0.6814
TOXCAST_ACTIVE	NVS_GPCR_hAdrb1	2	2.63	0.425	80-05-7, 1478-61-1	18	54	1694	3.49	1	1	0.6823
CTD_CHEMICALS_DISEASES	Nephrotic Syndrome	4	5.26	0.4251	569-57-3, 67227-56-9, 80-05-7, 29767-20-2	25	199	2583	2.08	1	1	0.6823
TOXCAST_ACTIVE	Tox21_ARE_BLA_agonist_ratio	7	9.21	0.4252	80-05-7, 27955-94-8, 79-95-8, 79-94-7, 2971-36-0, 1478-61-1, 77-40-7	18	463	1694	1.42	1	1	0.6823
PRODUCT_CLASS	Gastrointestinal System	2	2.63	0.4271	603-50-9, 125-13-3	13	71	1571	3.4	1	1	0.6847
CTD_GOSLIM_BIOPROCESS	GO:0009056|catabolic process	8	10.53	0.4292	1565-94-2, 33419-42-0, 80-05-7, 79-94-7, 518-28-5, 2971-36-0, 68392-35-8, 72-43-5	16	883	1491	0.84	1	1	0.6876
TOXCAST_ACTIVE	NVS_IC_rCaBTZCHL	2	2.63	0.431	68392-35-8, 80-05-7	18	55	1694	3.42	1	1	0.6898
TOXINS_TARGETS	CYP3A5	2	2.63	0.434	2971-36-0, 80-05-7	14	52	1220	3.35	1	1	0.6926
TOXCAST_ACTIVE	APR_HepG2_p53Act_72h_up	4	5.26	0.4341	72-43-5, 27955-94-8, 79-94-7, 77-09-8	18	195	1694	1.93	1	1	0.6926
TOXCAST_ACTIVE	Tox21_PPARd_BLA_Agonist_viability	4	5.26	0.4341	68392-35-8, 2971-36-0, 1478-61-1, 16423-68-0	18	195	1694	1.93	1	1	0.6926
CTD_GOSLIM_BIOPROCESS	GO:0016192|vesicle-mediated transport	9	11.84	0.4345	79-94-7, 518-28-5, 2971-36-0, 68392-35-8, 72-43-5, 33419-42-0, 143-74-8, 67227-56-9, 80-05-7	16	626	1491	1.34	1	1	0.6926
CTD_GOSLIM_BIOPROCESS	GO:0006629|lipid metabolic process	12	15.79	0.435	131-55-5, 77-09-8, 79-95-8, 33419-42-0, 30299-08-2, 29767-20-2, 80-05-7, 72-43-5, 68392-35-8, 2971-36-0, 518-28-5, 79-94-7	16	929	1491	1.2	1	1	0.6926
CTD_GOSLIM_BIOPROCESS	GO:0030154|cell differentiation	12	15.79	0.435	143-74-8, 67227-56-9, 33419-42-0, 79-95-8, 1565-94-2, 29767-20-2, 80-05-7, 68392-35-8, 72-43-5, 518-28-5, 79-94-7, 2971-36-0	16	929	1491	1.2	1	1	0.6926
LEADSCOPE_TOXICITY	Developmental Toxicity: fetal death mouse	6	7.89	0.4355	518-28-5, 29767-20-2, 117091-64-2, 33419-42-0, 6559-91-7, 143-74-8	66	840	7259	0.79	1	1	0.6926
LEADSCOPE_TOXICITY	Developmental Toxicity: fetal death rat	6	7.89	0.4355	31477-60-8, 518-28-5, 68047-06-3, 68392-35-8, 125-31-5, 6559-91-7	66	841	7259	0.78	1	1	0.6926
TOXPRINT_STRUCTURE	group:ligand_path_4_bidentate_aminoethanol	3	3.95	0.437	31477-60-8, 68047-06-3, 68392-35-8	67	497	8195	0.74	1	1	0.694
TOXCAST_ACTIVE	APR_HepG2_MitoticArrest_24h_up	4	5.26	0.4371	79-94-7, 77-09-8, 77-40-7, 27955-94-8	18	197	1694	1.91	1	1	0.694
KNOWN_TOXICITY	Hepatotoxicity	2	2.63	0.4389	125-13-3, 33419-42-0	3	170	678	2.66	1	1	0.6963
ADVERSE_EFFECT	IMU_Allergic Reactions	2	2.63	0.4406	518-47-8, 33419-42-0	6	103	941	3.05	1	1	0.6985
HTS_STRONGACTIVE	cytotoxicity:tox21-rt-viability-hek293-p1_viability@glo_8h_1	11	14.47	0.4413	1565-94-2, 4221-68-5, 620-92-8, 68047-06-3, 79-97-0, 68392-35-8, 517-28-2, 139233-53-7, 13080-86-9, 24038-68-4, 85-60-9	61	645	4870	1.36	1	1	0.699
CTD_CHEMICALS_GENES	CAT	4	5.26	0.442	1565-94-2, 79-94-7, 30299-08-2, 80-05-7	22	215	2273	1.92	1	1	0.6995
TOXCAST_ACTIVE	NVS_ADME_rCYP2A2	2	2.63	0.4427	2971-36-0, 80-05-7	18	57	1694	3.3	1	1	0.7001
CTD_CHEMICALS_DISEASES	Essential Hypertension	2	2.63	0.4433	29767-20-2, 72-43-5	25	62	2583	3.33	1	1	0.7005
CTD_CHEMICALS_GOENRICH_MOLFUNCT	GO:0015077|monovalent inorganic cation transmembrane transporter activity	2	2.63	0.445	72-43-5, 80-05-7	14	48	1090	3.24	1	1	0.7022
CTD_GOSLIM_BIOPROCESS	GO:0000003|reproduction	10	13.16	0.4455	79-94-7, 518-28-5, 2971-36-0, 68392-35-8, 72-43-5, 80-05-7, 29767-20-2, 1565-94-2, 33419-42-0, 79-95-8	16	733	1491	1.27	1	1	0.7022
CTD_CHEMICALS_GOENRICH_MOLFUNCT	GO:0031406|carboxylic acid binding	4	5.26	0.4455	33419-42-0, 80-05-7, 79-94-7, 518-28-5	14	173	1090	1.8	1	1	0.7022
MULTICASE_TOX_PREDICTION	RCA reproductive toxicity in adult males, rodent	7	9.21	0.4466	14868-03-2, 2624-43-3, 569-57-3, 517-28-2, 21850-44-2, 68392-35-8, 68047-06-3	67	517	7882	1.59	1	1	0.7026
HTS_STRONGACTIVE	counter screen (cell viability):tox21-fxr-bla-agonist-p2_viability_1	7	9.21	0.4466	68047-06-3, 843-55-0, 4162-45-2, 76-60-8, 1943-97-1, 603-50-9, 85-60-9	61	355	4870	1.57	1	1	0.7026
CTD_CHEMICALS_DISEASES	Metabolic Diseases	4	5.26	0.4468	68392-35-8, 79-95-8, 30299-08-2, 131-55-5	25	216	2583	1.91	1	1	0.7026
CTD_CHEMICALS_PATHWAYS	REACT:R-HSA-69481|G2/M Checkpoints	2	2.63	0.4472	33419-42-0, 518-28-5	12	49	939	3.19	1	1	0.7027
TOXCAST_ACTIVE	NVS_NR_hFXR_Antagonist	2	2.63	0.4485	1478-61-1, 80-05-7	18	58	1694	3.25	1	1	0.7042
HTS_STRONGACTIVE	counter screen (cell viability):tox21-pr-bla-antagonist-p1_viability_1	7	9.21	0.4493	68047-06-3, 1565-94-2, 4221-68-5, 76-60-8, 1943-97-1, 85-60-9, 24038-68-4	61	359	4870	1.56	1	1	0.7049
CTD_CHEMICALS_DISEASES	Neoplasms	4	5.26	0.4516	72-43-5, 1565-94-2, 30299-08-2, 16423-68-0	25	554	2583	0.75	1	1	0.7077
CTD_CHEMICALS_PATHWAYS	KEGG:hsa05169|Epstein-Barr virus infection	4	5.26	0.4519	79-94-7, 518-28-5, 33419-42-0, 68392-35-8	12	181	939	1.73	1	1	0.7077
CTD_CHEMICALS_DISEASES	Colorectal Neoplasms	4	5.26	0.4526	143-74-8, 16423-68-0, 67227-56-9, 68392-35-8	25	558	2583	0.74	1	1	0.7077
HTS_ACTIVE	mineral homeostatsis:tox21-vdr-bla-agonist-p1_vdr-agonist_1	2	2.63	0.4526	3236-71-3, 68392-35-8	68	58	6512	3.3	1	1	0.7077
CTD_CHEMICALS_DISEASES	Necrosis	8	10.53	0.4533	33419-42-0, 76-60-8, 30299-08-2, 1565-94-2, 518-28-5, 129-16-8, 569-57-3, 77-09-8	25	561	2583	1.47	1	1	0.7084
MULTICASE_TOX_PREDICTION	Sensory irritation, mouse	33	43.42	0.4548	25327-89-3, 22345-47-7, 143-74-8, 27072-45-3, 517-28-2, 15905-32-5, 115-39-9, 34487-61-1, 3236-71-3, 79-97-0, 52479-85-3, 125-13-3, 61445-50-9, 15086-94-9, 1943-97-1, 71-67-0, 131-54-4, 38103-06-9, 31477-60-8, 125-31-5, 1470-79-7, 77-09-8, 81-90-3, 131-55-5, 14008-48-1, 115-33-3, 41351-30-8, 16423-68-0, 76-60-8, 31127-54-5, 85-60-9, 139233-53-7, 518-47-8	67	3423	7882	1.13	1	1	0.7098
CTD_CHEMICALS_GOENRICH_MOLFUNCT	GO:0016462|pyrophosphatase activity	4	5.26	0.456	518-28-5, 143-74-8, 72-43-5, 33419-42-0	14	178	1090	1.75	1	1	0.7098
CTD_CHEMICALS_GOENRICH_MOLFUNCT	GO:0016817|hydrolase activity, acting on acid anhydrides	4	5.26	0.456	518-28-5, 143-74-8, 33419-42-0, 72-43-5	14	178	1090	1.75	1	1	0.7098
CTD_CHEMICALS_GOENRICH_MOLFUNCT	GO:0016818|hydrolase activity, acting on acid anhydrides, in phosphorus-containing anhydrides	4	5.26	0.456	143-74-8, 518-28-5, 72-43-5, 33419-42-0	14	178	1090	1.75	1	1	0.7098
CTD_CHEMICALS_GOENRICH_MOLFUNCT	GO:0017111|nucleoside-triphosphatase activity	4	5.26	0.456	143-74-8, 518-28-5, 72-43-5, 33419-42-0	14	178	1090	1.75	1	1	0.7098
HTS_STRONGACTIVE	counter screen (cell viability):tox21-vdr-bla-antagonist-p1_viability_1	7	9.21	0.4571	85-60-9, 3236-71-3, 1943-97-1, 4162-45-2, 68047-06-3, 6807-17-6, 1565-94-2	61	369	4870	1.51	1	1	0.7109
CTD_CHEMICALS_GOENRICH_MOLFUNCT	GO:0043177|organic acid binding	4	5.26	0.4582	80-05-7, 518-28-5, 79-94-7, 33419-42-0	14	179	1090	1.74	1	1	0.712
MULTICASE_TOX_PREDICTION	Extent of human metabolism, %	36	47.37	0.4594	16423-68-0, 41351-30-8, 115-33-3, 14008-48-1, 518-47-8, 139233-53-7, 31127-54-5, 76-60-8, 38103-06-9, 31477-60-8, 131-54-4, 603-50-9, 71-67-0, 68047-06-3, 81-90-3, 131-55-5, 77-09-8, 1470-79-7, 125-31-5, 3236-71-3, 34487-61-1, 115-39-9, 15905-32-5, 517-28-2, 2624-43-3, 15086-94-9, 126-00-1, 61445-50-9, 1565-94-2, 125-13-3, 79-97-0, 52479-85-3, 68392-35-8, 27072-45-3, 143-74-8, 22345-47-7	67	3798	7882	1.12	1	1	0.7133
TOXCAST_ACTIVE	NVS_GPCR_gH2	2	2.63	0.4599	68392-35-8, 77-40-7	18	60	1694	3.14	1	1	0.7133
TOXPRINT_STRUCTURE	bond:CX_halide_alkyl-X_dihalo_(1_3)	2	2.63	0.4607	1478-61-1, 16423-68-0	67	76	8195	3.22	1	1	0.7133
CTD_CHEMICALS_PATHWAYS	KEGG:hsa04020|Calcium signaling pathway	2	2.63	0.4608	72-43-5, 80-05-7	12	51	939	3.07	1	1	0.7133
CTD_CHEMICALS_PATHWAYS	KEGG:hsa04215|Apoptosis - multiple species	2	2.63	0.4608	518-28-5, 33419-42-0	12	51	939	3.07	1	1	0.7133
TOXCAST_ACTIVE	ATG_Sp1_CIS_up	4	5.26	0.4616	77-09-8, 79-94-7, 1478-61-1, 77-40-7	18	212	1694	1.78	1	1	0.714
MULTICASE_TOX_PREDICTION	RCA survival pre-implantation, mouse	4	5.26	0.4633	68047-06-3, 31477-60-8, 68392-35-8, 14008-48-1	67	247	7882	1.91	1	1	0.716
TOXINS_TARGETS	ALPL	2	2.63	0.4648	129-16-8, 27072-45-3	14	57	1220	3.06	1	1	0.7173
DRUGBANK_ENZYMES	CYP3A5	2	2.63	0.4649	29767-20-2, 33419-42-0	4	149	793	2.66	1	1	0.7173
CTD_CHEMICALS_GOENRICH_MOLFUNCT	GO:0016829|lyase activity	2	2.63	0.4655	518-28-5, 33419-42-0	14	51	1090	3.05	1	1	0.7178
HTS_STRONGACTIVE	counter screen (cell viability):tox21-cre-antagonist-p1_viability_1	4	5.26	0.4665	4221-68-5, 603-50-9, 24038-68-4, 85-60-9	61	170	4870	1.88	1	1	0.7186
CTD_CHEMICALS_DISEASES	Parkinson Disease	8	10.53	0.468	16423-68-0, 129-16-8, 569-57-3, 77-09-8, 2971-36-0, 518-28-5, 1565-94-2, 68392-35-8	25	595	2583	1.39	1	1	0.7204
CTD_CHEMICALS_DISEASES	Leydig Cell Tumor	2	2.63	0.4693	2971-36-0, 72-43-5	25	67	2583	3.08	1	1	0.7219
TOXCAST_ACTIVE	NVS_MP_rPBR	4	5.26	0.4705	80-05-7, 2971-36-0, 1478-61-1, 68392-35-8	18	217	1694	1.73	1	1	0.7229
TOXCAST_ACTIVE	NVS_GPCR_hAdoRA2a	2	2.63	0.4711	1478-61-1, 68392-35-8	18	62	1694	3.04	1	1	0.7229
TOXCAST_ACTIVE	NVS_GPCR_hM2	2	2.63	0.4711	2971-36-0, 1478-61-1	18	62	1694	3.04	1	1	0.7229
HTS_STRONGACTIVE	counter screen (cell viability):tox21-sbe-bla-agonist-p1_viability_1	4	5.26	0.4742	569-57-3, 603-50-9, 24038-68-4, 85-60-9	61	174	4870	1.84	1	1	0.7272
CTD_CHEMICALS_PATHWAYS	KEGG:hsa04620|Toll-like receptor signaling pathway	2	2.63	0.4753	79-94-7, 68392-35-8	12	196	939	0.8	1	1	0.7282
CTD_CHEMICALS_GOENRICH_CELLCOMP	GO:0045177|apical part of cell	4	5.26	0.4756	518-28-5, 79-94-7, 80-05-7, 33419-42-0	14	189	1103	1.67	1	1	0.7282
TOXCAST_ACTIVE	NVS_ADME_rCYP2C11	2	2.63	0.4766	2971-36-0, 80-05-7	18	63	1694	2.99	1	1	0.7287
CTD_CHEMICALS_DISEASES	Osteoporosis, Postmenopausal	4	5.26	0.4771	2971-36-0, 30299-08-2, 72-43-5, 33419-42-0	25	236	2583	1.75	1	1	0.7287
CTD_CHEMICALS_PATHWAYS	REACT:R-HSA-5683057|MAPK family signaling cascades	4	5.26	0.4771	79-94-7, 80-05-7, 68392-35-8, 72-43-5	12	192	939	1.63	1	1	0.7287
MULTICASE_TOX_PREDICTION	RCA fetal weight decrease, rabbit	2	2.63	0.4783	68047-06-3, 68392-35-8	67	77	7882	3.06	1	1	0.73
CTD_CHEMICALS_DISEASES	Neoplasm Invasiveness	5	6.58	0.4792	131-55-5, 77-09-8, 85-60-9, 30299-08-2, 79-95-8	25	627	2583	0.82	1	1	0.7309
HTS_STRONGACTIVE	counter screen (cell viability):tox21-vdr-bla-agonist-p1_viability_1	7	9.21	0.4798	85-60-9, 3236-71-3, 16423-68-0, 1943-97-1, 68392-35-8, 68047-06-3, 1565-94-2	61	392	4870	1.43	1	1	0.7311
CTD_CHEMICALS_PATHWAYS	KEGG:hsa05214|Glioma	2	2.63	0.4806	518-28-5, 72-43-5	12	54	939	2.9	1	1	0.7311
CTD_CHEMICALS_PATHWAYS	REACT:R-HSA-109606|Intrinsic Pathway for Apoptosis	2	2.63	0.4806	33419-42-0, 518-28-5	12	54	939	2.9	1	1	0.7311
CTD_CHEMICALS_PATHWAYS	KEGG:hsa05215|Prostate cancer	5	6.58	0.4808	33419-42-0, 72-43-5, 68392-35-8, 518-28-5, 79-94-7	12	234	939	1.67	1	1	0.7311
CTD_CHEMICALS_GOENRICH_MOLFUNCT	GO:0015075|ion transmembrane transporter activity	2	2.63	0.4815	79-94-7, 72-43-5	14	206	1090	0.76	1	1	0.7315
TOXCAST_ACTIVE	NVS_GPCR_hTXA2	2	2.63	0.4821	77-09-8, 80-05-7	18	64	1694	2.94	1	1	0.7318
TOXINS_TARGETS	CYP2B6	2	2.63	0.4826	80-05-7, 72-43-5	14	223	1220	0.78	1	1	0.732
CTD_CHEMICALS_GOENRICH_MOLFUNCT	GO:0038023|signaling receptor activity	4	5.26	0.4831	68392-35-8, 79-95-8, 72-43-5, 79-94-7	14	190	1090	1.64	1	1	0.7323
TOXPRINT_STRUCTURE	chain:alkaneCyclic_hexyl_C6	4	5.26	0.4839	843-55-0, 30299-08-2, 1943-97-1, 2624-43-3	67	616	8195	0.79	1	1	0.7329
MULTICASE_TOX_PREDICTION	RCA survival post-implantation, rabbit	2	2.63	0.4871	68047-06-3, 68392-35-8	67	79	7882	2.98	1	1	0.7367
CTD_CHEMICALS_GOENRICH_CELLCOMP	GO:0005740|mitochondrial envelope	2	2.63	0.4873	518-28-5, 33419-42-0	14	228	1103	0.69	1	1	0.7367
CTD_CHEMICALS_PATHWAYS	REACT:R-HSA-4420097|VEGFA-VEGFR2 Pathway	5	6.58	0.4875	80-05-7, 518-28-5, 72-43-5, 33419-42-0, 68392-35-8	12	242	939	1.62	1	1	0.7367
CTD_GOSLIM_BIOPROCESS	GO:0042254|ribosome biogenesis	2	2.63	0.4892	68392-35-8, 80-05-7	16	65	1491	2.87	1	1	0.7383
CTD_CHEMICALS_DISEASES	Adrenal Hyperplasia, Congenital	2	2.63	0.4893	77-09-8, 131-55-5	25	71	2583	2.91	1	1	0.7383
CTD_CHEMICALS_PATHWAYS	REACT:R-HSA-3700989|Transcriptional Regulation by TP53	5	6.58	0.4905	80-05-7, 518-28-5, 79-94-7, 33419-42-0, 68392-35-8	12	245	939	1.6	1	1	0.7394
CTD_CHEMICALS_PATHWAYS	REACT:R-HSA-194138|Signaling by VEGF	5	6.58	0.4915	518-28-5, 80-05-7, 68392-35-8, 33419-42-0, 72-43-5	12	246	939	1.59	1	1	0.7404
CTD_CHEMICALS_PATHWAYS	REACT:R-HSA-211859|Biological oxidations	5	6.58	0.4925	518-28-5, 79-94-7, 80-05-7, 33419-42-0, 72-43-5	12	247	939	1.58	1	1	0.7414
CTD_CHEMICALS_DISEASES	Stomach Neoplasms	9	11.84	0.4929	77-09-8, 143-74-8, 129-16-8, 33419-42-0, 30299-08-2, 29767-20-2, 569-57-3, 68392-35-8, 72-43-5	25	701	2583	1.33	1	1	0.7414
CTD_CHEMICALS_DISEASES	Brain Neoplasms	4	5.26	0.4953	16423-68-0, 2971-36-0, 143-74-8, 68392-35-8	25	247	2583	1.67	1	1	0.7445
TOXCAST_ACTIVE	ATG_BRE_CIS_up	2	2.63	0.4965	80-05-7, 1478-61-1	18	261	1694	0.72	1	1	0.7457
CTD_CHEMICALS_GOENRICH_CELLCOMP	GO:0044430|cytoskeletal part	5	6.58	0.4979	518-28-5, 79-94-7, 143-74-8, 33419-42-0, 68392-35-8	14	242	1103	1.63	1	1	0.7472
TOXPRINT_STRUCTURE	bond:CX_halide_aromatic-X_dihalo_benzene_(1_4-)	2	2.63	0.4989	13473-26-2, 71-67-0	67	85	8195	2.88	1	1	0.7481
MULTICASE_TOX_PREDICTION	Dendritic cell activation at 100uM (CD86, CD54)	23	30.26	0.4998	131-54-4, 38103-06-9, 25327-89-3, 131-55-5, 1470-79-7, 33419-42-0, 79-95-8, 5613-46-7, 80-05-7, 16423-68-0, 117091-64-2, 29767-20-2, 79-94-7, 518-28-5, 115-39-9, 139233-53-7, 118-82-1, 1565-94-2, 61445-50-9, 21850-44-2, 6559-91-7, 52479-85-3, 4162-45-2	67	2329	7882	1.16	1	1	0.7486
MULTICASE_TOX_PREDICTION	BSEP substrates	9	11.84	0.5001	21850-44-2, 1565-94-2, 518-47-8, 81-90-3, 77-09-8, 1943-97-1, 15086-94-9, 15905-32-5, 16423-68-0	67	1268	7882	0.83	1	1	0.7486
CTD_CHEMICALS_DISEASES	Papilloma	4	5.26	0.5005	2971-36-0, 79-94-7, 518-28-5, 29767-20-2	25	250	2583	1.65	1	1	0.7486
HTS_STRONGACTIVE	xenobiotic homeostasis:tox21-p450-1a2-p1_1a2-inhibitor_1	20	26.32	0.5012	517-28-2, 72-43-5, 620-92-8, 34487-61-1, 16423-68-0, 5613-46-7, 52479-85-3, 79-97-0, 76-60-8, 4162-45-2, 61445-50-9, 85-60-9, 13473-26-2, 1260-17-9, 24038-68-4, 14868-03-2, 131-54-4, 1470-79-7, 143-74-8, 131-55-5	61	1769	4870	0.9	1	1	0.7486
TOXCAST_ACTIVE	ATG_CRE_CIS_up	5	6.58	0.5018	27955-94-8, 79-94-7, 77-09-8, 80-05-7, 1478-61-1	18	273	1694	1.72	1	1	0.7486
CTD_CHEMICALS_DISEASES	Adenocarcinoma of Lung	4	5.26	0.5022	29767-20-2, 80-05-7, 77-09-8, 143-74-8	25	251	2583	1.65	1	1	0.7486
MESH	Indoles	2	2.63	0.5022	115-33-3, 125-13-3	42	90	5355	2.83	1	1	0.7486
CTD_CHEMICALS_GENES	VEGFA	2	2.63	0.5025	16423-68-0, 68392-35-8	22	74	2273	2.79	1	1	0.7486
TOXCAST_ACTIVE	NVS_ADME_hCYP19A1	2	2.63	0.5033	131-55-5, 1478-61-1	18	68	1694	2.77	1	1	0.7486
PHARMACTIONLIST	Hormone Antagonists	2	2.63	0.5038	68047-06-3, 68392-35-8	27	72	2720	2.8	1	1	0.7486
CTD_CHEMICALS_DISEASES	Heart Valve Diseases	2	2.63	0.5044	518-28-5, 72-43-5	25	262	2583	0.79	1	1	0.7486
CTD_CHEMICALS_DISEASES	Hemolytic-Uremic Syndrome	2	2.63	0.5045	33419-42-0, 80-05-7	25	261	2583	0.79	1	1	0.7486
CTD_CHEMICALS_DISEASES	Acute Lung Injury	2	2.63	0.5047	72-43-5, 79-94-7	25	258	2583	0.8	1	1	0.7486
CTD_CHEMICALS_DISEASES	Cardiotoxicity	2	2.63	0.5047	33419-42-0, 1565-94-2	25	258	2583	0.8	1	1	0.7486
CTD_CHEMICALS_DISEASES	Epilepsy	2	2.63	0.5049	68392-35-8, 16423-68-0	25	256	2583	0.81	1	1	0.7486
CTD_CHEMICALS_PATHWAYS	REACT:R-HSA-422475|Axon guidance	5	6.58	0.5056	72-43-5, 33419-42-0, 68392-35-8, 518-28-5, 79-94-7	12	258	939	1.52	1	1	0.7486
CTD_CHEMICALS_PATHWAYS	REACT:R-HSA-166054|Activated TLR4 signalling	2	2.63	0.506	79-94-7, 68392-35-8	12	58	939	2.7	1	1	0.7486
CTD_CHEMICALS_DISEASES	Splenomegaly	2	2.63	0.5061	518-28-5, 131-55-5	25	278	2583	0.74	1	1	0.7486
CTD_CHEMICALS_DISEASES	Head and Neck Neoplasms	2	2.63	0.5068	77-09-8, 79-94-7	25	281	2583	0.74	1	1	0.7492
CTD_CHEMICALS_DISEASES	Diabetic Neuropathies	2	2.63	0.5074	1565-94-2, 30299-08-2	25	283	2583	0.73	1	1	0.7495
CTD_CHEMICALS_DISEASES	Hyperinsulinism	2	2.63	0.5088	79-94-7, 1565-94-2	25	287	2583	0.72	1	1	0.751
CTD_CHEMICALS_DISEASES	Behcet Syndrome	2	2.63	0.5092	131-55-5, 30299-08-2	25	288	2583	0.72	1	1	0.751
CTD_CHEMICALS_DISEASES	Glioblastoma	2	2.63	0.5108	67227-56-9, 2971-36-0	25	292	2583	0.71	1	1	0.7526
CTD_CHEMICALS_PATHWAYS	KEGG:hsa04066|HIF-1 signaling pathway	5	6.58	0.511	518-28-5, 79-94-7, 72-43-5, 33419-42-0, 68392-35-8	12	262	939	1.49	1	1	0.7526
CTD_CHEMICALS_DISEASES	Acute Coronary Syndrome	2	2.63	0.5122	569-57-3, 129-16-8	25	295	2583	0.7	1	1	0.7526
CTD_GOSLIM_BIOPROCESS	GO:0006913|nucleocytoplasmic transport	5	6.58	0.5124	68392-35-8, 33419-42-0, 518-28-5, 79-94-7, 80-05-7	16	293	1491	1.59	1	1	0.7526
CTD_CHEMICALS_DISEASES	Muscular Atrophy	2	2.63	0.5132	143-74-8, 72-43-5	25	297	2583	0.7	1	1	0.7526
PHARMACTIONLIST	Hormones	2	2.63	0.5135	569-57-3, 80-05-7	27	74	2720	2.72	1	1	0.7526
TOXCAST_ACTIVE	ATG_TAL_CIS_up	2	2.63	0.5137	77-09-8, 79-94-7	18	70	1694	2.69	1	1	0.7526
TOXCAST_ACTIVE	NVS_ADME_hCYP1A1	2	2.63	0.5137	2971-36-0, 80-05-7	18	70	1694	2.69	1	1	0.7526
TOXCAST_ACTIVE	NVS_GPCR_hM4	2	2.63	0.5137	1260-17-9, 1478-61-1	18	70	1694	2.69	1	1	0.7526
LEADSCOPE_TOXICITY	Genetic Toxicity: UDS	8	10.53	0.5141	131-55-5, 1470-79-7, 611-99-4, 61445-50-9, 1260-17-9, 115-39-9, 31127-54-5, 52479-85-3	66	645	7259	1.36	1	1	0.7527
TOXPRINT_STRUCTURE	ring:hetero_[5]_N_pyrrolidone_(2-)	2	2.63	0.515	115-33-3, 125-13-3	67	89	8195	2.75	1	1	0.7528
MULTICASE_TOX_PREDICTION	BCRP substrates	26	34.21	0.5153	1470-79-7, 131-55-5, 27072-45-3, 33419-42-0, 22345-47-7, 25327-89-3, 31477-60-8, 126-00-1, 15086-94-9, 518-47-8, 13473-26-2, 21850-44-2, 6559-91-7, 125-13-3, 4162-45-2, 1565-94-2, 61445-50-9, 117091-64-2, 41351-30-8, 29767-20-2, 16423-68-0, 15905-32-5, 14008-48-1, 517-28-2, 115-33-3, 518-28-5	67	2678	7882	1.14	1	1	0.7528
CTD_CHEMICALS_DISEASES	Hernia, Diaphragmatic	5	6.58	0.5154	67227-56-9, 131-55-5, 2971-36-0, 68392-35-8, 79-95-8	25	301	2583	1.72	1	1	0.7528
MULTICASE_TOX_PREDICTION	RCA reproductive toxicity in females, rat	2	2.63	0.5167	68392-35-8, 68047-06-3	67	86	7882	2.74	1	1	0.7542
CTD_CHEMICALS_GOENRICH_MOLFUNCT	GO:0031625|ubiquitin protein ligase binding	5	6.58	0.5182	518-28-5, 79-94-7, 80-05-7, 68392-35-8, 33419-42-0	14	257	1090	1.51	1	1	0.7558
CTD_CHEMICALS_GOENRICH_CELLCOMP	GO:0032279|asymmetric synapse	2	2.63	0.5187	72-43-5, 80-05-7	14	60	1103	2.63	1	1	0.7558
LEADSCOPE_TOXICITY	Developmental Toxicity: pre impl. loss rabbit	5	6.58	0.5193	2624-43-3, 569-57-3, 14868-03-2, 68047-06-3, 68392-35-8	66	670	7259	0.82	1	1	0.7558
MULTICASE_TOX_PREDICTION	RCA newborn behavioral toxicity, rodent	2	2.63	0.5197	2971-36-0, 72-43-5	67	294	7882	0.8	1	1	0.7558
TOXPRINT_STRUCTURE	ring:hetero_[5]_Z_1_3-Z	5	6.58	0.5197	117091-64-2, 29767-20-2, 518-28-5, 6559-91-7, 33419-42-0	67	740	8195	0.83	1	1	0.7558
THERAPEUTIC_CLASS	Antineoplastics	2	2.63	0.522	29767-20-2, 33419-42-0	11	103	1452	2.56	1	1	0.7574
CTD_CHEMICALS_DISEASES	Cecal Neoplasms	2	2.63	0.5225	143-74-8, 16423-68-0	25	78	2583	2.65	1	1	0.7574
CTD_CHEMICALS_DISEASES	Lithiasis	2	2.63	0.5225	79-95-8, 29767-20-2	25	78	2583	2.65	1	1	0.7574
CTD_CHEMICALS_DISEASES	Obesity, Morbid	2	2.63	0.5225	79-94-7, 80-05-7	25	78	2583	2.65	1	1	0.7574
LEADSCOPE_TOXICITY	Developmental Toxicity: structural mouse	5	6.58	0.5227	34487-61-1, 569-57-3, 13473-26-2, 129-16-8, 143-74-8	66	698	7259	0.79	1	1	0.7574
CTD_CHEMICALS_GOENRICH_CELLCOMP	GO:0099572|postsynaptic specialization	2	2.63	0.5247	80-05-7, 72-43-5	14	61	1103	2.58	1	1	0.7597
HTS_STRONGACTIVE	epigenetic modification:tox21-hdac-p1_hdac-inhibitor_1	2	2.63	0.5263	131-54-4, 61445-50-9	61	224	4870	0.71	1	1	0.7615
HTS_STRONGACTIVE	energy homeostasis:tox21-pgc-err-p1_pgc-err-antagonist_1	2	2.63	0.527	1565-94-2, 569-57-3	61	225	4870	0.71	1	1	0.7619
MULTICASE_TOX_PREDICTION	Haptenation (DPRA, SH test)	30	39.47	0.5277	85-60-9, 139233-53-7, 67227-56-9, 31127-54-5, 41351-30-8, 16423-68-0, 115-33-3, 1470-79-7, 131-55-5, 79-95-8, 603-50-9, 131-54-4, 38103-06-9, 1260-17-9, 2624-43-3, 21850-44-2, 6559-91-7, 52479-85-3, 79-97-0, 1565-94-2, 118-82-1, 61445-50-9, 29767-20-2, 5613-46-7, 517-28-2, 79-94-7, 27072-45-3, 33419-42-0, 22345-47-7, 25327-89-3	67	3122	7882	1.13	1	1	0.7624
MULTICASE_TOX_PREDICTION	Local lymph node assay, mouse, extreme sensitizers (EC3 < 1%)	11	14.47	0.5285	517-28-2, 61445-50-9, 31127-54-5, 52479-85-3, 13473-26-2, 67227-56-9, 139233-53-7, 1260-17-9, 569-57-3, 14868-03-2, 27072-45-3	67	1489	7882	0.87	1	1	0.7629
MULTICASE_TOX_PREDICTION	RCA fetal growth retardation, mouse	2	2.63	0.5323	2624-43-3, 3236-71-3	67	339	7882	0.69	1	1	0.7679
CTD_CHEMICALS_DISEASES	Astrocytoma	5	6.58	0.5332	85-60-9, 33419-42-0, 131-55-5, 79-94-7, 77-09-8	25	326	2583	1.58	1	1	0.7687
HTS_STRONGACTIVE	counter screen (cell viability):tox21-hse-bla-p1_viability_1	5	6.58	0.5337	1565-94-2, 3236-71-3, 5613-46-7, 4162-45-2, 85-60-9	61	234	4870	1.71	1	1	0.7687
CTD_CHEMICALS_GOENRICH_MOLFUNCT	GO:0022857|transmembrane transporter activity	3	3.95	0.535	79-94-7, 33419-42-0, 72-43-5	14	275	1090	0.85	1	1	0.7701
TOXPRINT_STRUCTURE	bond:C(=O)O_carboxylicEster_alkyl	9	11.84	0.5393	14008-48-1, 115-33-3, 518-28-5, 29767-20-2, 117091-64-2, 603-50-9, 33419-42-0, 6559-91-7, 2624-43-3	67	830	8195	1.33	1	1	0.7754
CTD_CHEMICALS_DISEASES	Silicosis	5	6.58	0.5395	68392-35-8, 79-94-7, 16423-68-0, 2971-36-0, 131-55-5	25	333	2583	1.55	1	1	0.7754
CTD_CHEMICALS_PATHWAYS	REACT:R-HSA-166520|Signalling by NGF	7	9.21	0.5403	68392-35-8, 72-43-5, 33419-42-0, 79-94-7, 518-28-5, 2971-36-0, 80-05-7	12	391	939	1.4	1	1	0.7758
CTD_CHEMICALS_DISEASES	Amino Acid Metabolism, Inborn Errors	2	2.63	0.5406	72-43-5, 79-94-7	25	82	2583	2.52	1	1	0.7758
CTD_CHEMICALS_GOENRICH_CELLCOMP	GO:0043005|neuron projection	6	7.89	0.5412	79-94-7, 143-74-8, 518-28-5, 33419-42-0, 72-43-5, 68392-35-8	14	324	1103	1.46	1	1	0.7758
CTD_CHEMICALS_DISEASES	Brain Injuries	5	6.58	0.5413	143-74-8, 518-28-5, 569-57-3, 67227-56-9, 16423-68-0	25	335	2583	1.54	1	1	0.7758
CTD_CHEMICALS_GOENRICH_MOLFUNCT	GO:0048018|receptor ligand activity	6	7.89	0.5417	79-94-7, 518-28-5, 80-05-7, 2971-36-0, 33419-42-0, 72-43-5	14	321	1090	1.46	1	1	0.7758
TOXINS_TARGETS	VCAM1	2	2.63	0.5432	2971-36-0, 80-05-7	14	71	1220	2.45	1	1	0.7772
TOXCAST_ACTIVE	Tox21_FXR_BLA_agonist_ratio	2	2.63	0.5435	77-09-8, 27955-94-8	18	76	1694	2.48	1	1	0.7772
CTD_CHEMICALS_DISEASES	Pulmonary Embolism	2	2.63	0.545	143-74-8, 30299-08-2	25	83	2583	2.49	1	1	0.7788
LEADSCOPE_TOXICITY	Developmental Toxicity: pre impl. loss mouse	9	11.84	0.5454	33419-42-0, 143-74-8, 518-28-5, 68047-06-3, 68392-35-8, 517-28-2, 117091-64-2, 34487-61-1, 14868-03-2	66	760	7259	1.3	1	1	0.7788
TOXPRINT_STRUCTURE	chain:alkeneCyclic_diene_cyclohexene	5	6.58	0.5467	117091-64-2, 29767-20-2, 518-28-5, 6559-91-7, 33419-42-0	67	377	8195	1.62	1	1	0.7801
CTD_CHEMICALS_GENES	PARP1	2	2.63	0.5481	518-28-5, 33419-42-0	22	84	2273	2.46	1	1	0.7809
CTD_CHEMICALS_GOENRICH_MOLFUNCT	GO:0030545|receptor regulator activity	6	7.89	0.5484	2971-36-0, 80-05-7, 518-28-5, 79-94-7, 33419-42-0, 72-43-5	14	330	1090	1.42	1	1	0.7809
CTD_CHEMICALS_GOENRICH_CELLCOMP	GO:0043227|membrane-bounded organelle	9	11.84	0.5485	72-43-5, 68392-35-8, 2971-36-0, 29767-20-2, 16423-68-0, 79-95-8, 1565-94-2, 67227-56-9, 143-74-8	14	769	1103	0.92	1	1	0.7809
CTD_CHEMICALS_DISEASES	Hypertriglyceridemia	2	2.63	0.5494	30299-08-2, 29767-20-2	25	84	2583	2.46	1	1	0.7816
CTD_GOSLIM_BIOPROCESS	GO:0019748|secondary metabolic process	6	7.89	0.55	33419-42-0, 72-43-5, 518-28-5, 79-94-7, 80-05-7, 77-09-8	16	378	1491	1.48	1	1	0.782
CTD_CHEMICALS_DISEASES	Keratosis	5	6.58	0.5532	131-55-5, 143-74-8, 30299-08-2, 79-94-7, 1565-94-2	25	347	2583	1.49	1	1	0.786
CTD_CHEMICALS_GOENRICH_MOLFUNCT	GO:0051087|chaperone binding	2	2.63	0.5581	518-28-5, 33419-42-0	14	66	1090	2.36	1	1	0.7923
CTD_CHEMICALS_PATHWAYS	KEGG:hsa01100|Metabolic pathways	5	6.58	0.5593	2971-36-0, 518-28-5, 79-94-7, 72-43-5, 33419-42-0	12	434	939	0.9	1	1	0.7935
CTD_CHEMICALS_GENES	TNF	3	3.95	0.5597	1565-94-2, 79-94-7, 80-05-7	22	389	2273	0.8	1	1	0.7935
CTD_CHEMICALS_GOENRICH_CELLCOMP	GO:0043226|organelle	9	11.84	0.5606	16423-68-0, 29767-20-2, 2971-36-0, 72-43-5, 68392-35-8, 67227-56-9, 143-74-8, 1565-94-2, 79-95-8	14	756	1103	0.94	1	1	0.7939
CTD_CHEMICALS_DISEASES	Amphetamine-Related Disorders	5	6.58	0.5618	79-94-7, 129-16-8, 67227-56-9, 569-57-3, 143-74-8	25	355	2583	1.46	1	1	0.7939
HTS_STRONGACTIVE	counter screen (cell viability):tox21-erb-bla-p1_viability_1	10	13.16	0.5619	85-60-9, 24038-68-4, 5613-46-7, 13080-86-9, 1943-97-1, 4162-45-2, 68392-35-8, 76-60-8, 68047-06-3, 4221-68-5	61	625	4870	1.28	1	1	0.7939
CTD_CHEMICALS_GOENRICH_CELLCOMP	GO:0009986|cell surface	7	9.21	0.562	67227-56-9, 72-43-5, 33419-42-0, 68392-35-8, 2971-36-0, 79-94-7, 518-28-5	14	396	1103	1.39	1	1	0.7939
HTS_STRONGACTIVE	counter screen (cell viability):tox21-fxr-bla-antagonist-p1_viability_1	5	6.58	0.5621	68047-06-3, 3236-71-3, 603-50-9, 1565-94-2, 85-60-9	61	261	4870	1.53	1	1	0.7939
LEADSCOPE_TOXICITY	Human Adverse Cardiological Effects: tachycardia	10	13.16	0.5628	22345-47-7, 1565-94-2, 67227-56-9, 129-16-8, 13473-26-2, 518-47-8, 15086-94-9, 1260-17-9, 15905-32-5, 16423-68-0	66	856	7259	1.28	1	1	0.7939
CTD_CHEMICALS_DISEASES	Osteoarthritis	3	3.95	0.5636	2624-43-3, 77-09-8, 30299-08-2	25	369	2583	0.84	1	1	0.7939
CTD_CHEMICALS_DISEASES	Esophageal Squamous Cell Carcinoma	3	3.95	0.5639	16423-68-0, 67227-56-9, 129-16-8	25	365	2583	0.85	1	1	0.7939
CTD_CHEMICALS_DISEASES	Carcinoma, Squamous Cell	3	3.95	0.5644	1565-94-2, 16423-68-0, 143-74-8	25	361	2583	0.86	1	1	0.7939
CTD_CHEMICALS_DISEASES	Diabetic Nephropathies	3	3.95	0.5648	16423-68-0, 67227-56-9, 30299-08-2	25	358	2583	0.87	1	1	0.7939
CTD_CHEMICALS_GOENRICH_MOLFUNCT	GO:0016787|hydrolase activity	6	7.89	0.565	518-28-5, 79-94-7, 68392-35-8, 72-43-5, 33419-42-0, 143-74-8	14	347	1090	1.35	1	1	0.7939
CTD_CHEMICALS_GOENRICH_MOLFUNCT	GO:0017076|purine nucleotide binding	6	7.89	0.565	143-74-8, 518-28-5, 79-94-7, 33419-42-0, 72-43-5, 68392-35-8	14	347	1090	1.35	1	1	0.7939
CTD_GOSLIM_BIOPROCESS	GO:0006950|response to stress	11	14.47	0.5652	16423-68-0, 80-05-7, 2971-36-0, 518-28-5, 79-94-7, 72-43-5, 68392-35-8, 67227-56-9, 143-74-8, 1565-94-2, 33419-42-0	16	1089	1491	0.94	1	1	0.7939
CTD_CHEMICALS_GOENRICH_MOLFUNCT	GO:0035639|purine ribonucleoside triphosphate binding	6	7.89	0.5661	518-28-5, 79-94-7, 68392-35-8, 72-43-5, 33419-42-0, 143-74-8	14	348	1090	1.34	1	1	0.7941
CTD_CHEMICALS_DISEASES	Liver Cirrhosis, Alcoholic	3	3.95	0.5662	67227-56-9, 1565-94-2, 30299-08-2	25	395	2583	0.78	1	1	0.7941
CTD_CHEMICALS_DISEASES	Ovarian Neoplasms	3	3.95	0.5672	2971-36-0, 77-09-8, 2624-43-3	25	399	2583	0.78	1	1	0.795
CTD_GOSLIM_BIOPROCESS	GO:0050877|nervous system process	6	7.89	0.5684	80-05-7, 518-28-5, 79-94-7, 79-95-8, 72-43-5, 33419-42-0	16	406	1491	1.38	1	1	0.7961
CTD_CHEMICALS_PATHWAYS	REACT:R-HSA-211897|Cytochrome P450 - arranged by substrate type	2	2.63	0.5701	68392-35-8, 72-43-5	12	69	939	2.27	1	1	0.7973
CTD_CHEMICALS_DISEASES	Endometrial Neoplasms	6	7.89	0.5706	143-74-8, 31477-60-8, 16423-68-0, 85-60-9, 1565-94-2, 79-95-8	25	409	2583	1.52	1	1	0.7973
LEADSCOPE_TOXICITY	Rodent Carcinogenicity: carc mouse female	7	9.21	0.5706	68392-35-8, 68047-06-3, 14868-03-2, 31477-60-8, 38103-06-9, 569-57-3, 21850-44-2	66	902	7259	0.85	1	1	0.7973
CTD_GOSLIM_BIOPROCESS	GO:0007005|mitochondrion organization	6	7.89	0.571	518-28-5, 79-94-7, 68392-35-8, 33419-42-0, 72-43-5, 80-05-7	16	409	1491	1.37	1	1	0.7973
CTD_CHEMICALS_GOENRICH_MOLFUNCT	GO:0042802|identical protein binding	8	10.53	0.5713	79-94-7, 518-28-5, 2971-36-0, 68392-35-8, 79-95-8, 72-43-5, 33419-42-0, 67227-56-9	14	679	1090	0.92	1	1	0.7973
CTD_CHEMICALS_DISEASES	Carcinoma, Non-Small-Cell Lung	6	7.89	0.5718	33419-42-0, 2971-36-0, 29767-20-2, 77-09-8, 569-57-3, 129-16-8	25	412	2583	1.5	1	1	0.7974
CTD_CHEMICALS_GOENRICH_MOLFUNCT	GO:0000166|nucleotide binding	7	9.21	0.574	143-74-8, 68392-35-8, 72-43-5, 33419-42-0, 518-28-5, 79-94-7, 2971-36-0	14	415	1090	1.31	1	1	0.7993
CTD_CHEMICALS_GOENRICH_MOLFUNCT	GO:1901265|nucleoside phosphate binding	7	9.21	0.574	143-74-8, 79-94-7, 518-28-5, 2971-36-0, 68392-35-8, 72-43-5, 33419-42-0	14	415	1090	1.31	1	1	0.7993
CTD_CHEMICALS_DISEASES	Thyroid cancer, follicular	2	2.63	0.5747	72-43-5, 30299-08-2	25	90	2583	2.3	1	1	0.7994
CTD_CHEMICALS_GOENRICH_MOLFUNCT	GO:0046914|transition metal ion binding	8	10.53	0.575	68392-35-8, 33419-42-0, 72-43-5, 79-95-8, 79-94-7, 518-28-5, 2971-36-0, 29767-20-2	14	470	1090	1.33	1	1	0.7994
CTD_CHEMICALS_GOENRICH_MOLFUNCT	GO:1901363|heterocyclic compound binding	10	13.16	0.5752	79-94-7, 518-28-5, 2971-36-0, 68392-35-8, 79-95-8, 72-43-5, 33419-42-0, 143-74-8, 131-55-5, 29767-20-2	14	640	1090	1.22	1	1	0.7994
CTD_CHEMICALS_GOENRICH_CELLCOMP	GO:0043235|receptor complex	2	2.63	0.5756	79-94-7, 72-43-5	14	70	1103	2.25	1	1	0.7994
HTS_STRONGACTIVE	autofluorescence:tox21-spec-hek293-p1_autofluor@med-blue-n_1	5	6.58	0.5765	15905-32-5, 517-28-2, 129-16-8, 61445-50-9, 15086-94-9	61	272	4870	1.47	1	1	0.7994
CTD_CHEMICALS_DISEASES	Glioma	6	7.89	0.5769	29767-20-2, 569-57-3, 16423-68-0, 67227-56-9, 129-16-8, 80-05-7	25	423	2583	1.47	1	1	0.7994
MESH	Acids, Acyclic	3	3.95	0.577	10040-45-6, 30299-08-2, 1565-94-2	42	452	5355	0.85	1	1	0.7994
CTD_CHEMICALS_GOENRICH_MOLFUNCT	GO:0048037|cofactor binding	5	6.58	0.5776	33419-42-0, 72-43-5, 79-94-7, 518-28-5, 80-05-7	14	441	1090	0.88	1	1	0.7994
CTD_CHEMICALS_GENES	ABCB1	2	2.63	0.5776	16423-68-0, 33419-42-0	22	91	2273	2.27	1	1	0.7994
CTD_CHEMICALS_DISEASES	Coumarin Resistance	2	2.63	0.5788	72-43-5, 68392-35-8	25	91	2583	2.27	1	1	0.8005
HTS_STRONGACTIVE	cytotoxicity:tox21-rt-viability-hepg2-p1_viability@glo_16h_1	5	6.58	0.5793	518-47-8, 1565-94-2, 4221-68-5, 85-60-9, 68392-35-8	61	274	4870	1.46	1	1	0.8005
CTD_CHEMICALS_GOENRICH_MOLFUNCT	GO:0043167|ion binding	10	13.16	0.5805	29767-20-2, 67227-56-9, 143-74-8, 33419-42-0, 72-43-5, 79-95-8, 68392-35-8, 2971-36-0, 79-94-7, 518-28-5	14	656	1090	1.19	1	1	0.8012
TOXCAST_ACTIVE	ATG_TGFb_CIS_up	2	2.63	0.5805	16423-68-0, 79-94-7	18	84	1694	2.24	1	1	0.8012
CTD_CHEMICALS_DISEASES	Mesothelioma, Malignant	6	7.89	0.5819	143-74-8, 80-05-7, 67227-56-9, 2624-43-3, 29767-20-2, 518-28-5	25	432	2583	1.44	1	1	0.802
CTD_CHEMICALS_GOENRICH_MOLFUNCT	GO:0097159|organic cyclic compound binding	10	13.16	0.582	72-43-5, 79-95-8, 33419-42-0, 68392-35-8, 2971-36-0, 518-28-5, 79-94-7, 29767-20-2, 131-55-5, 143-74-8	14	659	1090	1.18	1	1	0.802
CTD_CHEMICALS_GOENRICH_MOLFUNCT	GO:0044877|protein-containing complex binding	8	10.53	0.5828	79-94-7, 518-28-5, 2971-36-0, 68392-35-8, 33419-42-0, 72-43-5, 143-74-8, 67227-56-9	14	492	1090	1.27	1	1	0.8026
TOXPRINT_STRUCTURE	ring:hetero_[5]_N_pyrrole_generic	3	3.95	0.5847	125-13-3, 115-33-3, 31477-60-8	67	447	8195	0.82	1	1	0.8044
TOXCAST_ACTIVE	BSK_CASM3C_MIG_down	2	2.63	0.585	27955-94-8, 79-94-7	18	85	1694	2.21	1	1	0.8044
CTD_CHEMICALS_GOENRICH_MOLFUNCT	GO:0004888|transmembrane signaling receptor activity	2	2.63	0.5855	79-94-7, 72-43-5	14	71	1090	2.19	1	1	0.8045
CTD_CHEMICALS_PATHWAYS	KEGG:hsa00140|Steroid hormone biosynthesis	2	2.63	0.5862	79-94-7, 72-43-5	12	72	939	2.17	1	1	0.8045
CTD_CHEMICALS_GOENRICH_CELLCOMP	GO:0005819|spindle	2	2.63	0.5863	68392-35-8, 80-05-7	14	72	1103	2.19	1	1	0.8045
MESH	Cycloparaffins	2	2.63	0.5875	843-55-0, 27072-45-3	42	114	5355	2.24	1	1	0.8057
CTD_CHEMICALS_DISEASES	Carcinoma	6	7.89	0.5888	79-95-8, 85-60-9, 77-09-8, 67227-56-9, 31477-60-8, 131-55-5	25	443	2583	1.4	1	1	0.8069
MESH	Hydrocarbons, Alicyclic	2	2.63	0.5908	27072-45-3, 843-55-0	42	115	5355	2.22	1	1	0.8084
CTD_CHEMICALS_DISEASES	Heart Failure, Diastolic	2	2.63	0.5909	33419-42-0, 79-95-8	25	94	2583	2.2	1	1	0.8084
CTD_CHEMICALS_GOENRICH_CELLCOMP	GO:0032991|protein-containing complex	7	9.21	0.5912	143-74-8, 2971-36-0, 79-94-7, 518-28-5, 72-43-5, 33419-42-0, 68392-35-8	14	592	1103	0.93	1	1	0.8084
TOXINS_TARGETS	GABRG2	2	2.63	0.5925	22345-47-7, 129-16-8	14	81	1220	2.15	1	1	0.8097
CTD_GOSLIM_BIOPROCESS	GO:0044403|symbiont process	8	10.53	0.593	68392-35-8, 72-43-5, 33419-42-0, 518-28-5, 79-94-7, 2971-36-0, 143-74-8, 80-05-7	16	559	1491	1.33	1	1	0.8099
TOXCAST_ACTIVE	BSK_CASM3C_TissueFactor_down	2	2.63	0.5937	68392-35-8, 79-94-7	18	87	1694	2.16	1	1	0.8099
CTD_GOSLIM_BIOPROCESS	GO:0042592|homeostatic process	9	11.84	0.5939	33419-42-0, 1565-94-2, 68392-35-8, 72-43-5, 518-28-5, 79-94-7, 2971-36-0, 29767-20-2, 80-05-7	16	927	1491	0.9	1	1	0.8099
CTD_CHEMICALS_DISEASES	Lymphomatoid Papulosis	2	2.63	0.5948	79-94-7, 67227-56-9	25	95	2583	2.18	1	1	0.8106
TOXINS_TARGETS	GABRB3	2	2.63	0.5971	22345-47-7, 129-16-8	14	82	1220	2.13	1	1	0.8132
TOXPRINT_STRUCTURE	chain:aromaticAlkane_Ph-1_4-C1_acyclic	2	2.63	0.5982	85-60-9, 125-31-5	67	112	8195	2.18	1	1	0.8137
CTD_CHEMICALS_DISEASES	Fetal Alcohol Spectrum Disorders	2	2.63	0.5987	30299-08-2, 1565-94-2	25	96	2583	2.15	1	1	0.8137
CTD_CHEMICALS_DISEASES	Nystagmus, Congenital	2	2.63	0.5987	131-55-5, 79-95-8	25	96	2583	2.15	1	1	0.8137
TOXCAST_ACTIVE	ATG_PPARg_TRANS_up	7	9.21	0.6003	80-05-7, 131-55-5, 68392-35-8, 79-95-8, 79-94-7, 115-39-9, 77-40-7	18	503	1694	1.31	1	1	0.8147
CTD_CHEMICALS_DISEASES	Hepatomegaly	4	5.26	0.6014	77-09-8, 518-28-5, 79-94-7, 30299-08-2	25	488	2583	0.85	1	1	0.8147
CTD_CHEMICALS_DISEASES	Insulin Resistance	4	5.26	0.6016	79-95-8, 30299-08-2, 1565-94-2, 131-55-5	25	491	2583	0.84	1	1	0.8147
CTD_CHEMICALS_GOENRICH_CELLCOMP	GO:0097060|synaptic membrane	2	2.63	0.6017	80-05-7, 72-43-5	14	75	1103	2.1	1	1	0.8147
CTD_CHEMICALS_PATHWAYS	KEGG:hsa04080|Neuroactive ligand-receptor interaction	2	2.63	0.6018	80-05-7, 72-43-5	12	75	939	2.09	1	1	0.8147
TOXCAST_ACTIVE	ATG_NURR1_TRANS_up	2	2.63	0.6023	79-95-8, 80-05-7	18	89	1694	2.11	1	1	0.8147
PRODUCT_CLASS	Hormones, Endocrine and Metabolic	2	2.63	0.603	31477-60-8, 569-57-3	13	116	1571	2.08	1	1	0.8147
CTD_GOSLIM_BIOPROCESS	GO:0002376|immune system process	9	11.84	0.6036	67227-56-9, 143-74-8, 33419-42-0, 80-05-7, 2971-36-0, 518-28-5, 79-94-7, 72-43-5, 68392-35-8	16	899	1491	0.93	1	1	0.8147
CTD_GOSLIM_BIOPROCESS	GO:0007049|cell cycle	9	11.84	0.6037	72-43-5, 33419-42-0, 68392-35-8, 2971-36-0, 79-94-7, 518-28-5, 1565-94-2, 80-05-7, 143-74-8	16	663	1491	1.26	1	1	0.8147
CTD_GOSLIM_BIOPROCESS	GO:0006464|cellular protein modification process	8	10.53	0.6039	68392-35-8, 72-43-5, 518-28-5, 79-94-7, 2971-36-0, 80-05-7, 33419-42-0, 67227-56-9	16	827	1491	0.9	1	1	0.8147
TOXPRINT_STRUCTURE	bond:CX_halide_alkyl-Cl_dichloro_(1_1-)	2	2.63	0.6048	2971-36-0, 72-43-5	67	114	8195	2.15	1	1	0.8147
CTD_GOSLIM_BIOPROCESS	GO:0007568|aging	7	9.21	0.6057	33419-42-0, 68392-35-8, 72-43-5, 518-28-5, 79-94-7, 2971-36-0, 80-05-7	16	738	1491	0.88	1	1	0.8147
LEADSCOPE_TOXICITY	Genetic Toxicity: In vitro chrom. ab. CHL	9	11.84	0.6061	517-28-2, 603-50-9, 61445-50-9, 31127-54-5, 52479-85-3, 129-16-8, 67227-56-9, 2624-43-3, 139233-53-7	66	1136	7259	0.87	1	1	0.8147
CTD_CHEMICALS_GOENRICH_MOLFUNCT	GO:0015267|channel activity	2	2.63	0.6063	72-43-5, 80-05-7	14	75	1090	2.08	1	1	0.8147
CTD_CHEMICALS_GOENRICH_MOLFUNCT	GO:0035257|nuclear hormone receptor binding	2	2.63	0.6063	80-05-7, 68392-35-8	14	75	1090	2.08	1	1	0.8147
MULTICASE_TOX_PREDICTION	RCA reproductive toxicity in adult males, mouse	9	11.84	0.6063	16423-68-0, 117091-64-2, 29767-20-2, 518-28-5, 1260-17-9, 1943-97-1, 126-00-1, 6559-91-7, 33419-42-0	67	1209	7882	0.88	1	1	0.8147
CTD_CHEMICALS_DISEASES	Cleft Lip	2	2.63	0.6064	29767-20-2, 77-09-8	25	98	2583	2.11	1	1	0.8147
CTD_CHEMICALS_PATHWAYS	REACT:R-HSA-195258|RHO GTPase Effectors	2	2.63	0.6069	80-05-7, 2971-36-0	12	76	939	2.06	1	1	0.8147
CTD_CHEMICALS_DISEASES	Adenocarcinoma	7	9.21	0.6077	129-16-8, 131-55-5, 143-74-8, 77-09-8, 30299-08-2, 33419-42-0, 68392-35-8	25	521	2583	1.39	1	1	0.8153
CTD_CHEMICALS_GENES	FOS	2	2.63	0.6091	80-05-7, 68392-35-8	22	99	2273	2.09	1	1	0.8166
CTD_CHEMICALS_GOENRICH_MOLFUNCT	GO:0019903|protein phosphatase binding	2	2.63	0.6113	68392-35-8, 72-43-5	14	76	1090	2.05	1	1	0.819
PRODUCT_CLASS	Anti-cancers	2	2.63	0.6128	29767-20-2, 33419-42-0	13	119	1571	2.03	1	1	0.8202
HTS_STRONGACTIVE	generic stess:tox21-cre-agonist-p1_cre-agonist_1	2	2.63	0.6131	518-28-5, 5613-46-7	61	76	4870	2.1	1	1	0.8202
CTD_CHEMICALS_DISEASES	Aortic Valve Insufficiency	2	2.63	0.614	2971-36-0, 79-94-7	25	100	2583	2.07	1	1	0.8208
CTD_CHEMICALS_DISEASES	Kidney Diseases	7	9.21	0.6147	518-28-5, 68392-35-8, 33419-42-0, 569-57-3, 77-09-8, 129-16-8, 29767-20-2	25	539	2583	1.34	1	1	0.8208
TOXCAST_ACTIVE	NVS_ADME_rCYP3A1	2	2.63	0.6148	80-05-7, 2971-36-0	18	92	1694	2.05	1	1	0.8208
TOXCAST_ACTIVE	BSK_CASM3C_IL8_down	2	2.63	0.6189	79-94-7, 1478-61-1	18	93	1694	2.02	1	1	0.8251
TOXCAST_ACTIVE	BSK_CASM3C_SAA_down	2	2.63	0.6189	68392-35-8, 1478-61-1	18	93	1694	2.02	1	1	0.8251
MULTICASE_TOX_PREDICTION	Dendritic cell activation at 1mM (CD86, CD54)	29	38.16	0.622	71-67-0, 131-54-4, 38103-06-9, 31477-60-8, 79-95-8, 131-55-5, 1470-79-7, 518-28-5, 80-05-7, 16423-68-0, 117091-64-2, 41351-30-8, 139233-53-7, 518-47-8, 25327-89-3, 33419-42-0, 27072-45-3, 79-94-7, 115-39-9, 5613-46-7, 29767-20-2, 118-82-1, 1565-94-2, 61445-50-9, 6559-91-7, 52479-85-3, 21850-44-2, 79-97-0, 4162-45-2	67	3595	7882	0.95	1	1	0.8288
CTD_CHEMICALS_DISEASES	Acute Kidney Injury	7	9.21	0.6257	1565-94-2, 30299-08-2, 68392-35-8, 569-57-3, 77-09-8, 67227-56-9, 129-16-8	25	560	2583	1.29	1	1	0.8331
TOXPRINT_STRUCTURE	bond:C(=O)O_carboxylicEster_aliphatic	4	5.26	0.6263	603-50-9, 2624-43-3, 14008-48-1, 115-33-3	67	568	8195	0.86	1	1	0.8333
CTD_CHEMICALS_DISEASES	Reperfusion Injury	5	6.58	0.6286	518-28-5, 30299-08-2, 29767-20-2, 143-74-8, 67227-56-9	25	610	2583	0.85	1	1	0.8359
CTD_CHEMICALS_DISEASES	Liver Neoplasms, Experimental	7	9.21	0.6293	2971-36-0, 77-09-8, 569-57-3, 143-74-8, 16423-68-0, 129-16-8, 29767-20-2	25	566	2583	1.28	1	1	0.8362
CTD_CHEMICALS_PATHWAYS	KEGG:hsa04931|Insulin resistance	3	3.95	0.6313	33419-42-0, 79-94-7, 518-28-5	12	113	939	2.08	1	1	0.8377
CTD_CHEMICALS_PATHWAYS	REACT:R-HSA-500792|GPCR ligand binding	3	3.95	0.6313	72-43-5, 80-05-7, 2971-36-0	12	113	939	2.08	1	1	0.8377
CTD_CHEMICALS_DISEASES	Liver Neoplasms	8	10.53	0.633	30299-08-2, 2971-36-0, 1565-94-2, 518-28-5, 16423-68-0, 2624-43-3, 77-09-8, 29767-20-2	25	631	2583	1.31	1	1	0.8395
CTD_CHEMICALS_PATHWAYS	REACT:R-HSA-375165|NCAM signaling for neurite out-growth	3	3.95	0.6364	79-94-7, 68392-35-8, 80-05-7	12	117	939	2.01	1	1	0.8434
CTD_CHEMICALS_PATHWAYS	REACT:R-HSA-2586552|Signaling by Leptin	3	3.95	0.6405	68392-35-8, 72-43-5, 80-05-7	12	120	939	1.96	1	1	0.8483
CTD_CHEMICALS_PATHWAYS	REACT:R-HSA-5684996|MAPK1/MAPK3 signaling	3	3.95	0.642	68392-35-8, 72-43-5, 80-05-7	12	121	939	1.94	1	1	0.8496
CTD_CHEMICALS_DISEASES	Rhinitis, Allergic	3	3.95	0.644	1565-94-2, 80-05-7, 30299-08-2	25	147	2583	2.11	1	1	0.8518
TOXCAST_ACTIVE	BSK_CASM3C_MCP1_down	3	3.95	0.6455	79-94-7, 27955-94-8, 72-43-5	18	140	1694	2.02	1	1	0.8532
CTD_CHEMICALS_DISEASES	HIV Wasting Syndrome	3	3.95	0.647	33419-42-0, 2971-36-0, 68392-35-8	25	150	2583	2.07	1	1	0.8543
CTD_CHEMICALS_DISEASES	Neoplasm Metastasis	6	7.89	0.6472	143-74-8, 77-09-8, 85-60-9, 29767-20-2, 30299-08-2, 79-95-8	25	677	2583	0.92	1	1	0.8543
CTD_CHEMICALS_DISEASES	Hypothermia	3	3.95	0.648	16423-68-0, 72-43-5, 131-55-5	25	151	2583	2.05	1	1	0.8544
HTS_STRONGACTIVE	counter screen (cell viability):tox21-rxr-bla-agonist-p1_viability_1	7	9.21	0.6482	68392-35-8, 4221-68-5, 1565-94-2, 68047-06-3, 24038-68-4, 85-60-9, 1943-97-1	61	428	4870	1.31	1	1	0.8544
HTS_ACTIVE	retinoid homeostasis:tox21-rar-agonist-p1_rar-agonist_1	7	9.21	0.6511	131-54-4, 139233-53-7, 611-99-4, 61445-50-9, 620-92-8, 31127-54-5, 517-28-2	68	515	6512	1.3	1	1	0.8576
TOXCAST_ACTIVE	OT_AR_ARELUC_AG_1440	3	3.95	0.6526	27955-94-8, 115-39-9, 131-55-5	18	146	1694	1.93	1	1	0.8591
CTD_CHEMICALS_PATHWAYS	REACT:R-HSA-5218921|VEGFR2 mediated cell proliferation	3	3.95	0.6542	68392-35-8, 80-05-7, 72-43-5	12	129	939	1.82	1	1	0.8606
MULTICASE_TOX_PREDICTION	RCA survival post-implantation, mouse	7	9.21	0.6556	3236-71-3, 31477-60-8, 38103-06-9, 569-57-3, 4162-45-2, 68392-35-8, 68047-06-3	67	642	7882	1.28	1	1	0.8619
CTD_CHEMICALS_GOENRICH_CELLCOMP	GO:0005759|mitochondrial matrix	3	3.95	0.6572	518-28-5, 80-05-7, 33419-42-0	14	129	1103	1.83	1	1	0.8634
CTD_CHEMICALS_DISEASES	Pulmonary Edema	3	3.95	0.6587	30299-08-2, 1565-94-2, 518-28-5	25	161	2583	1.93	1	1	0.8649
CTD_CHEMICALS_DISEASES	Hypertension	10	13.16	0.6603	30299-08-2, 1565-94-2, 129-16-8, 67227-56-9, 77-09-8, 68392-35-8, 1260-17-9, 29767-20-2, 16423-68-0, 569-57-3	25	825	2583	1.25	1	1	0.8664
CTD_CHEMICALS_PATHWAYS	KEGG:hsa04722|Neurotrophin signaling pathway	3	3.95	0.6625	33419-42-0, 518-28-5, 68392-35-8	12	134	939	1.75	1	1	0.8686
CTD_CHEMICALS_PATHWAYS	KEGG:hsa04014|Ras signaling pathway	3	3.95	0.6642	80-05-7, 72-43-5, 68392-35-8	12	135	939	1.74	1	1	0.8697
TOXCAST_ACTIVE	OT_NURR1_NURR1RXRa_0480	3	3.95	0.6642	79-95-8, 115-39-9, 79-94-7	18	155	1694	1.82	1	1	0.8697
CTD_CHEMICALS_GOENRICH_MOLFUNCT	GO:0046982|protein heterodimerization activity	3	3.95	0.6698	80-05-7, 68392-35-8, 79-94-7	14	135	1090	1.73	1	1	0.8764
TOXCAST_ACTIVE	Tox21_NFkB_BLA_agonist_viability	3	3.95	0.6738	115-39-9, 68392-35-8, 79-94-7	18	162	1694	1.74	1	1	0.8812
CTD_CHEMICALS_PATHWAYS	REACT:R-HSA-112399|IRS-mediated signalling	3	3.95	0.6747	80-05-7, 72-43-5, 68392-35-8	12	141	939	1.66	1	1	0.8817
TOXCAST_ACTIVE	BSK_CASM3C_HLADR_down	3	3.95	0.6753	68392-35-8, 27955-94-8, 79-94-7	18	163	1694	1.73	1	1	0.8819
HTS_STRONGACTIVE	counter screen (cell viability):tox21-pr-bla-agonist-p1_viability_1	6	7.89	0.6775	24038-68-4, 85-60-9, 1943-97-1, 76-60-8, 4221-68-5, 68047-06-3	61	532	4870	0.9	1	1	0.8841
TOXPRINT_STRUCTURE	group:carbohydrate_ketohexose	3	3.95	0.6783	29767-20-2, 33419-42-0, 117091-64-2	67	202	8195	1.82	1	1	0.8847
CTD_CHEMICALS_GOENRICH_CELLCOMP	GO:0016604|nuclear body	3	3.95	0.6791	518-28-5, 68392-35-8, 33419-42-0	14	142	1103	1.66	1	1	0.8852
TOXPRINT_STRUCTURE	chain:alkeneLinear_mono-ene_ethylene_generic	6	7.89	0.6801	68392-35-8, 68047-06-3, 25327-89-3, 14868-03-2, 569-57-3, 1565-94-2	67	822	8195	0.89	1	1	0.8859
TOXPRINT_STRUCTURE	bond:COH_alcohol_sec-alkyl	6	7.89	0.681	1565-94-2, 6559-91-7, 33419-42-0, 117091-64-2, 29767-20-2, 518-28-5	67	833	8195	0.88	1	1	0.8864
TOXPRINT_STRUCTURE	group:carbohydrate_aldopentose	3	3.95	0.6814	29767-20-2, 33419-42-0, 117091-64-2	67	205	8195	1.79	1	1	0.8864
CTD_CHEMICALS_PATHWAYS	REACT:R-HSA-2871796|FCERI mediated MAPK activation	3	3.95	0.6838	72-43-5, 80-05-7, 68392-35-8	12	146	939	1.61	1	1	0.8882
TOXCAST_ACTIVE	ATG_HIF1a_CIS_up	3	3.95	0.6839	16423-68-0, 77-09-8, 27955-94-8	18	169	1694	1.67	1	1	0.8882
LEADSCOPE_TOXICITY	Developmental Toxicity: post impl. loss rat	9	11.84	0.6842	126-00-1, 33419-42-0, 6559-91-7, 22345-47-7, 29767-20-2, 117091-64-2, 31477-60-8, 72-43-5, 518-28-5	66	773	7259	1.28	1	1	0.8882
TOXPRINT_STRUCTURE	bond:CC(=O)C_ketone_generic	9	11.84	0.685	31127-54-5, 52479-85-3, 61445-50-9, 1470-79-7, 131-55-5, 41351-30-8, 611-99-4, 16423-68-0, 131-54-4	67	862	8195	1.28	1	1	0.8887
CTD_CHEMICALS_GENES	BCL2	3	3.95	0.6867	33419-42-0, 80-05-7, 79-94-7	22	185	2273	1.68	1	1	0.8903
CTD_CHEMICALS_DISEASES	Bone Diseases, Metabolic	3	3.95	0.6871	131-55-5, 85-60-9, 29767-20-2	25	184	2583	1.68	1	1	0.8903
CTD_CHEMICALS_GOENRICH_CELLCOMP	GO:0044451|nucleoplasm part	3	3.95	0.6881	33419-42-0, 68392-35-8, 518-28-5	14	147	1103	1.61	1	1	0.8908
CTD_CHEMICALS_DISEASES	Asbestosis	3	3.95	0.6885	67227-56-9, 80-05-7, 33419-42-0	25	185	2583	1.68	1	1	0.8908
CTD_CHEMICALS_GOENRICH_MOLFUNCT	GO:0008083|growth factor activity	3	3.95	0.6895	80-05-7, 2971-36-0, 79-94-7	14	146	1090	1.6	1	1	0.8914
CTD_CHEMICALS_DISEASES	Cardiomyopathy, Dilated	3	3.95	0.6898	77-09-8, 2971-36-0, 68392-35-8	25	186	2583	1.67	1	1	0.8914
TOXCAST_ACTIVE	APR_HepG2_p53Act_24h_up	3	3.95	0.6988	27955-94-8, 77-40-7, 77-09-8	18	179	1694	1.58	1	1	0.9025
CTD_CHEMICALS_PATHWAYS	REACT:R-HSA-535734|Fatty acid, triacylglycerol, and ketone body metabolism	2	2.63	0.6996	80-05-7, 2971-36-0	12	167	939	0.94	1	1	0.9025
CTD_CHEMICALS_PATHWAYS	KEGG:hsa05162|Measles	2	2.63	0.6998	79-94-7, 72-43-5	12	175	939	0.89	1	1	0.9025
CTD_CHEMICALS_PATHWAYS	KEGG:hsa04659|Th17 cell differentiation	2	2.63	0.7019	72-43-5, 68392-35-8	12	157	939	1	1	1	0.9046
CTD_CHEMICALS_GOENRICH_CELLCOMP	GO:0030424|axon	2	2.63	0.7044	72-43-5, 79-94-7	14	171	1103	0.92	1	1	0.9069
CTD_CHEMICALS_GOENRICH_CELLCOMP	GO:0098794|postsynapse	2	2.63	0.705	72-43-5, 79-94-7	14	177	1103	0.89	1	1	0.9069
CTD_CHEMICALS_GOENRICH_MOLFUNCT	GO:0020037|heme binding	2	2.63	0.7055	68392-35-8, 72-43-5	14	158	1090	0.99	1	1	0.9069
CTD_CHEMICALS_GOENRICH_MOLFUNCT	GO:0046906|tetrapyrrole binding	2	2.63	0.7055	72-43-5, 68392-35-8	14	158	1090	0.99	1	1	0.9069
CTD_CHEMICALS_DISEASES	Lewy Body Disease	3	3.95	0.7073	2971-36-0, 68392-35-8, 33419-42-0	25	199	2583	1.56	1	1	0.9083
CTD_CHEMICALS_GOENRICH_MOLFUNCT	GO:0015318|inorganic molecular entity transmembrane transporter activity	2	2.63	0.7076	79-94-7, 72-43-5	14	184	1090	0.85	1	1	0.9083
HTS_STRONGACTIVE	counter screen (cell viability):tox21-cre-agonist-p1_viability_1	3	3.95	0.7079	85-60-9, 603-50-9, 1565-94-2	61	150	4870	1.6	1	1	0.9083
HTS_STRONGACTIVE	heat shock stress:tox21-hse-bla-p1_hse-agonist_1	3	3.95	0.7097	4162-45-2, 16423-68-0, 85-60-9	61	151	4870	1.59	1	1	0.9089
CTD_CHEMICALS_DISEASES	Adenoma	3	3.95	0.71	72-43-5, 143-74-8, 80-05-7	25	201	2583	1.54	1	1	0.9089
LEADSCOPE_TOXICITY	Developmental Toxicity: fetal death rodent	10	13.16	0.7102	6559-91-7, 33419-42-0, 518-28-5, 2971-36-0, 517-28-2, 72-43-5, 569-57-3, 31477-60-8, 117091-64-2, 29767-20-2	66	923	7259	1.19	1	1	0.9089
TOXCAST_ACTIVE	Tox21_AR_BLA_Antagonist_viability	3	3.95	0.711	79-94-7, 2971-36-0, 68392-35-8	18	187	1694	1.51	1	1	0.9089
CTD_CHEMICALS_DISEASES	Depressive Disorder, Major	3	3.95	0.7114	80-05-7, 131-55-5, 72-43-5	25	202	2583	1.53	1	1	0.9089
TOXCAST_ACTIVE	NVS_MP_hPBR	2	2.63	0.7134	115-39-9, 77-40-7	18	218	1694	0.86	1	1	0.9089
CTD_CHEMICALS_GENES	IL6	2	2.63	0.715	79-94-7, 80-05-7	22	227	2273	0.91	1	1	0.9089
CTD_CHEMICALS_GENES	IL1B	2	2.63	0.7157	79-94-7, 80-05-7	22	231	2273	0.89	1	1	0.9089
CTD_CHEMICALS_DISEASES	Protein Deficiency	2	2.63	0.7161	30299-08-2, 79-94-7	25	214	2583	0.97	1	1	0.9089
CTD_CHEMICALS_DISEASES	Hypertrophy	2	2.63	0.7161	2971-36-0, 72-43-5	25	217	2583	0.95	1	1	0.9089
CTD_CHEMICALS_DISEASES	Pleurisy	2	2.63	0.7161	2971-36-0, 72-43-5	25	217	2583	0.95	1	1	0.9089
CTD_CHEMICALS_DISEASES	Ceroid Lipofuscinosis, Neuronal, 6	2	2.63	0.7162	72-43-5, 79-94-7	25	211	2583	0.98	1	1	0.9089
CTD_CHEMICALS_DISEASES	Uterine Cervical Neoplasms	2	2.63	0.7162	16423-68-0, 72-43-5	25	211	2583	0.98	1	1	0.9089
CTD_CHEMICALS_DISEASES	Lymphoma, T-Cell, Cutaneous	2	2.63	0.7163	80-05-7, 143-74-8	25	221	2583	0.94	1	1	0.9089
CTD_CHEMICALS_DISEASES	Heat Stroke	2	2.63	0.7165	68392-35-8, 2971-36-0	25	223	2583	0.93	1	1	0.9089
CTD_CHEMICALS_DISEASES	Retinal Detachment	2	2.63	0.7165	33419-42-0, 518-28-5	25	223	2583	0.93	1	1	0.9089
MULTICASE_TOX_PREDICTION	RCA human coronary artery disorders	3	3.95	0.7166	68047-06-3, 67227-56-9, 68392-35-8	67	228	7882	1.55	1	1	0.9089
CTD_CHEMICALS_DISEASES	Asphyxia Neonatorum	2	2.63	0.7167	33419-42-0, 30299-08-2	25	225	2583	0.92	1	1	0.9089
CTD_CHEMICALS_GENES	CYP1A1	2	2.63	0.7185	72-43-5, 68392-35-8	22	242	2273	0.85	1	1	0.9097
CTD_CHEMICALS_GOENRICH_CELLCOMP	GO:0015630|microtubule cytoskeleton	4	5.26	0.7188	143-74-8, 518-28-5, 68392-35-8, 33419-42-0	14	206	1103	1.53	1	1	0.9097
CTD_GOSLIM_BIOPROCESS	GO:0006520|cellular amino acid metabolic process	4	5.26	0.7188	518-28-5, 79-94-7, 80-05-7, 33419-42-0	16	236	1491	1.58	1	1	0.9097
CTD_CHEMICALS_DISEASES	Pleural Diseases	2	2.63	0.7192	67227-56-9, 79-94-7	25	237	2583	0.87	1	1	0.9097
CTD_CHEMICALS_DISEASES	Anemia	2	2.63	0.72	518-28-5, 77-09-8	25	240	2583	0.86	1	1	0.9102
CTD_CHEMICALS_DISEASES	Alcoholism	2	2.63	0.7207	77-09-8, 79-95-8	25	242	2583	0.85	1	1	0.9104
CTD_CHEMICALS_DISEASES	COVID-19	2	2.63	0.7213	2971-36-0, 1565-94-2	25	244	2583	0.85	1	1	0.9105
CTD_CHEMICALS_DISEASES	Pain	2	2.63	0.7217	131-55-5, 16423-68-0	25	245	2583	0.84	1	1	0.9105
CTD_CHEMICALS_DISEASES	Leishmaniasis, Cutaneous	2	2.63	0.7228	2971-36-0, 33419-42-0	25	248	2583	0.83	1	1	0.9107
CTD_CHEMICALS_DISEASES	Pneumonia, Pneumococcal	2	2.63	0.7228	79-94-7, 33419-42-0	25	248	2583	0.83	1	1	0.9107
CTD_CHEMICALS_GOENRICH_CELLCOMP	GO:0043025|neuronal cell body	4	5.26	0.7268	72-43-5, 68392-35-8, 80-05-7, 79-94-7	14	216	1103	1.46	1	1	0.915
CTD_CHEMICALS_DISEASES	Learning Disabilities	4	5.26	0.7271	77-09-8, 518-28-5, 131-55-5, 16423-68-0	25	258	2583	1.6	1	1	0.915
CTD_CHEMICALS_PATHWAYS	KEGG:hsa01524|Platinum drug resistance	4	5.26	0.7287	33419-42-0, 72-43-5, 79-94-7, 518-28-5	12	223	939	1.4	1	1	0.9164
CTD_CHEMICALS_PATHWAYS	REACT:R-HSA-6798695|Neutrophil degranulation	4	5.26	0.7296	33419-42-0, 143-74-8, 80-05-7, 2971-36-0	12	224	939	1.4	1	1	0.9171
HTS_STRONGACTIVE	cytotoxicity:tox21-rt-viability-hek293-p1_viability@glo_16h_1	12	15.79	0.7302	1565-94-2, 33419-42-0, 4162-45-2, 79-97-0, 85-60-9, 620-92-8, 68047-06-3, 4221-68-5, 68392-35-8, 5613-46-7, 13080-86-9, 24038-68-4	61	825	4870	1.16	1	1	0.9172
CTD_CHEMICALS_PATHWAYS	REACT:R-HSA-69278|Cell Cycle, Mitotic	4	5.26	0.7317	80-05-7, 2971-36-0, 518-28-5, 33419-42-0	12	226	939	1.38	1	1	0.9184
CTD_CHEMICALS_DISEASES	Proteinuria	4	5.26	0.7363	72-43-5, 16423-68-0, 30299-08-2, 131-55-5	25	275	2583	1.5	1	1	0.9226
MULTICASE_TOX_PREDICTION	Human oral bioavailability, F > 80% as actives	10	13.16	0.7363	115-39-9, 71-67-0, 16423-68-0, 34487-61-1, 79-95-8, 79-97-0, 76-60-8, 125-31-5, 143-74-8, 85-60-9	67	1265	7882	0.93	1	1	0.9226
MULTICASE_TOX_PREDICTION	RCA sperm toxicity, rat	4	5.26	0.7364	517-28-2, 72-43-5, 2971-36-0, 31477-60-8	67	292	7882	1.61	1	1	0.9226
CTD_CHEMICALS_PATHWAYS	REACT:R-HSA-372790|Signaling by GPCR	3	3.95	0.7381	2971-36-0, 79-94-7, 72-43-5	12	242	939	0.97	1	1	0.924
CTD_CHEMICALS_PATHWAYS	KEGG:hsa05145|Toxoplasmosis	5	6.58	0.7386	79-94-7, 518-28-5, 33419-42-0, 72-43-5, 68392-35-8	12	272	939	1.44	1	1	0.924
CTD_CHEMICALS_PATHWAYS	REACT:R-HSA-76002|Platelet activation, signaling and aggregation	3	3.95	0.7389	72-43-5, 68392-35-8, 80-05-7	12	239	939	0.98	1	1	0.924
CTD_CHEMICALS_DISEASES	Crohn Disease	4	5.26	0.7426	518-28-5, 30299-08-2, 2971-36-0, 68392-35-8	25	285	2583	1.45	1	1	0.9281
CTD_CHEMICALS_PATHWAYS	KEGG:hsa05142|Chagas disease (American trypanosomiasis)	5	6.58	0.7432	518-28-5, 79-94-7, 2971-36-0, 72-43-5, 33419-42-0	12	285	939	1.37	1	1	0.9282
CTD_CHEMICALS_GOENRICH_CELLCOMP	GO:0098796|membrane protein complex	3	3.95	0.744	518-28-5, 72-43-5, 33419-42-0	14	262	1103	0.9	1	1	0.9286
CTD_CHEMICALS_GOENRICH_CELLCOMP	GO:0005768|endosome	3	3.95	0.7448	68392-35-8, 72-43-5, 79-94-7	14	267	1103	0.89	1	1	0.9288
LEADSCOPE_TOXICITY	Neurotoxicity: pup behavior rodent	11	14.47	0.7451	80-05-7, 569-57-3, 14868-03-2, 77-40-7, 2971-36-0, 620-92-8, 79-94-7, 1943-97-1, 6807-17-6, 1478-61-1, 118-82-1	66	1302	7259	0.93	1	1	0.9288
CTD_CHEMICALS_GOENRICH_MOLFUNCT	GO:0044389|ubiquitin-like protein ligase binding	5	6.58	0.7474	68392-35-8, 33419-42-0, 518-28-5, 79-94-7, 80-05-7	14	274	1090	1.42	1	1	0.9311
CTD_CHEMICALS_DISEASES	Lung Diseases	4	5.26	0.7489	1565-94-2, 2971-36-0, 68392-35-8, 33419-42-0	25	294	2583	1.41	1	1	0.9323
CTD_CHEMICALS_DISEASES	Respiratory Distress Syndrome, Adult	4	5.26	0.754	29767-20-2, 67227-56-9, 1565-94-2, 569-57-3	25	301	2583	1.37	1	1	0.9375
CTD_CHEMICALS_PATHWAYS	KEGG:hsa05164|Influenza A	5	6.58	0.754	68392-35-8, 72-43-5, 33419-42-0, 79-94-7, 518-28-5	12	304	939	1.29	1	1	0.9375
HTS_STRONGACTIVE	neurotransmission:tox21-ache-p5_ache-inhibitor_1	4	5.26	0.7561	24038-68-4, 79-94-7, 68047-06-3, 3236-71-3	61	225	4870	1.42	1	1	0.9378
CTD_CHEMICALS_DISEASES	Diabetic Angiopathies	4	5.26	0.7585	33419-42-0, 72-43-5, 1565-94-2, 67227-56-9	25	307	2583	1.35	1	1	0.9378
CTD_CHEMICALS_DISEASES	Osteoporosis	4	5.26	0.7585	33419-42-0, 68392-35-8, 129-16-8, 67227-56-9	25	307	2583	1.35	1	1	0.9378
CTD_CHEMICALS_PATHWAYS	KEGG:hsa05200|Pathways in cancer	7	9.21	0.759	80-05-7, 68392-35-8, 33419-42-0, 72-43-5, 518-28-5, 79-94-7, 2971-36-0	12	572	939	0.96	1	1	0.9378
CTD_CHEMICALS_DISEASES	Hepatitis, Chronic	3	3.95	0.7595	1565-94-2, 518-28-5, 30299-08-2	25	323	2583	0.96	1	1	0.9378
CTD_CHEMICALS_DISEASES	Infarction, Middle Cerebral Artery	3	3.95	0.7595	33419-42-0, 2971-36-0, 131-55-5	25	322	2583	0.96	1	1	0.9378
CTD_CHEMICALS_DISEASES	Barrett Esophagus	3	3.95	0.7597	79-95-8, 68392-35-8, 30299-08-2	25	316	2583	0.98	1	1	0.9378
CTD_CHEMICALS_DISEASES	Neoplasms, Experimental	3	3.95	0.7598	16423-68-0, 2971-36-0, 68392-35-8	25	314	2583	0.99	1	1	0.9378
CTD_CHEMICALS_DISEASES	Lupus Erythematosus, Systemic	3	3.95	0.7599	1565-94-2, 30299-08-2, 72-43-5	25	313	2583	0.99	1	1	0.9378
CTD_CHEMICALS_DISEASES	Arthritis, Experimental	3	3.95	0.7599	68392-35-8, 1565-94-2, 30299-08-2	25	312	2583	0.99	1	1	0.9378
CTD_CHEMICALS_GOENRICH_MOLFUNCT	GO:0016773|phosphotransferase activity, alcohol group as acceptor	5	6.58	0.7604	518-28-5, 79-94-7, 68392-35-8, 33419-42-0, 72-43-5	14	300	1090	1.3	1	1	0.9378
CTD_CHEMICALS_DISEASES	Dermatitis, Atopic	3	3.95	0.7604	79-94-7, 30299-08-2, 131-55-5	25	338	2583	0.92	1	1	0.9378
CTD_CHEMICALS_DISEASES	Subarachnoid Hemorrhage	3	3.95	0.7622	1565-94-2, 518-28-5, 30299-08-2	25	349	2583	0.89	1	1	0.9378
CTD_CHEMICALS_PATHWAYS	KEGG:hsa04933|AGE-RAGE signaling pathway in diabetic complications	6	7.89	0.7629	518-28-5, 79-94-7, 2971-36-0, 68392-35-8, 33419-42-0, 72-43-5	12	377	939	1.25	1	1	0.9378
CTD_CHEMICALS_PATHWAYS	REACT:R-HSA-1643685|Disease	7	9.21	0.7629	79-94-7, 518-28-5, 2971-36-0, 68392-35-8, 33419-42-0, 72-43-5, 67227-56-9	12	435	939	1.26	1	1	0.9378
CTD_CHEMICALS_PATHWAYS	KEGG:hsa04151|PI3K-Akt signaling pathway	7	9.21	0.7633	80-05-7, 33419-42-0, 72-43-5, 68392-35-8, 2971-36-0, 79-94-7, 518-28-5	12	438	939	1.25	1	1	0.9378
CTD_CHEMICALS_DISEASES	Multiple Myeloma	3	3.95	0.7637	68392-35-8, 79-94-7, 518-28-5	25	356	2583	0.87	1	1	0.9378
CTD_CHEMICALS_DISEASES	Wounds and Injuries	3	3.95	0.7637	29767-20-2, 72-43-5, 1565-94-2	25	356	2583	0.87	1	1	0.9378
CTD_CHEMICALS_GOENRICH_MOLFUNCT	GO:0016772|transferase activity, transferring phosphorus-containing groups	5	6.58	0.7638	79-94-7, 518-28-5, 33419-42-0, 72-43-5, 68392-35-8	14	305	1090	1.28	1	1	0.9378
CTD_CHEMICALS_DISEASES	Coronary Artery Disease	5	6.58	0.7655	68392-35-8, 2971-36-0, 85-60-9, 29767-20-2, 131-55-5	25	363	2583	1.42	1	1	0.9378
CTD_CHEMICALS_GOENRICH_MOLFUNCT	GO:0032555|purine ribonucleotide binding	6	7.89	0.7656	68392-35-8, 33419-42-0, 72-43-5, 79-94-7, 518-28-5, 143-74-8	14	349	1090	1.34	1	1	0.9378
CTD_CHEMICALS_GOENRICH_CELLCOMP	GO:0043229|intracellular organelle	9	11.84	0.767	16423-68-0, 29767-20-2, 2971-36-0, 72-43-5, 68392-35-8, 67227-56-9, 143-74-8, 1565-94-2, 79-95-8	14	743	1103	0.95	1	1	0.9378
CTD_CHEMICALS_GOENRICH_CELLCOMP	GO:0005789|endoplasmic reticulum membrane	6	7.89	0.7672	68392-35-8, 72-43-5, 33419-42-0, 79-94-7, 518-28-5, 2971-36-0	14	361	1103	1.31	1	1	0.9378
HTS_STRONGACTIVE	autofluorescence:tox21-spec-hepg2-p1_autofluor@med-blue-n_1	4	5.26	0.7673	15086-94-9, 129-16-8, 61445-50-9, 15905-32-5	61	237	4870	1.35	1	1	0.9378
CTD_CHEMICALS_GOENRICH_CELLCOMP	GO:0042175|nuclear outer membrane-endoplasmic reticulum membrane network	6	7.89	0.7675	2971-36-0, 79-94-7, 518-28-5, 33419-42-0, 72-43-5, 68392-35-8	14	362	1103	1.31	1	1	0.9378
CTD_CHEMICALS_GOENRICH_CELLCOMP	GO:0098827|endoplasmic reticulum subcompartment	6	7.89	0.7678	72-43-5, 33419-42-0, 68392-35-8, 2971-36-0, 79-94-7, 518-28-5	14	363	1103	1.3	1	1	0.9378
HTS_STRONGACTIVE	cytotoxicity:tox21-rt-viability-hepg2-p1_viability@glo_8h_1	4	5.26	0.7683	85-60-9, 1565-94-2, 4221-68-5, 518-47-8	61	238	4870	1.34	1	1	0.9378
CTD_CHEMICALS_GOENRICH_MOLFUNCT	GO:0032553|ribonucleotide binding	6	7.89	0.7684	143-74-8, 72-43-5, 33419-42-0, 68392-35-8, 518-28-5, 79-94-7	14	361	1090	1.29	1	1	0.9378
MULTICASE_TOX_PREDICTION	MRP1 inhibition at 10uM	17	22.37	0.7687	139233-53-7, 2624-43-3, 10040-45-6, 67227-56-9, 6559-91-7, 117091-64-2, 29767-20-2, 41351-30-8, 518-28-5, 22345-47-7, 33419-42-0, 569-57-3, 131-54-4, 38103-06-9, 68047-06-3, 71-67-0, 68392-35-8	67	1795	7882	1.11	1	1	0.9378
HTS_STRONGACTIVE	genotoxic stress:tox21-h2ax-cho-p2_gh2ax-inducer_1	3	3.95	0.7687	33419-42-0, 24038-68-4, 68047-06-3	61	245	4870	0.98	1	1	0.9378
CTD_CHEMICALS_PATHWAYS	KEGG:hsa04210|Apoptosis	5	6.58	0.769	2971-36-0, 79-94-7, 518-28-5, 33419-42-0, 72-43-5	12	394	939	0.99	1	1	0.9378
TOXPRINT_STRUCTURE	bond:CX_halide_alkyl-X_dihalo_(1_1-)	3	3.95	0.7702	1478-61-1, 2971-36-0, 72-43-5	67	385	8195	0.95	1	1	0.9382
TOXPRINT_STRUCTURE	ring:hetero_[6]_Z_1_3-	3	3.95	0.7703	33419-42-0, 29767-20-2, 117091-64-2	67	387	8195	0.95	1	1	0.9382
CTD_CHEMICALS_GOENRICH_MOLFUNCT	GO:0030234|enzyme regulator activity	6	7.89	0.7707	72-43-5, 33419-42-0, 68392-35-8, 2971-36-0, 518-28-5, 79-94-7	14	368	1090	1.27	1	1	0.9382
HTS_STRONGACTIVE	energy homeostasis:tox21-pgc-err-p1_pgc-err-agonist_1	3	3.95	0.7716	131-54-4, 518-28-5, 33419-42-0	61	265	4870	0.9	1	1	0.9386
CTD_CHEMICALS_DISEASES	Weight Gain	5	6.58	0.7724	143-74-8, 77-09-8, 72-43-5, 79-94-7, 518-28-5	25	383	2583	1.35	1	1	0.939
HTS_STRONGACTIVE	retinoid homeostasis:tox21-rar-antagonist-p2_rar-antagonist_1	3	3.95	0.7735	27955-94-8, 33419-42-0, 5613-46-7	61	272	4870	0.88	1	1	0.9399
CTD_CHEMICALS_GOENRICH_CELLCOMP	GO:0042995|cell projection	6	7.89	0.7752	518-28-5, 79-94-7, 33419-42-0, 72-43-5, 68392-35-8, 143-74-8	14	383	1103	1.23	1	1	0.941
TOXPRINT_STRUCTURE	ring:hetero_[6]_Z_generic	16	21.05	0.776	31477-60-8, 603-50-9, 33419-42-0, 27072-45-3, 14008-48-1, 517-28-2, 15905-32-5, 29767-20-2, 117091-64-2, 16423-68-0, 518-47-8, 13473-26-2, 129-16-8, 10040-45-6, 139233-53-7, 15086-94-9	67	2025	8195	0.97	1	1	0.941
TOXCAST_ACTIVE	ATG_AP_1_CIS_up	4	5.26	0.7761	72-43-5, 77-40-7, 1478-61-1, 80-05-7	18	389	1694	0.97	1	1	0.941
HTS_STRONGACTIVE	counter screen (cell viability):tox21-gr-hela-bla-antagonist-p1_viability_1	5	6.58	0.7764	5613-46-7, 68047-06-3, 115-39-9, 85-60-9, 4162-45-2	61	280	4870	1.43	1	1	0.941
CTD_CHEMICALS_GOENRICH_MOLFUNCT	GO:0019904|protein domain specific binding	7	9.21	0.7769	2971-36-0, 79-94-7, 518-28-5, 33419-42-0, 72-43-5, 68392-35-8, 143-74-8	14	433	1090	1.26	1	1	0.941
CTD_CHEMICALS_GOENRICH_MOLFUNCT	GO:0005102|signaling receptor binding	8	10.53	0.7781	2971-36-0, 518-28-5, 79-94-7, 33419-42-0, 79-95-8, 72-43-5, 68392-35-8, 67227-56-9	14	650	1090	0.96	1	1	0.9411
CTD_CHEMICALS_GOENRICH_CELLCOMP	GO:0097458|neuron part	6	7.89	0.7782	143-74-8, 68392-35-8, 72-43-5, 33419-42-0, 79-94-7, 518-28-5	14	389	1103	1.22	1	1	0.9411
CTD_CHEMICALS_GOENRICH_CELLCOMP	GO:0012505|endomembrane system	10	13.16	0.7794	33419-42-0, 1565-94-2, 143-74-8, 67227-56-9, 68392-35-8, 72-43-5, 79-94-7, 518-28-5, 2971-36-0, 16423-68-0	14	705	1103	1.12	1	1	0.9411
CTD_CHEMICALS_GOENRICH_CELLCOMP	GO:0098590|plasma membrane region	6	7.89	0.7798	143-74-8, 68392-35-8, 33419-42-0, 72-43-5, 79-94-7, 518-28-5	14	392	1103	1.21	1	1	0.9411
CTD_CHEMICALS_GOENRICH_CELLCOMP	GO:0005739|mitochondrion	6	7.89	0.781	518-28-5, 79-94-7, 2971-36-0, 68392-35-8, 33419-42-0, 72-43-5	14	508	1103	0.93	1	1	0.9411
CTD_CHEMICALS_GOENRICH_MOLFUNCT	GO:0008144|drug binding	6	7.89	0.7811	33419-42-0, 72-43-5, 68392-35-8, 2971-36-0, 79-94-7, 518-28-5	14	498	1090	0.94	1	1	0.9411
CTD_CHEMICALS_GOENRICH_CELLCOMP	GO:0016020|membrane	8	10.53	0.7813	67227-56-9, 143-74-8, 72-43-5, 33419-42-0, 68392-35-8, 2971-36-0, 518-28-5, 79-94-7	14	646	1103	0.98	1	1	0.9411
CTD_GOSLIM_BIOPROCESS	GO:0009058|biosynthetic process	11	14.47	0.7822	131-55-5, 79-95-8, 33419-42-0, 1565-94-2, 29767-20-2, 80-05-7, 72-43-5, 68392-35-8, 2971-36-0, 518-28-5, 79-94-7	16	1039	1491	0.99	1	1	0.9411
CTD_CHEMICALS_GOENRICH_MOLFUNCT	GO:0046983|protein dimerization activity	6	7.89	0.7828	68392-35-8, 72-43-5, 33419-42-0, 518-28-5, 79-94-7, 2971-36-0	14	484	1090	0.97	1	1	0.9411
CTD_CHEMICALS_GOENRICH_CELLCOMP	GO:0031410|cytoplasmic vesicle	8	10.53	0.7835	67227-56-9, 143-74-8, 2971-36-0, 79-94-7, 518-28-5, 33419-42-0, 72-43-5, 68392-35-8	14	532	1103	1.18	1	1	0.9411
CTD_CHEMICALS_GOENRICH_CELLCOMP	GO:0097708|intracellular vesicle	8	10.53	0.7835	143-74-8, 67227-56-9, 68392-35-8, 72-43-5, 33419-42-0, 79-94-7, 518-28-5, 2971-36-0	14	532	1103	1.18	1	1	0.9411
CTD_GOSLIM_BIOPROCESS	GO:0008283|cell proliferation	12	15.79	0.785	72-43-5, 68392-35-8, 2971-36-0, 518-28-5, 79-94-7, 29767-20-2, 16423-68-0, 80-05-7, 79-95-8, 33419-42-0, 1565-94-2, 67227-56-9	16	983	1491	1.14	1	1	0.9411
CTD_CHEMICALS_DISEASES	Cardiomegaly	4	5.26	0.7851	1565-94-2, 30299-08-2, 79-95-8, 67227-56-9	25	430	2583	0.96	1	1	0.9411
CTD_CHEMICALS_DISEASES	Thyroid Neoplasms	4	5.26	0.7852	30299-08-2, 68392-35-8, 16423-68-0, 29767-20-2	25	433	2583	0.95	1	1	0.9411
CTD_CHEMICALS_DISEASES	Myocardial Reperfusion Injury	4	5.26	0.7852	16423-68-0, 29767-20-2, 518-28-5, 30299-08-2	25	426	2583	0.97	1	1	0.9411
CTD_CHEMICALS_GOENRICH_CELLCOMP	GO:0005783|endoplasmic reticulum	7	9.21	0.7852	33419-42-0, 72-43-5, 68392-35-8, 2971-36-0, 518-28-5, 79-94-7, 67227-56-9	14	564	1103	0.98	1	1	0.9411
CTD_CHEMICALS_DISEASES	Glomerulonephritis	4	5.26	0.7852	33419-42-0, 79-95-8, 85-60-9, 77-09-8	25	424	2583	0.97	1	1	0.9411
CTD_CHEMICALS_DISEASES	Dermatitis, Contact	4	5.26	0.7856	16423-68-0, 129-16-8, 77-09-8, 569-57-3	25	443	2583	0.93	1	1	0.9411
CTD_CHEMICALS_DISEASES	Psoriasis	4	5.26	0.786	68392-35-8, 1565-94-2, 2971-36-0, 16423-68-0	25	448	2583	0.92	1	1	0.9411
CTD_CHEMICALS_DISEASES	Brain Ischemia	4	5.26	0.7869	16423-68-0, 2971-36-0, 30299-08-2, 518-28-5	25	456	2583	0.91	1	1	0.9417
CTD_GOSLIM_BIOPROCESS	GO:0006259|DNA metabolic process	6	7.89	0.7876	80-05-7, 79-94-7, 518-28-5, 68392-35-8, 72-43-5, 33419-42-0	16	465	1491	1.2	1	1	0.9419
CTD_CHEMICALS_GOENRICH_CELLCOMP	GO:0005886|plasma membrane	8	10.53	0.7888	518-28-5, 79-94-7, 2971-36-0, 68392-35-8, 72-43-5, 33419-42-0, 143-74-8, 67227-56-9	14	550	1103	1.15	1	1	0.9422
CTD_CHEMICALS_GOENRICH_CELLCOMP	GO:0031982|vesicle	8	10.53	0.7888	79-94-7, 518-28-5, 2971-36-0, 68392-35-8, 72-43-5, 33419-42-0, 143-74-8, 67227-56-9	14	550	1103	1.15	1	1	0.9422
CTD_GOSLIM_BIOPROCESS	GO:0006810|transport	10	13.16	0.7908	72-43-5, 68392-35-8, 2971-36-0, 518-28-5, 79-94-7, 80-05-7, 33419-42-0, 79-95-8, 67227-56-9, 143-74-8	16	950	1491	0.98	1	1	0.9435
CTD_CHEMICALS_DISEASES	Endometriosis	6	7.89	0.7916	16423-68-0, 31477-60-8, 67227-56-9, 29767-20-2, 2971-36-0, 68392-35-8	25	480	2583	1.29	1	1	0.9435
HTS_STRONGACTIVE	autofluorescence:tox21-spec-hepg2-p1_autofluor@blue_2	5	6.58	0.7926	15905-32-5, 129-16-8, 61445-50-9, 518-28-5, 15086-94-9	61	312	4870	1.28	1	1	0.9435
HTS_STRONGACTIVE	cytotoxicity:tox21-rt-viability-hepg2-p1_viability@glo_32h_1	5	6.58	0.7926	68392-35-8, 85-60-9, 1565-94-2, 4221-68-5, 518-47-8	61	312	4870	1.28	1	1	0.9435
CTD_GOSLIM_BIOPROCESS	GO:0055085|transmembrane transport	6	7.89	0.793	79-94-7, 518-28-5, 72-43-5, 33419-42-0, 68392-35-8, 80-05-7	16	582	1491	0.96	1	1	0.9435
CTD_GOSLIM_BIOPROCESS	GO:0040007|growth	8	10.53	0.7931	68392-35-8, 33419-42-0, 79-95-8, 72-43-5, 79-94-7, 518-28-5, 2971-36-0, 80-05-7	16	612	1491	1.22	1	1	0.9435
HTS_STRONGACTIVE	counter screen (cell viability):tox21-are-bla-p1_viability_1	5	6.58	0.7932	4162-45-2, 85-60-9, 68392-35-8, 68047-06-3, 3236-71-3	61	313	4870	1.28	1	1	0.9435
HTS_STRONGACTIVE	cytotoxicity:tox21-rt-viability-hepg2-p1_viability@glo_24h_1	5	6.58	0.7945	4221-68-5, 1565-94-2, 518-47-8, 68392-35-8, 85-60-9	61	315	4870	1.27	1	1	0.9444
CTD_GOSLIM_BIOPROCESS	GO:0007155|cell adhesion	8	10.53	0.7951	67227-56-9, 80-05-7, 2971-36-0, 518-28-5, 79-94-7, 72-43-5, 33419-42-0, 68392-35-8	16	627	1491	1.19	1	1	0.9445
CTD_GOSLIM_BIOPROCESS	GO:0007267|cell-cell signaling	8	10.53	0.7977	33419-42-0, 79-95-8, 80-05-7, 518-28-5, 79-94-7, 2971-36-0, 68392-35-8, 72-43-5	16	770	1491	0.97	1	1	0.9471
CTD_CHEMICALS_DISEASES	Liver Cirrhosis	6	7.89	0.7991	143-74-8, 16423-68-0, 67227-56-9, 79-94-7, 2971-36-0, 68392-35-8	25	505	2583	1.23	1	1	0.9479
CTD_GOSLIM_BIOPROCESS	GO:0048870|cell motility	8	10.53	0.7994	80-05-7, 72-43-5, 68392-35-8, 2971-36-0, 79-94-7, 518-28-5, 67227-56-9, 33419-42-0	16	760	1491	0.98	1	1	0.9479
CTD_CHEMICALS_DISEASES	Heart Failure	5	6.58	0.8023	16423-68-0, 67227-56-9, 80-05-7, 68392-35-8, 30299-08-2	25	527	2583	0.98	1	1	0.9502
MULTICASE_TOX_PREDICTION	ARE activation in keratinocytes at 100uM	27	35.53	0.8027	3236-71-3, 5613-46-7, 29767-20-2, 79-94-7, 115-39-9, 517-28-2, 15905-32-5, 15086-94-9, 13473-26-2, 118-82-1, 21850-44-2, 6559-91-7, 52479-85-3, 4162-45-2, 25327-89-3, 68392-35-8, 33419-42-0, 117091-64-2, 518-28-5, 139233-53-7, 67227-56-9, 76-60-8, 31127-54-5, 68047-06-3, 1260-17-9, 71-67-0, 79-95-8	67	3252	7882	0.98	1	1	0.9502
CTD_CHEMICALS_DISEASES	Nervous System Diseases	5	6.58	0.8029	79-94-7, 1565-94-2, 518-28-5, 77-09-8, 2624-43-3	25	518	2583	1	1	1	0.9502
HTS_STRONGACTIVE	energy homeostasis:tox21-err-p1_err-antagonist_1	6	7.89	0.8032	569-57-3, 33419-42-0, 4162-45-2, 79-97-0, 2971-36-0, 1565-94-2	61	366	4870	1.31	1	1	0.9502
TOXCAST_ACTIVE	ATG_NRF2_ARE_CIS_up	9	11.84	0.8084	80-05-7, 68392-35-8, 72-43-5, 79-94-7, 115-39-9, 77-40-7, 77-09-8, 81-90-3, 1478-61-1	18	733	1694	1.16	1	1	0.9557
HTS_ACTIVE	energy homeostasis:tox21-pgc-err-p1_pgc-err-agonist_1	6	7.89	0.8145	131-55-5, 131-54-4, 611-99-4, 68047-06-3, 518-28-5, 33419-42-0	68	472	6512	1.22	1	1	0.9624
TOXPRINT_STRUCTURE	bond:S=O_sulfonyl_generic	7	9.21	0.8235	125-31-5, 76-60-8, 143-74-8, 10040-45-6, 71-67-0, 115-39-9, 34487-61-1	67	696	8195	1.23	1	1	0.9725
CTD_CHEMICALS_DISEASES	Liver Cirrhosis, Experimental	8	10.53	0.8286	16423-68-0, 29767-20-2, 68392-35-8, 77-09-8, 143-74-8, 129-16-8, 79-95-8, 33419-42-0	25	856	2583	0.97	1	1	0.9778
LEADSCOPE_TOXICITY	Human Adverse Cardiological Effects: palpitations	6	7.89	0.8307	31477-60-8, 67227-56-9, 85-60-9, 1565-94-2, 4162-45-2, 79-95-8	66	675	7259	0.98	1	1	0.9798
LEADSCOPE_TOXICITY	Human Adverse Cardiological Effects: bradycardia	8	10.53	0.8354	34487-61-1, 5613-46-7, 4162-45-2, 125-31-5, 1565-94-2, 67227-56-9, 139233-53-7, 143-74-8	66	733	7259	1.2	1	1	0.9847
LEADSCOPE_TOXICITY	Developmental Toxicity: post impl. loss rodent	8	10.53	0.8392	6559-91-7, 33419-42-0, 72-43-5, 518-28-5, 2971-36-0, 117091-64-2, 29767-20-2, 14868-03-2	66	756	7259	1.16	1	1	0.9885
LEADSCOPE_TOXICITY	Reproductive Toxicity: sperm mouse	7	9.21	0.8419	41351-30-8, 34487-61-1, 1260-17-9, 31127-54-5, 52479-85-3, 61445-50-9, 30299-08-2	66	798	7259	0.96	1	1	0.9911
HTS_ACTIVE	energy homeostasis:tox21-err-p1_err-antagonist_1	8	10.53	0.8507	72-43-5, 79-94-7, 2971-36-0, 569-57-3, 79-97-0, 33419-42-0, 4162-45-2, 1565-94-2	68	789	6512	0.97	1	1	1
LEADSCOPE_TOXICITY	Reproductive Toxicity: sperm rodent	8	10.53	0.8507	517-28-2, 115-39-9, 25327-89-3, 34487-61-1, 38103-06-9, 3236-71-3, 76-60-8, 21850-44-2	66	914	7259	0.96	1	1	1
TOXPRINT_STRUCTURE	chain:alkaneLinear_ethyl_C2_(connect_noZ_CN=4)	20	26.32	0.8935	4162-45-2, 79-97-0, 21850-44-2, 27955-94-8, 30299-08-2, 6807-17-6, 1565-94-2, 118-82-1, 85-60-9, 126-00-1, 77-40-7, 79-94-7, 80-05-7, 5613-46-7, 79-95-8, 22345-47-7, 68392-35-8, 68047-06-3, 25327-89-3, 38103-06-9	67	2449	8195	1	1	1	1
MESH	Heterocyclic Compounds, 2-Ring	5	6.58	1	67227-56-9, 517-28-2, 125-13-3, 22345-47-7, 115-33-3	42	587	5355	1.09	1	1	1
MESH	Sulfones	2	2.63	1	115-39-9, 76-60-8	42	143	5355	1.78	1	1	1
MODE_CLASS	Enzyme Inhibitor	4	5.26	1	33419-42-0, 518-28-5, 117091-64-2, 29767-20-2	10	457	1476	1.29	1	1	1
CTD_CHEMICALS_DISEASES	Brain Injuries, Traumatic	3	3.95	1	80-05-7, 143-74-8, 518-28-5	25	230	2583	1.35	1	1	1
CTD_CHEMICALS_DISEASES	Cell Transformation, Neoplastic	6	7.89	1	30299-08-2, 1565-94-2, 16423-68-0, 2624-43-3, 77-09-8, 85-60-9	25	599	2583	1.03	1	1	1
CTD_CHEMICALS_DISEASES	Cerebral Hemorrhage	3	3.95	1	518-28-5, 569-57-3, 80-05-7	25	247	2583	1.25	1	1	1
CTD_CHEMICALS_DISEASES	Cholestasis	5	6.58	1	68392-35-8, 1565-94-2, 30299-08-2, 29767-20-2, 143-74-8	25	433	2583	1.19	1	1	1
CTD_CHEMICALS_DISEASES	Cocaine-Related Disorders	4	5.26	1	79-95-8, 29767-20-2, 79-94-7, 1565-94-2	25	319	2583	1.3	1	1	1
CTD_CHEMICALS_DISEASES	Diabetes, Gestational	3	3.95	1	16423-68-0, 2971-36-0, 29767-20-2	25	251	2583	1.23	1	1	1
CTD_CHEMICALS_DISEASES	HIV Infections	3	3.95	1	29767-20-2, 67227-56-9, 2971-36-0	25	290	2583	1.07	1	1	1
CTD_CHEMICALS_DISEASES	Hypospadias 1, X-Linked	2	2.63	1	79-95-8, 29767-20-2	25	171	2583	1.21	1	1	1
CTD_CHEMICALS_DISEASES	Ischemia	4	5.26	1	33419-42-0, 30299-08-2, 2971-36-0, 80-05-7	25	324	2583	1.28	1	1	1
CTD_CHEMICALS_DISEASES	Myocardial Infarction	6	7.89	1	518-28-5, 30299-08-2, 2971-36-0, 85-60-9, 29767-20-2, 77-09-8	25	536	2583	1.16	1	1	1
CTD_CHEMICALS_DISEASES	Neurodevelopmental Disorders	2	2.63	1	143-74-8, 79-94-7	25	103	2583	2.01	1	1	1
CTD_CHEMICALS_DISEASES	Plaque, Atherosclerotic	2	2.63	1	77-09-8, 518-28-5	25	138	2583	1.5	1	1	1
CTD_CHEMICALS_DISEASES	Thrombosis	3	3.95	1	569-57-3, 67227-56-9, 72-43-5	25	300	2583	1.03	1	1	1
CTD_CHEMICALS_GENES	BAX	2	2.63	1	33419-42-0, 72-43-5	22	143	2273	1.45	1	1	1
CTD_CHEMICALS_GENES	NR1I2	2	2.63	1	72-43-5, 77-09-8	22	157	2273	1.32	1	1	1
CTD_CHEMICALS_PATHWAYS	KEGG:hsa04024|cAMP signaling pathway	2	2.63	1	72-43-5, 80-05-7	12	138	939	1.13	1	1	1
CTD_CHEMICALS_PATHWAYS	KEGG:hsa04060|Cytokine-cytokine receptor interaction	4	5.26	1	72-43-5, 79-94-7, 2971-36-0, 80-05-7	12	254	939	1.23	1	1	1
CTD_CHEMICALS_PATHWAYS	KEGG:hsa04668|TNF signaling pathway	5	6.58	1	68392-35-8, 33419-42-0, 72-43-5, 518-28-5, 79-94-7	12	327	939	1.2	1	1	1
CTD_CHEMICALS_PATHWAYS	KEGG:hsa05152|Tuberculosis	5	6.58	1	72-43-5, 33419-42-0, 2971-36-0, 79-94-7, 518-28-5	12	323	939	1.21	1	1	1
CTD_CHEMICALS_PATHWAYS	REACT:R-HSA-112412|SOS-mediated signalling	2	2.63	1	80-05-7, 68392-35-8	12	84	939	1.86	1	1	1
CTD_CHEMICALS_PATHWAYS	REACT:R-HSA-1280218|Adaptive Immune System	5	6.58	1	79-94-7, 518-28-5, 2971-36-0, 68392-35-8, 33419-42-0	12	319	939	1.23	1	1	1
CTD_CHEMICALS_PATHWAYS	REACT:R-HSA-169893|Prolonged ERK activation events	2	2.63	1	68392-35-8, 80-05-7	12	97	939	1.61	1	1	1
CTD_CHEMICALS_PATHWAYS	REACT:R-HSA-2404192|Signaling by Type 1 Insulin-like Growth Factor 1 Receptor (IGF1R)	3	3.95	1	68392-35-8, 72-43-5, 80-05-7	12	178	939	1.32	1	1	1
CTD_CHEMICALS_PATHWAYS	REACT:R-HSA-5673001|RAF/MAP kinase cascade	2	2.63	1	68392-35-8, 80-05-7	12	84	939	1.86	1	1	1
CTD_CHEMICALS_PATHWAYS	REACT:R-HSA-6785807|Interleukin-4 and 13 signaling	5	6.58	1	68392-35-8, 33419-42-0, 72-43-5, 518-28-5, 79-94-7	12	388	939	1.01	1	1	1
CTD_CHEMICALS_GOENRICH_MOLFUNCT	GO:0003824|catalytic activity	9	11.84	1	33419-42-0, 72-43-5, 68392-35-8, 2971-36-0, 79-94-7, 518-28-5, 1565-94-2, 67227-56-9, 16423-68-0	14	684	1090	1.02	1	1	1
CTD_CHEMICALS_GOENRICH_MOLFUNCT	GO:0008134|transcription factor binding	6	7.89	1	33419-42-0, 72-43-5, 68392-35-8, 2971-36-0, 79-94-7, 518-28-5	14	414	1090	1.13	1	1	1
CTD_CHEMICALS_GOENRICH_MOLFUNCT	GO:0008270|zinc ion binding	4	5.26	1	79-95-8, 33419-42-0, 68392-35-8, 518-28-5	14	259	1090	1.2	1	1	1
CTD_CHEMICALS_GOENRICH_MOLFUNCT	GO:0016301|kinase activity	5	6.58	1	518-28-5, 79-94-7, 33419-42-0, 72-43-5, 68392-35-8	14	317	1090	1.23	1	1	1
CTD_CHEMICALS_GOENRICH_MOLFUNCT	GO:0046873|metal ion transmembrane transporter activity	2	2.63	1	80-05-7, 72-43-5	14	82	1090	1.9	1	1	1
CTD_CHEMICALS_GOENRICH_MOLFUNCT	GO:0070851|growth factor receptor binding	2	2.63	1	79-94-7, 80-05-7	14	90	1090	1.73	1	1	1
CTD_CHEMICALS_GOENRICH_CELLCOMP	GO:0005887|integral component of plasma membrane	5	6.58	1	72-43-5, 33419-42-0, 68392-35-8, 518-28-5, 79-94-7	14	339	1103	1.16	1	1	1
CTD_CHEMICALS_GOENRICH_CELLCOMP	GO:0031226|intrinsic component of plasma membrane	5	6.58	1	79-94-7, 518-28-5, 72-43-5, 33419-42-0, 68392-35-8	14	339	1103	1.16	1	1	1
CTD_CHEMICALS_GOENRICH_CELLCOMP	GO:0044421|extracellular region part	7	9.21	1	2971-36-0, 79-94-7, 518-28-5, 33419-42-0, 72-43-5, 68392-35-8, 67227-56-9	14	544	1103	1.01	1	1	1
CTD_CHEMICALS_GOENRICH_CELLCOMP	GO:0044431|Golgi apparatus part	2	2.63	1	67227-56-9, 79-94-7	14	120	1103	1.31	1	1	1
CTD_CHEMICALS_GOENRICH_CELLCOMP	GO:0071944|cell periphery	8	10.53	1	67227-56-9, 143-74-8, 72-43-5, 33419-42-0, 68392-35-8, 2971-36-0, 518-28-5, 79-94-7	14	569	1103	1.11	1	1	1
CTD_CHEMICALS_GOENRICH_CELLCOMP	GO:0098552|side of membrane	3	3.95	1	80-05-7, 518-28-5, 33419-42-0	14	226	1103	1.05	1	1	1
CTD_CHEMICALS_GOENRICH_CELLCOMP	GO:0098793|presynapse	2	2.63	1	72-43-5, 80-05-7	14	102	1103	1.54	1	1	1
CTD_CHEMICALS_GOENRICH_CELLCOMP	GO:0099080|supramolecular complex	3	3.95	1	518-28-5, 143-74-8, 33419-42-0	14	159	1103	1.49	1	1	1
CTD_GOSLIM_BIOPROCESS	GO:0006091|generation of precursor metabolites and energy	6	7.89	1	80-05-7, 79-94-7, 518-28-5, 68392-35-8, 72-43-5, 33419-42-0	16	480	1491	1.16	1	1	1
CTD_GOSLIM_BIOPROCESS	GO:0006914|autophagy	5	6.58	1	79-94-7, 518-28-5, 33419-42-0, 72-43-5, 80-05-7	16	414	1491	1.13	1	1	1
CTD_GOSLIM_BIOPROCESS	GO:0007165|signal transduction	11	14.47	1	67227-56-9, 143-74-8, 1565-94-2, 33419-42-0, 79-95-8, 80-05-7, 2971-36-0, 79-94-7, 518-28-5, 72-43-5, 68392-35-8	16	999	1491	1.03	1	1	1
CTD_GOSLIM_BIOPROCESS	GO:0034641|cellular nitrogen compound metabolic process	10	13.16	1	1565-94-2, 33419-42-0, 79-95-8, 80-05-7, 29767-20-2, 2971-36-0, 518-28-5, 79-94-7, 72-43-5, 68392-35-8	16	887	1491	1.05	1	1	1
TOXINS_TARGETS	CYP3A4	3	3.95	1	72-43-5, 80-05-7, 2971-36-0	14	203	1220	1.29	1	1	1
TOXCAST_ACTIVE	APR_HepG2_StressKinase_72h_up	2	2.63	1	77-09-8, 77-40-7	18	96	1694	1.96	1	1	1
TOXCAST_ACTIVE	ATG_NFI_CIS_up	2	2.63	1	79-94-7, 77-09-8	18	175	1694	1.08	1	1	1
HTS_ACTIVE	sex hormone homeostasis:tox21-ar-mda-kb2-luc-agonist-p3_ar-agonist_1	3	3.95	1	131-55-5, 14868-03-2, 1470-79-7	68	225	6512	1.28	1	1	1
HTS_ACTIVE	xenobiotic homeostasis:tox21-ahr-p1_ahr-agonist_1	6	7.89	1	61445-50-9, 15905-32-5, 31127-54-5, 52479-85-3, 131-55-5, 131-54-4	68	527	6512	1.09	1	1	1
HTS_ACTIVE	xenobiotic homeostasis:tox21-p450-1a2-p1_1a2-inhibitor_1	39	51.32	1	68392-35-8, 14868-03-2, 24038-68-4, 33419-42-0, 143-74-8, 4221-68-5, 77-40-7, 115-39-9, 15905-32-5, 72-43-5, 517-28-2, 5613-46-7, 3236-71-3, 34487-61-1, 118-82-1, 1565-94-2, 61445-50-9, 79-97-0, 52479-85-3, 21850-44-2, 4162-45-2, 15086-94-9, 1943-97-1, 13473-26-2, 843-55-0, 1260-17-9, 131-54-4, 38103-06-9, 131-55-5, 1470-79-7, 518-28-5, 620-92-8, 2971-36-0, 16423-68-0, 611-99-4, 76-60-8, 31127-54…	68	3697	6512	1.01	1	1	1
HTS_STRONGACTIVE	autofluorescence:tox21-spec-hek293-p1_autofluor@cell-blue-n_1	4	5.26	1	61445-50-9, 15086-94-9, 15905-32-5, 517-28-2	61	285	4870	1.12	1	1	1
MULTICASE_TOX_PREDICTION	RCA sperm toxicity, mammal	3	3.95	1	517-28-2, 61445-50-9, 31477-60-8	67	332	7882	1.06	1	1	1
LEADSCOPE_TOXICITY	Reproductive Toxicity: sperm rat	10	13.16	1	13473-26-2, 85-60-9, 118-82-1, 76-60-8, 21850-44-2, 3236-71-3, 38103-06-9, 115-39-9, 71-67-0, 517-28-2	66	1063	7259	1.03	1	1	1
MESH	Hydrocarbons, Halogenated	2	2.63	1	79-94-7, 72-43-5	42	176	5355	1.45	1	1	1
MESH	Ketones	2	2.63	1	52479-85-3, 131-55-5	42	127	5355	2.01	1	1	1
PHARMACTIONLIST	Chemical Actions and Uses	27	35.53	1	29767-20-2, 117091-64-2, 80-05-7, 517-28-2, 15905-32-5, 72-43-5, 115-39-9, 518-28-5, 115-33-3, 518-47-8, 13473-26-2, 2624-43-3, 10040-45-6, 67227-56-9, 125-13-3, 76-60-8, 603-50-9, 569-57-3, 68392-35-8, 68047-06-3, 71-67-0, 1260-17-9, 2321-07-05, 27072-45-3, 77-09-8, 143-74-8, 22345-47-7	27	2720	2720	1	1	1	1
ADVERSE_EFFECT	GIS_Nausea / Vomiting	3	3.95	1	518-47-8, 603-50-9, 125-13-3	6	379	941	1.24	1	1	1
ADVERSE_EFFECT	SKN_Pruritis	2	2.63	1	518-28-5, 33419-42-0	6	171	941	1.83	1	1	1
MODE_CLASS	Receptor Agonist	2	2.63	1	80-05-7, 67227-56-9	10	198	1476	1.49	1	1	1
PRODUCT_CLASS	Cardiovasculars	3	3.95	1	30299-08-2, 129-16-8, 67227-56-9	13	261	1571	1.39	1	1	1
DRUGBANK_ENZYMES	CYP3A4	3	3.95	1	33419-42-0, 22345-47-7, 29767-20-2	4	447	793	1.33	1	1	1
CTD_CHEMICALS_DISEASES	Acatalasia	2	2.63	1	30299-08-2, 1565-94-2	25	121	2583	1.71	1	1	1
CTD_CHEMICALS_DISEASES	Adenomatous Polyposis Coli	2	2.63	1	2971-36-0, 68392-35-8	25	134	2583	1.54	1	1	1
CTD_CHEMICALS_DISEASES	Adrenoleukodystrophy	2	2.63	1	79-94-7, 1565-94-2	25	162	2583	1.28	1	1	1
CTD_CHEMICALS_DISEASES	Alzheimer Disease	5	6.58	1	30299-08-2, 518-28-5, 79-95-8, 77-09-8, 85-60-9	25	516	2583	1	1	1	1
CTD_CHEMICALS_DISEASES	Arsenic Poisoning	3	3.95	1	33419-42-0, 79-94-7, 2971-36-0	25	269	2583	1.15	1	1	1
CTD_CHEMICALS_DISEASES	Asthma	5	6.58	1	30299-08-2, 2971-36-0, 129-16-8, 67227-56-9, 16423-68-0	25	443	2583	1.17	1	1	1
CTD_CHEMICALS_DISEASES	Atrial Fibrillation	3	3.95	1	131-55-5, 79-94-7, 29767-20-2	25	289	2583	1.07	1	1	1
CTD_CHEMICALS_DISEASES	Berylliosis	3	3.95	1	79-94-7, 72-43-5, 33419-42-0	25	225	2583	1.38	1	1	1
CTD_CHEMICALS_DISEASES	Bipolar Disorder	2	2.63	1	79-94-7, 131-55-5	25	131	2583	1.58	1	1	1
CTD_CHEMICALS_DISEASES	Birth Weight	2	2.63	1	79-95-8, 131-55-5	25	137	2583	1.51	1	1	1
CTD_CHEMICALS_DISEASES	Bone Resorption	2	2.63	1	68392-35-8, 2971-36-0	25	133	2583	1.55	1	1	1
CTD_CHEMICALS_DISEASES	Burns	2	2.63	1	143-74-8, 72-43-5	25	136	2583	1.52	1	1	1
CTD_CHEMICALS_DISEASES	Cachexia	2	2.63	1	68392-35-8, 2971-36-0	25	177	2583	1.17	1	1	1
CTD_CHEMICALS_DISEASES	Carcinoma, Ovarian Epithelial	2	2.63	1	80-05-7, 33419-42-0	25	136	2583	1.52	1	1	1
CTD_CHEMICALS_DISEASES	Carcinoma, Renal Cell	4	5.26	1	77-09-8, 569-57-3, 2624-43-3, 129-16-8	25	389	2583	1.06	1	1	1
CTD_CHEMICALS_DISEASES	Chromosome Breakage	2	2.63	1	33419-42-0, 30299-08-2	25	141	2583	1.47	1	1	1
CTD_CHEMICALS_DISEASES	Colitis	3	3.95	1	2971-36-0, 80-05-7, 33419-42-0	25	293	2583	1.06	1	1	1
CTD_CHEMICALS_DISEASES	Colonic Neoplasms	6	7.89	1	518-28-5, 1565-94-2, 30299-08-2, 77-09-8, 67227-56-9, 29767-20-2	25	524	2583	1.18	1	1	1
CTD_CHEMICALS_DISEASES	Coronavirus Infections	3	3.95	1	2971-36-0, 33419-42-0, 68392-35-8	25	213	2583	1.46	1	1	1
CTD_CHEMICALS_DISEASES	Craniofacial Abnormalities	2	2.63	1	131-55-5, 33419-42-0	25	159	2583	1.3	1	1	1
CTD_CHEMICALS_DISEASES	Dermatitis, Allergic Contact	4	5.26	1	80-05-7, 1565-94-2, 68392-35-8, 33419-42-0	25	389	2583	1.06	1	1	1
CTD_CHEMICALS_DISEASES	Diabetes Mellitus, Experimental	6	7.89	1	67227-56-9, 79-95-8, 72-43-5, 518-28-5, 79-94-7, 30299-08-2	25	594	2583	1.04	1	1	1
CTD_CHEMICALS_DISEASES	Drug Hypersensitivity	3	3.95	1	77-09-8, 569-57-3, 72-43-5	25	213	2583	1.46	1	1	1
CTD_CHEMICALS_DISEASES	Drug-Related Side Effects and Adverse Reactions	6	7.89	1	77-09-8, 16423-68-0, 1565-94-2, 79-94-7, 2971-36-0, 30299-08-2	25	593	2583	1.05	1	1	1
CTD_CHEMICALS_DISEASES	Enterocolitis, Necrotizing	2	2.63	1	67227-56-9, 80-05-7	25	169	2583	1.22	1	1	1
CTD_CHEMICALS_DISEASES	Fatty Liver	6	7.89	1	77-09-8, 29767-20-2, 1565-94-2, 518-28-5, 30299-08-2, 2971-36-0	25	584	2583	1.06	1	1	1
CTD_CHEMICALS_DISEASES	Fatty Liver, Alcoholic	2	2.63	1	30299-08-2, 80-05-7	25	137	2583	1.51	1	1	1
CTD_CHEMICALS_DISEASES	Gallbladder Neoplasms	2	2.63	1	79-94-7, 2971-36-0	25	181	2583	1.14	1	1	1
CTD_CHEMICALS_DISEASES	Gliosarcoma	2	2.63	1	16423-68-0, 77-09-8	25	118	2583	1.75	1	1	1
CTD_CHEMICALS_DISEASES	Gliosis	2	2.63	1	2971-36-0, 29767-20-2	25	199	2583	1.04	1	1	1
CTD_CHEMICALS_DISEASES	Glomerulosclerosis, Focal Segmental	2	2.63	1	33419-42-0, 67227-56-9	25	146	2583	1.42	1	1	1
CTD_CHEMICALS_DISEASES	Heart Defects, Congenital	2	2.63	1	79-94-7, 16423-68-0	25	148	2583	1.4	1	1	1
CTD_CHEMICALS_DISEASES	Hepatitis	2	2.63	1	115-33-3, 1565-94-2	25	195	2583	1.06	1	1	1
CTD_CHEMICALS_DISEASES	Hepatitis, Alcoholic	3	3.95	1	68392-35-8, 79-94-7, 2971-36-0	25	231	2583	1.34	1	1	1
CTD_CHEMICALS_DISEASES	Hernias, Diaphragmatic, Congenital	2	2.63	1	2971-36-0, 33419-42-0	25	131	2583	1.58	1	1	1
CTD_CHEMICALS_DISEASES	Hyperalgesia	4	5.26	1	33419-42-0, 68392-35-8, 2971-36-0, 1565-94-2	25	411	2583	1.01	1	1	1
CTD_CHEMICALS_DISEASES	Hyperoxia	3	3.95	1	131-55-5, 68392-35-8, 72-43-5	25	216	2583	1.44	1	1	1
CTD_CHEMICALS_DISEASES	Hypertrophy, Left Ventricular	2	2.63	1	33419-42-0, 68392-35-8	25	172	2583	1.2	1	1	1
CTD_CHEMICALS_DISEASES	Hypogonadism	2	2.63	1	16423-68-0, 131-55-5	25	155	2583	1.33	1	1	1
CTD_CHEMICALS_DISEASES	Infertility, Male	5	6.58	1	68392-35-8, 79-94-7, 518-28-5, 29767-20-2, 77-09-8	25	478	2583	1.08	1	1	1
CTD_CHEMICALS_DISEASES	Leishmaniasis	2	2.63	1	72-43-5, 79-94-7	25	203	2583	1.02	1	1	1
CTD_CHEMICALS_DISEASES	Leishmaniasis, Visceral	3	3.95	1	2971-36-0, 72-43-5, 33419-42-0	25	266	2583	1.17	1	1	1
CTD_CHEMICALS_DISEASES	Leukemia	4	5.26	1	85-60-9, 29767-20-2, 77-09-8, 2971-36-0	25	355	2583	1.16	1	1	1
CTD_CHEMICALS_DISEASES	Lung Neoplasms	8	10.53	1	68392-35-8, 569-57-3, 16423-68-0, 33419-42-0, 85-60-9, 143-74-8, 77-09-8, 129-16-8	25	761	2583	1.09	1	1	1
CTD_CHEMICALS_DISEASES	Lymphoma, T-Cell	3	3.95	1	30299-08-2, 33419-42-0, 79-95-8	25	218	2583	1.42	1	1	1
CTD_CHEMICALS_DISEASES	Macular Degeneration	2	2.63	1	2971-36-0, 131-55-5	25	127	2583	1.63	1	1	1
CTD_CHEMICALS_DISEASES	Marfan Syndrome	3	3.95	1	33419-42-0, 1565-94-2, 30299-08-2	25	246	2583	1.26	1	1	1
CTD_CHEMICALS_DISEASES	Medulloblastoma	2	2.63	1	131-55-5, 29767-20-2	25	163	2583	1.27	1	1	1
CTD_CHEMICALS_DISEASES	Metabolism, Inborn Errors	2	2.63	1	2624-43-3, 1565-94-2	25	133	2583	1.55	1	1	1
CTD_CHEMICALS_DISEASES	Migraine Disorders	2	2.63	1	85-60-9, 77-09-8	25	126	2583	1.64	1	1	1
CTD_CHEMICALS_DISEASES	MYCOBACTERIUM TUBERCULOSIS, SUSCEPTIBILITY TO	2	2.63	1	67227-56-9, 68392-35-8	25	141	2583	1.47	1	1	1
CTD_CHEMICALS_DISEASES	Mycoplasma Infections	2	2.63	1	518-28-5, 1565-94-2	25	202	2583	1.02	1	1	1
CTD_CHEMICALS_DISEASES	Nasopharyngeal Carcinoma	2	2.63	1	72-43-5, 16423-68-0	25	163	2583	1.27	1	1	1
CTD_CHEMICALS_DISEASES	Nephrosclerosis	2	2.63	1	29767-20-2, 72-43-5	25	121	2583	1.71	1	1	1
CTD_CHEMICALS_DISEASES	Nerve Degeneration	4	5.26	1	143-74-8, 1565-94-2, 518-28-5, 68392-35-8	25	401	2583	1.03	1	1	1
CTD_CHEMICALS_DISEASES	Neurogenic Inflammation	3	3.95	1	33419-42-0, 72-43-5, 1565-94-2	25	245	2583	1.27	1	1	1
CTD_CHEMICALS_DISEASES	Osteolysis	2	2.63	1	2971-36-0, 79-94-7	25	117	2583	1.77	1	1	1
CTD_CHEMICALS_DISEASES	Osteosarcoma	5	6.58	1	77-09-8, 569-57-3, 129-16-8, 80-05-7, 131-55-5	25	452	2583	1.14	1	1	1
CTD_CHEMICALS_DISEASES	Pancreatic Neoplasms	5	6.58	1	77-09-8, 143-74-8, 67227-56-9, 131-55-5, 30299-08-2	25	487	2583	1.06	1	1	1
CTD_CHEMICALS_DISEASES	Phobic Disorders	2	2.63	1	1565-94-2, 30299-08-2	25	122	2583	1.69	1	1	1
CTD_CHEMICALS_DISEASES	Prostatic Neoplasms, Castration-Resistant	2	2.63	1	29767-20-2, 77-09-8	25	152	2583	1.36	1	1	1
CTD_CHEMICALS_DISEASES	Renal Insufficiency	2	2.63	1	30299-08-2, 80-05-7	25	129	2583	1.6	1	1	1
CTD_CHEMICALS_DISEASES	Severe Acute Respiratory Syndrome	3	3.95	1	143-74-8, 33419-42-0, 68392-35-8	25	280	2583	1.11	1	1	1
CTD_CHEMICALS_DISEASES	Skin Diseases	4	5.26	1	68392-35-8, 33419-42-0, 143-74-8, 1565-94-2	25	339	2583	1.22	1	1	1
CTD_CHEMICALS_DISEASES	Small Cell Lung Carcinoma	2	2.63	1	79-94-7, 68392-35-8	25	165	2583	1.25	1	1	1
CTD_CHEMICALS_DISEASES	Spinal Cord Injuries	3	3.95	1	79-94-7, 518-28-5, 68392-35-8	25	295	2583	1.05	1	1	1
CTD_CHEMICALS_DISEASES	Spinocerebellar Ataxia 17	3	3.95	1	1565-94-2, 79-94-7, 79-95-8	25	239	2583	1.3	1	1	1
CTD_CHEMICALS_DISEASES	Status Epilepticus	5	6.58	1	518-28-5, 30299-08-2, 68392-35-8, 143-74-8, 16423-68-0	25	448	2583	1.15	1	1	1
CTD_CHEMICALS_DISEASES	TOBACCO ADDICTION, SUSCEPTIBILITY TO	2	2.63	1	79-95-8, 68392-35-8	25	147	2583	1.41	1	1	1
CTD_CHEMICALS_DISEASES	Tongue Neoplasms	2	2.63	1	77-09-8, 33419-42-0	25	196	2583	1.05	1	1	1
CTD_CHEMICALS_DISEASES	Turner Syndrome	3	3.95	1	67227-56-9, 30299-08-2, 1565-94-2	25	268	2583	1.16	1	1	1
CTD_CHEMICALS_DISEASES	Uremia	2	2.63	1	68392-35-8, 33419-42-0	25	152	2583	1.36	1	1	1
CTD_CHEMICALS_DISEASES	Ureteral Obstruction	3	3.95	1	80-05-7, 143-74-8, 79-94-7	25	241	2583	1.29	1	1	1
CTD_CHEMICALS_DISEASES	Urinary Bladder Neoplasms	7	9.21	1	85-60-9, 569-57-3, 143-74-8, 16423-68-0, 129-16-8, 131-55-5, 79-95-8	25	670	2583	1.08	1	1	1
CTD_CHEMICALS_DISEASES	Vulvar Lichen Sclerosus	2	2.63	1	33419-42-0, 16423-68-0	25	120	2583	1.72	1	1	1
CTD_CHEMICALS_GENES	CASP9	2	2.63	1	518-28-5, 33419-42-0	22	112	2273	1.84	1	1	1
CTD_CHEMICALS_GENES	CDKN1A	2	2.63	1	29767-20-2, 33419-42-0	22	110	2273	1.88	1	1	1
CTD_CHEMICALS_GENES	HMOX1	2	2.63	1	1565-94-2, 79-94-7	22	177	2273	1.17	1	1	1
CTD_CHEMICALS_GENES	NR1I3	2	2.63	1	72-43-5, 77-09-8	22	121	2273	1.71	1	1	1
CTD_CHEMICALS_GENES	PTGS2	2	2.63	1	79-94-7, 1565-94-2	22	171	2273	1.21	1	1	1
CTD_CHEMICALS_GENES	TP53	2	2.63	1	16423-68-0, 33419-42-0	22	141	2273	1.47	1	1	1
CTD_CHEMICALS_PATHWAYS	KEGG:hsa00980|Metabolism of xenobiotics by cytochrome P450	2	2.63	1	518-28-5, 33419-42-0	12	109	939	1.44	1	1	1
CTD_CHEMICALS_PATHWAYS	KEGG:hsa04064|NF-kappa B signaling pathway	2	2.63	1	518-28-5, 33419-42-0	12	108	939	1.45	1	1	1
CTD_CHEMICALS_PATHWAYS	KEGG:hsa04071|Sphingolipid signaling pathway	2	2.63	1	68392-35-8, 72-43-5	12	94	939	1.66	1	1	1
CTD_CHEMICALS_PATHWAYS	KEGG:hsa04115|p53 signaling pathway	3	3.95	1	33419-42-0, 518-28-5, 79-94-7	12	165	939	1.42	1	1	1
CTD_CHEMICALS_PATHWAYS	KEGG:hsa04621|NOD-like receptor signaling pathway	3	3.95	1	33419-42-0, 518-28-5, 79-94-7	12	231	939	1.02	1	1	1
CTD_CHEMICALS_PATHWAYS	KEGG:hsa04657|IL-17 signaling pathway	4	5.26	1	518-28-5, 79-94-7, 72-43-5, 33419-42-0	12	301	939	1.04	1	1	1
CTD_CHEMICALS_PATHWAYS	KEGG:hsa04932|Non-alcoholic fatty liver disease (NAFLD)	4	5.26	1	79-94-7, 518-28-5, 33419-42-0, 72-43-5	12	261	939	1.2	1	1	1
CTD_CHEMICALS_PATHWAYS	KEGG:hsa05014|Amyotrophic lateral sclerosis (ALS)	2	2.63	1	518-28-5, 33419-42-0	12	80	939	1.96	1	1	1
CTD_CHEMICALS_PATHWAYS	KEGG:hsa05161|Hepatitis B	6	7.89	1	68392-35-8, 33419-42-0, 72-43-5, 79-94-7, 518-28-5, 2971-36-0	12	410	939	1.15	1	1	1
CTD_CHEMICALS_PATHWAYS	KEGG:hsa05168|Herpes simplex infection	3	3.95	1	79-94-7, 518-28-5, 33419-42-0	12	194	939	1.21	1	1	1
CTD_CHEMICALS_PATHWAYS	KEGG:hsa05202|Transcriptional misregulation in cancer	3	3.95	1	79-94-7, 518-28-5, 33419-42-0	12	170	939	1.38	1	1	1
CTD_CHEMICALS_PATHWAYS	KEGG:hsa05204|Chemical carcinogenesis	2	2.63	1	518-28-5, 33419-42-0	12	121	939	1.29	1	1	1
CTD_CHEMICALS_PATHWAYS	KEGG:hsa05206|MicroRNAs in cancer	4	5.26	1	33419-42-0, 2971-36-0, 518-28-5, 79-94-7	12	248	939	1.26	1	1	1
CTD_CHEMICALS_PATHWAYS	KEGG:hsa05222|Small cell lung cancer	2	2.63	1	518-28-5, 33419-42-0	12	150	939	1.04	1	1	1
CTD_CHEMICALS_PATHWAYS	KEGG:hsa05418|Fluid shear stress and atherosclerosis	5	6.58	1	79-94-7, 518-28-5, 72-43-5, 33419-42-0, 68392-35-8	12	385	939	1.02	1	1	1
CTD_CHEMICALS_PATHWAYS	REACT:R-HSA-109581|Apoptosis	3	3.95	1	518-28-5, 72-43-5, 33419-42-0	12	195	939	1.2	1	1	1
CTD_CHEMICALS_PATHWAYS	REACT:R-HSA-109582|Hemostasis	6	7.89	1	33419-42-0, 72-43-5, 68392-35-8, 2971-36-0, 79-94-7, 518-28-5	12	417	939	1.13	1	1	1
CTD_CHEMICALS_PATHWAYS	REACT:R-HSA-112316|Neuronal System	2	2.63	1	72-43-5, 80-05-7	12	95	939	1.65	1	1	1
CTD_CHEMICALS_PATHWAYS	REACT:R-HSA-1430728|Metabolism	9	11.84	1	2971-36-0, 518-28-5, 79-94-7, 72-43-5, 79-95-8, 33419-42-0, 68392-35-8, 16423-68-0, 29767-20-2	12	666	939	1.06	1	1	1
CTD_CHEMICALS_PATHWAYS	REACT:R-HSA-1474244|Extracellular matrix organization	3	3.95	1	79-94-7, 80-05-7, 67227-56-9	12	163	939	1.44	1	1	1
CTD_CHEMICALS_PATHWAYS	REACT:R-HSA-162582|Signal Transduction	9	11.84	1	143-74-8, 67227-56-9, 79-94-7, 518-28-5, 2971-36-0, 68392-35-8, 72-43-5, 79-95-8, 33419-42-0	12	682	939	1.03	1	1	1
CTD_CHEMICALS_PATHWAYS	REACT:R-HSA-1640170|Cell Cycle	4	5.26	1	68392-35-8, 33419-42-0, 518-28-5, 2971-36-0	12	245	939	1.28	1	1	1
CTD_CHEMICALS_PATHWAYS	REACT:R-HSA-167044|Signalling to RAS	2	2.63	1	80-05-7, 68392-35-8	12	109	939	1.44	1	1	1
CTD_CHEMICALS_PATHWAYS	REACT:R-HSA-168249|Innate Immune System	8	10.53	1	143-74-8, 67227-56-9, 68392-35-8, 33419-42-0, 72-43-5, 79-94-7, 518-28-5, 2971-36-0	12	572	939	1.09	1	1	1
CTD_CHEMICALS_PATHWAYS	REACT:R-HSA-170968|Frs2-mediated activation	2	2.63	1	68392-35-8, 80-05-7	12	98	939	1.6	1	1	1
CTD_CHEMICALS_PATHWAYS	REACT:R-HSA-170984|ARMS-mediated activation	2	2.63	1	68392-35-8, 80-05-7	12	102	939	1.53	1	1	1
CTD_CHEMICALS_PATHWAYS	REACT:R-HSA-179812|GRB2 events in EGFR signaling	2	2.63	1	68392-35-8, 80-05-7	12	89	939	1.76	1	1	1
CTD_CHEMICALS_PATHWAYS	REACT:R-HSA-180336|SHC1 events in EGFR signaling	2	2.63	1	68392-35-8, 80-05-7	12	87	939	1.8	1	1	1
CTD_CHEMICALS_PATHWAYS	REACT:R-HSA-187706|Signalling to p38 via RIT and RIN	2	2.63	1	80-05-7, 68392-35-8	12	95	939	1.65	1	1	1
CTD_CHEMICALS_PATHWAYS	REACT:R-HSA-194315|Signaling by Rho GTPases	2	2.63	1	2971-36-0, 80-05-7	12	108	939	1.45	1	1	1
CTD_CHEMICALS_PATHWAYS	REACT:R-HSA-2428924|IGF1R signaling cascade	3	3.95	1	72-43-5, 68392-35-8, 80-05-7	12	176	939	1.33	1	1	1
CTD_CHEMICALS_PATHWAYS	REACT:R-HSA-2428928|IRS-related events triggered by IGF1R	3	3.95	1	80-05-7, 72-43-5, 68392-35-8	12	179	939	1.31	1	1	1
CTD_CHEMICALS_PATHWAYS	REACT:R-HSA-373076|Class A/1 (Rhodopsin-like receptors)	2	2.63	1	72-43-5, 80-05-7	12	90	939	1.74	1	1	1
CTD_CHEMICALS_PATHWAYS	REACT:R-HSA-453279|Mitotic G1-G1/S phases	2	2.63	1	518-28-5, 33419-42-0	12	119	939	1.32	1	1	1
CTD_CHEMICALS_PATHWAYS	REACT:R-HSA-5357801|Programmed Cell Death	3	3.95	1	518-28-5, 72-43-5, 33419-42-0	12	202	939	1.16	1	1	1
CTD_CHEMICALS_PATHWAYS	REACT:R-HSA-556833|Metabolism of lipids and lipoproteins	6	7.89	1	68392-35-8, 72-43-5, 33419-42-0, 79-94-7, 518-28-5, 2971-36-0	12	403	939	1.17	1	1	1
CTD_CHEMICALS_PATHWAYS	REACT:R-HSA-597592|Post-translational protein modification	3	3.95	1	2971-36-0, 518-28-5, 33419-42-0	12	200	939	1.17	1	1	1
CTD_CHEMICALS_PATHWAYS	REACT:R-HSA-68886|M Phase	2	2.63	1	80-05-7, 2971-36-0	12	83	939	1.89	1	1	1
CTD_CHEMICALS_PATHWAYS	REACT:R-HSA-74751|Insulin receptor signalling cascade	3	3.95	1	68392-35-8, 80-05-7, 72-43-5	12	158	939	1.49	1	1	1
CTD_CHEMICALS_PATHWAYS	REACT:R-HSA-74752|Signaling by Insulin receptor	3	3.95	1	80-05-7, 72-43-5, 68392-35-8	12	165	939	1.42	1	1	1
CTD_CHEMICALS_PATHWAYS	REACT:R-HSA-881907|Gastrin-CREB signalling pathway via PKC and MAPK	3	3.95	1	80-05-7, 79-94-7, 72-43-5	12	205	939	1.15	1	1	1
CTD_CHEMICALS_GOENRICH_MOLFUNCT	GO:0001664|G protein-coupled receptor binding	2	2.63	1	72-43-5, 80-05-7	14	113	1090	1.38	1	1	1
CTD_CHEMICALS_GOENRICH_MOLFUNCT	GO:0004175|endopeptidase activity	2	2.63	1	80-05-7, 79-94-7	14	108	1090	1.44	1	1	1
CTD_CHEMICALS_GOENRICH_MOLFUNCT	GO:0004497|monooxygenase activity	2	2.63	1	68392-35-8, 72-43-5	14	111	1090	1.4	1	1	1
CTD_CHEMICALS_GOENRICH_MOLFUNCT	GO:0004857|enzyme inhibitor activity	3	3.95	1	79-94-7, 68392-35-8, 80-05-7	14	157	1090	1.49	1	1	1
CTD_CHEMICALS_GOENRICH_MOLFUNCT	GO:0005198|structural molecule activity	3	3.95	1	33419-42-0, 518-28-5, 68392-35-8	14	162	1090	1.44	1	1	1
CTD_CHEMICALS_GOENRICH_MOLFUNCT	GO:0005506|iron ion binding	2	2.63	1	72-43-5, 68392-35-8	14	111	1090	1.4	1	1	1
CTD_CHEMICALS_GOENRICH_MOLFUNCT	GO:0005524|ATP binding	5	6.58	1	68392-35-8, 72-43-5, 33419-42-0, 79-94-7, 518-28-5	14	355	1090	1.1	1	1	1
CTD_CHEMICALS_GOENRICH_MOLFUNCT	GO:0008047|enzyme activator activity	3	3.95	1	68392-35-8, 79-94-7, 80-05-7	14	197	1090	1.19	1	1	1
CTD_CHEMICALS_GOENRICH_MOLFUNCT	GO:0008233|peptidase activity	2	2.63	1	80-05-7, 79-94-7	14	125	1090	1.25	1	1	1
CTD_CHEMICALS_GOENRICH_MOLFUNCT	GO:0008324|cation transmembrane transporter activity	2	2.63	1	72-43-5, 80-05-7	14	127	1090	1.23	1	1	1
CTD_CHEMICALS_GOENRICH_MOLFUNCT	GO:0016740|transferase activity	5	6.58	1	68392-35-8, 33419-42-0, 72-43-5, 79-94-7, 518-28-5	14	367	1090	1.06	1	1	1
CTD_CHEMICALS_GOENRICH_MOLFUNCT	GO:0019899|enzyme binding	10	13.16	1	72-43-5, 68392-35-8, 2971-36-0, 518-28-5, 79-94-7, 29767-20-2, 79-95-8, 33419-42-0, 1565-94-2, 143-74-8	14	717	1090	1.09	1	1	1
CTD_CHEMICALS_GOENRICH_MOLFUNCT	GO:0019900|kinase binding	6	7.89	1	33419-42-0, 72-43-5, 68392-35-8, 2971-36-0, 79-94-7, 518-28-5	14	426	1090	1.1	1	1	1
CTD_CHEMICALS_GOENRICH_MOLFUNCT	GO:0019901|protein kinase binding	6	7.89	1	2971-36-0, 79-94-7, 518-28-5, 33419-42-0, 72-43-5, 68392-35-8	14	398	1090	1.17	1	1	1
CTD_CHEMICALS_GOENRICH_MOLFUNCT	GO:0022890|inorganic cation transmembrane transporter activity	2	2.63	1	72-43-5, 80-05-7	14	105	1090	1.48	1	1	1
CTD_CHEMICALS_GOENRICH_MOLFUNCT	GO:0030554|adenyl nucleotide binding	5	6.58	1	518-28-5, 79-94-7, 68392-35-8, 72-43-5, 33419-42-0	14	360	1090	1.08	1	1	1
CTD_CHEMICALS_GOENRICH_MOLFUNCT	GO:0032559|adenyl ribonucleotide binding	5	6.58	1	518-28-5, 79-94-7, 33419-42-0, 72-43-5, 68392-35-8	14	360	1090	1.08	1	1	1
CTD_CHEMICALS_GOENRICH_MOLFUNCT	GO:0036094|small molecule binding	7	9.21	1	518-28-5, 79-94-7, 2971-36-0, 68392-35-8, 33419-42-0, 72-43-5, 143-74-8	14	544	1090	1	1	1	1
CTD_CHEMICALS_GOENRICH_MOLFUNCT	GO:0042803|protein homodimerization activity	6	7.89	1	33419-42-0, 72-43-5, 68392-35-8, 2971-36-0, 79-94-7, 518-28-5	14	423	1090	1.1	1	1	1
CTD_CHEMICALS_GOENRICH_MOLFUNCT	GO:0043168|anion binding	7	9.21	1	143-74-8, 72-43-5, 33419-42-0, 68392-35-8, 2971-36-0, 518-28-5, 79-94-7	14	501	1090	1.09	1	1	1
CTD_CHEMICALS_GOENRICH_MOLFUNCT	GO:0070011|peptidase activity, acting on L-amino acid peptides	2	2.63	1	80-05-7, 79-94-7	14	113	1090	1.38	1	1	1
CTD_CHEMICALS_GOENRICH_MOLFUNCT	GO:0140096|catalytic activity, acting on a protein	6	7.89	1	79-94-7, 518-28-5, 2971-36-0, 68392-35-8, 33419-42-0, 72-43-5	14	395	1090	1.18	1	1	1
CTD_CHEMICALS_GOENRICH_MOLFUNCT	GO:1901681|sulfur compound binding	2	2.63	1	80-05-7, 79-94-7	14	132	1090	1.18	1	1	1
CTD_CHEMICALS_GOENRICH_CELLCOMP	GO:0005576|extracellular region	8	10.53	1	67227-56-9, 68392-35-8, 33419-42-0, 72-43-5, 79-95-8, 518-28-5, 79-94-7, 2971-36-0	14	618	1103	1.02	1	1	1
CTD_CHEMICALS_GOENRICH_CELLCOMP	GO:0005615|extracellular space	7	9.21	1	67227-56-9, 68392-35-8, 72-43-5, 33419-42-0, 518-28-5, 79-94-7, 2971-36-0	14	523	1103	1.05	1	1	1
CTD_CHEMICALS_GOENRICH_CELLCOMP	GO:0005788|endoplasmic reticulum lumen	3	3.95	1	2971-36-0, 80-05-7, 67227-56-9	14	213	1103	1.11	1	1	1
CTD_CHEMICALS_GOENRICH_CELLCOMP	GO:0005813|centrosome	2	2.63	1	518-28-5, 33419-42-0	14	103	1103	1.53	1	1	1
CTD_CHEMICALS_GOENRICH_CELLCOMP	GO:0005815|microtubule organizing center	2	2.63	1	518-28-5, 33419-42-0	14	127	1103	1.24	1	1	1
CTD_CHEMICALS_GOENRICH_CELLCOMP	GO:0005829|cytosol	9	11.84	1	143-74-8, 1565-94-2, 518-28-5, 79-94-7, 2971-36-0, 68392-35-8, 33419-42-0, 79-95-8, 72-43-5	14	653	1103	1.09	1	1	1
CTD_CHEMICALS_GOENRICH_CELLCOMP	GO:0016021|integral component of membrane	5	6.58	1	79-94-7, 518-28-5, 72-43-5, 33419-42-0, 68392-35-8	14	330	1103	1.19	1	1	1
CTD_CHEMICALS_GOENRICH_CELLCOMP	GO:0030425|dendrite	3	3.95	1	79-94-7, 68392-35-8, 72-43-5	14	186	1103	1.27	1	1	1
CTD_CHEMICALS_GOENRICH_CELLCOMP	GO:0030659|cytoplasmic vesicle membrane	3	3.95	1	143-74-8, 79-94-7, 518-28-5	14	186	1103	1.27	1	1	1
CTD_CHEMICALS_GOENRICH_CELLCOMP	GO:0031012|extracellular matrix	2	2.63	1	80-05-7, 67227-56-9	14	127	1103	1.24	1	1	1
CTD_CHEMICALS_GOENRICH_CELLCOMP	GO:0031224|intrinsic component of membrane	5	6.58	1	79-94-7, 518-28-5, 72-43-5, 33419-42-0, 68392-35-8	14	341	1103	1.16	1	1	1
CTD_CHEMICALS_GOENRICH_CELLCOMP	GO:0031252|cell leading edge	2	2.63	1	80-05-7, 143-74-8	14	104	1103	1.52	1	1	1
CTD_CHEMICALS_GOENRICH_CELLCOMP	GO:0031967|organelle envelope	5	6.58	1	2971-36-0, 518-28-5, 79-94-7, 72-43-5, 33419-42-0	14	372	1103	1.06	1	1	1
CTD_CHEMICALS_GOENRICH_CELLCOMP	GO:0031975|envelope	5	6.58	1	79-94-7, 518-28-5, 2971-36-0, 72-43-5, 33419-42-0	14	371	1103	1.06	1	1	1
CTD_CHEMICALS_GOENRICH_CELLCOMP	GO:0033267|axon part	2	2.63	1	80-05-7, 72-43-5	14	95	1103	1.66	1	1	1
CTD_CHEMICALS_GOENRICH_CELLCOMP	GO:0036477|somatodendritic compartment	4	5.26	1	143-74-8, 79-94-7, 72-43-5, 68392-35-8	14	293	1103	1.08	1	1	1
CTD_CHEMICALS_GOENRICH_CELLCOMP	GO:0044422|organelle part	9	11.84	1	68392-35-8, 72-43-5, 2971-36-0, 29767-20-2, 16423-68-0, 79-95-8, 1565-94-2, 143-74-8, 67227-56-9	14	708	1103	1	1	1	1
CTD_CHEMICALS_GOENRICH_CELLCOMP	GO:0044425|membrane part	7	9.21	1	67227-56-9, 68392-35-8, 33419-42-0, 72-43-5, 518-28-5, 79-94-7, 2971-36-0	14	549	1103	1	1	1	1
CTD_CHEMICALS_GOENRICH_CELLCOMP	GO:0044432|endoplasmic reticulum part	7	9.21	1	67227-56-9, 33419-42-0, 72-43-5, 68392-35-8, 2971-36-0, 79-94-7, 518-28-5	14	497	1103	1.11	1	1	1
CTD_CHEMICALS_GOENRICH_CELLCOMP	GO:0044446|intracellular organelle part	9	11.84	1	68392-35-8, 72-43-5, 2971-36-0, 29767-20-2, 16423-68-0, 79-95-8, 1565-94-2, 143-74-8, 67227-56-9	14	701	1103	1.01	1	1	1
CTD_CHEMICALS_GOENRICH_CELLCOMP	GO:0045202|synapse	5	6.58	1	518-28-5, 79-94-7, 143-74-8, 33419-42-0, 72-43-5	14	337	1103	1.17	1	1	1
CTD_CHEMICALS_GOENRICH_CELLCOMP	GO:0048471|perinuclear region of cytoplasm	5	6.58	1	79-94-7, 518-28-5, 68392-35-8, 72-43-5, 33419-42-0	14	316	1103	1.25	1	1	1
CTD_CHEMICALS_GOENRICH_CELLCOMP	GO:0062023|collagen-containing extracellular matrix	2	2.63	1	80-05-7, 67227-56-9	14	88	1103	1.79	1	1	1
CTD_CHEMICALS_GOENRICH_CELLCOMP	GO:0097447|dendritic tree	3	3.95	1	79-94-7, 72-43-5, 68392-35-8	14	185	1103	1.28	1	1	1
CTD_CHEMICALS_GOENRICH_CELLCOMP	GO:0098805|whole membrane	7	9.21	1	33419-42-0, 72-43-5, 68392-35-8, 2971-36-0, 79-94-7, 518-28-5, 143-74-8	14	499	1103	1.11	1	1	1
CTD_CHEMICALS_GOENRICH_CELLCOMP	GO:0098978|glutamatergic synapse	2	2.63	1	72-43-5, 80-05-7	14	80	1103	1.97	1	1	1
CTD_CHEMICALS_GOENRICH_CELLCOMP	GO:0099081|supramolecular polymer	3	3.95	1	33419-42-0, 518-28-5, 143-74-8	14	161	1103	1.47	1	1	1
CTD_CHEMICALS_GOENRICH_CELLCOMP	GO:0099512|supramolecular fiber	3	3.95	1	143-74-8, 518-28-5, 33419-42-0	14	157	1103	1.51	1	1	1
CTD_CHEMICALS_GOENRICH_CELLCOMP	GO:1990904|ribonucleoprotein complex	2	2.63	1	143-74-8, 68392-35-8	14	88	1103	1.79	1	1	1
CTD_GOSLIM_BIOPROCESS	GO:0003013|circulatory system process	7	9.21	1	80-05-7, 1565-94-2, 518-28-5, 79-94-7, 68392-35-8, 33419-42-0, 72-43-5	16	563	1491	1.16	1	1	1
CTD_GOSLIM_BIOPROCESS	GO:0005975|carbohydrate metabolic process	6	7.89	1	518-28-5, 79-94-7, 72-43-5, 33419-42-0, 68392-35-8, 80-05-7	16	472	1491	1.18	1	1	1
CTD_GOSLIM_BIOPROCESS	GO:0006605|protein targeting	2	2.63	1	80-05-7, 72-43-5	16	175	1491	1.06	1	1	1
CTD_GOSLIM_BIOPROCESS	GO:0006790|sulfur compound metabolic process	4	5.26	1	518-28-5, 79-94-7, 80-05-7, 33419-42-0	16	285	1491	1.31	1	1	1
CTD_GOSLIM_BIOPROCESS	GO:0008219|cell death	11	14.47	1	143-74-8, 79-95-8, 33419-42-0, 1565-94-2, 29767-20-2, 80-05-7, 72-43-5, 68392-35-8, 2971-36-0, 79-94-7, 518-28-5	16	1014	1491	1.01	1	1	1
CTD_GOSLIM_BIOPROCESS	GO:0015031|protein transport	7	9.21	1	2971-36-0, 79-94-7, 518-28-5, 72-43-5, 33419-42-0, 68392-35-8, 80-05-7	16	595	1491	1.1	1	1	1
CTD_GOSLIM_BIOPROCESS	GO:0022607|cellular component assembly	7	9.21	1	80-05-7, 143-74-8, 518-28-5, 79-94-7, 33419-42-0, 72-43-5, 68392-35-8	16	579	1491	1.13	1	1	1
CTD_GOSLIM_BIOPROCESS	GO:0040011|locomotion	9	11.84	1	67227-56-9, 33419-42-0, 79-95-8, 80-05-7, 68392-35-8, 72-43-5, 79-94-7, 518-28-5, 2971-36-0	16	761	1491	1.1	1	1	1
CTD_GOSLIM_BIOPROCESS	GO:0065003|protein-containing complex assembly	6	7.89	1	518-28-5, 79-94-7, 68392-35-8, 72-43-5, 33419-42-0, 80-05-7	16	490	1491	1.14	1	1	1
TOXINS_TARGETS	GABRA1	2	2.63	1	22345-47-7, 129-16-8	14	95	1220	1.83	1	1	1
TOXINS_TARGETS	PPARA	2	2.63	1	80-05-7, 79-94-7	14	88	1220	1.98	1	1	1
TOXCAST_ACTIVE	APR_HepG2_CellCycleArrest_24h_dn	2	2.63	1	77-09-8, 79-94-7	18	163	1694	1.15	1	1	1
TOXCAST_ACTIVE	APR_HepG2_CellCycleArrest_72h_dn	3	3.95	1	77-09-8, 79-94-7, 81-90-3	18	235	1694	1.2	1	1	1
TOXCAST_ACTIVE	APR_HepG2_MitoMembPot_72h_dn	2	2.63	1	80-05-7, 1260-17-9	18	126	1694	1.49	1	1	1
TOXCAST_ACTIVE	ATG_Myc_CIS_up	2	2.63	1	77-09-8, 79-94-7	18	104	1694	1.81	1	1	1
TOXCAST_ACTIVE	ATG_PBREM_CIS_up	3	3.95	1	77-09-8, 80-05-7, 16423-68-0	18	241	1694	1.17	1	1	1
TOXCAST_ACTIVE	ATG_RXRb_TRANS_up	4	5.26	1	118-82-1, 77-40-7, 1478-61-1, 79-95-8	18	313	1694	1.2	1	1	1
TOXCAST_ACTIVE	ATG_SREBP_CIS_up	4	5.26	1	79-94-7, 77-09-8, 77-40-7, 80-05-7	18	334	1694	1.13	1	1	1
TOXCAST_ACTIVE	BSK_CASM3C_IL6_down	2	2.63	1	27955-94-8, 68392-35-8	18	113	1694	1.67	1	1	1
TOXCAST_ACTIVE	Tox21_ERa_LUC_BG1_Antagonist	3	3.95	1	115-39-9, 2971-36-0, 68392-35-8	18	197	1694	1.43	1	1	1
TOXPRINT_STRUCTURE	bond:C(=O)O_carboxylicAcid_aromatic	2	2.63	1	16423-68-0, 81-90-3	67	231	8195	1.06	1	1	1
TOXPRINT_STRUCTURE	bond:COH_alcohol_diol_(1_2-)	3	3.95	1	33419-42-0, 29767-20-2, 117091-64-2	67	256	8195	1.43	1	1	1
TOXPRINT_STRUCTURE	bond:CX_halide_alkyl-X_trihalo_(1_1_1-)	3	3.95	1	2971-36-0, 1478-61-1, 72-43-5	67	295	8195	1.24	1	1	1
TOXPRINT_STRUCTURE	bond:CX_halide_aromatic-X_dihalo_benzene_(1_2-)	2	2.63	1	71-67-0, 13473-26-2	67	131	8195	1.87	1	1	1
TOXPRINT_STRUCTURE	bond:CX_halide_generic-X_dihalo_(1_2-)	3	3.95	1	13473-26-2, 71-67-0, 21850-44-2	67	268	8195	1.37	1	1	1
TOXPRINT_STRUCTURE	bond:X[any]_halide	20	26.32	1	79-95-8, 71-67-0, 569-57-3, 14868-03-2, 25327-89-3, 1478-61-1, 21850-44-2, 76-60-8, 4162-45-2, 15086-94-9, 139233-53-7, 67227-56-9, 129-16-8, 13473-26-2, 79-94-7, 2971-36-0, 115-39-9, 72-43-5, 15905-32-5, 16423-68-0	67	2388	8195	1.02	1	1	1
TOXPRINT_STRUCTURE	chain:alkaneBranch_t-butyl_C4	2	2.63	1	85-60-9, 118-82-1	67	236	8195	1.04	1	1	1
HTS_ACTIVE	bile acid homeostasis:tox21-fxr-bla-agonist-p2_fxr-agonist_1	2	2.63	1	27955-94-8, 3236-71-3	68	106	6512	1.81	1	1	1
HTS_ACTIVE	energy homeostasis:tox21-err-p1_err-agonist_1	3	3.95	1	611-99-4, 1470-79-7, 131-54-4	68	224	6512	1.28	1	1	1
HTS_ACTIVE	genotoxic stress:tox21-elg1-luc-agonist-p1_atad5-inducer_1	3	3.95	1	22345-47-7, 117091-64-2, 6559-91-7	68	242	6512	1.19	1	1	1
HTS_ACTIVE	neurotransmission:tox21-ache-p3_ache-inhibitor_1	7	9.21	1	77-09-8, 139233-53-7, 603-50-9, 3236-71-3, 13473-26-2, 68392-35-8, 68047-06-3	68	631	6512	1.06	1	1	1
HTS_ACTIVE	retinoid homeostasis:tox21-rxr-bla-agonist-p1_rxr-agonist_1	2	2.63	1	38103-06-9, 76-60-8	68	189	6512	1.01	1	1	1
HTS_ACTIVE	sex hormone homeostasis:tox21-ar-mda-kb2-luc-agonist-p1_ar-agonist_1	5	6.58	1	71-67-0, 22345-47-7, 14868-03-2, 1470-79-7, 131-55-5	68	405	6512	1.18	1	1	1
HTS_ACTIVE	sex hormone homeostasis:tox21-pr-bla-agonist-p1_pr-agonist_1	3	3.95	1	518-47-8, 72-43-5, 79-95-8	68	252	6512	1.14	1	1	1
HTS_ACTIVE	thyroid homeostasis:tox21-tshr-antagonist-p1_tshr-antagonist_1	5	6.58	1	569-57-3, 72-43-5, 68392-35-8, 68047-06-3, 115-33-3	68	435	6512	1.1	1	1	1
HTS_STRONGACTIVE	apoptosis:tox21-casp3-hepg2-p1_casp3-activator_1	3	3.95	1	4221-68-5, 68047-06-3, 85-60-9	61	167	4870	1.43	1	1	1
HTS_STRONGACTIVE	autofluorescence:autofluor@med-blue-n_1	5	6.58	1	517-28-2, 15905-32-5, 15086-94-9, 61445-50-9, 129-16-8	61	334	4870	1.2	1	1	1
HTS_STRONGACTIVE	autofluorescence:autofluor@med-blue-n_2	5	6.58	1	129-16-8, 61445-50-9, 15086-94-9, 15905-32-5, 517-28-2	61	341	4870	1.17	1	1	1
HTS_STRONGACTIVE	autofluorescence:tox21-spec-hek293-p1_autofluor@blue_1	5	6.58	1	129-16-8, 15086-94-9, 61445-50-9, 517-28-2, 15905-32-5	61	366	4870	1.09	1	1	1
HTS_STRONGACTIVE	autofluorescence:tox21-spec-hek293-p1_autofluor@blue_2	5	6.58	1	517-28-2, 15905-32-5, 61445-50-9, 15086-94-9, 129-16-8	61	378	4870	1.06	1	1	1
HTS_STRONGACTIVE	autofluorescence:tox21-spec-hepg2-p1_autofluor@blue_1	4	5.26	1	129-16-8, 61445-50-9, 15086-94-9, 15905-32-5	61	301	4870	1.06	1	1	1
HTS_STRONGACTIVE	autofluorescence:tox21-spec-hepg2-p1_autofluor@cell-blue-n_1	4	5.26	1	15905-32-5, 61445-50-9, 129-16-8, 15086-94-9	61	250	4870	1.28	1	1	1
HTS_STRONGACTIVE	counter screen (cell viability):tox21-esre-bla-p1_viability_1	3	3.95	1	85-60-9, 1565-94-2, 115-39-9	61	199	4870	1.2	1	1	1
HTS_STRONGACTIVE	genotoxic stress:tox21-elg1-luc-agonist-p1_atad5-inducer_1	2	2.63	1	6559-91-7, 117091-64-2	61	133	4870	1.2	1	1	1
HTS_STRONGACTIVE	neurotransmission:tox21-cre-antagonist-p1_cre-antagonist_1	2	2.63	1	518-47-8, 27955-94-8	61	101	4870	1.58	1	1	1
HTS_STRONGACTIVE	thyroid homeostasis:tox21-tshr-antagonist-p1_tshr-antagonist_1	2	2.63	1	72-43-5, 569-57-3	61	83	4870	1.92	1	1	1
HTS_STRONGACTIVE	xenobiotic homeostasis:tox21-p450-2d6-p1_2d6-inhibitor_1	19	25	1	1260-17-9, 68047-06-3, 24038-68-4, 131-54-4, 38103-06-9, 1470-79-7, 143-74-8, 131-55-5, 15905-32-5, 517-28-2, 52479-85-3, 76-60-8, 79-97-0, 1565-94-2, 61445-50-9, 85-60-9, 67227-56-9, 13473-26-2, 2624-43-3	61	1451	4870	1.05	1	1	1
MULTICASE_TOX_PREDICTION	ASBT inhibition at 10uM	4	5.26	1	125-13-3, 14008-48-1, 115-33-3, 1943-97-1	67	451	7882	1.04	1	1	1
MULTICASE_TOX_PREDICTION	OCT1 inhibition at 100uM	19	25	1	22345-47-7, 125-31-5, 81-90-3, 77-09-8, 143-74-8, 68047-06-3, 68392-35-8, 31477-60-8, 125-13-3, 76-60-8, 518-47-8, 15086-94-9, 115-39-9, 518-28-5, 115-33-3, 14008-48-1, 15905-32-5, 3236-71-3, 34487-61-1	67	2162	7882	1.03	1	1	1
MULTICASE_TOX_PREDICTION	RCA fetal death, mouse	14	18.42	1	68392-35-8, 68047-06-3, 31477-60-8, 569-57-3, 33419-42-0, 517-28-2, 14008-48-1, 518-28-5, 29767-20-2, 117091-64-2, 3236-71-3, 4162-45-2, 6559-91-7, 30299-08-2	67	1623	7882	1.01	1	1	1
MULTICASE_TOX_PREDICTION	RCA fetal death, rodent	24	31.58	1	2624-43-3, 13473-26-2, 1565-94-2, 6559-91-7, 21850-44-2, 4162-45-2, 29767-20-2, 77-40-7, 72-43-5, 517-28-2, 33419-42-0, 569-57-3, 14868-03-2, 25327-89-3, 68392-35-8, 30299-08-2, 16423-68-0, 117091-64-2, 518-28-5, 2971-36-0, 14008-48-1, 31477-60-8, 38103-06-9, 68047-06-3	67	2761	7882	1.02	1	1	1
LEADSCOPE_TOXICITY	Genetic Toxicity: microbial	10	13.16	1	1260-17-9, 14008-48-1, 131-54-4, 41351-30-8, 611-99-4, 61445-50-9, 31127-54-5, 52479-85-3, 131-55-5, 1470-79-7	66	993	7259	1.11	1	1	1
LEADSCOPE_TOXICITY	Human Adverse Cardiological Effects: torsades	7	9.21	1	68047-06-3, 68392-35-8, 5613-46-7, 31477-60-8, 1565-94-2, 13473-26-2, 67227-56-9	66	702	7259	1.1	1	1	1
LEADSCOPE_TOXICITY	Rodent Carcinogenicity: carc rat female	5	6.58	1	569-57-3, 13473-26-2, 14868-03-2, 30299-08-2, 1260-17-9	66	526	7259	1.05	1	1	1
CTD_CHEMICALS_DISEASES	Ceroid lipofuscinosis, neuronal 1, infantile	2	2.63	1	518-28-5, 68392-35-8	25	130	2583	1.59	1	1	1
CTD_CHEMICALS_DISEASES	Cryptorchidism	2	2.63	1	518-28-5, 72-43-5	25	130	2583	1.59	1	1	1
CTD_CHEMICALS_DISEASES	Substance-Related Disorders	2	2.63	1	80-05-7, 143-74-8	25	178	2583	1.16	1	1	1

## Sheet: Bisphenol chemical list
CASRN	Chemical Name
16423-68-0	FD&C Red 3
1943-97-1	4,4'-Octahydro-1H-4,7-methanoindene-5,5-diyldiphenol
31127-54-5	2,3,4,4'-Tetrahydroxybenzophenone
611-99-4	4,4'-Dihydoxybenzophenone
77-09-8	Phenolphthalein
115-33-3	Oxyphenisatin acetate
125-31-5	p-Xylenol blue
126-00-1	Diphenolic acid
131-55-5	2,2',4,4'-Tetrahydroxybenzophenone
139233-53-7	Zelandopam
143-74-8	Phenol red
1470-79-7	2,4,4'-Trihydroxybenzophenone
14868-03-2	Dihydroxymethoxychlor olefin
1571-75-1	4,4'-(1-Phenylethylidene)bisphenol
2624-43-3	Cyclofenil
27955-94-8	4-[1,1-bis(4-hydroxyphenyl)ethyl]phenol
41351-30-8	2,4-Dimethoxy-4'-hydroxy benzophenone
518-47-8	Fluorescein sodium
52479-85-3	Exifone
603-50-9	Bisacodyl
61445-50-9	2,3',4,4'-Tetrahydroxybenzophenone
620-92-8	Bis(4-hydroxyphenyl)methane
6807-17-6	4,4'-(4-Methylpentane-2,2-diyl)diphenol
68392-35-8	4-Hydroxytamoxifen
72-43-5	Methoxychlor
77-40-7	Bisphenol B
79-94-7	3,3',5,5'-Tetrabromobisphenol A
79-97-0	3,3'-Dimethylbisphenol A
843-55-0	Bisphenol Z
31477-60-8	Ormeloxifene
4162-45-2	Ethanol, 2,2'-((1-methylethylidene)bis((2,6-dibromo-4,1-phenylene)oxy))bis-
4221-68-5	1,1-Bis(3-cyclohexyl-4-hydroxyphenyl)cyclohexane
517-28-2	Hematoxylin
569-57-3	Chlorotrianisene
71-67-0	Sulfobromophthalein
79-95-8	2,2',6,6'-Tetrachlorobisphenol A
85-60-9	4,4'-Butane-1,1-diylbis(2-tert-butyl-5-methylphenol)
131-54-4	2,2'-Dihydroxy-4,4'-dimethoxybenzophenone
125-13-3	Oxyphenisatin
25327-89-3	Benzene, 1,1'-(1-methylethylidene)bis[3,5-dibromo-4-(2-propenyloxy)-
596-03-2	4',5'-Dibromofluorescein
76-60-8	Bromcresol green
15086-94-9	2',4',5',7'-Tetrabromofluorescein
34487-61-1	Phenol Red sodium salt
81-90-3	Phenolphthalin
115-39-9	Bromophenol blue
118-82-1	4,4'-Methylenebis(2,6-di-t-butylphenol)
21850-44-2	Tetrabromobisphenol A-bis(2,3-dibromopropyl ether)
13080-86-9	4,4'-(Isopropylidenebis(4,1-phenyleneoxy))dianiline
15905-32-5	Erythrosin B
22345-47-7	Tofisopam
2971-36-0	2,2-Bis(4-hydroxyphenyl)-1,1,1-trichloroethane
29767-20-2	Teniposide
30299-08-2	Clinofibrate
3236-71-3	4,4'-(9H-Fluorene-9,9-diyl)diphenol
518-28-5	Podofilox
5613-46-7	4,4'-Propane-2,2-diylbis(2,6-dimethylphenol)
6559-91-7	4'-Demethylepipodophyllotoxin
68047-06-3	(Z)-4-Hydroxytamoxifen
80-05-7	Bisphenol A
67227-56-9	Fenoldopam
1565-94-2	Bisphenol A glycidyl methacrylate
117091-64-2	Etoposide phosphate
33419-42-0	Etoposide
38103-06-9	5,5'-[Propane-2,2-diylbis(benzene-4,1-diyloxy)]bis(2-benzofuran-1,3-dione)
10040-45-6	Picosulfate sodium
1260-17-9	Carminic acid
13473-26-2	D&C Red 27
14008-48-1	Bisoxatin acetate
1478-61-1	Bisphenol AF
24038-68-4	BisOPP-A
2095-03-06	Bis[4-(glycidyloxy)phenyl]methane
129-16-8	Mercurochrome
2081-08-05	Bisphenol E
2321-07-05	Fluorescein
27072-45-3	Fluorescein 5(6)-isothiocyanate

## Sheet: Halogenated PAH results
Category	Term	Count	%	PValue	CASRNs	List Total	Pop Hits	Pop Total	Fold Enrichment	Bonferroni	Benjamini-Yekutieli	Benjamini-Hochberg
TOXPRINT_STRUCTURE	ring:fused_[6_6]_naphthalene	17	40.48	0	523-27-3, 56-55-3, 85-01-8, 91-20-3, 1564-64-3, 90-12-0, 218-01-9, 2243-61-0, 90-13-1, 134-32-7, 2243-62-1, 53-70-3, 573-17-1, 215-58-7, 192-97-2, 571-58-4, 90-15-3	38	192	8195	19.09	0	0	0
MESH	Hydrocarbons, Aromatic	23	54.76	0	56-55-3, 120-80-9, 90-12-0, 2243-61-0, 53-70-3, 85-01-8, 106-37-6, 108-90-7, 571-58-4, 91-20-3, 92-52-4, 218-01-9, 5436-43-1, 87-82-1, 100-39-0, 108-86-1, 2243-62-1, 92-66-0, 90-13-1, 134-32-7, 91-16-7, 192-97-2, 90-15-3	31	964	5355	4.12	0	0	0
MULTICASE_TOX_PREDICTION	MRP2 inhibition at 10uM	2	4.76	0	90-13-1, 108-90-7	38	4014	7882	0.1	0	0	0
MESH	Hydrocarbons, Cyclic	23	54.76	0	90-15-3, 192-97-2, 91-16-7, 134-32-7, 90-13-1, 2243-62-1, 92-66-0, 108-86-1, 100-39-0, 87-82-1, 5436-43-1, 218-01-9, 92-52-4, 91-20-3, 571-58-4, 108-90-7, 106-37-6, 85-01-8, 53-70-3, 2243-61-0, 90-12-0, 120-80-9, 56-55-3	31	1089	5355	3.65	0	0	0
TOXPRINT_STRUCTURE	ring:fused_PAH_phenanthrene	7	16.67	0	192-97-2, 218-01-9, 53-70-3, 85-01-8, 56-55-3, 215-58-7, 573-17-1	38	25	8195	60.38	0	0	0
LEADSCOPE_TOXICITY	Genetic Toxicity: salmonella	22	52.38	0	218-01-9, 100-39-0, 52417-22-8, 100-65-2, 90-47-1, 2243-62-1, 3811-73-2, 134-32-7, 523-27-3, 192-97-2, 86-74-8, 132-64-9, 2243-61-0, 90-12-0, 56-55-3, 573-17-1, 53-70-3, 1564-64-3, 85-01-8, 571-58-4, 484-23-1, 215-58-7	36	1133	7259	3.92	0	0	0
MESH	Polycyclic Hydrocarbons, Aromatic	13	30.95	0	53-70-3, 571-58-4, 90-15-3, 192-97-2, 85-01-8, 56-55-3, 91-20-3, 218-01-9, 90-12-0, 2243-62-1, 134-32-7, 90-13-1, 2243-61-0	31	266	5355	8.44	0	0	0
TOXPRINT_STRUCTURE	ring:aromatic_benzene	37	88.1	0	53-70-3, 132-65-0, 120-80-9, 132-64-9, 215-58-7, 571-58-4, 1564-64-3, 100-65-2, 101-55-3, 90-13-1, 2243-62-1, 92-66-0, 92-52-4, 218-01-9, 108-86-1, 573-17-1, 2243-61-0, 95-46-5, 484-23-1, 85-01-8, 106-37-6, 90-47-1, 52417-22-8, 91-20-3, 5436-43-1, 86-74-8, 91-16-7, 134-32-7, 2113-57-7, 56-55-3, 90-12-0, 108-90-7, 100-39-0, 87-82-1, 192-97-2, 90-15-3, 523-27-3	38	4542	8195	1.76	0	0	0
TOXPRINT_STRUCTURE	ring:fused_PAH_anthracene	6	14.29	0	56-55-3, 1564-64-3, 53-70-3, 215-58-7, 523-27-3, 192-97-2	38	21	8195	61.62	0	0	0
TOXINS_TARGETS	GNMT	7	16.67	0	91-20-3, 218-01-9, 192-97-2, 56-55-3, 53-70-3, 85-01-8, 90-12-0	16	21	1220	25.42	0.0001	0.0001	0
TOXINS_TARGETS	AHR	11	26.19	0	53-70-3, 91-20-3, 56-55-3, 85-01-8, 101-55-3, 90-15-3, 92-66-0, 192-97-2, 2113-57-7, 90-12-0, 218-01-9	16	119	1220	7.05	0.0001	0.0001	0
LEADSCOPE_TOXICITY	Genetic Toxicity: microbial	19	45.24	0	53-70-3, 573-17-1, 56-55-3, 90-12-0, 2243-61-0, 571-58-4, 215-58-7, 85-01-8, 1564-64-3, 90-47-1, 100-65-2, 52417-22-8, 91-20-3, 218-01-9, 192-97-2, 90-15-3, 523-27-3, 2243-62-1, 134-32-7	36	993	7259	3.86	0.0001	0.0001	0
CTD_CHEMICALS_GENES	CYP1A	8	19.05	0	571-58-4, 56-55-3, 90-47-1, 86-74-8, 218-01-9, 83-56-7, 132-65-0, 215-58-7	27	40	2273	16.84	0.0002	0.0001	0
MESH	Hydrocarbons	23	54.76	0	108-86-1, 192-97-2, 90-15-3, 92-52-4, 218-01-9, 87-82-1, 100-39-0, 108-90-7, 56-55-3, 90-12-0, 90-13-1, 134-32-7, 92-66-0, 2243-62-1, 91-16-7, 91-20-3, 5436-43-1, 85-01-8, 106-37-6, 571-58-4, 120-80-9, 2243-61-0, 53-70-3	31	1449	5355	2.74	0.0002	0.0001	0
MULTICASE_TOX_PREDICTION	OCT1 inhibition at 100uM	26	61.9	0	90-47-1, 52417-22-8, 91-20-3, 86-74-8, 91-16-7, 90-13-1, 134-32-7, 2243-62-1, 53-70-3, 573-17-1, 132-65-0, 120-80-9, 95-46-5, 2243-61-0, 132-64-9, 215-58-7, 571-58-4, 85-01-8, 1564-64-3, 218-01-9, 192-97-2, 90-15-3, 523-27-3, 3811-73-2, 56-55-3, 90-12-0	38	2162	7882	2.49	0.0005	0.0003	0
MULTICASE_TOX_PREDICTION	MRP1 substrates	2	4.76	0	120-80-9, 90-15-3	38	3067	7882	0.14	0.0006	0.0003	0
MESH	Naphthalenes	8	19.05	0	91-20-3, 2243-61-0, 90-13-1, 134-32-7, 2243-62-1, 90-15-3, 571-58-4, 90-12-0	31	94	5355	14.7	0.0008	0.0004	0
CTD_CHEMICALS_GENES	AHR	11	26.19	0	132-64-9, 192-97-2, 134-32-7, 215-58-7, 218-01-9, 90-12-0, 53-70-3, 91-20-3, 86-74-8, 56-55-3, 85-01-8	27	139	2273	6.66	0.0016	0.0007	0.0001
MULTICASE_TOX_PREDICTION	Sensory irritation, mouse	4	9.52	0	5436-43-1, 90-47-1, 91-16-7, 120-80-9	38	3423	7882	0.24	0.0041	0.0017	0.0002
MULTICASE_TOX_PREDICTION	Draize eye irritation test, rabbit	8	19.05	0	101-55-3, 90-13-1, 95-46-5, 134-32-7, 90-12-0, 100-39-0, 3811-73-2, 90-15-3	38	4342	7882	0.38	0.0105	0.0041	0.0005
LEADSCOPE_TOXICITY	Rodent Carcinogenicity: BALBc-3T3	25	59.52	0	56-55-3, 90-12-0, 108-90-7, 87-82-1, 218-01-9, 523-27-3, 90-15-3, 192-97-2, 120-80-9, 2243-61-0, 53-70-3, 106-37-6, 85-01-8, 571-58-4, 215-58-7, 91-20-3, 5436-43-1, 100-65-2, 101-55-3, 92-66-0, 2243-62-1, 2113-57-7, 134-32-7, 90-13-1, 91-16-7	36	2302	7259	2.19	0.0124	0.0046	0.0006
CTD_CHEMICALS_GENES	CYP1A2	11	26.19	0	215-58-7, 571-58-4, 53-70-3, 90-12-0, 218-01-9, 90-13-1, 132-64-9, 85-01-8, 56-55-3, 92-52-4, 91-20-3	27	175	2273	5.29	0.0133	0.0047	0.0006
CTD_CHEMICALS_GENES	CYP1B1	7	16.67	0	92-52-4, 90-47-1, 53-70-3, 215-58-7, 218-01-9, 56-55-3, 85-01-8	27	50	2273	11.79	0.018	0.0061	0.0008
HTS_STRONGACTIVE	xenobiotic homeostasis:tox21-p450-1a2-p1_1a2-inhibitor_1	19	45.24	0	56-55-3, 218-01-9, 90-15-3, 192-97-2, 83-56-7, 132-64-9, 132-65-0, 573-17-1, 85-01-8, 484-23-1, 5436-43-1, 52417-22-8, 90-47-1, 134-32-7, 2113-57-7, 2243-62-1, 92-66-0, 101-55-3, 86-74-8	23	1769	4870	2.27	0.0207	0.0067	0.0009
MESH	Polycyclic Compounds	13	30.95	0	85-01-8, 2243-62-1, 134-32-7, 90-13-1, 571-58-4, 90-15-3, 192-97-2, 91-20-3, 56-55-3, 2243-61-0, 218-01-9, 90-12-0, 53-70-3	31	567	5355	3.96	0.0332	0.0103	0.0013
MULTICASE_TOX_PREDICTION	Allergic contact dermatitis, guinea pig and human	9	21.43	0	90-15-3, 3811-73-2, 52417-22-8, 134-32-7, 2243-61-0, 484-23-1, 100-65-2, 2243-62-1, 120-80-9	38	4348	7882	0.43	0.0532	0.0159	0.002
MULTICASE_TOX_PREDICTION	OCT1 substrates	2	4.76	0	120-80-9, 90-15-3	38	2352	7882	0.18	0.0569	0.0163	0.0021
MULTICASE_TOX_PREDICTION	MRP2 substrates	4	9.52	0.0001	90-15-3, 87-82-1, 101-55-3, 120-80-9	38	3051	7882	0.27	0.0697	0.0193	0.0025
CTD_CHEMICALS_DISEASES	Lung Injury	15	35.71	0.0001	86-74-8, 571-58-4, 90-15-3, 484-23-1, 108-90-7, 90-13-1, 134-32-7, 108-86-1, 90-47-1, 100-39-0, 92-52-4, 56-55-3, 132-64-9, 218-01-9, 90-12-0	28	461	2583	3	0.0747	0.02	0.0026
CTD_CHEMICALS_DISEASES	Glaucoma 3, primary infantile, B	6	14.29	0.0001	215-58-7, 53-70-3, 90-15-3, 90-47-1, 92-52-4, 192-97-2	28	44	2583	12.58	0.0909	0.0235	0.003
MULTICASE_TOX_PREDICTION	Dendritic cell activation at 100uM (CD86, CD54)	2	4.76	0.0001	90-15-3, 100-39-0	38	2329	7882	0.18	0.0988	0.0247	0.0032
CTD_CHEMICALS_DISEASES	Splenic Diseases	9	21.43	0.0001	92-52-4, 86-74-8, 85-01-8, 134-32-7, 90-13-1, 90-15-3, 571-58-4, 132-64-9, 90-12-0	28	147	2583	5.65	0.1048	0.0254	0.0033
LEADSCOPE_TOXICITY	Rodent Carcinogenicity: C3H10T1-2	4	9.52	0.0001	100-65-2, 101-55-3, 5436-43-1, 91-16-7	36	2828	7259	0.29	0.1079	0.0254	0.0033
LEADSCOPE_TOXICITY	Genetic Toxicity: In vitro composite	15	35.71	0.0001	134-32-7, 2243-62-1, 523-27-3, 91-16-7, 192-97-2, 218-01-9, 52417-22-8, 1564-64-3, 85-01-8, 215-58-7, 2243-61-0, 56-55-3, 120-80-9, 573-17-1, 53-70-3	36	1011	7259	2.99	0.1648	0.0376	0.0048
TOXINS_TARGETS	DNA	8	19.05	0.0001	91-20-3, 53-70-3, 85-01-8, 56-55-3, 192-97-2, 108-86-1, 218-01-9, 90-12-0	16	110	1220	5.55	0.1843	0.0408	0.0053
CTD_CHEMICALS_GENES	EPHX1	5	11.9	0.0001	53-70-3, 56-55-3, 2243-62-1, 91-20-3, 218-01-9	27	25	2273	16.84	0.1893	0.0408	0.0053
MULTICASE_TOX_PREDICTION	MRP4 inhibition at 50uM	3	7.14	0.0002	91-16-7, 90-47-1, 5436-43-1	38	2481	7882	0.25	0.3188	0.0668	0.0086
CTD_CHEMICALS_DISEASES	Glaucoma 3, Primary Congenital, A	5	11.9	0.0003	90-47-1, 92-52-4, 90-15-3, 215-58-7, 132-65-0	28	32	2583	14.41	0.365	0.0725	0.0094
CTD_CHEMICALS_DISEASES	Splenomegaly	11	26.19	0.0003	90-15-3, 571-58-4, 215-58-7, 86-74-8, 108-86-1, 90-12-0, 132-64-9, 2243-62-1, 134-32-7, 90-13-1, 120-80-9	28	278	2583	3.65	0.3695	0.0725	0.0094
LEADSCOPE_TOXICITY	Genetic Toxicity: UDS rat hepatocytes	8	19.05	0.0003	56-55-3, 90-12-0, 134-32-7, 2243-61-0, 2243-62-1, 53-70-3, 215-58-7, 571-58-4	36	278	7259	5.8	0.3916	0.0725	0.0094
MESH	1-Naphthylamine	3	7.14	0.0003	2243-62-1, 2243-61-0, 134-32-7	31	5	5355	103.65	0.3928	0.0725	0.0094
MESH	Bromobenzenes	3	7.14	0.0003	106-37-6, 108-86-1, 87-82-1	31	5	5355	103.65	0.3928	0.0725	0.0094
MESH	Hydrocarbons, Brominated	4	9.52	0.0004	5436-43-1, 87-82-1, 108-86-1, 106-37-6	31	26	5355	26.58	0.4948	0.0892	0.0115
LEADSCOPE_TOXICITY	Genetic Toxicity: E. coli	15	35.71	0.0004	134-32-7, 2243-62-1, 192-97-2, 91-16-7, 91-20-3, 87-82-1, 100-65-2, 52417-22-8, 106-37-6, 215-58-7, 571-58-4, 56-55-3, 2243-61-0, 90-12-0, 53-70-3	36	1127	7259	2.68	0.5327	0.0926	0.0119
TOXPRINT_STRUCTURE	ring:fused_PAH_benz(a)anthracene	3	7.14	0.0004	53-70-3, 215-58-7, 56-55-3	38	7	8195	92.42	0.5372	0.0926	0.0119
TOXPRINT_STRUCTURE	bond:COH_alcohol_generic	2	4.76	0.0005	120-80-9, 90-15-3	38	2130	8195	0.2	0.5897	0.0994	0.0128
HTS_ACTIVE	xenobiotic homeostasis:tox21-p450-1a2-p1_1a2-inhibitor_1	27	64.29	0.0007	573-17-1, 95-46-5, 484-23-1, 106-37-6, 85-01-8, 52417-22-8, 90-47-1, 5436-43-1, 86-74-8, 2113-57-7, 134-32-7, 90-12-0, 56-55-3, 95-56-7, 90-15-3, 192-97-2, 132-64-9, 83-56-7, 132-65-0, 571-58-4, 93-52-7, 2243-62-1, 92-66-0, 90-13-1, 101-55-3, 218-01-9, 108-86-1	31	3697	6512	1.53	0.867	0.143	0.0184
TOXPRINT_STRUCTURE	chain:aromaticAlkane_Ph-C1_acyclic_generic	4	9.52	0.0007	571-58-4, 95-46-5, 100-39-0, 90-12-0	38	2653	8195	0.33	0.9184	0.1466	0.0189
HTS_ACTIVE	xenobiotic homeostasis:tox21-car-agonist-p1_car-agonist_1	14	33.33	0.0007	573-17-1, 120-80-9, 56-55-3, 83-56-7, 484-23-1, 85-01-8, 90-47-1, 218-01-9, 5436-43-1, 86-74-8, 192-97-2, 90-15-3, 2243-62-1, 134-32-7	31	1119	6512	2.63	0.9262	0.1466	0.0189
CTD_CHEMICALS_DISEASES	Liver Diseases	14	33.33	0.0007	86-74-8, 108-90-7, 571-58-4, 85-01-8, 90-13-1, 134-32-7, 2243-62-1, 53-70-3, 100-39-0, 120-80-9, 92-52-4, 90-12-0, 87-82-1, 132-64-9	28	507	2583	2.55	0.9646	0.1496	0.0193
CTD_CHEMICALS_DISEASES	Ureteral Neoplasms	6	14.29	0.0011	86-74-8, 132-64-9, 90-15-3, 215-58-7, 134-32-7, 90-12-0	28	79	2583	7.01	1	0.2207	0.0285
PHARMACTIONLIST	Pharmacologic Actions	2	4.76	0.0011	484-23-1, 3811-73-2	6	2375	2720	0.38	1	0.2207	0.0285
CTD_CHEMICALS_DISEASES	Hyperoxia	9	21.43	0.0012	53-70-3, 86-74-8, 134-32-7, 90-12-0, 218-01-9, 91-20-3, 92-52-4, 56-55-3, 85-01-8	28	216	2583	3.84	1	0.2207	0.0285
MULTICASE_TOX_PREDICTION	BSEP inhibition at 100uM	7	16.67	0.0012	120-80-9, 95-46-5, 573-17-1, 91-16-7, 5436-43-1, 90-47-1, 87-82-1	38	3339	7882	0.43	1	0.2261	0.0292
CTD_CHEMICALS_DISEASES	Methemoglobinemia	5	11.9	0.0012	100-65-2, 571-58-4, 90-13-1, 108-86-1, 90-12-0	28	47	2583	9.81	1	0.2293	0.0296
MULTICASE_TOX_PREDICTION	RCA human acute liver damage	3	7.14	0.0013	484-23-1, 91-16-7, 90-47-1	38	2138	7882	0.29	1	0.2406	0.031
CTD_CHEMICALS_DISEASES	Growth Disorders	10	23.81	0.0014	86-74-8, 53-70-3, 215-58-7, 100-39-0, 90-15-3, 571-58-4, 92-52-4, 90-13-1, 134-32-7, 90-12-0	28	278	2583	3.32	1	0.246	0.0317
CTD_CHEMICALS_DISEASES	Peanut Hypersensitivity	6	14.29	0.0015	90-15-3, 86-74-8, 132-64-9, 134-32-7, 215-58-7, 90-12-0	28	84	2583	6.59	1	0.2592	0.0334
LEADSCOPE_TOXICITY	Genetic Toxicity: In vitro chrom. ab. CHL	14	33.33	0.0016	53-70-3, 573-17-1, 120-80-9, 56-55-3, 2243-61-0, 90-12-0, 571-58-4, 215-58-7, 85-01-8, 218-01-9, 192-97-2, 91-16-7, 2243-62-1, 134-32-7	36	1136	7259	2.48	1	0.2723	0.0351
LEADSCOPE_TOXICITY	Genetic Toxicity: UDS human lymphocytes	9	21.43	0.0016	90-12-0, 56-55-3, 52417-22-8, 100-39-0, 100-65-2, 53-70-3, 215-58-7, 571-58-4, 192-97-2	36	478	7259	3.8	1	0.2723	0.0351
CTD_CHEMICALS_DISEASES	Infertility, Male	13	30.95	0.0016	132-64-9, 218-01-9, 90-12-0, 92-52-4, 56-55-3, 90-47-1, 53-70-3, 134-32-7, 108-86-1, 95-56-7, 90-15-3, 215-58-7, 86-74-8	28	478	2583	2.51	1	0.2726	0.0352
CTD_CHEMICALS_DISEASES	Pancreatic cancer, adult	6	14.29	0.0019	90-15-3, 132-64-9, 134-32-7, 215-58-7, 90-12-0, 86-74-8	28	89	2583	6.22	1	0.3144	0.0406
MULTICASE_TOX_PREDICTION	Haptenation (DPRA, SH test)	25	59.52	0.0021	218-01-9, 90-13-1, 1564-64-3, 215-58-7, 571-58-4, 132-64-9, 132-65-0, 120-80-9, 53-70-3, 523-27-3, 192-97-2, 90-15-3, 100-39-0, 90-12-0, 56-55-3, 134-32-7, 91-16-7, 86-74-8, 91-20-3, 52417-22-8, 90-47-1, 85-01-8, 484-23-1, 2243-61-0, 573-17-1	38	3122	7882	1.66	1	0.3458	0.0446
CTD_CHEMICALS_DISEASES	Warfarin Sensitivity	7	16.67	0.0023	215-58-7, 87-82-1, 2243-62-1, 132-64-9, 90-15-3, 91-20-3, 53-70-3	28	137	2583	4.71	1	0.3712	0.0479
CTD_CHEMICALS_DISEASES	Arthritis, Rheumatoid	12	28.57	0.0024	86-74-8, 108-90-7, 192-97-2, 215-58-7, 106-37-6, 108-86-1, 134-32-7, 53-70-3, 56-55-3, 90-12-0, 132-64-9, 87-82-1	28	429	2583	2.58	1	0.3746	0.0483
MULTICASE_TOX_PREDICTION	BCRP substrates	5	11.9	0.0025	91-16-7, 5436-43-1, 90-47-1, 100-65-2, 484-23-1	38	2678	7882	0.39	1	0.3869	0.0499
LEADSCOPE_TOXICITY	Rodent Carcinogenicity: cell transformation	24	57.14	0.0027	90-12-0, 56-55-3, 523-27-3, 192-97-2, 90-15-3, 95-46-5, 2243-61-0, 573-17-1, 85-01-8, 5436-43-1, 91-20-3, 2113-57-7, 134-32-7, 91-16-7, 218-01-9, 120-80-9, 53-70-3, 1564-64-3, 571-58-4, 215-58-7, 92-66-0, 2243-62-1, 90-13-1, 101-55-3	36	2884	7259	1.68	1	0.4014	0.0518
CTD_CHEMICALS_DISEASES	Nystagmus, Congenital	6	14.29	0.0027	90-15-3, 132-64-9, 134-32-7, 215-58-7, 90-12-0, 86-74-8	28	96	2583	5.77	1	0.4014	0.0518
LEADSCOPE_TOXICITY	Genetic Toxicity: UDS	10	23.81	0.0028	571-58-4, 215-58-7, 2243-62-1, 134-32-7, 100-65-2, 53-70-3, 100-39-0, 56-55-3, 2243-61-0, 90-12-0	36	645	7259	3.13	1	0.4108	0.053
CTD_CHEMICALS_DISEASES	Hemorrhage	6	14.29	0.0029	2243-62-1, 132-64-9, 192-97-2, 484-23-1, 215-58-7, 86-74-8	28	98	2583	5.65	1	0.4246	0.0548
LEADSCOPE_TOXICITY	Rodent Carcinogenicity: SHE	24	57.14	0.003	218-01-9, 108-86-1, 90-13-1, 92-66-0, 120-80-9, 53-70-3, 1564-64-3, 215-58-7, 571-58-4, 523-27-3, 90-15-3, 192-97-2, 90-12-0, 56-55-3, 108-90-7, 91-20-3, 52417-22-8, 90-47-1, 2113-57-7, 91-16-7, 95-46-5, 573-17-1, 85-01-8, 106-37-6	36	2938	7259	1.65	1	0.4246	0.0548
CTD_CHEMICALS_PATHWAYS	KEGG:hsa00982|Drug metabolism - cytochrome P450	6	14.29	0.003	85-01-8, 53-70-3, 91-20-3, 108-86-1, 90-15-3, 134-32-7	13	88	939	4.92	1	0.4248	0.0548
TOXPRINT_STRUCTURE	bond:CX_halide_aromatic-X_generic	13	30.95	0.0034	523-27-3, 101-55-3, 90-13-1, 2113-57-7, 92-66-0, 108-86-1, 87-82-1, 5436-43-1, 106-37-6, 1564-64-3, 108-90-7, 95-46-5, 573-17-1	38	1148	8195	2.44	1	0.4722	0.0609
LEADSCOPE_TOXICITY	Genetic Toxicity: SCE in vitro CHO	28	66.67	0.0035	2243-61-0, 573-17-1, 85-01-8, 106-37-6, 91-20-3, 90-47-1, 52417-22-8, 134-32-7, 2113-57-7, 86-74-8, 91-16-7, 56-55-3, 90-12-0, 108-90-7, 523-27-3, 90-15-3, 192-97-2, 120-80-9, 132-64-9, 53-70-3, 1564-64-3, 215-58-7, 571-58-4, 100-65-2, 90-13-1, 2243-62-1, 218-01-9, 108-86-1	36	3810	7259	1.48	1	0.4807	0.062
CTD_CHEMICALS_DISEASES	Urinary Bladder Calculi	5	11.9	0.0041	215-58-7, 134-32-7, 86-74-8, 90-15-3, 90-12-0	28	65	2583	7.1	1	0.556	0.0717
CTD_CHEMICALS_GENES	CYP1A1	9	21.43	0.0042	56-55-3, 85-01-8, 91-20-3, 92-52-4, 218-01-9, 132-64-9, 53-70-3, 192-97-2, 215-58-7	27	242	2273	3.13	1	0.556	0.0717
MULTICASE_TOX_PREDICTION	BCRP inhibition at 10uM	15	35.71	0.0044	86-74-8, 100-65-2, 91-20-3, 484-23-1, 215-58-7, 85-01-8, 1564-64-3, 53-70-3, 573-17-1, 132-65-0, 132-64-9, 192-97-2, 523-27-3, 218-01-9, 56-55-3	38	1436	7882	2.17	1	0.5839	0.0753
HTS_STRONGACTIVE	sex hormone homeostasis:tox21-ar-mda-kb2-luc-antagonist-p2_ar-antagonist_1	8	19.05	0.005	86-74-8, 90-15-3, 85-01-8, 52417-22-8, 573-17-1, 132-65-0, 56-55-3, 5436-43-1	23	501	4870	3.38	1	0.6544	0.0844
PHARMACTIONLIST	Carcinogens	3	7.14	0.0052	86-74-8, 53-70-3, 134-32-7	6	64	2720	21.25	1	0.668	0.0861
MULTICASE_TOX_PREDICTION	MRP1 inhibition at 10uM	17	40.48	0.0053	192-97-2, 523-27-3, 218-01-9, 56-55-3, 91-16-7, 86-74-8, 2243-62-1, 52417-22-8, 91-20-3, 215-58-7, 484-23-1, 1564-64-3, 85-01-8, 573-17-1, 53-70-3, 132-64-9, 132-65-0	38	1795	7882	1.96	1	0.668	0.0861
CTD_CHEMICALS_DISEASES	Hyperventilation	5	11.9	0.0054	90-12-0, 215-58-7, 134-32-7, 86-74-8, 90-15-3	28	70	2583	6.59	1	0.6787	0.0875
PRODUCT_CLASS	Toxicants	3	7.14	0.0057	108-90-7, 120-80-9, 192-97-2	4	70	1571	16.83	1	0.6991	0.0902
HTS_STRONGACTIVE	xenobiotic homeostasis:tox21-ahr-p1_ahr-agonist_1	6	14.29	0.0057	56-55-3, 134-32-7, 2243-62-1, 90-15-3, 192-97-2, 52417-22-8	23	266	4870	4.78	1	0.6991	0.0902
TOXINS_TARGETS	CYP1B1	3	7.14	0.006	91-20-3, 85-01-8, 92-52-4	16	10	1220	22.88	1	0.7247	0.0935
CTD_CHEMICALS_DISEASES	Porphyria Cutanea Tarda	5	11.9	0.0063	215-58-7, 90-13-1, 571-58-4, 92-52-4, 90-12-0	28	73	2583	6.32	1	0.7515	0.0969
CTD_CHEMICALS_PATHWAYS	REACT:R-HSA-114608|Platelet degranulation	5	11.9	0.0064	91-20-3, 53-70-3, 218-01-9, 108-86-1, 56-55-3	13	64	939	5.64	1	0.7576	0.0977
CTD_CHEMICALS_PATHWAYS	REACT:R-HSA-211945|Phase 1 - Functionalization of compounds	6	14.29	0.0075	85-01-8, 91-20-3, 53-70-3, 218-01-9, 90-15-3, 134-32-7	13	108	939	4.01	1	0.8721	0.1125
CTD_CHEMICALS_DISEASES	Primary Ovarian Insufficiency	6	14.29	0.0076	56-55-3, 91-20-3, 218-01-9, 90-15-3, 2243-62-1, 192-97-2	28	122	2583	4.54	1	0.8721	0.1125
CTD_CHEMICALS_PATHWAYS	KEGG:hsa00980|Metabolism of xenobiotics by cytochrome P450	6	14.29	0.0078	90-15-3, 108-86-1, 218-01-9, 53-70-3, 91-20-3, 85-01-8	13	109	939	3.98	1	0.8894	0.1147
MULTICASE_TOX_PREDICTION	Extent of human metabolism, %	27	64.29	0.0079	218-01-9, 571-58-4, 215-58-7, 1564-64-3, 53-70-3, 120-80-9, 132-65-0, 132-64-9, 2243-62-1, 90-13-1, 56-55-3, 90-12-0, 192-97-2, 90-15-3, 523-27-3, 484-23-1, 85-01-8, 573-17-1, 95-46-5, 2243-61-0, 86-74-8, 91-16-7, 134-32-7, 90-47-1, 52417-22-8, 91-20-3, 5436-43-1	38	3798	7882	1.47	1	0.8894	0.1147
MULTICASE_TOX_PREDICTION	Draize skin test, 24h, rabbit	10	23.81	0.0081	92-52-4, 1564-64-3, 90-13-1, 2243-62-1, 92-66-0, 90-12-0, 100-39-0, 90-15-3, 134-32-7, 2113-57-7	38	3615	7882	0.57	1	0.8983	0.1159
CTD_CHEMICALS_DISEASES	Carcinoma, Squamous Cell	10	23.81	0.0084	92-52-4, 120-80-9, 132-64-9, 90-12-0, 90-47-1, 2243-62-1, 90-13-1, 571-58-4, 90-15-3, 192-97-2	28	361	2583	2.56	1	0.9313	0.1201
HTS_ACTIVE	xenobiotic homeostasis:tox21-ahr-p1_ahr-agonist_1	8	19.05	0.0086	52417-22-8, 573-17-1, 120-80-9, 56-55-3, 90-15-3, 192-97-2, 2243-62-1, 134-32-7	31	527	6512	3.19	1	0.9386	0.1211
CTD_CHEMICALS_GOENRICH_MOLFUNCT	GO:0005201|extracellular matrix structural constituent	5	11.9	0.0088	192-97-2, 91-20-3, 53-70-3, 218-01-9, 56-55-3	14	74	1090	5.26	1	0.9453	0.1219
CTD_CHEMICALS_PATHWAYS	REACT:R-HSA-76005|Response to elevated platelet cytosolic Ca2+	5	11.9	0.0103	53-70-3, 91-20-3, 56-55-3, 218-01-9, 108-86-1	13	73	939	4.95	1	1	0.1421
CTD_CHEMICALS_DISEASES	Adenocarcinoma of Lung	8	19.05	0.0122	132-65-0, 92-52-4, 90-12-0, 134-32-7, 132-64-9, 86-74-8, 90-15-3, 192-97-2	28	251	2583	2.94	1	1	0.1633
CTD_CHEMICALS_DISEASES	Edema	10	23.81	0.0122	132-64-9, 87-82-1, 83-56-7, 120-80-9, 106-37-6, 108-90-7, 192-97-2, 571-58-4, 215-58-7, 86-74-8	28	382	2583	2.41	1	1	0.1633
CTD_CHEMICALS_DISEASES	Birth Weight	6	14.29	0.0122	86-74-8, 90-12-0, 215-58-7, 134-32-7, 132-64-9, 90-15-3	28	137	2583	4.04	1	1	0.1633
ADVERSE_EFFECT	DNA_Carcinogenicity	3	7.14	0.0136	120-80-9, 108-90-7, 192-97-2	3	110	941	8.55	1	1	0.1774
MESH	Biphenyl Compounds	3	7.14	0.0136	5436-43-1, 92-66-0, 92-52-4	31	32	5355	16.19	1	1	0.1774
MESH	Benzene Derivatives	10	23.81	0.0143	120-80-9, 106-37-6, 108-90-7, 92-52-4, 5436-43-1, 87-82-1, 100-39-0, 108-86-1, 92-66-0, 91-16-7	31	722	5355	2.39	1	1	0.1835
HTS_STRONGACTIVE	cell viability:tox21-dt40-p1_viability@653_1	2	4.76	0.0144	52417-22-8, 120-80-9	23	1324	4870	0.32	1	1	0.1835
HTS_STRONGACTIVE	cell viability:tox21-dt40-p1_viability@100_1	2	4.76	0.0145	120-80-9, 52417-22-8	23	1319	4870	0.32	1	1	0.1835
CTD_CHEMICALS_DISEASES	Occupational Diseases	9	21.43	0.0147	215-58-7, 484-23-1, 90-15-3, 92-52-4, 91-20-3, 108-86-1, 87-82-1, 2243-62-1, 132-64-9	28	325	2583	2.55	1	1	0.1851
MESH	Hydrocarbons, Halogenated	5	11.9	0.0158	108-90-7, 106-37-6, 87-82-1, 108-86-1, 5436-43-1	31	176	5355	4.91	1	1	0.1974
CTD_CHEMICALS_DISEASES	Tobacco Use Disorder	9	21.43	0.0166	90-15-3, 100-39-0, 215-58-7, 86-74-8, 134-32-7, 90-12-0, 85-01-8, 120-80-9, 132-65-0	28	332	2583	2.5	1	1	0.2053
TOXCAST_ACTIVE	ATG_Ahr_CIS_up	6	14.29	0.0178	53-70-3, 571-58-4, 90-15-3, 56-55-3, 120-80-9, 2243-62-1	14	217	1694	3.35	1	1	0.2175
MULTICASE_TOX_PREDICTION	MCT1 inhibition at 10uM	38	90.48	0.0181	571-58-4, 1564-64-3, 53-70-3, 120-80-9, 132-64-9, 101-55-3, 2243-62-1, 92-66-0, 90-13-1, 100-65-2, 92-52-4, 484-23-1, 85-01-8, 573-17-1, 95-46-5, 91-16-7, 108-90-7, 56-55-3, 90-15-3, 523-27-3, 100-39-0, 87-82-1, 215-58-7, 132-65-0, 108-86-1, 218-01-9, 106-37-6, 2243-61-0, 86-74-8, 2113-57-7, 134-32-7, 90-47-1, 52417-22-8, 91-20-3, 5436-43-1, 90-12-0, 192-97-2, 3811-73-2	38	6977	7882	1.13	1	1	0.2192
HTS_ACTIVE	sex hormone homeostasis:tox21-ar-mda-kb2-luc-antagonist-p2_ar-antagonist_1	11	26.19	0.0183	5436-43-1, 52417-22-8, 92-66-0, 2113-57-7, 90-15-3, 86-74-8, 83-56-7, 132-65-0, 56-55-3, 573-17-1, 85-01-8	31	1010	6512	2.29	1	1	0.2192
CTD_CHEMICALS_GOENRICH_CELLCOMP	GO:0042175|nuclear outer membrane-endoplasmic reticulum membrane network	10	23.81	0.0188	53-70-3, 91-20-3, 132-65-0, 56-55-3, 218-01-9, 192-97-2, 90-15-3, 85-01-8, 134-32-7, 108-86-1	15	362	1103	2.03	1	1	0.223
CTD_CHEMICALS_GOENRICH_CELLCOMP	GO:0098827|endoplasmic reticulum subcompartment	10	23.81	0.019	91-20-3, 132-65-0, 56-55-3, 218-01-9, 53-70-3, 85-01-8, 134-32-7, 108-86-1, 90-15-3, 192-97-2	15	363	1103	2.03	1	1	0.2237
MULTICASE_TOX_PREDICTION	MDR1 substrates	4	9.52	0.02	571-58-4, 484-23-1, 2243-61-0, 523-27-3	38	1899	7882	0.44	1	1	0.2316
TOXPRINT_STRUCTURE	ring:hetero_[6]_Z_generic	4	9.52	0.02	484-23-1, 90-47-1, 52417-22-8, 3811-73-2	38	2025	8195	0.43	1	1	0.2316
MULTICASE_TOX_PREDICTION	OATP2B1 inhibition at 100uM	6	14.29	0.0202	571-58-4, 106-37-6, 2243-61-0, 92-66-0, 101-55-3, 5436-43-1	38	2433	7882	0.51	1	1	0.2317
CTD_CHEMICALS_GOENRICH_CELLCOMP	GO:0062023|collagen-containing extracellular matrix	5	11.9	0.0204	218-01-9, 192-97-2, 56-55-3, 53-70-3, 91-20-3	15	88	1103	4.18	1	1	0.2317
CTD_CHEMICALS_DISEASES	SPERMATOGENIC FAILURE, X-LINKED, 2	2	4.76	0.0208	56-55-3, 218-01-9	28	2	2583	92.25	1	1	0.2345
CTD_CHEMICALS_GENES	NQO1	5	11.9	0.0211	53-70-3, 56-55-3, 2243-62-1, 215-58-7, 87-82-1	27	95	2273	4.43	1	1	0.2361
CTD_CHEMICALS_DISEASES	Keratosis	9	21.43	0.0214	86-74-8, 215-58-7, 106-37-6, 85-01-8, 134-32-7, 2243-62-1, 120-80-9, 87-82-1, 90-12-0	28	347	2583	2.39	1	1	0.2368
CTD_CHEMICALS_GOENRICH_CELLCOMP	GO:0043230|extracellular organelle	3	7.14	0.0226	91-20-3, 53-70-3, 56-55-3	15	19	1103	11.61	1	1	0.2475
CTD_CHEMICALS_GENES	HMX1	2	4.76	0.0228	192-97-2, 132-65-0	27	2	2273	84.19	1	1	0.2475
CTD_CHEMICALS_DISEASES	Pulmonary Disease, Chronic Obstructive	11	26.19	0.0229	90-12-0, 132-64-9, 92-52-4, 100-39-0, 53-70-3, 2243-62-1, 90-13-1, 108-90-7, 571-58-4, 90-15-3, 215-58-7	28	484	2583	2.1	1	1	0.2475
CTD_CHEMICALS_DISEASES	Carcinoma, Pancreatic Ductal	6	14.29	0.0233	2243-62-1, 90-15-3, 218-01-9, 108-86-1, 53-70-3, 56-55-3	28	161	2583	3.44	1	1	0.25
CTD_CHEMICALS_DISEASES	Varicose Veins	4	9.52	0.0245	53-70-3, 91-20-3, 56-55-3, 218-01-9	28	61	2583	6.05	1	1	0.2605
PHARMACTIONLIST	Toxic Actions	4	9.52	0.026	134-32-7, 86-74-8, 92-52-4, 53-70-3	6	405	2720	4.48	1	1	0.2738
TISSUE_TOXICITY	Carcinogenicity	3	7.14	0.0276	120-80-9, 108-90-7, 192-97-2	3	113	678	6	1	1	0.287
MULTICASE_TOX_PREDICTION	RCA survival pre-implantation, mouse	5	11.9	0.0276	90-15-3, 90-12-0, 90-13-1, 134-32-7, 91-20-3	38	247	7882	4.2	1	1	0.287
HTS_STRONGACTIVE	xenobiotic homeostasis:tox21-car-agonist-p1_car-agonist_1	7	16.67	0.0279	192-97-2, 2243-62-1, 573-17-1, 90-47-1, 83-56-7, 5436-43-1, 56-55-3	23	537	4870	2.76	1	1	0.2874
CTD_CHEMICALS_DISEASES	Liver Cirrhosis	11	26.19	0.0283	571-58-4, 90-15-3, 484-23-1, 215-58-7, 86-74-8, 134-32-7, 90-13-1, 218-01-9, 90-12-0, 120-80-9, 92-52-4	28	505	2583	2.01	1	1	0.2897
CTD_CHEMICALS_DISEASES	Adenocarcinoma	2	4.76	0.0287	95-56-7, 53-70-3	28	521	2583	0.35	1	1	0.2899
CTD_CHEMICALS_DISEASES	Nervous System Diseases	2	4.76	0.0288	132-64-9, 108-90-7	28	518	2583	0.36	1	1	0.2899
MULTICASE_TOX_PREDICTION	ARE activation in keratinocytes at 100uM	23	54.76	0.029	90-12-0, 56-55-3, 192-97-2, 90-15-3, 523-27-3, 100-39-0, 87-82-1, 484-23-1, 85-01-8, 573-17-1, 2243-61-0, 86-74-8, 134-32-7, 52417-22-8, 91-20-3, 218-01-9, 215-58-7, 571-58-4, 1564-64-3, 53-70-3, 132-64-9, 132-65-0, 90-13-1	38	3252	7882	1.47	1	1	0.2899
CTD_CHEMICALS_DISEASES	Precursor Cell Lymphoblastic Leukemia-Lymphoma	10	23.81	0.0298	92-52-4, 120-80-9, 87-82-1, 132-64-9, 90-12-0, 218-01-9, 90-47-1, 90-13-1, 2243-62-1, 571-58-4	28	418	2583	2.21	1	1	0.2941
CTD_CHEMICALS_DISEASES	Neoplasms	12	28.57	0.0299	90-12-0, 132-64-9, 87-82-1, 120-80-9, 91-20-3, 2243-62-1, 134-32-7, 106-37-6, 108-90-7, 90-15-3, 215-58-7, 86-74-8	28	554	2583	2	1	1	0.2941
HTS_ACTIVE	counter screen (cell viability):tox21-shh-3t3-gli3-agonist-p1_viability_1	2	4.76	0.0312	83-56-7, 120-80-9	31	1197	6512	0.35	1	1	0.304
CTD_CHEMICALS_DISEASES	Liver Neoplasms, Experimental	12	28.57	0.0314	218-01-9, 90-12-0, 132-64-9, 56-55-3, 92-52-4, 108-90-7, 571-58-4, 90-15-3, 215-58-7, 86-74-8, 108-86-1, 90-13-1	28	566	2583	1.96	1	1	0.304
CTD_CHEMICALS_GOENRICH_MOLFUNCT	GO:0005198|structural molecule activity	6	14.29	0.0321	91-20-3, 53-70-3, 56-55-3, 192-97-2, 108-86-1, 218-01-9	14	162	1090	2.88	1	1	0.3051
CTD_CHEMICALS_GOENRICH_MOLFUNCT	GO:0016705|oxidoreductase activity, acting on paired donors, with incorporation or reduction of molecular oxygen	6	14.29	0.0321	108-86-1, 90-15-3, 134-32-7, 85-01-8, 53-70-3, 91-20-3	14	162	1090	2.88	1	1	0.3051
CTD_CHEMICALS_DISEASES	Pruritus	5	11.9	0.0322	86-74-8, 90-12-0, 215-58-7, 134-32-7, 192-97-2	28	118	2583	3.91	1	1	0.3051
MESH	Benz(a)Anthracenes	2	4.76	0.0332	56-55-3, 53-70-3	31	6	5355	57.58	1	1	0.3121
CTD_GOSLIM_BIOPROCESS	GO:0007005|mitochondrion organization	2	4.76	0.0348	53-70-3, 91-20-3	20	409	1491	0.36	1	1	0.3251
CTD_CHEMICALS_GOENRICH_MOLFUNCT	GO:0004497|monooxygenase activity	5	11.9	0.0353	90-15-3, 134-32-7, 85-01-8, 53-70-3, 91-20-3	14	111	1090	3.51	1	1	0.3251
CTD_CHEMICALS_GOENRICH_MOLFUNCT	GO:0005506|iron ion binding	5	11.9	0.0353	85-01-8, 91-20-3, 53-70-3, 90-15-3, 134-32-7	14	111	1090	3.51	1	1	0.3251
ACTIVITY_CLASS	Toxicant, DNA damaging	2	4.76	0.0359	108-90-7, 120-80-9	2	22	612	27.82	1	1	0.3288
CTD_CHEMICALS_DISEASES	Dermatitis, Contact	10	23.81	0.0365	120-80-9, 92-52-4, 90-12-0, 218-01-9, 87-82-1, 132-64-9, 100-39-0, 134-32-7, 2243-62-1, 86-74-8	28	443	2583	2.08	1	1	0.332
TOXCAST_ACTIVE	APR_HepG2_MitoticArrest_72h_up	6	14.29	0.0379	91-20-3, 101-55-3, 56-55-3, 2243-62-1, 132-64-9, 3811-73-2	14	262	1694	2.77	1	1	0.3364
HTS_ACTIVE	counter screen (cell viability):tox21-gh3-tre-antagonist-p1_viability_1	4	9.52	0.0381	120-80-9, 132-65-0, 92-66-0, 5436-43-1	31	1752	6512	0.48	1	1	0.3364
HTS_ACTIVE	cell viability:tox21-dt40-p1_viability@100_1	7	16.67	0.0382	56-55-3, 52417-22-8, 2243-62-1, 573-17-1, 132-65-0, 120-80-9, 85-01-8	31	2530	6512	0.58	1	1	0.3364
CTD_CHEMICALS_DISEASES	Sleep Disorders, Circadian Rhythm	3	7.14	0.0382	56-55-3, 53-70-3, 218-01-9	28	30	2583	9.22	1	1	0.3364
CTD_CHEMICALS_GOENRICH_CELLCOMP	GO:0043227|membrane-bounded organelle	7	16.67	0.0385	132-65-0, 132-64-9, 85-01-8, 91-20-3, 134-32-7, 108-86-1, 90-15-3	15	769	1103	0.67	1	1	0.3364
PHARMACTIONLIST	Therapeutic Uses	2	4.76	0.0386	484-23-1, 3811-73-2	6	1851	2720	0.49	1	1	0.3364
CTD_CHEMICALS_GOENRICH_MOLFUNCT	GO:0003824|catalytic activity	13	30.95	0.0388	91-20-3, 132-65-0, 56-55-3, 120-80-9, 87-82-1, 132-64-9, 218-01-9, 53-70-3, 85-01-8, 134-32-7, 108-86-1, 90-15-3, 108-90-7	14	684	1090	1.48	1	1	0.3364
MODE_CLASS	Distorts /blocks macromolecular scaffold function	2	4.76	0.0393	120-80-9, 192-97-2	2	58	1476	25.45	1	1	0.3381
KNOWN_TOXICITY	Carcinogenicity	3	7.14	0.04	120-80-9, 192-97-2, 108-90-7	3	136	678	4.99	1	1	0.342
HTS_STRONGACTIVE	xenobiotic homeostasis:tox21-p450-3a4-p1_3a4-inhibitor_1	2	4.76	0.0404	2243-62-1, 484-23-1	23	1141	4870	0.37	1	1	0.3422
CTD_CHEMICALS_GOENRICH_MOLFUNCT	GO:0016740|transferase activity	9	21.43	0.0405	218-01-9, 91-20-3, 56-55-3, 132-65-0, 53-70-3, 134-32-7, 85-01-8, 192-97-2, 90-15-3	14	367	1090	1.91	1	1	0.3422
CTD_CHEMICALS_PATHWAYS	REACT:R-HSA-156580|Phase II conjugation	4	9.52	0.041	90-15-3, 91-20-3, 85-01-8, 108-86-1	13	63	939	4.59	1	1	0.3434
TOXREFDB	non-neoplastic_CHR_rat_M_adult_in life observation_mortality	3	7.14	0.0424	120-80-9, 92-52-4, 108-90-7	4	110	883	6.02	1	1	0.3517
MECHANISM	Inhibit DNA synthesis, repair, and function	2	4.76	0.0425	192-97-2, 120-80-9	2	65	1530	23.54	1	1	0.3517
MULTICASE_TOX_PREDICTION	ARE activation in keratinocytes at 1mM	23	54.76	0.0436	218-01-9, 571-58-4, 215-58-7, 1564-64-3, 53-70-3, 120-80-9, 132-65-0, 132-64-9, 90-13-1, 56-55-3, 90-12-0, 90-15-3, 192-97-2, 523-27-3, 100-39-0, 484-23-1, 85-01-8, 573-17-1, 2243-61-0, 86-74-8, 134-32-7, 52417-22-8, 91-20-3	38	3308	7882	1.44	1	1	0.3587
CTD_CHEMICALS_GOENRICH_CELLCOMP	GO:0044454|nuclear chromosome part	9	21.43	0.0448	192-97-2, 134-32-7, 85-01-8, 53-70-3, 218-01-9, 132-64-9, 56-55-3, 132-65-0, 91-20-3	15	346	1103	1.91	1	1	0.3624
TOXPRINT_STRUCTURE	chain:aromaticAlkane_Ph-C1_acyclic_connect_noDblBd	4	9.52	0.0449	90-12-0, 100-39-0, 571-58-4, 95-46-5	38	1808	8195	0.48	1	1	0.3624
PHARMACTIONLIST	Noxae	3	7.14	0.0451	134-32-7, 86-74-8, 53-70-3	6	197	2720	6.9	1	1	0.3624
CTD_CHEMICALS_GOENRICH_CELLCOMP	GO:0043226|organelle	7	16.67	0.0454	85-01-8, 132-65-0, 132-64-9, 90-15-3, 134-32-7, 108-86-1, 91-20-3	15	756	1103	0.68	1	1	0.3624
TOXCAST_ACTIVE	Tox21_AhR	5	11.9	0.0454	120-80-9, 56-55-3, 2243-62-1, 53-70-3, 90-15-3	14	186	1694	3.25	1	1	0.3624
CTD_CHEMICALS_DISEASES	Bone Resorption	5	11.9	0.0469	215-58-7, 134-32-7, 90-12-0, 95-56-7, 86-74-8	28	133	2583	3.47	1	1	0.3699
CTD_CHEMICALS_DISEASES	Dyslipidemias	5	11.9	0.0469	90-15-3, 215-58-7, 134-32-7, 90-12-0, 86-74-8	28	133	2583	3.47	1	1	0.3699
MULTICASE_TOX_PREDICTION	Dendritic cell activation at 1mM (CD86, CD54)	24	57.14	0.0475	53-70-3, 132-64-9, 132-65-0, 215-58-7, 571-58-4, 1564-64-3, 90-13-1, 218-01-9, 573-17-1, 2243-61-0, 484-23-1, 85-01-8, 52417-22-8, 5436-43-1, 91-20-3, 86-74-8, 134-32-7, 2113-57-7, 90-12-0, 56-55-3, 100-39-0, 90-15-3, 192-97-2, 523-27-3	38	3595	7882	1.38	1	1	0.372
CTD_CHEMICALS_DISEASES	Glucose Intolerance	5	11.9	0.048	92-52-4, 90-47-1, 215-58-7, 90-15-3, 90-12-0	28	134	2583	3.44	1	1	0.373
CTD_CHEMICALS_DISEASES	Hemolytic-Uremic Syndrome	7	16.67	0.0482	87-82-1, 2243-62-1, 85-01-8, 120-80-9, 484-23-1, 100-39-0, 215-58-7	28	261	2583	2.47	1	1	0.373
HTS_ACTIVE	counter screen (cell viability):tox21-shh-3t3-gli3-antagonist-p1_viability_1	2	4.76	0.0487	83-56-7, 120-80-9	31	1115	6512	0.38	1	1	0.3735
HTS_ACTIVE	counter screen (cell viability):tox21-h2ax-cho-p2_viability_1	2	4.76	0.0488	5436-43-1, 2113-57-7	31	1078	6512	0.39	1	1	0.3735
CTD_CHEMICALS_DISEASES	Vascular Diseases	6	14.29	0.0499	134-32-7, 90-12-0, 85-01-8, 215-58-7, 86-74-8, 90-47-1	28	197	2583	2.81	1	1	0.3791
CTD_CHEMICALS_GOENRICH_MOLFUNCT	GO:0005509|calcium ion binding	5	11.9	0.0505	53-70-3, 132-65-0, 56-55-3, 192-97-2, 218-01-9	14	124	1090	3.14	1	1	0.3816
CTD_CHEMICALS_PATHWAYS	REACT:R-HSA-211897|Cytochrome P450 - arranged by substrate type	4	9.52	0.0517	85-01-8, 90-15-3, 53-70-3, 91-20-3	13	69	939	4.19	1	1	0.3887
MULTICASE_TOX_PREDICTION	Local lymph node assay, mouse, extreme sensitizers (EC3 < 1%)	13	30.95	0.0543	56-55-3, 90-12-0, 100-39-0, 218-01-9, 192-97-2, 90-15-3, 53-70-3, 120-80-9, 85-01-8, 100-65-2, 91-20-3, 90-13-1, 134-32-7	38	1489	7882	1.81	1	1	0.4038
TOXCAST_ACTIVE	ATG_ERa_TRANS_up	8	19.05	0.0543	91-20-3, 92-52-4, 120-80-9, 56-55-3, 132-65-0, 132-64-9, 90-15-3, 101-55-3	14	465	1694	2.08	1	1	0.4038
HTS_ACTIVE	genotoxic stress:tox21-dt40-p1_srf-inducer_1	5	11.9	0.0557	90-15-3, 571-58-4, 90-47-1, 2113-57-7, 132-65-0	31	317	6512	3.31	1	1	0.4095
CTD_CHEMICALS_GENES	DUSP1	2	4.76	0.0559	108-90-7, 53-70-3	27	5	2273	33.67	1	1	0.4095
TOXPRINT_STRUCTURE	bond:CX_halide_aromatic-X_dihalo_benzene_(1_4-)	3	7.14	0.056	523-27-3, 106-37-6, 87-82-1	38	85	8195	7.61	1	1	0.4095
CTD_CHEMICALS_GENES	GSTM1	3	7.14	0.0564	2243-62-1, 91-20-3, 215-58-7	27	34	2273	7.43	1	1	0.41
HTS_ACTIVE	cell viability:tox21-dt40-p1_viability@653_1	7	16.67	0.0574	56-55-3, 2243-62-1, 101-55-3, 52417-22-8, 85-01-8, 573-17-1, 120-80-9	31	2467	6512	0.6	1	1	0.4147
HTS_ACTIVE	counter screen (cell viability):tox21-casp3-cho-p1_viability@cho-k1_1	4	9.52	0.0577	83-56-7, 120-80-9, 2243-62-1, 5436-43-1	31	1693	6512	0.5	1	1	0.415
CTD_CHEMICALS_PATHWAYS	KEGG:hsa04062|Chemokine signaling pathway	5	11.9	0.0584	56-55-3, 91-20-3, 218-01-9, 192-97-2, 134-32-7	13	122	939	2.96	1	1	0.4174
CTD_CHEMICALS_DISEASES	Opitz-Kaveggia syndrome	2	4.76	0.0612	132-65-0, 192-97-2	28	6	2583	30.75	1	1	0.4348
CTD_CHEMICALS_DISEASES	Liver Cirrhosis, Experimental	15	35.71	0.0617	108-90-7, 571-58-4, 484-23-1, 215-58-7, 95-56-7, 90-12-0, 56-55-3, 108-86-1, 2243-62-1, 90-13-1, 100-39-0, 218-01-9, 87-82-1, 91-20-3, 92-52-4	28	856	2583	1.62	1	1	0.436
HTS_ACTIVE	energy homeostasis:tox21-pgc-err-p1_pgc-err-agonist_1	6	14.29	0.062	484-23-1, 90-47-1, 120-80-9, 56-55-3, 5436-43-1, 218-01-9	31	472	6512	2.67	1	1	0.436
CTD_CHEMICALS_GOENRICH_CELLCOMP	GO:0005623|cell	8	19.05	0.0637	85-01-8, 132-64-9, 132-65-0, 90-15-3, 108-86-1, 134-32-7, 87-82-1, 91-20-3	15	810	1103	0.73	1	1	0.4433
CTD_CHEMICALS_GOENRICH_CELLCOMP	GO:0044464|cell part	8	19.05	0.0637	91-20-3, 87-82-1, 90-15-3, 134-32-7, 108-86-1, 132-65-0, 132-64-9, 85-01-8	15	810	1103	0.73	1	1	0.4433
CTD_CHEMICALS_DISEASES	Reperfusion Injury	3	7.14	0.0645	87-82-1, 53-70-3, 106-37-6	28	610	2583	0.45	1	1	0.4465
HTS_STRONGACTIVE	cytotoxicity:tox21-rt-viability-hek293-p1_viability@glo_40h_1	2	4.76	0.0658	52417-22-8, 120-80-9	23	998	4870	0.42	1	1	0.453
TOXPRINT_STRUCTURE	bond:CX_halide_aromatic-X_ether_aromatic_(Ph-O-Ph)	3	7.14	0.0669	90-47-1, 101-55-3, 5436-43-1	38	94	8195	6.88	1	1	0.4551
CTD_CHEMICALS_GOENRICH_CELLCOMP	GO:0031012|extracellular matrix	5	11.9	0.0671	192-97-2, 218-01-9, 91-20-3, 53-70-3, 56-55-3	15	127	1103	2.9	1	1	0.4551
CTD_CHEMICALS_DISEASES	Raynaud Disease	3	7.14	0.0672	215-58-7, 108-86-1, 2243-62-1	28	41	2583	6.75	1	1	0.4551
CTD_CHEMICALS_PATHWAYS	KEGG:hsa05152|Tuberculosis	2	4.76	0.0675	91-20-3, 134-32-7	13	323	939	0.45	1	1	0.4551
MULTICASE_TOX_PREDICTION	Local lymph node assay, mouse, weak sensitizers (EC3 < 100%)	27	64.29	0.0683	85-01-8, 573-17-1, 2243-61-0, 91-16-7, 86-74-8, 134-32-7, 52417-22-8, 90-47-1, 91-20-3, 90-12-0, 56-55-3, 90-15-3, 192-97-2, 523-27-3, 100-39-0, 571-58-4, 215-58-7, 1564-64-3, 53-70-3, 132-64-9, 120-80-9, 132-65-0, 2243-62-1, 90-13-1, 101-55-3, 100-65-2, 218-01-9	38	4322	7882	1.3	1	1	0.4584
HTS_ACTIVE	cytotoxicity:tox21-rt-viability-hek293-p1_viability@glo_32h_1	5	11.9	0.0689	120-80-9, 573-17-1, 5436-43-1, 52417-22-8, 90-47-1	31	1936	6512	0.54	1	1	0.4588
CTD_CHEMICALS_GOENRICH_MOLFUNCT	GO:0003700|DNA-binding transcription factor activity	8	19.05	0.0691	134-32-7, 218-01-9, 91-20-3, 132-65-0, 56-55-3, 85-01-8, 192-97-2, 53-70-3	14	325	1090	1.92	1	1	0.4588
CTD_CHEMICALS_DISEASES	Neuronopathy, Distal Hereditary Motor, Type V	2	4.76	0.071	56-55-3, 218-01-9	28	7	2583	26.36	1	1	0.469
TOXPRINT_STRUCTURE	bond:COC_ether_aromatic	3	7.14	0.072	90-47-1, 101-55-3, 5436-43-1	38	98	8195	6.6	1	1	0.473
HTS_ACTIVE	cytotoxicity:tox21-rt-viability-hek293-p1_viability@flor_40h_1	9	21.43	0.0728	52417-22-8, 101-55-3, 90-13-1, 2113-57-7, 132-65-0, 132-64-9, 573-17-1, 85-01-8, 571-58-4	31	963	6512	1.96	1	1	0.4737
CTD_CHEMICALS_DISEASES	Silicosis	8	19.05	0.0734	90-12-0, 132-64-9, 134-32-7, 56-55-3, 90-15-3, 100-39-0, 215-58-7, 86-74-8	28	333	2583	2.22	1	1	0.4737
TOXCAST_ACTIVE	ATG_RXRb_TRANS_up	6	14.29	0.0741	571-58-4, 90-12-0, 91-20-3, 92-52-4, 101-55-3, 85-01-8	14	313	1694	2.32	1	1	0.4737
HTS_ACTIVE	counter screen (cell viability):tox21-ks-are-p1_viability_1	2	4.76	0.0745	120-80-9, 83-56-7	31	1008	6512	0.42	1	1	0.4737
HTS_ACTIVE	counter screen (cell viability):tox21-p53-bla-p3_viability_1	2	4.76	0.0746	120-80-9, 5436-43-1	31	1014	6512	0.41	1	1	0.4737
HTS_ACTIVE	sterol homeostasis:tox21-ror-cho-antagonist-p1_ror-antgonist_1	2	4.76	0.0748	83-56-7, 120-80-9	31	1026	6512	0.41	1	1	0.4737
HTS_ACTIVE	counter screen (cell viability):tox21-ppard-bla-antagonist-p1_viability_1	2	4.76	0.0754	106-37-6, 52417-22-8	31	972	6512	0.43	1	1	0.4737
CTD_CHEMICALS_GOENRICH_MOLFUNCT	GO:0000981|DNA-binding transcription factor activity, RNA polymerase II-specific	8	19.05	0.0755	218-01-9, 134-32-7, 56-55-3, 85-01-8, 132-65-0, 91-20-3, 192-97-2, 53-70-3	14	333	1090	1.87	1	1	0.4737
CTD_CHEMICALS_DISEASES	Dermatitis, Atopic	8	19.05	0.0755	215-58-7, 86-74-8, 90-12-0, 132-64-9, 134-32-7, 56-55-3, 85-01-8, 92-52-4	28	338	2583	2.18	1	1	0.4737
CTD_CHEMICALS_PATHWAYS	KEGG:hsa01100|Metabolic pathways	10	23.81	0.0762	53-70-3, 56-55-3, 132-65-0, 91-20-3, 218-01-9, 90-15-3, 192-97-2, 85-01-8, 108-86-1, 134-32-7	13	434	939	1.66	1	1	0.4737
CTD_CHEMICALS_DISEASES	Fetal Alcohol Spectrum Disorders	4	9.52	0.0764	106-37-6, 91-20-3, 218-01-9, 87-82-1	28	96	2583	3.84	1	1	0.4737
CTD_CHEMICALS_DISEASES	Uveitis	4	9.52	0.0764	484-23-1, 90-47-1, 91-20-3, 132-65-0	28	96	2583	3.84	1	1	0.4737
CTD_CHEMICALS_PATHWAYS	KEGG:hsa04360|Axon guidance	3	7.14	0.0778	53-70-3, 218-01-9, 192-97-2	13	37	939	5.86	1	1	0.4742
CTD_CHEMICALS_GOENRICH_CELLCOMP	GO:0005694|chromosome	9	21.43	0.0782	192-97-2, 134-32-7, 85-01-8, 53-70-3, 218-01-9, 132-64-9, 56-55-3, 132-65-0, 91-20-3	15	353	1103	1.87	1	1	0.4742
CTD_CHEMICALS_DISEASES	Hepatomegaly	10	23.81	0.0782	2243-62-1, 134-32-7, 90-13-1, 85-01-8, 571-58-4, 484-23-1, 86-74-8, 90-12-0, 132-64-9, 92-52-4	28	488	2583	1.89	1	1	0.4742
LEADSCOPE_TOXICITY	Developmental Toxicity: visceral rodent	2	4.76	0.0783	90-12-0, 571-58-4	36	967	7259	0.42	1	1	0.4742
CTD_CHEMICALS_GOENRICH_CELLCOMP	GO:0044427|chromosomal part	9	21.43	0.0787	192-97-2, 134-32-7, 85-01-8, 53-70-3, 132-64-9, 218-01-9, 91-20-3, 56-55-3, 132-65-0	15	355	1103	1.86	1	1	0.4742
CTD_CHEMICALS_GOENRICH_CELLCOMP	GO:0000228|nuclear chromosome	9	21.43	0.0795	53-70-3, 56-55-3, 132-65-0, 91-20-3, 218-01-9, 132-64-9, 192-97-2, 85-01-8, 134-32-7	15	358	1103	1.85	1	1	0.4742
CTD_CHEMICALS_PATHWAYS	REACT:R-HSA-392499|Metabolism of proteins	9	21.43	0.0797	53-70-3, 218-01-9, 56-55-3, 132-65-0, 91-20-3, 192-97-2, 108-86-1, 134-32-7, 85-01-8	13	383	939	1.7	1	1	0.4742
CTD_CHEMICALS_GOENRICH_CELLCOMP	GO:0043229|intracellular organelle	7	16.67	0.0801	85-01-8, 132-65-0, 132-64-9, 90-15-3, 108-86-1, 134-32-7, 91-20-3	15	743	1103	0.69	1	1	0.4742
CTD_CHEMICALS_DISEASES	Craniofacial Abnormalities	5	11.9	0.0803	132-64-9, 91-20-3, 86-74-8, 53-70-3, 85-01-8	28	159	2583	2.9	1	1	0.4742
CTD_CHEMICALS_GOENRICH_CELLCOMP	GO:0005789|endoplasmic reticulum membrane	9	21.43	0.0805	134-32-7, 108-86-1, 85-01-8, 90-15-3, 218-01-9, 91-20-3, 132-65-0, 56-55-3, 53-70-3	15	361	1103	1.83	1	1	0.4742
CTD_CHEMICALS_DISEASES	Hemoglobinopathies	2	4.76	0.0807	120-80-9, 108-86-1	28	8	2583	23.06	1	1	0.4742
MULTICASE_TOX_PREDICTION	Tox21 ARE activation assay, only strong actives by NIEHS calls, research only	15	35.71	0.0811	56-55-3, 218-01-9, 192-97-2, 90-15-3, 523-27-3, 3811-73-2, 53-70-3, 120-80-9, 2243-61-0, 215-58-7, 1564-64-3, 100-65-2, 52417-22-8, 134-32-7, 2243-62-1	38	1919	7882	1.62	1	1	0.4742
CTD_CHEMICALS_GOENRICH_CELLCOMP	GO:0031984|organelle subcompartment	9	21.43	0.0812	192-97-2, 90-15-3, 134-32-7, 85-01-8, 53-70-3, 218-01-9, 56-55-3, 132-65-0, 91-20-3	15	363	1103	1.82	1	1	0.4742
CTD_CHEMICALS_DISEASES	Hypertension, Malignant	3	7.14	0.0822	95-56-7, 484-23-1, 132-65-0	28	46	2583	6.02	1	1	0.4779
HTS_ACTIVE	retinoid homeostasis:tox21-rar-agonist-p1_rar-agonist_1	6	14.29	0.0836	484-23-1, 2243-62-1, 90-47-1, 218-01-9, 5436-43-1, 56-55-3	31	515	6512	2.45	1	1	0.4839
HTS_STRONGACTIVE	cell viability:tox21-dt40-p1_viability@657_1	3	7.14	0.0868	120-80-9, 132-65-0, 52417-22-8	23	1279	4870	0.5	1	1	0.5002
TOXPRINT_STRUCTURE	ring:aromatic_biphenyl	3	7.14	0.0878	2113-57-7, 92-66-0, 92-52-4	38	110	8195	5.88	1	1	0.5037
CTD_CHEMICALS_GOENRICH_MOLFUNCT	GO:0005515|protein binding	8	19.05	0.09	91-20-3, 134-32-7, 108-86-1, 132-64-9, 120-80-9, 132-65-0, 108-90-7, 85-01-8	14	835	1090	0.75	1	1	0.5117
CTD_CHEMICALS_DISEASES	Mastocytosis	2	4.76	0.0904	56-55-3, 132-65-0	28	9	2583	20.5	1	1	0.5117
CTD_CHEMICALS_DISEASES	Short Rib-Polydactyly Syndrome	2	4.76	0.0904	192-97-2, 132-65-0	28	9	2583	20.5	1	1	0.5117
CTD_CHEMICALS_PATHWAYS	REACT:R-HSA-211859|Biological oxidations	7	16.67	0.0917	90-15-3, 53-70-3, 218-01-9, 108-86-1, 134-32-7, 85-01-8, 91-20-3	13	247	939	2.05	1	1	0.5172
CTD_CHEMICALS_GOENRICH_MOLFUNCT	GO:0005543|phospholipid binding	4	9.52	0.0942	56-55-3, 53-70-3, 218-01-9, 192-97-2	14	94	1090	3.31	1	1	0.527
CTD_CHEMICALS_DISEASES	Osteoarthritis	8	19.05	0.0943	85-01-8, 108-86-1, 215-58-7, 192-97-2, 56-55-3, 87-82-1, 53-70-3, 100-39-0	28	369	2583	2	1	1	0.527
CTD_CHEMICALS_DISEASES	Chemical and Drug Induced Liver Injury	14	33.33	0.0955	92-52-4, 87-82-1, 100-39-0, 108-86-1, 134-32-7, 90-13-1, 2243-62-1, 86-74-8, 192-97-2, 90-12-0, 106-37-6, 484-23-1, 215-58-7, 571-58-4	28	830	2583	1.56	1	1	0.5317
CTD_CHEMICALS_PATHWAYS	KEGG:hsa04974|Protein digestion and absorption	2	4.76	0.0981	218-01-9, 192-97-2	13	8	939	18.06	1	1	0.5439
CTD_CHEMICALS_DISEASES	Hypertrophy, Left Ventricular	5	11.9	0.1005	86-74-8, 484-23-1, 215-58-7, 134-32-7, 90-12-0	28	172	2583	2.68	1	1	0.5548
HTS_STRONGACTIVE	retinoid homeostasis:tox21-rar-agonist-p1_rar-agonist_1	4	9.52	0.1021	90-47-1, 56-55-3, 218-01-9, 5436-43-1	23	252	4870	3.36	1	1	0.5593
HTS_STRONGACTIVE	cytotoxicity:tox21-rt-viability-hek293-p1_viability@glo_24h_1	2	4.76	0.1025	120-80-9, 52417-22-8	23	910	4870	0.47	1	1	0.5593
HTS_STRONGACTIVE	cytotoxicity:tox21-rt-viability-hek293-p1_viability@glo_32h_1	2	4.76	0.103	120-80-9, 52417-22-8	23	969	4870	0.44	1	1	0.5593
TOXINS_TARGETS	TP53	3	7.14	0.1031	91-20-3, 90-12-0, 56-55-3	16	45	1220	5.08	1	1	0.5593
CTD_CHEMICALS_GOENRICH_MOLFUNCT	GO:0020037|heme binding	5	11.9	0.1058	90-15-3, 134-32-7, 85-01-8, 53-70-3, 91-20-3	14	158	1090	2.46	1	1	0.5692
CTD_CHEMICALS_GOENRICH_MOLFUNCT	GO:0046906|tetrapyrrole binding	5	11.9	0.1058	85-01-8, 53-70-3, 91-20-3, 134-32-7, 90-15-3	14	158	1090	2.46	1	1	0.5692
CTD_CHEMICALS_DISEASES	Cachexia	5	11.9	0.1089	56-55-3, 120-80-9, 91-20-3, 218-01-9, 108-86-1	28	177	2583	2.61	1	1	0.5838
TOXPRINT_STRUCTURE	ring:hetero_[6]_Z_1-	3	7.14	0.1096	3811-73-2, 52417-22-8, 90-47-1	38	1280	8195	0.51	1	1	0.5849
CTD_CHEMICALS_DISEASES	Behcet Syndrome	7	16.67	0.1122	215-58-7, 86-74-8, 134-32-7, 87-82-1, 90-12-0, 108-86-1, 106-37-6	28	288	2583	2.24	1	1	0.5916
CTD_CHEMICALS_DISEASES	Cardiomegaly	9	21.43	0.1124	100-39-0, 90-47-1, 90-12-0, 218-01-9, 92-52-4, 484-23-1, 108-90-7, 86-74-8, 134-32-7	28	430	2583	1.93	1	1	0.5916
MESH	Organic Chemicals	26	61.9	0.1126	3811-73-2, 192-97-2, 90-15-3, 87-82-1, 100-39-0, 108-90-7, 90-12-0, 56-55-3, 134-32-7, 91-16-7, 5436-43-1, 91-20-3, 106-37-6, 85-01-8, 2243-61-0, 108-86-1, 218-01-9, 92-52-4, 2243-62-1, 92-66-0, 90-13-1, 100-65-2, 571-58-4, 120-80-9, 132-65-0, 53-70-3	31	3705	5355	1.21	1	1	0.5916
HTS_ACTIVE	cytotoxicity:tox21-rt-viability-hepg2-p1_viability@flor_32h_1	2	4.76	0.1128	132-65-0, 52417-22-8	31	898	6512	0.47	1	1	0.5916
HTS_ACTIVE	counter screen (cell viability):tox21-fxr-bla-agonist-p2_viability_1	2	4.76	0.1133	5436-43-1, 52417-22-8	31	886	6512	0.47	1	1	0.5916
CTD_CHEMICALS_DISEASES	Salivary Gland Neoplasms	4	9.52	0.1137	56-55-3, 91-20-3, 90-15-3, 192-97-2	28	114	2583	3.24	1	1	0.5916
HTS_STRONGACTIVE	energy homeostasis:tox21-pgc-err-p1_pgc-err-agonist_1	4	9.52	0.1145	484-23-1, 218-01-9, 56-55-3, 120-80-9	23	265	4870	3.2	1	1	0.5916
CTD_CHEMICALS_DISEASES	Osteogenesis Imperfecta, Type IV	3	7.14	0.1148	91-20-3, 56-55-3, 218-01-9	28	56	2583	4.94	1	1	0.5916
HTS_ACTIVE	cytotoxicity:tox21-rt-viability-hek293-p1_viability@glo_40h_1	6	14.29	0.1149	5436-43-1, 52417-22-8, 90-47-1, 120-80-9, 573-17-1, 192-97-2	31	1965	6512	0.64	1	1	0.5916
LEADSCOPE_TOXICITY	Developmental Toxicity: visceral rat	2	4.76	0.1169	571-58-4, 90-12-0	36	881	7259	0.46	1	1	0.5996
CTD_CHEMICALS_DISEASES	Neoplasm Metastasis	12	28.57	0.1201	215-58-7, 108-90-7, 86-74-8, 134-32-7, 108-86-1, 95-56-7, 106-37-6, 100-39-0, 87-82-1, 132-64-9, 90-12-0, 92-52-4	28	677	2583	1.64	1	1	0.6108
CTD_CHEMICALS_GOENRICH_CELLCOMP	GO:0044420|extracellular matrix component	2	4.76	0.1204	56-55-3, 218-01-9	15	10	1103	14.71	1	1	0.6108
TOXPRINT_STRUCTURE	ring:hetero_[6]_N_pyridine_generic	2	4.76	0.1205	52417-22-8, 3811-73-2	38	976	8195	0.44	1	1	0.6108
CTD_GOSLIM_BIOPROCESS	GO:0006914|autophagy	3	7.14	0.1212	53-70-3, 192-97-2, 134-32-7	20	414	1491	0.54	1	1	0.6122
CTD_CHEMICALS_GOENRICH_MOLFUNCT	GO:0001228|DNA-binding transcription activator activity, RNA polymerase II-specific	7	16.67	0.1221	192-97-2, 53-70-3, 218-01-9, 134-32-7, 132-65-0, 56-55-3, 91-20-3	14	292	1090	1.87	1	1	0.614
CTD_CHEMICALS_DISEASES	Lymphoma, Non-Hodgkin	4	9.52	0.1228	2243-62-1, 87-82-1, 108-86-1, 120-80-9	28	118	2583	3.13	1	1	0.614
CTD_CHEMICALS_DISEASES	Hyperthyroidism	5	11.9	0.123	90-47-1, 108-90-7, 106-37-6, 87-82-1, 108-86-1	28	185	2583	2.49	1	1	0.614
TOXCAST_ACTIVE	ATG_PPARg_TRANS_up	2	4.76	0.1244	90-15-3, 56-55-3	14	503	1694	0.48	1	1	0.6183
HTS_ACTIVE	counter screen (cell viability):tox21-pxr-p1_viability_1	4	9.52	0.1248	2243-62-1, 52417-22-8, 83-56-7, 56-55-3	31	1459	6512	0.58	1	1	0.6183
CTD_CHEMICALS_GOENRICH_CELLCOMP	GO:0099512|supramolecular fiber	5	11.9	0.1255	192-97-2, 218-01-9, 91-20-3, 53-70-3, 56-55-3	15	157	1103	2.34	1	1	0.6193
CTD_CHEMICALS_DISEASES	Mesothelioma	9	21.43	0.1267	2243-62-1, 106-37-6, 108-90-7, 87-82-1, 218-01-9, 92-52-4, 56-55-3, 90-47-1, 53-70-3	28	462	2583	1.8	1	1	0.6231
CTD_CHEMICALS_GOENRICH_MOLFUNCT	GO:0005178|integrin binding	4	9.52	0.1273	53-70-3, 56-55-3, 192-97-2, 218-01-9	14	107	1090	2.91	1	1	0.6236
CTD_CHEMICALS_DISEASES	Ichthyosis, Lamellar	2	4.76	0.128	91-20-3, 192-97-2	28	13	2583	14.19	1	1	0.6236
CTD_CHEMICALS_DISEASES	Hypersensitivity	7	16.67	0.1282	132-64-9, 92-52-4, 56-55-3, 215-58-7, 100-39-0, 108-90-7, 53-70-3	28	312	2583	2.07	1	1	0.6236
CTD_CHEMICALS_GOENRICH_CELLCOMP	GO:0099080|supramolecular complex	5	11.9	0.13	218-01-9, 192-97-2, 56-55-3, 53-70-3, 91-20-3	15	159	1103	2.31	1	1	0.6238
CTD_CHEMICALS_GOENRICH_CELLCOMP	GO:0005604|basement membrane	2	4.76	0.1316	218-01-9, 53-70-3	15	11	1103	13.37	1	1	0.6238
CTD_CHEMICALS_GOENRICH_CELLCOMP	GO:0005622|intracellular	8	19.05	0.1317	85-01-8, 132-65-0, 132-64-9, 108-86-1, 134-32-7, 90-15-3, 91-20-3, 87-82-1	15	786	1103	0.75	1	1	0.6238
CTD_CHEMICALS_GOENRICH_CELLCOMP	GO:0044424|intracellular part	8	19.05	0.1317	85-01-8, 132-64-9, 132-65-0, 134-32-7, 108-86-1, 90-15-3, 87-82-1, 91-20-3	15	786	1103	0.75	1	1	0.6238
CTD_CHEMICALS_GOENRICH_CELLCOMP	GO:0005737|cytoplasm	9	21.43	0.1319	132-64-9, 132-65-0, 108-90-7, 85-01-8, 87-82-1, 91-20-3, 90-15-3, 134-32-7, 108-86-1	15	824	1103	0.8	1	1	0.6238
[truncated: 1,034 more rows]

## Sheet: PAH chemical list
CASRN	Chemical Name
[truncated: 42 more rows]

[truncated: 2 more sheets: DGRE results, DGRE chemical list]
